# Supplementary material for: Ligand-assisted manganese-enabled direct C–H difluoromethylation of arenes
Source: Royal Society of Chemistry journal article supplement (doi:10.1039/d4qo00786g), 2024-01-01

## Supporting information

### A Ligand assisted Manganese-enabled Direct C-H Difluoromethylation of Arenes

Kehan Zhou <sup>a</sup>, Shuang Xia <sup>a</sup>, Yuheng Xiao <sup>a</sup>, Zhibin Huang <sup>a</sup>, Jingyu Zhang <sup>b</sup>, Yingsheng Zhao <sup>a\*</sup>

<sup>a</sup> Key Laboratory of Organic Synthesis of Jiangsu Province, College of Chemistry, Chemical Engineering and Materials Science Soochow University, Suzhou 215123, P. R. China. E-mail: [yszhao@suda.edu.cn](mailto:yszhao@suda.edu.cn)

<sup>b</sup> College of Energy, Soochow Institute for Energy and Materials Innovations, Soochow University, Suzhou 215006, China. E-mail: [jy Zhang@suda.edu.cn](mailto:jy Zhang@suda.edu.cn)

### Table of Contents

|                                                         |    |
|---------------------------------------------------------|----|
| 1. Reagents                                             | 2  |
| 2. Instruments                                          | 2  |
| 3. Preparation of starting materials                    | 2  |
| 4. Screening of ligand                                  | 5  |
| 5. Screening of solvent                                 | 6  |
| 6. Synthetic Application                                | 6  |
| 7. Gram-scale synthesis                                 | 7  |
| 8. Synthesis of Mn complex                              | 8  |
| 9. Radical trapping experiments                         | 9  |
| 10. Light ON-OFF experiments                            | 9  |
| 11. KIE experiments                                     | 10 |
| 12. General Procedure for difluoromethylation of arenes | 10 |
| 13. Reference                                           | 34 |
| 14. Copies of NMR spectra                               | 36 |

## 1. Reagents

Unless otherwise noted, all reagents were purchased from commercial suppliers and used without further purification. Column chromatography purifications were performed using 200–300 mesh silica gel.

## 2. Instruments

NMR spectra were recorded on Varian Inova–400 MHz, Inova–300 MHz, Bruker DRX–400 or Bruker DRX–500 instruments and calibrated using residual solvent peaks as internal reference. Multiplicities are recorded as: s = singlet, d = doublet, t = triplet, q = quartet, dd = doublet of doublets, t = triplet, m = multiplet. HRMS analysis were carried out using a Bruker microTOF–Q instrument or a TOF–MS instrument.

## 3. Preparation of starting materials

### 3.1 Synthesis of bromofluoromethyl reagents

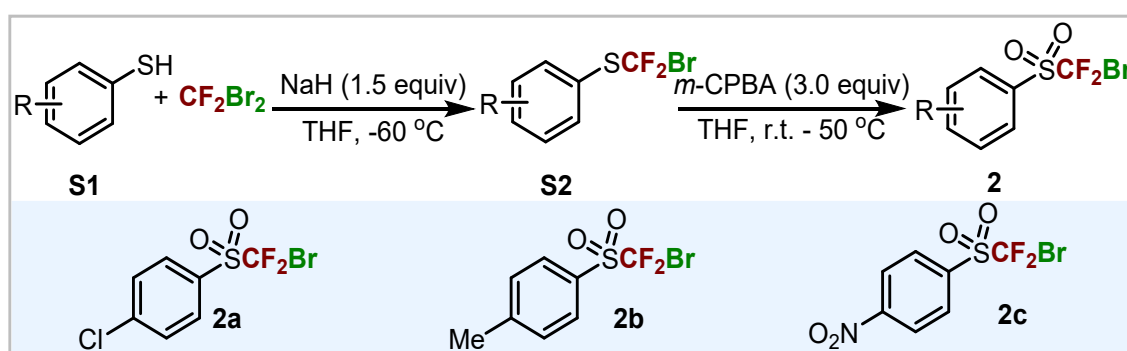

**2a**, **2b** and **2c** was prepared according to reported methods.<sup>1</sup>

**Step 1:** Thiophenol (**S1**, 20 mmol, 1.0 equiv.) diluted in THF (10 mL) was slowly added to a suspension of 60% NaH (30 mmol, 1.5 equiv.) in anhydrous THF (40 mL) at  $0\text{ }^\circ\text{C}$  over a period of 30 minutes under nitrogen atmosphere. The mixture was cooled to  $-60\text{ }^\circ\text{C}$  for 1 h, then  $\text{CF}_2\text{Br}_2$  (60 mmol, 3.0 equiv.) diluted in THF (10 mL) was added portionwise, and stirred for 3 h at  $-60\text{ }^\circ\text{C}$ . Then the reaction mixture was slowly warmed to room temperature and stirred overnight. The reaction was cooled in an ice-water bath and the excess of NaH was quenched by dropwise addition of water. The aqueous phase was extracted with EtOAc (3 x 60 mL), the combined organic layers washed with water (3 x 60 mL), brine (100 mL), and dried over  $\text{Na}_2\text{SO}_4$ . After the removal of the solvent under reduced pressure, the crude product was purified by flash column chromatography to give a colorless liquid of intermediate **S2**.

**Step 2:** To a solution of intermediate **S2** in DCM (40 mL) was slowly added *m*-CPBA (3.0 equiv.) at  $0\text{ }^\circ\text{C}$ , and the reaction was stirred at  $50\text{ }^\circ\text{C}$  for 4 h. Then the reaction mixture was concentrated, dissolved in EtOAc (100 mL) and washed with 10 % NaOH (100 mL), saturated NaCl (100 mL) and dried over  $\text{Na}_2\text{SO}_4$ . The solvent was removed in vacuo and the residue was by flash column chromatography to give target product **2**.

### 3.2 Synthesis of 2-((bromodifluoromethyl)sulfonyl)benzo[d]thiazole

**2d** was prepared according to reported methods.<sup>2</sup>

**Step 1:** A dry flask was evacuated and backfilled with  $\text{N}_2$  for 3 times. NaH (33 mol) followed by DMF (80 mL) was added at  $0\text{ }^\circ\text{C}$ . Then **S3** (30 mol, 1.0 equiv.) in DMF (20 mL) was added dropwise with

syringe at 0°C, and then the mixture was stirred at r. t. for 0.5 h. CHClF<sub>2</sub> gas was bubbled to the system for 1 h. The mixture was stirred at r. t for 12 h. After the reaction was complete, the mixture was quenched dropwise by H<sub>2</sub>O at 0°C. The mixture was extracted with Et<sub>2</sub>O for 3 times. Then the organic phase was combined and dried over anhydrous Na<sub>2</sub>SO<sub>4</sub>. The solvent was removed under vacuum and the residue was purified by flash column chromatography on silica gel to provide **S4**.

**Step 2:** To a flask add **S4** (20 mmol, 1.0 equiv.), MeCN (20 mL), CCl<sub>4</sub> (20 mL), H<sub>2</sub>O (40 mL), and RuCl<sub>3</sub>·xH<sub>2</sub>O (5 mol%) were added. Then NaIO<sub>4</sub> (50 mol, 2.5 equiv.) was added. The mixture was stirred at r. t for 12 h. After the reaction was complete, the mixture was neutralized by saturated aq. NaHCO<sub>3</sub>. After filtration, the filter residue was washed with EtOAc. The filtrate mixture was extracted with EtOAc for 3 times. Then the organic phase was combined and dried over anhydrous Na<sub>2</sub>SO<sub>4</sub>. The solvent was removed under vacuum and the residue was purified by flash column chromatography on silica gel to provide **S5**.

**Step 3:** Sulfone **S5** (5 mmol, 1.0 equiv.) and NBS (15 mmol, 3.0 equiv.) were added to a dry Schlenk tube. The flask was evacuated and backfilled with pure N<sub>2</sub> for 3 times. Then THF (20 mL) was added with syringe under N<sub>2</sub> atmosphere. The mixture was cooled to -78 °C, LiHMDS (1.0 M in THF, 15 mmol, 15 mL, 3.0 equiv.) was added with syringe under N<sub>2</sub> atmosphere in 15 min. The mixture was stirred at -78 °C for 3 h. After the reaction was complete, the mixture was quenched by saturated aq. NH<sub>4</sub>Cl (10 mL). After the mixture was warmed to r. t., the aqueous layer was extracted with Et<sub>2</sub>O for 3 times. Then the organic phase was combined and dried over anhydrous Na<sub>2</sub>SO<sub>4</sub>. The solvent was removed under vacuum and the residue was purified by flash column chromatography on silica gel to provide the 2-((bromodifluoromethyl)sulfonyl)benzo[*d*]thiazole **2d**.

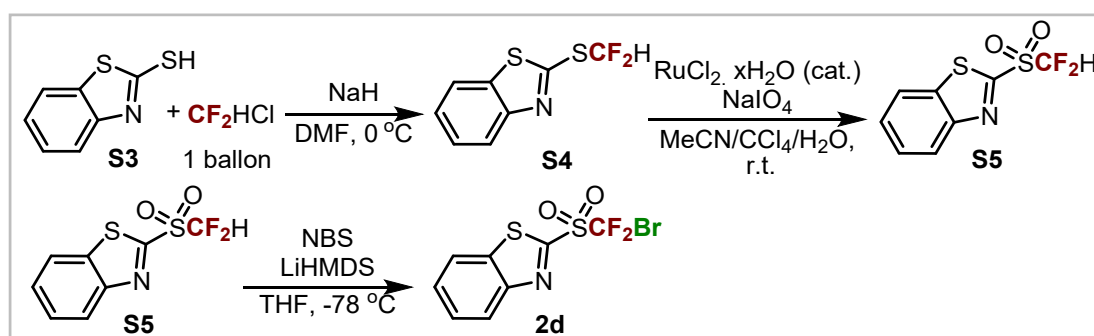

### 3.3 Synthesis of difluoromethyl-2-pyridyl sulfone

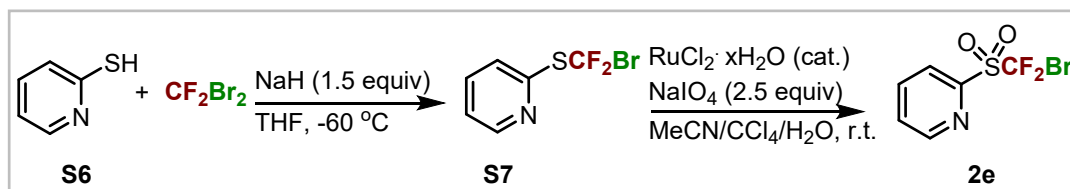

**2e** was prepared according to reported methods.<sup>1,2</sup>

**Step 1:** Thiophenol (**S6**, 20 mmol, 1.0 equiv.) diluted in THF (10 mL) was slowly added to a suspension of 60% NaH (30 mmol, 1.5 equiv.) in anhydrous THF (40 mL) at 0 °C over a period of 30 minutes under nitrogen atmosphere. The mixture was cooled to -60 °C for 1 h, then CF<sub>2</sub>Br<sub>2</sub> (60 mmol, 3.0 equiv.) diluted in THF (10 mL) was added portionwise, and stirred for 3 h at -60 °C. Then the reaction mixture was slowly warmed to room temperature and stirred overnight. The reaction was cooled in an ice water bath and the excess of NaH was quenched by dropwise addition of water. The aqueous phase was extracted with EtOAc (3 x 60 mL), the combined organic layers washed with water (3 x 60 mL), brine (100 mL),

and dried over Na<sub>2</sub>SO<sub>4</sub>. After the removal of the solvent under reduced pressure, the crude product was purified by flash column chromatography to give a colorless liquid of intermediate **S7**.

**Step 2:** To a flask **S7** (20 mmol, 1.0 equiv.), MeCN (20 mL), CCl<sub>4</sub> (20 mL), H<sub>2</sub>O (40 mL), and RuCl<sub>3</sub>·xH<sub>2</sub>O (5 mol%) were added. Then NaIO<sub>4</sub> (50 mol, 2.5 equiv.) was added. The mixture was stirred at r. t for 12 h. After the reaction was complete, the mixture was neutralized by saturated aq. NaHCO<sub>3</sub>. After filtration, the filter residue was washed with EtOAc. The filtrate mixture was extracted with EtOAc for 3 times. Then the organic phase was combined and dried over anhydrous Na<sub>2</sub>SO<sub>4</sub>. The solvent was removed under vacuum and the residue was purified by flash column chromatography on silica gel to provide target product.

### 3.4 Synthesis of *t*-Boc-protected anilines<sup>3</sup>

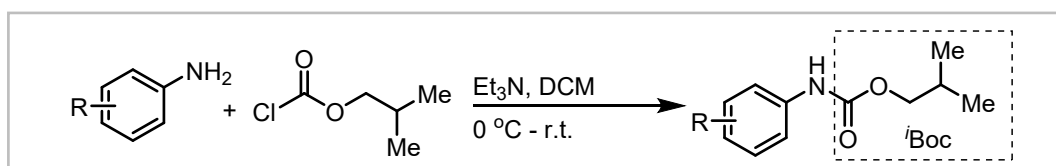

A solution of isobutyl chloroformate (2.2 mL, 1.7 equiv.) in 20 mL of DCM was cooled to 0 °C, and a solution of aniline (10 mmol) and triethylamine (1.8 mL, 1.3 equiv.) in 10 mL of DCM was added dropwise. The mixture was warmed to room temperature and stirred overnight. The mixture was extracted with EA (20 mL x 3), dried over anhydrous Na<sub>2</sub>SO<sub>4</sub> and concentrated in vacuo. The residue was purified by column chromatography on silica gel to give the corresponding product as a white solid with >90% yield.

#### 4. Screening of Ligand

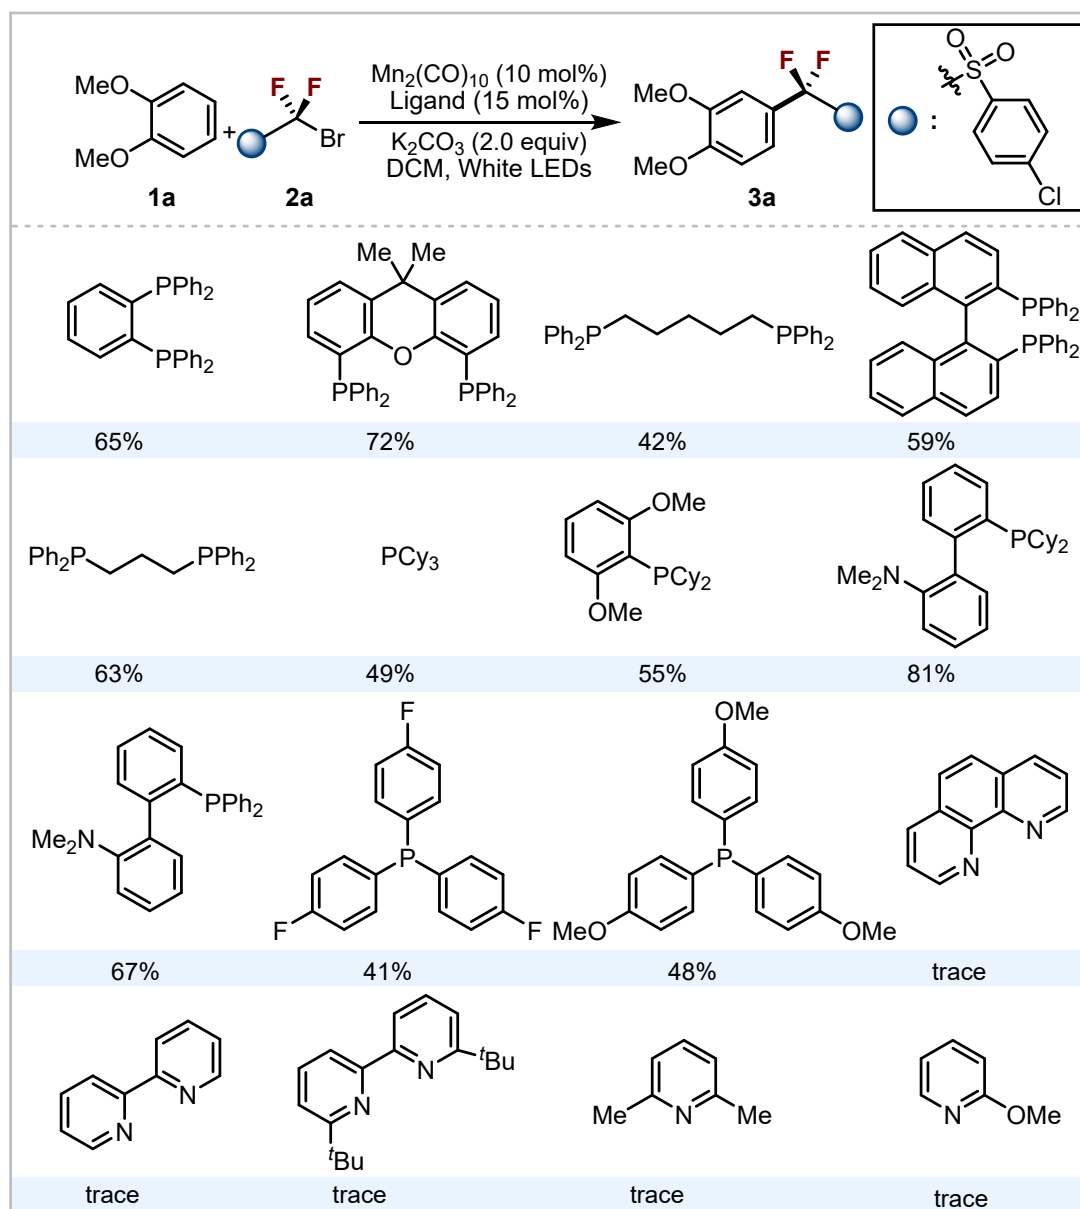

<sup>a</sup> Standard condition: **1a** (0.2 mmol), **2a** (0.6 mmol),  $\text{Mn}_2(\text{CO})_{10}$  (10 mmol%),  $\text{K}_2\text{CO}_3$  (2 equiv), Ligand (15 mmol%), DCE (2 mL), 40 °C, 36 h. <sup>b</sup> Yield were based on GC analysis using tridecane as an internal standard. **2a**: *p*-ClPhSO<sub>2</sub>CF<sub>2</sub>Br.

## 5. Screening of Solvent

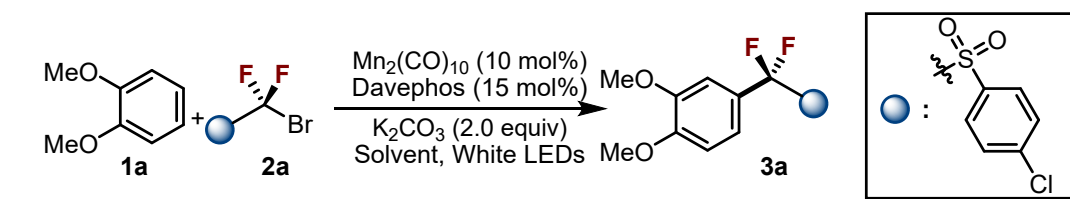

| Entry | Solvent         | Yield (%) |
|-------|-----------------|-----------|
| 1     | DCE             | 72        |
| 2     | DCM             | 81        |
| 3     | $\text{CCl}_4$  | -         |
| 4     | $\text{CHCl}_3$ | 65        |
| 5     | MeCN            | 48        |
| 6     | DMF             | 54        |
| 7     | 1,4-Dioxane     | 45        |
| 8     | MeOH            | 51        |
| 9     | MTBE            | 45        |

<sup>a</sup> Standard condition: **1a** (0.2 mmol), **2a** (0.6 mmol),  $\text{Mn}_2(\text{CO})_{10}$  (10 mmol%),  $\text{K}_2\text{CO}_3$  (2 equiv), DavePhos (15 mmol%), Solvent (2 mL), 40 °C, 36 h. <sup>b</sup> Yield were based on GC analysis using tridecane as an internal standard. **2a**:  $p\text{-ClPhSO}_2\text{CF}_2\text{Br}$ .

## 6. Synthetic Application

### 6.1 Reductive desulfonylation reaction <sup>1</sup>

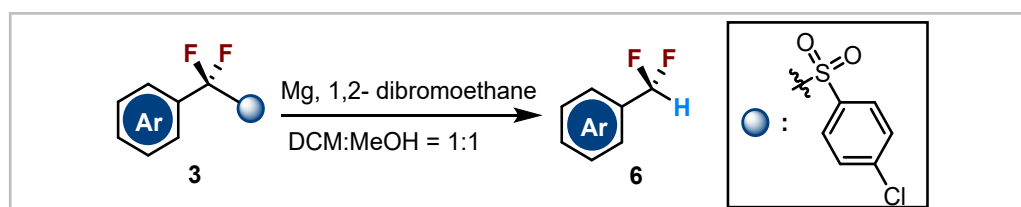

A suspension of magnesium turnings (120 mg, 5 mmol) in MeOH (3 mL) was treated with dibromoethane (10  $\mu\text{L}$ ) in MeOH (3 mL), and the mixture was stirred for a few minutes until evolution of  $\text{H}_2$  started. And then, the solution of **3** (0.2 mmol) in DCM (5 mL) was added dropwise, and the mixture was stirred for 3 h at r. t. The solvent was evaporated, and the residue was treated with saturated aqueous  $\text{NH}_4\text{Cl}$ , extracted with EA (10 mL) for 3 times. The organic layers was dried by anhydrous  $\text{Na}_2\text{SO}_4$ . The solvent

was evaporated, and the residue was purified by flash column chromatography to afford the corresponding product **6**.

## 6.2 Synthesis of aryldifluoromethyl ether <sup>4</sup>

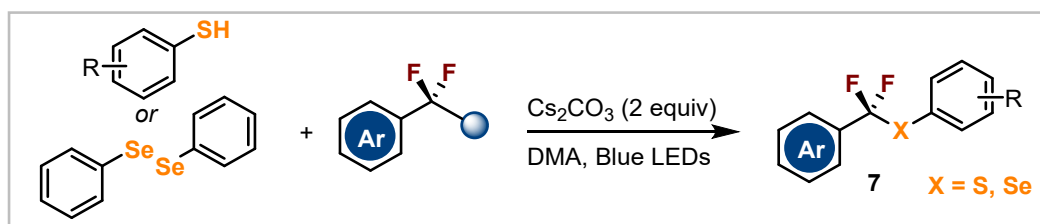

A mixture of **3** (0.24 mmol, 1.2 equiv), arylthiols or diphenyl diselenide (0.2 mmol),  $\text{Cs}_2\text{CO}_3$  (2 equiv), DMA (2 mL) in a 15 mL glass vial sealed at r. t under Blue LEDs irradiation for 24 h. The reaction mixture cooled to room temperature and concentrated in vacuo. The resulting residue was purified by column chromatography on silica gel to give the product **7**.

## 7. Gram-scale synthesis

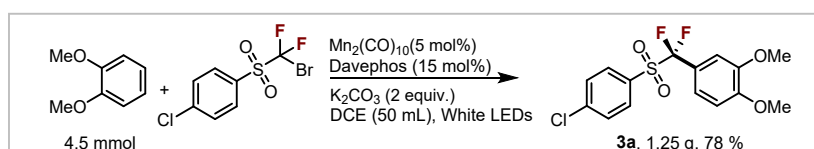

To an oven-dried 100 mL sealed flask,  $\text{Mn}_2(\text{CO})_{10}$  (5 mol%), DavePhos (15 mol%),  $\text{K}_2\text{CO}_3$  (2 equiv.), 1,2-dimethoxybenzene (5 mmol), 1-(bromodifluoromethyl)sulfonyl-4-chlorobenzene (3 equiv.), DCE (50 mL) were added and the flask was backfilled with nitrogen. The resulting reaction mixture was vigorously stirred under the irradiation of white LEDs (distance app. 4.0 cm from the bulb) at 40 °C for 48 h. After the reaction finished, the solvent was removed under vacuum, and the resulting residue was purified by flash column chromatography to afford the corresponding product in 1.25 g, 78% yield.

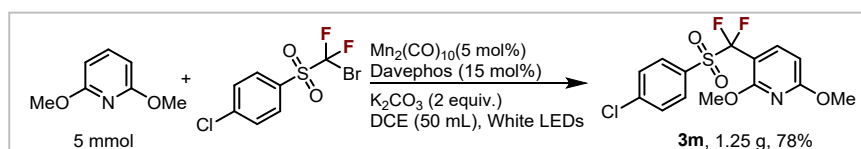

To an oven-dried 100 mL sealed flask,  $\text{Mn}_2(\text{CO})_{10}$  (5 mol%), DavePhos (15 mol%),  $\text{K}_2\text{CO}_3$  (2 equiv.), 2,6-dimethoxypyridine (5 mmol), 1-(bromodifluoromethyl)sulfonyl-4-chlorobenzene (3 equiv.), DCE (50 mL) were added and the flask was backfilled with nitrogen. The resulting reaction mixture was vigorously stirred under the irradiation of white LEDs (distance app. 4.0 cm from the bulb) at 40 °C for 48 h. After the reaction finished, the solvent was removed under vacuum, and the resulting residue was purified by flash column chromatography to afford the corresponding product in 1.25 g, 78% yield.

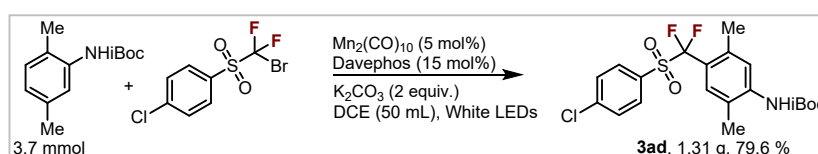

To an oven-dried 100 mL sealed flask,  $\text{Mn}_2(\text{CO})_{10}$  (5 mol%), DavePhos (15 mol%),  $\text{K}_2\text{CO}_3$  (2 equiv.), isobutyl (2,5-dimethylphenyl) carbamate (5 mmol), 1-((bromodifluoromethyl)sulfonyl)-4-chlorobenzene (3 equiv.), DCE (50 mL) were added and the flask was backfilled with nitrogen. The resulting reaction mixture was vigorously stirred under the irradiation of white LEDs (distance app. 4.0 cm from the bulb) at 40 °C for 48 h. After the reaction finished, the solvent was removed under vacuum, and the resulting residue was purified by flash column chromatography to afford the corresponding product in 1.31 g, 79.6 % yield.

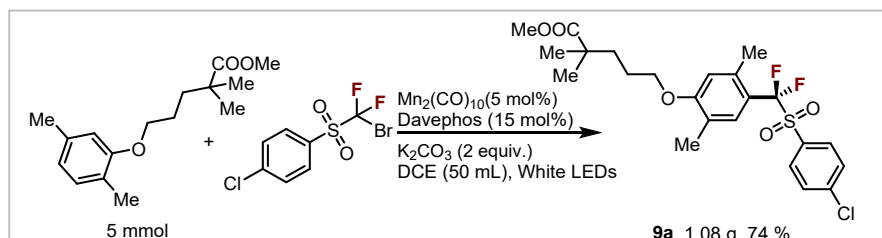

To an oven-dried 100 mL sealed flask,  $\text{Mn}_2(\text{CO})_{10}$  (5 mol%), DavePhos (15 mol%),  $\text{K}_2\text{CO}_3$  (2 equiv.), Gemfibrozil-ester (5 mmol), 1-((bromodifluoromethyl)sulfonyl)-4-chlorobenzene (3 equiv.), DCE (50 mL) were added and the flask was backfilled with nitrogen. The resulting reaction mixture was vigorously stirred under the irradiation of white LEDs (distance app. 4.0 cm from the bulb) at 40 °C for 48 h. After the reaction finished, the solvent was removed under vacuum, and the resulting residue was purified by flash column chromatography to afford the corresponding product in 1.08 g, 74 % yield.

## 8. Synthesis of Mn complex <sup>5</sup>

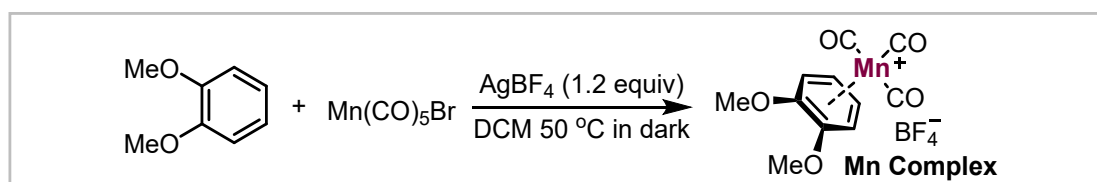

$[\text{Mn}(\text{CO})_3(1,2\text{-dimethoxybenzene})]\text{BF}_4$  was prepared by a modified procedure.<sup>5</sup>  $\text{Mn}(\text{CO})_5\text{Br}$  (1.0 g) and  $\text{AgBF}_4$  (1.1 equiv) were dissolved in 50 mL of  $\text{CH}_2\text{Cl}_2$  and refluxed for 2 h under  $\text{N}_2$  in the dark. The 1,2-dimethoxybenzene (2 equiv) in 10 mL of  $\text{CH}_2\text{Cl}_2$  was then added and the reaction mixture refluxed overnight. After it was cooled to room temperature, the solution was filtered through Celite and concentrated to ca. 20 mL in vacuo and the product precipitated with diethyl ether. The Yellow  $[\text{Mn}(\text{CO})_3(1,2\text{-dimethoxybenzene})]\text{BF}_4$  salts were washed repeatedly with ether and dried in vacuo. Yellow solid.





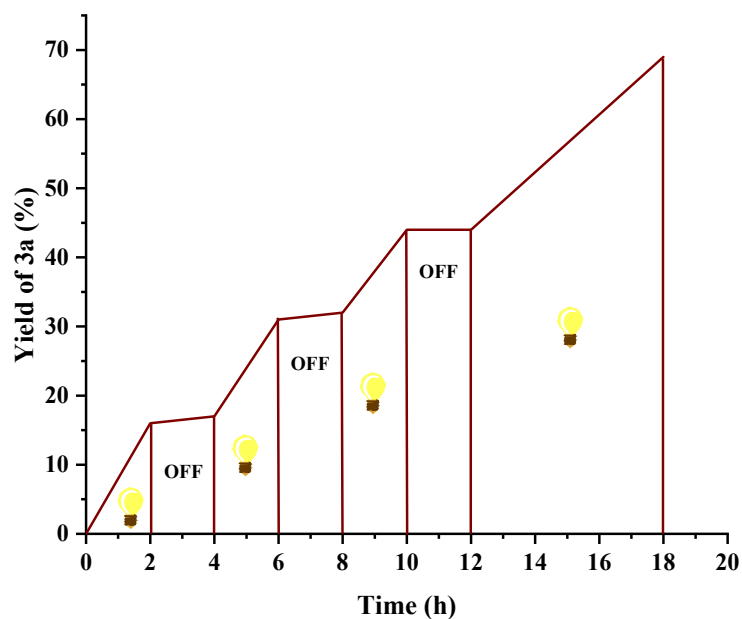

## 11. KIE experiments

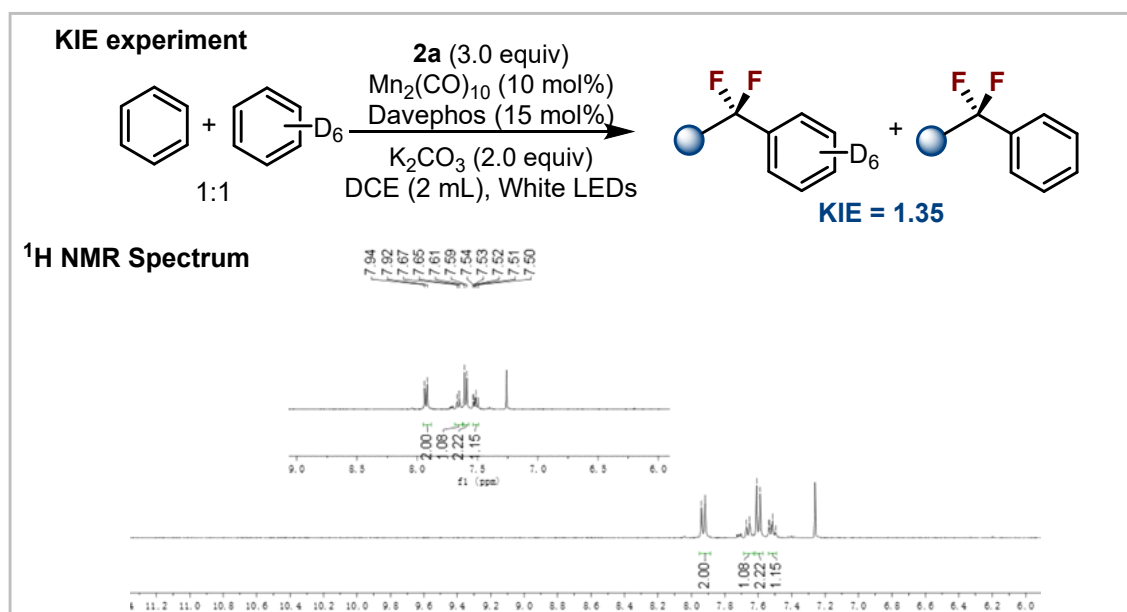

## 12. General Procedure for difluoromethylation of arenes

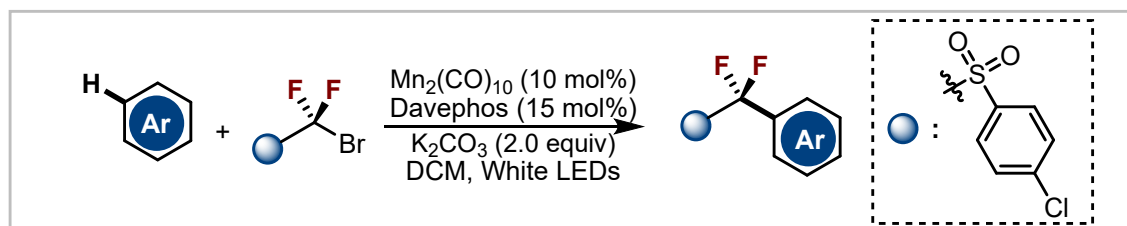

A mixture of Arenes (**1**, 0.2 mmol), bromofluoromethyl reagent (**2**, 0.2 mmol),  $\text{Mn}_2(\text{CO})_{10}$  (10 mol%),  $\text{K}_2\text{CO}_3$  (0.4 mol, 2 equiv), DavePhos (15 mol%) and DCM (2 mL) in a 15 mL glass vial sealed was heated at 40 °C under white LEDs irradiation for 36 hours. The reaction mixture cooled to room temperature and concentrated in vacuo. The resulting residue was purified by column chromatography on silica gel to give the product.

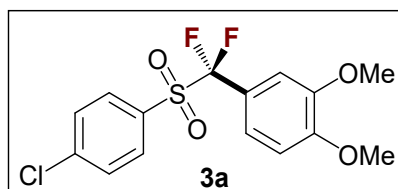

**4-(((4-chlorophenyl)sulfonyl)difluoromethyl)-1,2-dimethoxybenzene, (3a), Yield: 81%**

$^1\text{H NMR}$  (400 MHz,  $\text{CDCl}_3$ )  $\delta$  7.88 (d,  $J = 8.5$  Hz, 2H), 7.54 (d,  $J = 8.6$  Hz, 2H), 7.20 (dd,  $J = 8.5, 1.8$  Hz, 1H), 7.06 (d,  $J = 1.9$  Hz, 1H), 6.92 (d,  $J = 8.5$  Hz, 1H), 3.87 (d,  $J = 4.4$  Hz, 6H).

$^{19}\text{F NMR}$  (377 MHz,  $\text{CDCl}_3$ )  $\delta$  -100.7.

$^{13}\text{C NMR}$  (101 MHz,  $\text{CDCl}_3$ )  $\delta$  152.5, 149.0, 142.2, 132.2, 131.4, 129.7, 122.0 (t,  $J_{\text{C-F}} = 287.3$  Hz), 121.4 (t,  $J_{\text{C-F}} = 6.5$  Hz), 117.9 (t,  $J_{\text{C-F}} = 22.8$  Hz), 110.8, 110.2 (t,  $J_{\text{C-F}} = 5.9$  Hz), 56.1, 56.0.

**HRMS** Calcd for  $\text{C}_{15}\text{H}_{13}\text{ClF}_2\text{O}_4\text{S}$  [ $\text{M}+\text{Na}^+$ ]: 385.0083; Found: 385.0075.

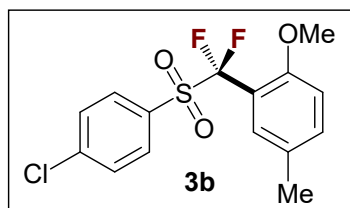

**2-(((4-chlorophenyl)sulfonyl)difluoromethyl)-1-methoxy-4-methylbenzene, (3b), Yield: 59%**

$^1\text{H NMR}$  (400 MHz,  $\text{CDCl}_3$ )  $\delta$  7.87 (d,  $J = 8.6$  Hz, 2H), 7.55 (d,  $J = 8.7$  Hz, 2H), 7.30 (d,  $J = 7.9$  Hz, 2H), 6.85 (d,  $J = 8.2$  Hz, 1H), 3.70 (s, 3H), 2.32 (s, 3H).

$^{19}\text{F NMR}$  (377 MHz,  $\text{CDCl}_3$ )  $\delta$  -97.0.

$^{13}\text{C NMR}$  (101 MHz,  $\text{CDCl}_3$ )  $\delta$  156.7, 143.3, 142.0, 132.4, 132.3, 131.2, 129.4, 127.0 (t,  $J_{\text{C-F}} = 7.8$  Hz), 122.7 (t,  $J_{\text{C-F}} = 289.2$  Hz), 114.2 (t,  $J_{\text{C-F}} = 20.1$  Hz), 112.4, 56.2, 34.3, 31.4.

**HRMS** Calcd for  $\text{C}_{15}\text{H}_{13}\text{ClF}_2\text{O}_3\text{S}$  [ $\text{M}+\text{Na}^+$ ]: 369.0134; Found: 369.0141.

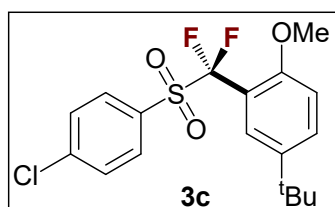

**4-(tert-butyl)-2-(((4-chlorophenyl)sulfonyl)difluoromethyl)-1-methoxybenzene, (3c), Yield: 63%**

$^1\text{H NMR}$  (400 MHz,  $\text{CDCl}_3$ )  $\delta$  7.85 (d,  $J = 8.5$  Hz, 2H), 7.58 – 7.48 (m, 3H), 7.41 (d,  $J = 2.5$  Hz, 1H), 6.90 (d,  $J = 8.8$  Hz, 1H), 3.74 (s, 3H), 1.28 (s, 9H).

$^{19}\text{F NMR}$  (377 MHz,  $\text{CDCl}_3$ )  $\delta$  -97.2.

$^{13}\text{C NMR}$  (101 MHz,  $\text{CDCl}_3$ )  $\delta$  156.7, 143.3, 142.0, 132.4, 132.3, 131.2, 129.5, 127.0 (t,  $J_{\text{C-F}} = 7.8$  Hz), 122.7 (t,  $J_{\text{C-F}} = 289.2$  Hz), 114.2 (t,  $J_{\text{C-F}} = 20.1$  Hz), 112.4, 56.2, 34.3, 31.4.

HRMS Calcd for C<sub>18</sub>H<sub>19</sub>ClF<sub>2</sub>O<sub>3</sub>S [M+Na<sup>+</sup>]: 411.0604; Found: 411.0597.

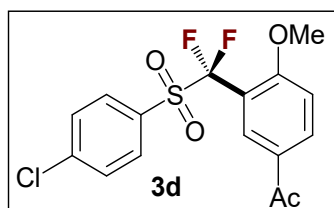

**1-(3-(((4-chlorophenyl)sulfonyl)difluoromethyl)-4-methoxyphenyl)ethan-1-one, (3d), Yield: 48%**

<sup>1</sup>H NMR (400 MHz, CDCl<sub>3</sub>) δ 8.15 (dd, *J* = 8.8, 2.2 Hz, 1H), 8.11 (d, *J* = 2.2 Hz, 1H), 7.90 (d, *J* = 8.6 Hz, 2H), 7.58 (d, *J* = 8.7 Hz, 2H), 7.04 (d, *J* = 8.8 Hz, 1H), 3.86 (s, 3H), 2.58 (s, 3H).

<sup>19</sup>F NMR (377 MHz, CDCl<sub>3</sub>) δ -97.3.

<sup>13</sup>C NMR (101 MHz, CDCl<sub>3</sub>) δ 195.6, 162.4, 142.4, 134.7, 132.3, 132.0, 131.3 (t, *J*<sub>C-F</sub> = 7.9 Hz), 130.0, 129.7, 122.1 (t, *J*<sub>C-F</sub> = 289.8 Hz), 115.1 (t, *J*<sub>C-F</sub> = 21.1 Hz), 112.4, 56.5, 26.4.

HRMS Calcd for C<sub>16</sub>H<sub>13</sub>ClF<sub>2</sub>O<sub>4</sub>S [M+Na<sup>+</sup>]: 397.0083; Found: 397.0091.

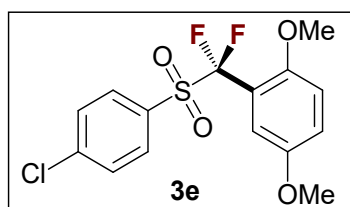

**2-(((4-chlorophenyl)sulfonyl)difluoromethyl)-1,4-dimethoxybenzene, (3e), Yield: 51%**

<sup>1</sup>H NMR (400 MHz, CDCl<sub>3</sub>) δ 7.87 (d, *J* = 8.6 Hz, 2H), 7.55 (d, *J* = 8.7 Hz, 2H), 7.05 (dt, *J* = 5.0, 3.0 Hz, 2H), 6.90 (d, *J* = 8.8 Hz, 1H), 3.78 (s, 3H), 3.69 (s, 3H).

<sup>19</sup>F NMR (377 MHz, CDCl<sub>3</sub>) δ -97.2.

<sup>13</sup>C NMR (101 MHz, CDCl<sub>3</sub>) δ 153.3, 153.0 (t, *J*<sub>C-F</sub> = 2.3 Hz), 142.1, 132.3, 132.3, 129.5, 122.3 (t, *J*<sub>C-F</sub> = 290.5 Hz), 120.0, 115.5 (t, *J*<sub>C-F</sub> = 20.6 Hz), 114.9 (t, *J*<sub>C-F</sub> = 8.2 Hz), 114.3, 56.8, 56.0.

HRMS Calcd for C<sub>15</sub>H<sub>13</sub>ClF<sub>2</sub>O<sub>4</sub>S [M+Na<sup>+</sup>]: 385.0083; Found: 385.0085.

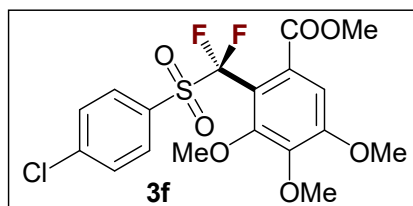

**methyl 2-(((4-chlorophenyl)sulfonyl)difluoromethyl)-3,4,5-trimethoxybenzoate, (3f), Yield: 44%**

<sup>1</sup>H NMR (400 MHz, CDCl<sub>3</sub>) δ 7.94 (d, *J* = 8.6 Hz, 2H), 7.56 (d, *J* = 8.6 Hz, 2H), 6.77 (s, 1H), 3.91 (s, 3H), 3.90 (s, 3H), 3.86 (s, 3H), 3.85 (s, 3H).

<sup>19</sup>F NMR (377 MHz, CDCl<sub>3</sub>) δ -87.0.

<sup>13</sup>C NMR (101 MHz, CDCl<sub>3</sub>) δ 168.3, 156.6, 153.9 (t, *J*<sub>C-F</sub> = 3.5 Hz), 143.9, 141.9, 133.5, 132.1, 130.1 (t, *J*<sub>C-F</sub> = 4.0 Hz), 129.5, 122.9 (t, *J*<sub>C-F</sub> = 292.2 Hz), 112.4 (t, *J*<sub>C-F</sub> = 20.5 Hz), 107.5, 62.0, 61.0, 56.4, 53.0.

HRMS Calcd for C<sub>18</sub>H<sub>17</sub>ClF<sub>2</sub>O<sub>7</sub>S [M+Na<sup>+</sup>]: 473.0244; Found: 473.0252.

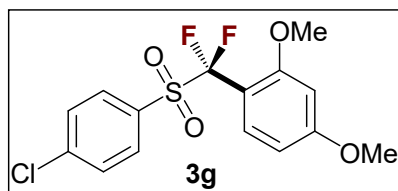

**1-(((4-chlorophenyl)sulfonyl)difluoromethyl)-2,4-dimethoxybenzene, (3g), Yield: 70%**

$^1\text{H NMR}$  (400 MHz,  $\text{CDCl}_3$ )  $\delta$  7.86 (d,  $J = 8.5$  Hz, 2H), 7.54 (d,  $J = 8.6$  Hz, 2H), 7.42 (d,  $J = 8.8$  Hz, 1H), 6.55 (d,  $J = 8.6$  Hz, 1H), 6.45 (s, 1H), 3.83 (s, 3H), 3.70 (s, 3H).

$^{19}\text{F NMR}$  (377 MHz,  $\text{CDCl}_3$ )  $\delta$  -96.6.

$^{13}\text{C NMR}$  (101 MHz,  $\text{CDCl}_3$ )  $\delta$  164.6, 160.3, 141.9, 132.3, 131.6 (t,  $J_{\text{C-F}} = 7.9$  Hz), 129.4, 122.8 (t,  $J_{\text{C-F}} = 288.7$  Hz), 107.1 (t,  $J_{\text{C-F}} = 21.3$  Hz), 105.1, 99.5, 56.0, 55.7.

**HRMS** Calcd for  $\text{C}_{15}\text{H}_{13}\text{ClF}_2\text{O}_4\text{S}$  [ $\text{M}+\text{Na}^+$ ]: 385.0083; Found: 385.0079.

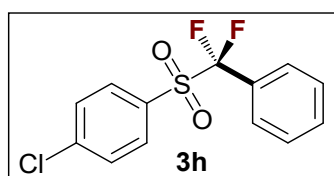

**1-chloro-4-((difluoro(phenyl)methyl)sulfonyl)benzene, (3h), Yield: 43%**

$^1\text{H NMR}$  (400 MHz,  $\text{CDCl}_3$ )  $\delta$  7.93 (d,  $J = 8.7$  Hz, 2H), 7.66 (d,  $J = 7.6$  Hz, 2H), 7.60 (d,  $J = 8.7$  Hz, 3H), 7.51 (t,  $J = 7.6$  Hz, 2H).

$^{19}\text{F NMR}$  (377 MHz,  $\text{CDCl}_3$ )  $\delta$  -101.8.

$^{13}\text{C NMR}$  (101 MHz,  $\text{CDCl}_3$ )  $\delta$  142.5, 132.6, 132.3, 132.1, 131.2, 130.1, 130.0, 128.6, 127.8 (t,  $J_{\text{C-F}} = 6.1$  Hz), 126.3 (t,  $J_{\text{C-F}} = 22.0$  Hz), 121.8 (t,  $J_{\text{C-F}} = 286.3$  Hz).

**HRMS** Calcd for  $\text{C}_{13}\text{H}_9\text{ClF}_2\text{O}_2\text{S}$  [ $\text{M}+\text{Na}^+$ ]: 324.9872; Found: 324.9879.

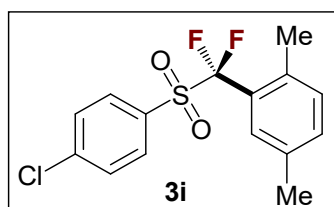

**2-(((4-chlorophenyl)sulfonyl)difluoromethyl)-1,4-dimethylbenzene, (3i), Yield: 48%**

$^1\text{H NMR}$  (400 MHz,  $\text{CDCl}_3$ )  $\delta$  7.97 (d,  $J = 8.6$  Hz, 2H), 7.63 (d,  $J = 8.6$  Hz, 2H), 7.35 (s, 1H), 7.28 (d,  $J = 7.8$  Hz, 1H), 7.20 (d,  $J = 7.8$  Hz, 1H), 2.56 (t,  $J = 3.4$  Hz, 3H), 2.38 (s, 3H).

$^{19}\text{F NMR}$  (377 MHz,  $\text{CDCl}_3$ )  $\delta$  -95.8.

$^{13}\text{C NMR}$  (101 MHz,  $\text{CDCl}_3$ )  $\delta$  156.9, 156.2, 156.2, 153.5, 153.1, 123.6, 117.1, 117.1, 113.9, 113.9, 56.7, 56.1.

**HRMS** Calcd for  $\text{C}_{15}\text{H}_{13}\text{ClF}_2\text{O}_2\text{S}$  [ $\text{M}+\text{Na}^+$ ]: 353.0185; Found: 353.0190.

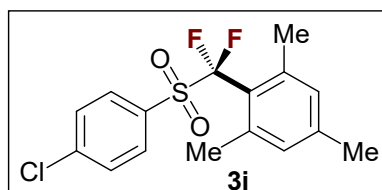

**2-(((4-chlorophenyl)sulfonyl)difluoromethyl)-1,3,5-trimethylbenzene, (3j), Yield: 46%**

<sup>1</sup>H NMR (400 MHz, CDCl<sub>3</sub>) δ 7.90 (d, *J* = 8.6 Hz, 2H), 7.53 (d, *J* = 8.7 Hz, 2H), 6.87 (s, 2H), 2.48 (t, *J* = 5.0 Hz, 6H), 2.22 (s, 3H).

<sup>19</sup>F NMR (377 MHz, CDCl<sub>3</sub>) δ -87.4.

<sup>13</sup>C NMR (101 MHz, CDCl<sub>3</sub>) δ 142.3, 142.2, 140.8 (t, *J*<sub>C-F</sub> = 3.1 Hz), 132.3, 131.9, 129.8, 125.3 (t, *J*<sub>C-F</sub> = 290.1 Hz), 120.5 (t, *J*<sub>C-F</sub> = 18.5 Hz), 22.5 (t, *J*<sub>C-F</sub> = 6.6 Hz), 21.1.

HRMS Calcd for C<sub>16</sub>H<sub>15</sub>ClF<sub>2</sub>O<sub>2</sub>S [M+Na<sup>+</sup>]: 367.0342; Found: 367.0331 .

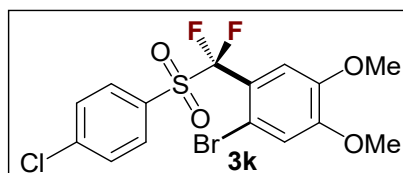

**1-Bromo-2-(((4-chlorophenyl)sulfonyl)difluoromethyl)-4,5-dimethoxybenzene, (3k), Yield: 55%.**

<sup>1</sup>H NMR (400 MHz, CDCl<sub>3</sub>) δ 7.95 (d, *J* = 8.6 Hz, 2H), 7.62 (d, *J* = 8.6 Hz, 2H), 7.14 (s, 1H), 7.08 (s, 1H), 3.95 (s, 3H), 3.92 (s, 3H).

<sup>19</sup>F NMR (377 MHz, CDCl<sub>3</sub>) δ -96.1.

<sup>13</sup>C NMR (101 MHz, CDCl<sub>3</sub>) δ 152.4, 148.2, 142.6, 132.5, 131.5, 129.9, 121.6 (t, *J* = 288.5 Hz), 118.0, 117.5 (t, *J* = 21.4 Hz), 113.3 (t, *J* = 7.6 Hz), 56.5, 56.4.

HRMS Calcd for C<sub>15</sub>H<sub>12</sub>ClBrF<sub>2</sub>O<sub>4</sub>S [M+Na<sup>+</sup>]: 462.9194; Found: 462.9201.

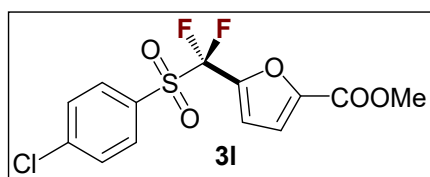

**methyl 5-(((4-chlorophenyl)sulfonyl)difluoromethyl)furan-2-carboxylate, (3l), Yield: 86%**

<sup>1</sup>H NMR (400 MHz, CDCl<sub>3</sub>) δ 7.87 (d, *J* = 8.7 Hz, 2H), 7.67 – 7.48 (m, 2H), 7.26 – 7.14 (m, 1H), 7.00 (d, *J* = 3.7 Hz, 1H), 3.86 (s, 3H).

<sup>19</sup>F NMR (377 MHz, CDCl<sub>3</sub>) δ -102.5.

<sup>13</sup>C NMR (101 MHz, CDCl<sub>3</sub>) δ 158.1, 148.0, 143.2, 142.4 (t, *J* = 31.5 Hz), 132.4, 130.7, 130.1, 118.4, 117.2, 116.6 (t, *J*<sub>C-F</sub> = 287.1 Hz), 52.6.

HRMS Calcd for C<sub>14</sub>H<sub>12</sub>F<sub>2</sub>O<sub>5</sub>S [M+Na<sup>+</sup>]: 353.0266; Found: 353.0270.

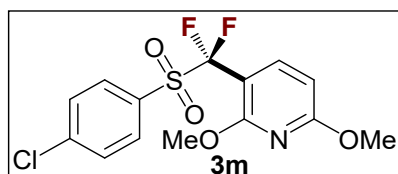

**3-(((4-chlorophenyl)sulfonyl)difluoromethyl)-2,6-dimethoxypyridine, (3m), Yield: 85%**

<sup>1</sup>H NMR (400 MHz, CDCl<sub>3</sub>) δ 7.90 (d, *J* = 8.7 Hz, 2H), 7.69 (d, *J* = 8.4 Hz, 1H), 7.57 (d, *J* = 8.7 Hz, 2H), 6.39 (d, *J* = 8.4 Hz, 1H), 3.95 (s, 3H), 3.87 (s, 3H).

<sup>19</sup>F NMR (377 MHz, CDCl<sub>3</sub>) δ -98.2.

$^{13}\text{C}$  NMR (101 MHz,  $\text{CDCl}_3$ )  $\delta$  166.0, 161.6, 142.2, 141.9 (t,  $J_{\text{C-F}} = 6.7$  Hz), 132.3, 132.1, 129.6, 122.2 (t,  $J_{\text{C-F}} = 288.0$  Hz), 102.1, 99.9 (t,  $J_{\text{C-F}} = 23.3$  Hz), 54.1, 54.0.

HRMS Calcd for  $\text{C}_{14}\text{H}_{12}\text{ClF}_2\text{NO}_4\text{S}$  [ $\text{M}+\text{Na}^+$ ]: 386.0036; Found: 386.0044.

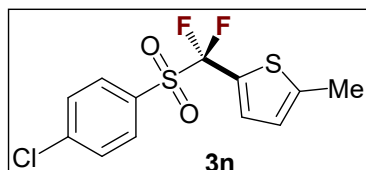

**2-(((4-chlorophenyl)sulfonyl)difluoromethyl)-5-methylthiophene, (3n), Yield: 64%**

$^1\text{H}$  NMR (400 MHz,  $\text{CDCl}_3$ )  $\delta$  7.96 (d,  $J = 8.6$  Hz, 2H), 7.62 (d,  $J = 8.6$  Hz, 2H), 7.36 (d,  $J = 3.7$  Hz, 1H), 6.85 (dd,  $J = 2.3, 1.1$  Hz, 1H), 2.57 (d,  $J = 0.9$  Hz, 3H).

$^{19}\text{F}$  NMR (377 MHz,  $\text{CDCl}_3$ )  $\delta$  -92.5.

$^{13}\text{C}$  NMR (101 MHz,  $\text{CDCl}_3$ )  $\delta$  147.5, 142.5, 132.6 (t,  $J_{\text{C-F}} = 5.4$  Hz), 132.4, 129.9, 120.7 (t,  $J_{\text{C-F}} = 286.1$  Hz), 126.4, 123.6 (t,  $J_{\text{C-F}} = 27.3$  Hz), 15.6.

HRMS Calcd for  $\text{C}_{12}\text{H}_9\text{ClF}_2\text{O}_2\text{S}_2$  [ $\text{M}+\text{Na}^+$ ]: 344.9593; Found: 344.9587.

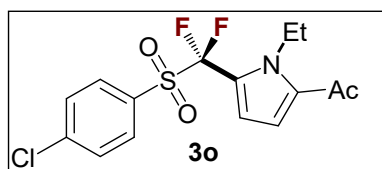

**1-(5-(((4-Chlorophenyl)sulfonyl)difluoromethyl)-1-ethyl-1H-pyrrol-2-yl)ethan-1-one, (3o), Yield: 71%.**

$^1\text{H}$  NMR (400 MHz,  $\text{CDCl}_3$ )  $\delta$  7.88 (d,  $J = 8.5$  Hz, 2H), 7.69 – 7.51 (m, 2H), 6.92 (d,  $J = 4.2$  Hz, 1H), 6.51 (d,  $J = 4.3$  Hz, 1H), 4.14 (s, 3H), 3.83 (s, 3H).

$^{19}\text{F}$  NMR (377 MHz,  $\text{CDCl}_3$ )  $\delta$  -96.4.

$^{13}\text{C}$  NMR (101 MHz,  $\text{CDCl}_3$ )  $\delta$  161.1, 142.7, 132.2, 131.2, 129.9, 128.3, 123.3 (t,  $J_{\text{C-F}} = 28.5$  Hz), 119.4 (t,  $J_{\text{C-F}} = 286.4$  Hz), 116.9, 115.1 (t,  $J_{\text{C-F}} = 5.2$  Hz), 51.7, 34.8.

HRMS (ESI) Calcd for  $\text{C}_{15}\text{H}_{14}\text{ClF}_2\text{NO}_3\text{S}$  [ $\text{M}+\text{Na}^+$ ]: 384.0249; Found: 384.0255.

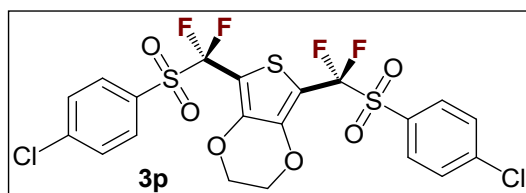

**5,7-bis(((4-chlorophenyl)sulfonyl)difluoromethyl)-2,3-dihydrothieno[3,4-b][1,4]dioxine, (3p), Yield: 74%.**

$^1\text{H}$  NMR (400 MHz,  $\text{CDCl}_3$ )  $\delta$  8.00 – 7.88 (m, 4H), 7.69 – 7.54 (m, 4H), 4.28 (s, 4H).

$^{19}\text{F}$  NMR (377 MHz,  $\text{CDCl}_3$ )  $\delta$  -94.9.

$^{13}\text{C}$  NMR (101 MHz,  $\text{CDCl}_3$ )  $\delta$  143.7, 142.9, 132.5, 131.0 (t,  $J_{\text{C-F}} = 118.52$  Hz), 130.0, 120.1 (t,  $J_{\text{C-F}} = 288.5$  Hz), 106.0 (t,  $J_{\text{C-F}} = 29.8$  Hz), 64.7.

HRMS Calcd for  $\text{C}_{20}\text{H}_{12}\text{Cl}_2\text{F}_4\text{O}_6\text{S}_3$  [ $\text{M}+\text{Na}^+$ ]: 612.9001; Found: 612.9013.

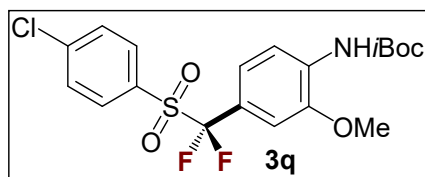

**isobutyl 4-(((4-chlorophenyl)sulfonyl)difluoromethyl)-2-methoxyphenyl)carbamate, (3q), Yield: 75%**

$^1\text{H NMR}$  (400 MHz,  $\text{CDCl}_3$ )  $\delta$  8.26 (d,  $J = 8.4$  Hz, 1H), 7.91 (d,  $J = 8.6$  Hz, 2H), 7.59 (d,  $J = 8.7$  Hz, 2H), 7.40 (s, 1H), 7.22 (dd,  $J = 8.6, 1.6$  Hz, 1H), 7.10 (d,  $J = 1.7$  Hz, 1H), 3.98 (d,  $J = 6.7$  Hz, 2H), 3.93 (s, 3H), 0.98 (d,  $J = 6.7$  Hz, 6H).

$^{19}\text{F NMR}$  (377 MHz,  $\text{CDCl}_3$ )  $\delta$  -101.0.

$^{13}\text{C NMR}$  (101 MHz,  $\text{CDCl}_3$ )  $\delta$  153.3, 147.1, 142.3, 132.2, 132.0, 131.4, 129.7, 121.5 (t,  $J_{\text{C-F}} = 6.4$  Hz), 121.4 (t,  $J_{\text{C-F}} = 287.4$  Hz), 119.5 (t,  $J_{\text{C-F}} = 22.83$  Hz), 117.3, 109.0 (t,  $J_{\text{C-F}} = 6.1$  Hz), 71.7, 56.0, 27.9, 19.1.

**HRMS** Calcd for  $\text{C}_{19}\text{H}_{20}\text{ClF}_2\text{NO}_5\text{S}$  [ $\text{M}+\text{Na}^+$ ]: 470.0611; Found: 470.0615.

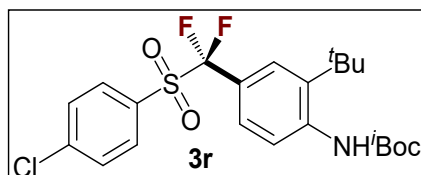

**isobutyl (2-(tert-butyl)-4-(((4-chlorophenyl)sulfonyl)difluoromethyl)phenyl)carbamate, (3r), Yield: 64%**

$^1\text{H NMR}$  (400 MHz,  $\text{CDCl}_3$ )  $\delta$  7.97 (dd,  $J = 14.5, 8.4$  Hz, 1H), 7.90 (d,  $J = 8.5$  Hz, 2H), 7.57 (d,  $J = 8.6$  Hz, 2H), 7.52 (d,  $J = 9.1$  Hz, 2H), 6.83 (s, 1H), 3.98 (d,  $J = 6.7$  Hz, 2H), 2.07 – 1.93 (m, 1H), 1.43 (s, 9H), 0.96 (d,  $J = 6.7$  Hz, 6H).

$^{19}\text{F NMR}$  (377 MHz,  $\text{CDCl}_3$ )  $\delta$  -101.4.

$^{13}\text{C NMR}$  (101 MHz,  $\text{CDCl}_3$ )  $\delta$  153.7, 142.4, 140.1, 132.4, 131.6, 129.8, 126.8 (t,  $J_{\text{C-F}} = 6.0$  Hz), 126.2 (t,  $J_{\text{C-F}} = 6.1$  Hz), 122.1 (t,  $J_{\text{C-F}} = 287.34$  Hz), 121.6 (t,  $J_{\text{C-F}} = 22.1$  Hz), 71.9, 34.6, 30.5, 28.1, 19.1.

**HRMS** Calcd for  $\text{C}_{22}\text{H}_{26}\text{ClF}_2\text{NO}_4\text{S}$  [ $\text{M}+\text{Na}^+$ ]: 496.1131; Found: 496.1139.

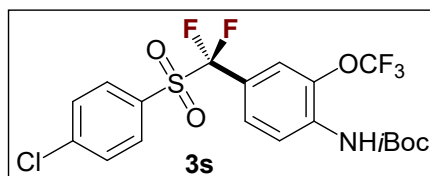

**Isobutyl 4-(((4-chlorophenyl)sulfonyl)difluoromethyl)-2-(trifluoromethoxy)phenyl)carbamate, (3s), Yield: 67%**

$^1\text{H NMR}$  (400 MHz,  $\text{CDCl}_3$ )  $\delta$  8.45 (d,  $J = 8.8$  Hz, 1H), 7.92 (d,  $J = 8.6$  Hz, 2H), 7.66 – 7.56 (m, 3H), 7.51 (s, 1H), 7.12 (s, 1H), 4.01 (d,  $J = 6.7$  Hz, 2H), 2.02 (dp,  $J = 13.4, 6.7$  Hz, 1H), 0.99 (d,  $J = 6.7$  Hz, 6H).

$^{19}\text{F NMR}$  (377 MHz,  $\text{CDCl}_3$ )  $\delta$  -57.7, -101.6.



$^{13}\text{C}$  NMR (101 MHz,  $\text{CDCl}_3$ )  $\delta$  152.9, 142.8, 137.0, 135.1, 132.4, 131.1, 130.0, 127.6 (t,  $J_{\text{C-F}} = 6.0$  Hz), 120.6 (t,  $J_{\text{C-F}} = 23.6$  Hz), 120.3 (t,  $J_{\text{C-F}} = 5.6$  Hz), 119.8, 72.4, 28.0, 19.1.

HRMS Calcd for  $\text{C}_{19}\text{H}_{17}\text{ClF}_5\text{NO}_5\text{S}$  [ $\text{M}+\text{Na}^+$ ]: 524.0328; Found: 524.0340.

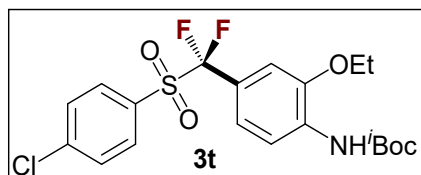

**Isobutyl (4-(((4-chlorophenyl)sulfonyl)difluoromethyl)-2-ethoxyphenyl)carbamate, (3t), Yield: 48%.**

$^1\text{H}$  NMR (400 MHz,  $\text{CDCl}_3$ )  $\delta$  8.24 (s, 1H), 7.90 (d,  $J = 7.0$  Hz, 2H), 7.58 (d,  $J = 7.2$  Hz, 2H), 7.39 (s, 1H), 7.20 (d,  $J = 7.5$  Hz, 1H), 7.08 (s, 1H), 4.16 (d,  $J = 6.1$  Hz, 2H), 3.98 (d,  $J = 5.2$  Hz, 2H), 2.02 (d,  $J = 8.7$  Hz, 1H), 1.48 (s, 3H), 0.98 (d,  $J = 5.5$  Hz, 6H).

$^{19}\text{F}$  NMR (377 MHz,  $\text{CDCl}_3$ )  $\delta$  -101.1.

$^{13}\text{C}$  NMR (101 MHz,  $\text{CDCl}_3$ )  $\delta$  153.4, 146.5, 142.4, 132.3, 132.1, 131.5, 129.8, 121.3 (t,  $J_{\text{C-F}} = 6.4$  Hz), 119.6 (t,  $J_{\text{C-F}} = 22.7$  Hz), 117.4, 110.0 (t,  $J_{\text{C-F}} = 6.1$  Hz), 71.8, 64.8, 28.1, 19.2, 14.7.

HRMS (ESI) Calcd for  $\text{C}_{20}\text{H}_{22}\text{ClF}_2\text{NO}_5\text{S}$  [ $\text{M}+\text{Na}^+$ ]: 484.0773; Found: 484.0781.

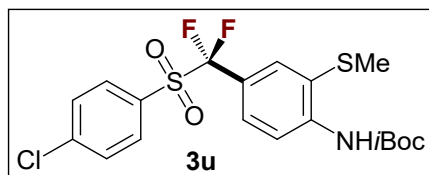

**isobutyl (4-(((4-chlorophenyl)sulfonyl)difluoromethyl)-2-(methylthio)phenyl)carbamate, (3u), Yield: 43%.**

$^1\text{H}$  NMR (400 MHz,  $\text{CDCl}_3$ )  $\delta$  8.33 (d,  $J = 8.7$  Hz, 1H), 7.93 (d,  $J = 8.6$  Hz, 3H), 7.75 (d,  $J = 1.9$  Hz, 1H), 7.60 (d,  $J = 8.6$  Hz, 2H), 7.56 (dd,  $J = 8.8, 1.9$  Hz, 1H), 4.00 (d,  $J = 6.7$  Hz, 2H), 2.41 (s, 3H), 2.07-1.97 (m,  $J = 13.4, 6.7$  Hz, 1H), 0.99 (d,  $J = 6.7$  Hz, 6H).

$^{19}\text{F}$  NMR (377 MHz,  $\text{CDCl}_3$ )  $\delta$  -101.5.

$^{13}\text{C}$  NMR (101 MHz,  $\text{CDCl}_3$ )  $\delta$  153.4, 142.7, 142.6, 132.8 (t,  $J_{\text{C-F}} = 6.0$  Hz), 132.4, 131.4, 129.9, 128.9 (t,  $J_{\text{C-F}} = 5.9$  Hz), 124.8, 121.6 (t,  $J_{\text{C-F}} = 287.7$  Hz), 120.5 (t,  $J_{\text{C-F}} = 23.0$  Hz), 118.2, 72.0, 28.1, 19.2, 19.1.

HRMS Calcd for  $\text{C}_{19}\text{H}_{20}\text{ClF}_2\text{NO}_4\text{S}_2$  [ $\text{M}+\text{Na}^+$ ]: 486.0383; Found: 486.0393.

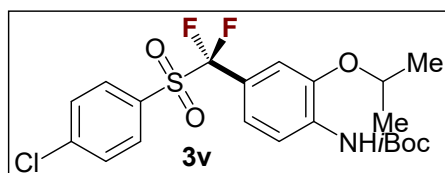

**isobutyl (4-(((4-chlorophenyl)sulfonyl)difluoromethyl)-2-isopropoxyphenyl)carbamate, (3v), Yield: 61%.**

$^1\text{H}$  NMR (400 MHz,  $\text{CDCl}_3$ )  $\delta$  8.25 (d,  $J = 8.2$  Hz, 1H), 7.90 (d,  $J = 8.5$  Hz, 2H), 7.58 (d,  $J = 8.6$  Hz, 2H), 7.38 (s, 1H), 7.18 (d,  $J = 8.6$  Hz, 1H), 7.10 (d,  $J = 1.5$  Hz, 1H), 4.66 (dt,  $J = 12.1, 6.1$  Hz, 1H), 3.98 (d,  $J = 6.7$  Hz, 2H), 2.01 (dp,  $J = 13.4, 6.7$  Hz, 1H), 1.40 (d,  $J = 6.1$  Hz, 6H), 0.98 (d,  $J = 6.7$  Hz, 6H).

$^{19}\text{F}$  NMR (377 MHz,  $\text{CDCl}_3$ )  $\delta$  -101.2.

$^{13}\text{C}$  NMR (101 MHz,  $\text{CDCl}_3$ )  $\delta$  153.4, 145.3, 142.4, 132.3, 131.5, 129.8, 122.0 (t,  $J_{\text{C-F}} = 287.5$  Hz), 121.1 (t,  $J_{\text{C-F}} = 6.4$  Hz), 119.5 (t,  $J_{\text{C-F}} = 22.7$  Hz), 117.6, 111.5 (t,  $J_{\text{C-F}} = 6.0$  Hz), 71.9, 71.8, 28.1, 22.0, 19.2.  
HRMS Calcd for  $\text{C}_{21}\text{H}_{24}\text{ClF}_2\text{NO}_5\text{S}$  [ $\text{M}+\text{Na}^+$ ]: 498.0924; Found: 498.0933.

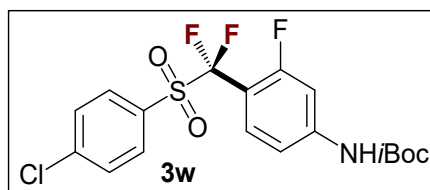

isobutyl 4-(((4-chlorophenyl)sulfonyl)difluoromethyl)-3-fluorophenylcarbamate, (**3w**), Yield: 49%

$^1\text{H}$  NMR (400 MHz,  $\text{CDCl}_3$ )  $\delta$  7.94 (d,  $J = 8.6$  Hz, 2H), 7.60 (d,  $J = 8.6$  Hz, 2H), 7.48 (dd,  $J = 19.8, 11.3$  Hz, 2H), 7.15 (d,  $J = 8.6$  Hz, 1H), 7.08 (s, 1H), 3.98 (d,  $J = 6.6$  Hz, 2H), 1.94 - 2.01 (m, 1H), 0.96 (d,  $J = 6.7$  Hz, 6H).

$^{19}\text{F}$  NMR (377 MHz,  $\text{CDCl}_3$ )  $\delta$  -99.0 (d,  $J_{\text{C-F}} = 22.7$  Hz), -108.6 (d,  $J_{\text{C-F}} = -6.11$  Hz).

$^{13}\text{C}$  NMR (101 MHz,  $\text{CDCl}_3$ )  $\delta$  161.5 (d,  $J_{\text{C-F}} = 257.2$  Hz), 153.1, 144.4 (d,  $J_{\text{C-F}} = 11.6$  Hz), 142.7, 132.4, 131.2, 130.7 (t,  $J_{\text{C-F}} = 6.8$  Hz), 129.9, 121.4 (t,  $J_{\text{C-F}} = 289.9$  Hz), 113.5 (d,  $J_{\text{C-F}} = 2.8$  Hz), 106.6 (d,  $J_{\text{C-F}} = 27.2$  Hz), 72.1, 28.0, 19.1.

HRMS Calcd for  $\text{C}_{18}\text{H}_{17}\text{ClF}_3\text{NO}_4\text{S}$  [ $\text{M}+\text{Na}^+$ ]: 458.0411; Found: 458.0420.

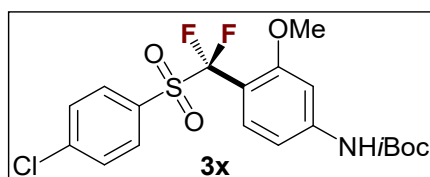

isobutyl 4-(((4-chlorophenyl)sulfonyl)difluoromethyl)-3-methoxyphenylcarbamate, (**3x**), Yield: 65%

$^1\text{H}$  NMR (400 MHz,  $\text{CDCl}_3$ )  $\delta$  7.87 (d,  $J = 8.6$  Hz, 2H), 7.55 (d,  $J = 8.7$  Hz, 2H), 7.39 (d,  $J = 8.5$  Hz, 2H), 7.00 (s, 1H), 6.81 (dd,  $J = 8.6, 1.8$  Hz, 1H), 3.96 (d,  $J = 6.7$  Hz, 2H), 3.70 (s, 3H), 2.06 - 1.84 (m, 1H), 0.96 (d,  $J = 6.7$  Hz, 6H).

$^{19}\text{F}$  NMR (377 MHz,  $\text{CDCl}_3$ )  $\delta$  -97.0.

$^{13}\text{C}$  NMR (101 MHz,  $\text{CDCl}_3$ )  $\delta$  159.9, 153.4, 143.9, 142.1, 132.4, 132.3, 130.9 (t,  $J_{\text{C-F}} = 7.9$  Hz), 129.5, 122.6 (t,  $J_{\text{C-F}} = 288.7$  Hz), 109.8, 108.8 (t,  $J_{\text{C-F}} = 21.3$  Hz), 102.1, 71.9, 56.0, 28.0, 19.1.

HRMS Calcd for  $\text{C}_{19}\text{H}_{20}\text{ClF}_2\text{NO}_5\text{S}$  [ $\text{M}+\text{Na}^+$ ]: 470.0611; Found: 470.0613.

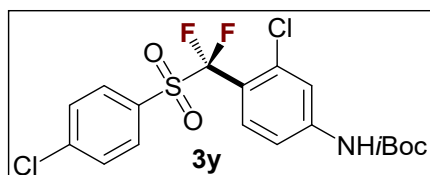

isobutyl 3-chloro-4-(((4-chlorophenyl)sulfonyl)difluoromethyl)phenylcarbamate, (**3y**), Yield: 44%

$^1\text{H}$  NMR (400 MHz,  $\text{CDCl}_3$ )  $\delta$  7.93 (d,  $J = 8.6$  Hz, 2H), 7.69 - 7.53 (m, 4H), 7.39 (d,  $J = 8.8$  Hz, 1H), 6.92 (s, 1H), 3.98 (d,  $J = 6.6$  Hz, 2H), 2.05 - 1.92 (m, 1H), 0.97 (d,  $J = 6.7$  Hz, 6H).

$^{19}\text{F}$  NMR (377 MHz,  $\text{CDCl}_3$ )  $\delta$  -96.5.

$^{13}\text{C}$  NMR (101 MHz,  $\text{CDCl}_3$ )  $\delta$  153.0, 142.8, 142.6, 135.0, 132.3, 131.9 (t,  $J_{\text{C-F}} = 7.7$  Hz), 131.4, 129.8, 121.6 (t,  $J_{\text{C-F}} = 290.3$  Hz), 120.8, 118.1 (t,  $J_{\text{C-F}} = 21.5$  Hz), 115.9, 72.0, 27.9, 19.0.

HRMS Calcd for C<sub>18</sub>H<sub>17</sub>Cl<sub>2</sub>F<sub>2</sub>NO<sub>4</sub>S [M+Na<sup>+</sup>]: 474.0116; Found: 474.0129.

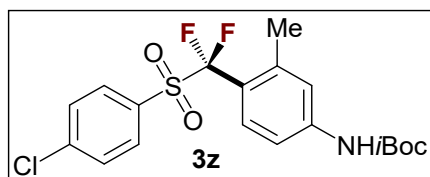

**Isobutyl (4-(((4-chlorophenyl)sulfonyl)difluoromethyl)-3-methylphenyl)carbamate, (3z), Yield: 44%.**

<sup>1</sup>H NMR (400 MHz, CDCl<sub>3</sub>) δ 7.93 (d, *J* = 8.6 Hz, 2H), 7.63 – 7.54 (m, 2H), 7.43 (d, *J* = 9.0 Hz, 1H), 7.33 (d, *J* = 7.9 Hz, 2H), 6.90 (s, 1H), 3.97 (d, *J* = 6.6 Hz, 2H), 2.54 (t, *J* = 3.2 Hz, 3H), 1.98 (m, 1.93-2.03, 1H), 0.96 (d, *J* = 6.7 Hz, 6H).

<sup>19</sup>F NMR (377 MHz, CDCl<sub>3</sub>) δ -95.5.

<sup>13</sup>C NMR (101 MHz, CDCl<sub>3</sub>) δ 153.4, 142.4, 141.9, 140.7, 132.3, 131.7, 130.9 (t, *J*<sub>C-F</sub> = 8.3 Hz), 129.8, 123.5 (t, *J*<sub>C-F</sub> = 291.6 Hz), 121.5, 118.6 (t, *J*<sub>C-F</sub> = 20.7 Hz), 115.4, 71.8, 28.0, 21.0, 19.1.

HRMS Calcd for C<sub>19</sub>H<sub>20</sub>ClF<sub>2</sub>NO<sub>4</sub>S [M+Na<sup>+</sup>]: 454.0662; Found: 454.0671.

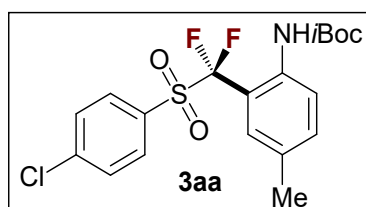

**isobutyl (2-(((4-chlorophenyl)sulfonyl)difluoromethyl)-4-methylphenyl)carbamate, (3aa), Yield: 58%.**

<sup>1</sup>H NMR (400 MHz, CDCl<sub>3</sub>) δ 7.94 (d, *J* = 8.5 Hz, 2H), 7.85 (dd, *J* = 7.7, 4.6 Hz, 1H), 7.65 (s, 1H), 7.61 (d, *J* = 8.7 Hz, 2H), 7.37 (d, *J* = 8.4 Hz, 1H), 3.96 (d, *J* = 6.7 Hz, 2H), 2.33 (s, 3H), 2.07 – 1.92 (m, 1H), 0.97 (d, *J* = 6.7 Hz, 6H).

<sup>19</sup>F NMR (377 MHz, CDCl<sub>3</sub>) δ -99.1.

<sup>13</sup>C NMR (101 MHz, CDCl<sub>3</sub>) δ 154.3, 143.0, 135.0, 134.4, 134.3, 132.3, 130.8, 130.0, 129.5 (t, *J*<sub>C-F</sub> = 8.2 Hz), 122.5 (t, *J*<sub>C-F</sub> = 288.3 Hz), 71.7, 28.1, 20.8, 19.1.

HRMS Calcd for C<sub>19</sub>H<sub>20</sub>ClF<sub>2</sub>NO<sub>4</sub>S [M+Na<sup>+</sup>]: 454.0662; Found: 454.0650.

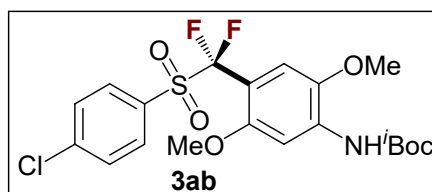

**Isobutyl (4-(((4-chlorophenyl)sulfonyl)difluoromethyl)-2,5-dimethoxyphenyl)carbamate, (3ab), Yield: 80%.**

<sup>1</sup>H NMR (400 MHz, CDCl<sub>3</sub>) δ 7.92 (s, 1H), 7.83 (d, *J* = 8.5 Hz, 2H), 7.52 (d, *J* = 8.6 Hz, 2H), 7.42 (s, 1H), 6.91 (s, 1H), 3.95 (d, *J* = 6.7 Hz, 2H), 3.84 (s, 3H), 3.65 (s, 3H), 2.11 – 1.87 (m, 1H), 0.96 (d, *J* = 6.8 Hz, 6H).

<sup>19</sup>F NMR (377 MHz, CDCl<sub>3</sub>) δ -96.9.

$^{13}\text{C}$  NMR (101 MHz,  $\text{CDCl}_3$ )  $\delta$  153.9, 153.4, 141.9, 140.9, 133.2, 132.4, 132.3, 129.4, 122.5 (t,  $J_{\text{C-F}} = 288.9$  Hz), 110.8 (t,  $J_{\text{C-F}} = 8.1$  Hz), 106.8 (t,  $J_{\text{C-F}} = 21.3$  Hz), 102.9, 71.8, 56.5, 56.4, 28.0, 19.1.

HRMS (ESI) Calcd for  $\text{C}_{20}\text{H}_{22}\text{ClF}_2\text{NO}_6\text{S}$  [ $\text{M}+\text{Na}^+$ ]: 500.0722; Found: 500.0709.

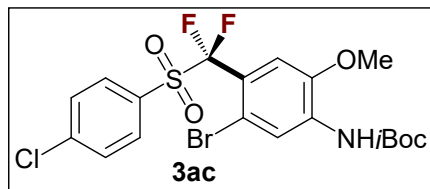

isobutyl (5-bromo-4-(((4-chlorophenyl)sulfonyl)difluoromethyl)-2-methoxyphenyl)carbamate, (3ac), Yield: 48%.

$^1\text{H}$  NMR (400 MHz,  $\text{CDCl}_3$ )  $\delta$  8.50 (s, 1H), 7.91 (d,  $J = 8.5$  Hz, 2H), 7.59 (d,  $J = 8.6$  Hz, 2H), 7.34 (s, 1H), 7.07 (s, 1H), 3.99 (d,  $J = 6.7$  Hz, 2H), 3.92 (s, 3H), 2.09 – 1.90 (m, 1H), 0.98 (d,  $J = 6.7$  Hz, 6H).

$^{19}\text{F}$  NMR (377 MHz,  $\text{CDCl}_3$ )  $\delta$  -96.3.

$^{13}\text{C}$  NMR (101 MHz,  $\text{CDCl}_3$ )  $\delta$  153.1, 146.1, 142.7, 132.5, 131.5, 129.9, 123.8, 118.8 (t,  $J_{\text{C-F}} = 21.4$  Hz), 113.8 (t,  $J_{\text{C-F}} = 2.4$  Hz), 112.1 (t,  $J_{\text{C-F}} = 8.0$  Hz), 72.1, 56.3, 28.0, 19.2.

HRMS Calcd for  $\text{C}_{19}\text{H}_{19}\text{BrClF}_2\text{NO}_5\text{S}$  [ $\text{M}+\text{Na}^+$ ]: 547.9716 ; Found: 547.9717.

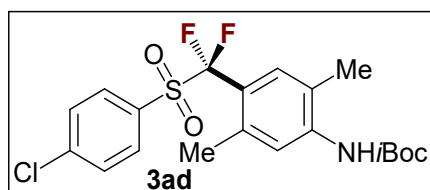

isobutyl (4-(((4-chlorophenyl)sulfonyl)difluoromethyl)-2,5-dimethylphenyl)carbamate, (3ad), Yield: 73%.

$^1\text{H}$  NMR (400 MHz,  $\text{CDCl}_3$ )  $\delta$  7.95 (s, 1H), 7.93 (d,  $J = 8.6$  Hz, 2H), 7.58 (d,  $J = 8.6$  Hz, 2H), 7.30 (s, 1H), 6.58 (s, 1H), 3.97 (d,  $J = 6.7$  Hz, 3H), 2.52 (t,  $J = 3.2$  Hz, 4H), 2.23 (s, 4H), 2.11 – 1.89 (m, 2H), 0.97 (d,  $J = 6.7$  Hz, 9H).

$^{19}\text{F}$  NMR (377 MHz,  $\text{CDCl}_3$ )  $\delta$  -95.4.

$^{13}\text{C}$  NMR (101 MHz,  $\text{CDCl}_3$ )  $\delta$  153.5, 142.3, 140.0, 138.6, 132.3, 131.8, 131.5 (t,  $J_{\text{C-F}} = 8.2$  Hz), 129.7, 123.5 (t,  $J_{\text{C-F}} = 288.9$  Hz), 123.3, 122.9, 118.6 (t,  $J_{\text{C-F}} = 20.4$  Hz), 71.9, 28.0, 20.8 (t,  $J_{\text{C-F}} = 4.3$  Hz), 19.2, 17.2.

HRMS Calcd for  $\text{C}_{20}\text{H}_{22}\text{ClF}_2\text{NO}_4\text{S}$  [ $\text{M}+\text{Na}^+$ ]: 468.0818; Found: 468.0820.

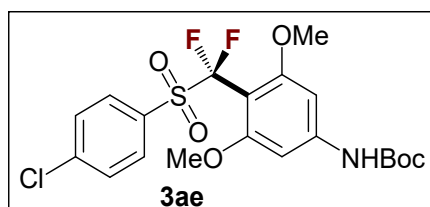

isobutyl (4-(((4-chlorophenyl)sulfonyl)difluoromethyl)-3,5-dimethoxyphenyl)carbamate, (3ae), Yield: 61%.

$^1\text{H}$  NMR (400 MHz,  $\text{CDCl}_3$ )  $\delta$  7.83 (d,  $J = 8.5$  Hz, 2H), 7.58 (s, 1H), 7.53 (d,  $J = 8.6$  Hz, 2H), 7.26 (s, 1H), 6.10 (d,  $J = 1.4$  Hz, 1H), 3.83 (s, 3H), 3.50 (s, 3H), 1.52 (s, 9H).

$^{19}\text{F}$  NMR (377 MHz,  $\text{CDCl}_3$ )  $\delta$  -93.4.

$^{13}\text{C}$  NMR (101 MHz,  $\text{CDCl}_3$ )  $\delta$  164.0, 161.1, 153.0, 142.4, 141.5, 132.4, 131.7, 129.5, 100.8, 95.6, 81.0, 56.1, 55.7, 28.4.

HRMS Calcd for  $\text{C}_{20}\text{H}_{22}\text{ClF}_2\text{NO}_6\text{S}$  [ $\text{M}+\text{Na}^+$ ]: 500.0717; Found: 500.0726.

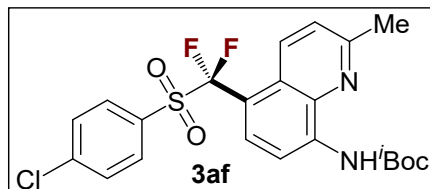

**Isobutyl (5-(((4-chlorophenyl)sulfonyl)difluoromethyl)-2-methylquinolin-8-yl)carbamate, (3af),**

**Yield: 51%**

$^1\text{H}$  NMR (400 MHz,  $\text{CDCl}_3$ )  $\delta$  9.52 (s, 1H), 8.61 (d,  $J = 8.8$  Hz, 1H), 8.45 (d,  $J = 8.0$  Hz, 1H), 7.94 (d,  $J = 8.4$  Hz, 2H), 7.70 (d,  $J = 8.4$  Hz, 1H), 7.60 (d,  $J = 8.5$  Hz, 2H), 7.45 (d,  $J = 8.9$  Hz, 1H), 4.06 (d,  $J = 6.7$  Hz, 2H), 2.76 (s, 3H), 2.16 – 1.99 (m, 2H), 1.03 (d,  $J = 6.7$  Hz, 6H).

$^{19}\text{F}$  NMR (377 MHz,  $\text{CDCl}_3$ )  $\delta$  -94.5.

$^{13}\text{C}$  NMR (101 MHz,  $\text{CDCl}_3$ )  $\delta$  166.8, 159.5, 156.6 (d,  $J_{\text{C-F}} = 2.1$  Hz), 153.8, 143.7, 143.7, 134.3, 129.7, 129.7, 129.2, 129.2, 127.8, 127.7, 117.4, 63.8, 33.3, 28.7 (t,  $J_{\text{C-F}} = 2.3$  Hz), 19.1, 19.1.

HRMS Calcd for  $\text{C}_{22}\text{H}_{21}\text{ClF}_2\text{N}_2\text{O}_4\text{S}$  [ $\text{M}+\text{Na}^+$ ]: 505.0771; Found: 505.0785.

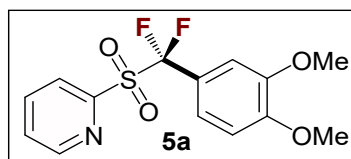

**2-(((3,4-dimethoxyphenyl)difluoromethyl)sulfonyl)pyridine, (5a), Yield: 72%.**

$^1\text{H}$  NMR (400 MHz,  $\text{CDCl}_3$ )  $\delta$  8.88 (dd,  $J = 4.6, 0.7$  Hz, 1H), 8.17 (d,  $J = 7.8$  Hz, 1H), 8.01 (td,  $J = 7.8, 1.7$  Hz, 1H), 7.65 (ddd,  $J = 7.6, 4.7, 1.0$  Hz, 1H), 7.29 (dd,  $J = 8.5, 1.9$  Hz, 1H), 7.16 (d,  $J = 1.9$  Hz, 1H), 6.96 (d,  $J = 8.5$  Hz, 1H), 3.92 (s, 3H), 3.90 (s, 3H).

$^{19}\text{F}$  NMR (377 MHz,  $\text{CDCl}_3$ )  $\delta$  -99.7.

$^{13}\text{C}$  NMR (101 MHz,  $\text{CDCl}_3$ )  $\delta$  152.8, 152.7, 151.0, 149.1, 138.3, 128.6, 126.7, 122.8 (t,  $J_{\text{C-F}} = 286.8$ ), 121.6 (t,  $J_{\text{C-F}} = 6.4$  Hz), 118.0 (t,  $J_{\text{C-F}} = 22.7$  Hz), 110.9, 110.4, 56.2, 56.2.

HRMS Calcd for  $\text{C}_{14}\text{H}_{13}\text{F}_2\text{NO}_4\text{S}$  [ $\text{M}+\text{Na}^+$ ]: 352.0426; Found: 352.0433.

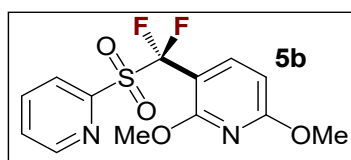

**3-(difluoro(pyridin-2-ylsulfonyl)methyl)-2,6-dimethoxy pyridine, (5b), Yield: 65%**

$^1\text{H}$  NMR (400 MHz,  $\text{CDCl}_3$ )  $\delta$  8.89 – 8.81 (m, 1H), 8.18 (d,  $J = 7.9$  Hz, 1H), 8.01 (td,  $J = 7.8, 1.7$  Hz, 1H), 7.74 (d,  $J = 8.4$  Hz, 1H), 7.64 (ddd,  $J = 7.6, 4.7, 1.0$  Hz, 1H), 6.40 (d,  $J = 8.4$  Hz, 1H), 3.96 (s, 3H), 3.89 (s, 3H).

$^{19}\text{F}$  NMR (377 MHz,  $\text{CDCl}_3$ )  $\delta$  -97.0.

$^{13}\text{C}$  NMR (101 MHz,  $\text{CDCl}_3$ )  $\delta$  166.1, 161.7, 153.4, 150.9, 141.9 (t,  $J_{\text{C-F}} = 6.7$  Hz), 138.2, 128.5, 126.7, 122.9 (t,  $J_{\text{C-F}} = 289.4$  Hz), 102.2, 100.1 (t,  $J_{\text{C-F}} = 23.0$  Hz), 54.1, 54.1.

HRMS Calcd for C<sub>13</sub>H<sub>12</sub>F<sub>2</sub>N<sub>2</sub>O<sub>4</sub>S [M+Na<sup>+</sup>]: 353.0378; Found: 353.0390.

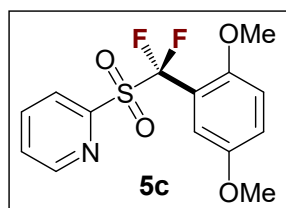

2-(((2,5-dimethoxyphenyl)difluoromethyl)sulfonyl)pyridine, (**5c**), Yield: 53%.

<sup>1</sup>H NMR (400 MHz, CDCl<sub>3</sub>) δ 8.85 (d, *J* = 3.9 Hz, 1H), 8.16 (d, *J* = 7.9 Hz, 1H), 8.00 (td, *J* = 7.8, 1.7 Hz, 1H), 7.63 (ddd, *J* = 7.6, 4.7, 0.9 Hz, 1H), 7.07 (dd, *J* = 12.5, 3.0 Hz, 2H), 6.92 (d, *J* = 8.7 Hz, 1H), 3.78 (s, 3H), 3.74 (s, 3H).

<sup>19</sup>F NMR (377 MHz, CDCl<sub>3</sub>) δ -95.8.

<sup>13</sup>C NMR (101 MHz, CDCl<sub>3</sub>) δ 153.5, 153.3, 153.1 (t, *J*<sub>C-F</sub> = 2.6 Hz), 150.8, 138.1, 128.4, 126.6, 123.0 (t, *J*<sub>C-F</sub> = 291.8 Hz), 120.2, 115.7 (t, *J*<sub>C-F</sub> = 20.5 Hz), 114.7 (t, *J*<sub>C-F</sub> = 8.3 Hz), 114.3, 56.9, 56.0.

HRMS Calcd for C<sub>14</sub>H<sub>13</sub>F<sub>2</sub>NO<sub>4</sub>S [M+Na<sup>+</sup>]: 352.0426; Found: 352.0433.

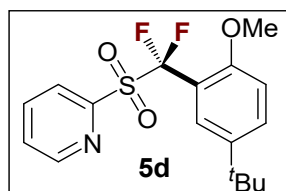

2-(((5-(tert-butyl)-2-methoxyphenyl)difluoromethyl)sulfonyl)pyridine, (**5d**), Yield: 49%

<sup>1</sup>H NMR (400 MHz, CDCl<sub>3</sub>) δ 8.84 (dd, *J* = 4.7, 0.8 Hz, 1H), 8.14 (d, *J* = 7.9 Hz, 1H), 7.99 (td, *J* = 7.8, 1.7 Hz, 1H), 7.62 (ddd, *J* = 7.6, 4.7, 1.0 Hz, 1H), 7.57 – 7.46 (m, 2H), 6.92 (d, *J* = 8.6 Hz, 1H), 3.79 (s, 3H), 1.29 (s, 9H).

<sup>19</sup>F NMR (377 MHz, CDCl<sub>3</sub>) δ -95.6.

<sup>13</sup>C NMR (101 MHz, CDCl<sub>3</sub>) δ 156.9, 153.6, 150.8, 143.3, 138.1, 131.3, 128.3, 126.9 (t, *J*<sub>C-F</sub> = 8.0 Hz), 126.6, 123.5 (t, *J*<sub>C-F</sub> = 290.5 Hz), 114.3 (t, *J*<sub>C-F</sub> = 20.0 Hz), 112.4, 56.3, 34.3, 31.4.

HRMS Calcd for C<sub>17</sub>H<sub>19</sub>F<sub>2</sub>NO<sub>3</sub>S [M+Na<sup>+</sup>]: 378.0946; Found: 378.0945.

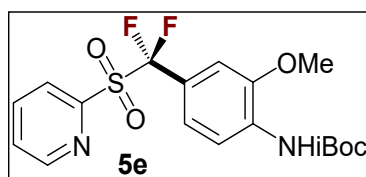

Isobutyl 4-(difluoro(pyridin-2-ylsulfonyl)methyl)-2-methoxyphenylcarbamate, (**5e**), Yield: 61%

<sup>1</sup>H NMR (400 MHz, CDCl<sub>3</sub>) δ 8.89 (d, *J* = 4.0 Hz, 1H), 8.27 (d, *J* = 8.3 Hz, 1H), 8.18 (d, *J* = 7.8 Hz, 1H), 8.03 (td, *J* = 7.8, 1.5 Hz, 1H), 7.67 (dd, *J* = 7.5, 4.7 Hz, 1H), 7.41 (s, 1H), 7.33 – 7.23 (m, 1H), 7.19 (s, 1H), 3.98 (d, *J* = 6.7 Hz, 2H), 3.94 (s, 3H), 2.12 – 1.84 (m, 1H), 0.98 (d, *J* = 6.7 Hz, 6H).

<sup>19</sup>F NMR (377 MHz, CDCl<sub>3</sub>) δ -100.0.

<sup>13</sup>C NMR (101 MHz, CDCl<sub>3</sub>) δ 153.4, 152.7, 151.0, 147.2, 138.3, 132.1, 128.7, 126.7, 122.7 (t, *J*<sub>C-F</sub> = 289.0 Hz), 121.5 (t, *J*<sub>C-F</sub> = 6.4 Hz), 119.5 (t, *J*<sub>C-F</sub> = 22.6 Hz), 117.4, 109.2 (t, *J*<sub>C-F</sub> = 6.1 Hz), 71.8, 56.1, 28.0, 19.1.

HRMS Calcd for C<sub>18</sub>H<sub>20</sub>F<sub>2</sub>N<sub>2</sub>O<sub>5</sub>S [M+Na<sup>+</sup>]: 437.0953; Found: 437.0960.

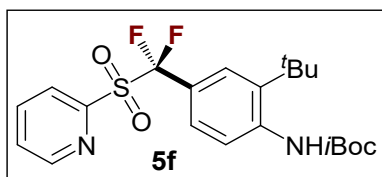

**Isobutyl (2-(tert-butyl)-4-(difluoro(pyridin-2-ylsulfonyl)methyl)phenyl)carbamate, (5f), Yield: 58%**

$^1\text{H NMR}$  (400 MHz,  $\text{CDCl}_3$ )  $\delta$  8.88 (d,  $J = 3.8$  Hz, 1H), 8.16 (d,  $J = 7.8$  Hz, 1H), 8.01 (td,  $J = 7.8, 1.6$  Hz, 2H), 7.66 (t,  $J = 5.6$  Hz, 2H), 7.56 (dd,  $J = 8.5, 1.7$  Hz, 1H), 6.82 (s, 1H), 3.98 (d,  $J = 6.7$  Hz, 2H), 2.06 – 1.92 (m, 1H), 1.44 (s, 9H), 0.96 (d,  $J = 6.7$  Hz, 6H).

$^{19}\text{F NMR}$  (377 MHz,  $\text{CDCl}_3$ )  $\delta$  -100.1.

$^{13}\text{C NMR}$  (101 MHz,  $\text{CDCl}_3$ )  $\delta$  153.7, 152.8, 151.0, 140.2, 138.3, 128.7, 126.8 (d,  $J_{\text{C-F}} = 8.5$  Hz), 126.8, 126.4 (t,  $J_{\text{C-F}} = 6.0$  Hz), 71.8, 34.6, 30.5, 28.1, 19.1.

**HRMS** Calcd for  $\text{C}_{21}\text{H}_{26}\text{F}_2\text{N}_2\text{O}_4\text{S}$  [ $\text{M}+\text{Na}^+$ ]: 463.1474; Found: 463.1482.

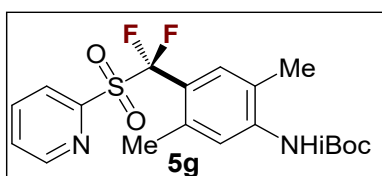

**Isobutyl (4-(difluoro(pyridin-2-ylsulfonyl)methyl)-2,5-dimethylphenyl)carbamate, (5g), Yield: 68%**

$^1\text{H NMR}$  (400 MHz,  $\text{CDCl}_3$ )  $\delta$  8.92 – 8.83 (m, 1H), 8.18 (d,  $J = 7.8$  Hz, 1H), 8.01 (td,  $J = 7.8, 1.6$  Hz, 1H), 7.95 (s, 1H), 7.65 (ddd,  $J = 7.6, 4.7, 0.9$  Hz, 1H), 7.37 (s, 1H), 6.57 (s, 1H), 3.96 (d,  $J = 6.7$  Hz, 2H), 2.56 (t,  $J = 3.1$  Hz, 3H), 2.24 (s, 3H), 2.12 – 1.91 (m, 1H), 0.96 (d,  $J = 6.7$  Hz, 6H).

$^{19}\text{F NMR}$  (377 MHz,  $\text{CDCl}_3$ )  $\delta$  -94.3.

$^{13}\text{C NMR}$  (101 MHz,  $\text{CDCl}_3$ )  $\delta$  153.5, 153.1, 151.0, 140.0, 138.7, 138.3, 131.6 (t,  $J_{\text{C-F}} = 8.3$  Hz), 128.6, 126.7, 124.3 (t,  $J_{\text{C-F}} = 290.6$  Hz), 123.3, 122.9, 118.7 (t,  $J_{\text{C-F}} = 20.1$  Hz), 71.9, 28.0, 20.8, 19.1, 17.2.

**HRMS** Calcd for  $\text{C}_{19}\text{H}_{22}\text{F}_2\text{N}_2\text{O}_4\text{S}$  [ $\text{M}+\text{Na}^+$ ]: 435.1166; Found: 435.1171.

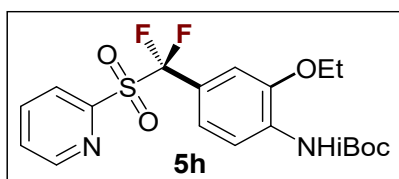

**Isobutyl (4-(difluoro(pyridin-2-ylsulfonyl)methyl)-2-ethoxyphenyl)carbamate, (5h), Yield: 56%.**

$^1\text{H NMR}$  (400 MHz,  $\text{CDCl}_3$ )  $\delta$  8.86 (dd,  $J = 4.6, 0.8$  Hz, 1H), 8.24 (d,  $J = 8.3$  Hz, 1H), 8.15 (d,  $J = 7.8$  Hz, 1H), 8.00 (td,  $J = 7.8, 1.7$  Hz, 1H), 7.64 (ddd,  $J = 7.6, 4.7, 1.0$  Hz, 1H), 7.37 (s, 1H), 7.24 (dd,  $J = 8.6, 1.4$  Hz, 1H), 7.16 (d,  $J = 1.6$  Hz, 1H), 4.16 (q,  $J = 7.0$  Hz, 2H), 3.97 (d,  $J = 6.7$  Hz, 2H), 2.00 (tq,  $J = 13.4, 6.7$  Hz, 1H), 1.47 (t,  $J = 7.0$  Hz, 3H), 0.97 (d,  $J = 6.7$  Hz, 6H).

$^{19}\text{F NMR}$  (377 MHz,  $\text{CDCl}_3$ )  $\delta$  -100.0.

$^{13}\text{C NMR}$  (101 MHz,  $\text{CDCl}_3$ )  $\delta$  153.4, 152.8, 151.0, 146.5, 138.3, 132.1, 128.6, 126.7, 122.7 (t,  $J_{\text{C-F}} = 288.9$  Hz), 121.3 (t,  $J_{\text{C-F}} = 6.4$  Hz), 119.5 (t,  $J_{\text{C-F}} = 22.4$  Hz), 117.4, 110.1 (t,  $J_{\text{C-F}} = 6.0$  Hz), 71.8, 64.8, 28.0, 19.2, 14.7.

**HRMS (ESI)** Calcd for  $\text{C}_{19}\text{H}_{22}\text{F}_2\text{N}_2\text{O}_5\text{S}$  [ $\text{M}+\text{Na}^+$ ]: 451.1115; Found: 451.1123.

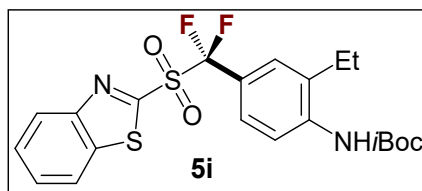

**Isobutyl (4-((benzo[d]thiazol-2-ylsulfonyl)difluoromethyl)-2-ethylphenyl)carbamate, (5i), Yield: 34%.**

**<sup>1</sup>H NMR** (400 MHz, CDCl<sub>3</sub>) δ 8.41 – 8.30 (m, 1H), 8.18 (d, *J* = 8.6 Hz, 1H), 8.10 – 8.00 (m, 1H), 7.65 (dddd, *J* = 17.6, 10.7, 7.9, 1.7 Hz, 3H), 7.53 (d, *J* = 1.8 Hz, 1H), 6.68 (s, 1H), 3.99 (d, *J* = 6.7 Hz, 2H), 2.63 (q, *J* = 7.5 Hz, 2H), 2.10 – 1.92 (m, 1H), 1.26 (t, *J* = 7.5 Hz, 3H), 0.98 (d, *J* = 6.7 Hz, 6H).

**<sup>19</sup>F NMR** (377 MHz, CDCl<sub>3</sub>) δ -99.1.

**<sup>13</sup>C NMR** (101 MHz, CDCl<sub>3</sub>) δ 159.7, 153.6, 153.1, 140.3, 138.4, 132.0, 128.8, 128.0 (t, *J*<sub>C-F</sub> = 5.9 Hz), 127.2 (t, *J*<sub>C-F</sub> = 6.0 Hz), 126.4, 122.4, 119.9 (t, *J*<sub>C-F</sub> = 11.0 Hz), 72.0, 28.0, 24.1, 19.2, 13.2.

**HRMS** Calcd for C<sub>21</sub>H<sub>22</sub>F<sub>2</sub>N<sub>2</sub>O<sub>4</sub>S<sub>2</sub> [M+Na<sup>+</sup>]: 491.0881; Found: 491.0890.

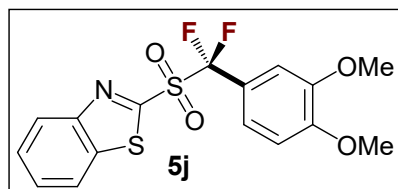

**2-(((3,4-dimethoxyphenyl)difluoromethyl)sulfonyl)benzo[d]thiazole, (5j), Yield: 41%**

**<sup>1</sup>H NMR** (400 MHz, CDCl<sub>3</sub>) δ 8.42 – 8.30 (m, 1H), 8.11 – 8.02 (m, 1H), 7.76 – 7.63 (m, 2H), 7.40 – 7.32 (m, 1H), 7.17 (d, *J* = 2.0 Hz, 1H), 6.99 (d, *J* = 8.5 Hz, 1H), 3.95 (s, 3H), 3.89 (s, 3H).

**<sup>19</sup>F NMR** (377 MHz, CDCl<sub>3</sub>) δ -98.7.

**<sup>13</sup>C NMR** (101 MHz, CDCl<sub>3</sub>) δ 159.7, 153.2, 153.1, 149.4, 138.4, 128.9, 128.1, 126.4, 122.4, 122.0 (t, *J*<sub>C-F</sub> = 6.5 Hz), 111.1, 110.4 (t, *J*<sub>C-F</sub> = 5.8 Hz), 56.3, 56.2.

**HRMS** Calcd for C<sub>16</sub>H<sub>13</sub>F<sub>2</sub>NO<sub>4</sub>S<sub>2</sub> [M+Na<sup>+</sup>]: 408.0146; Found: 408.0158.

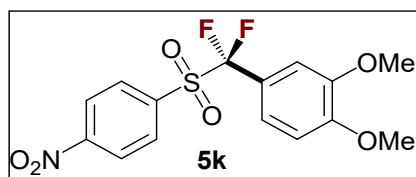

**4-(Difluoro((4-nitrophenyl)sulfonyl)methyl)-1,2-dimethoxybenzene, (5k), Yield: 55%**

**<sup>1</sup>H NMR** (400 MHz, CDCl<sub>3</sub>) δ 8.46 (d, *J* = 8.9 Hz, 2H), 8.23 (d, *J* = 8.8 Hz, 2H), 7.26 (dd, *J* = 8.4, 2.0 Hz, 1H), 7.14 (d, *J* = 2.0 Hz, 1H), 6.98 (d, *J* = 8.5 Hz, 1H), 3.95 (s, 3H), 3.94 (s, 3H).

**<sup>19</sup>F NMR** (377 MHz, CDCl<sub>3</sub>) δ -99.8.

**<sup>13</sup>C NMR** (101 MHz, CDCl<sub>3</sub>) δ 153.0, 151.9, 149.3, 139.2, 132.4, 124.4, 122.4 (t, *J*<sub>C-F</sub> = 288 Hz), 121.8 (t, *J*<sub>C-F</sub> = 6.5 Hz), 117.2 (t, *J*<sub>C-F</sub> = 22.6 Hz), 111.0, 110.4 (t, *J*<sub>C-F</sub> = 5.9 Hz), 56.3, 56.2.

**HRMS** Calcd for C<sub>15</sub>H<sub>13</sub>F<sub>2</sub>NO<sub>6</sub>S [M+Na<sup>+</sup>]: 396.0324; Found: 396.0330.

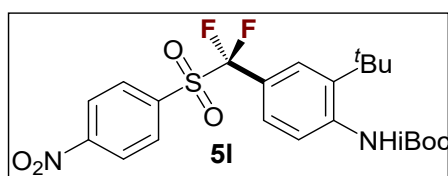



**Isobutyl 2-(tert-butyl)-4-(difluoro((4-nitrophenyl)sulfonyl)methyl)phenyl)carbamate, (5l), Yield: 47%.**

$^1\text{H NMR}$  (400 MHz,  $\text{CDCl}_3$ )  $\delta$  8.53 – 8.40 (m, 2H), 8.22 (d,  $J = 8.8$  Hz, 2H), 8.05 (d,  $J = 8.5$  Hz, 1H), 7.61 (d,  $J = 1.8$  Hz, 1H), 7.55 (dd,  $J = 8.6, 2.0$  Hz, 1H), 6.86 (s, 1H), 4.00 (d,  $J = 6.7$  Hz, 2H), 2.08 – 1.89 (m, 1H), 1.46 (s, 8H), 0.98 (d,  $J = 6.7$  Hz, 6H).

$^{19}\text{F NMR}$  (377 MHz,  $\text{CDCl}_3$ )  $\delta$  -100.3.

$^{13}\text{C NMR}$  (101 MHz,  $\text{CDCl}_3$ )  $\delta$  153.6, 151.9, 140.5, 139.2, 132.5, 127.0 (t,  $J_{\text{C-F}} = 6.0$  Hz), 126.3 (t,  $J_{\text{C-F}} = 6.2$  Hz), 124.4, 71.9, 34.6, 30.5, 28.1, 19.1.

**HRMS** Calcd for  $\text{C}_{22}\text{H}_{26}\text{F}_2\text{N}_2\text{O}_6\text{S}$  [ $\text{M}+\text{Na}^+$ ]: 507.1372; Found: 507.1384.

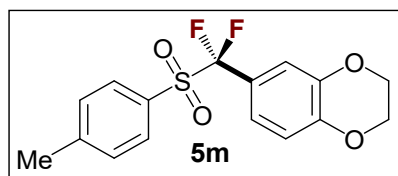

**6-(Difluoro(tosyl)methyl)-2,3-dihydrobenzo[b][1,4]dioxine, (5m), Yield: 53%.**

$^1\text{H NMR}$  (400 MHz,  $\text{CDCl}_3$ )  $\delta$  7.88 (d,  $J = 8.2$  Hz, 2H), 7.40 (d,  $J = 8.1$  Hz, 2H), 7.20 (d,  $J = 2.0$  Hz, 1H), 7.13 (dd,  $J = 8.5, 2.1$  Hz, 1H), 6.95 (d,  $J = 8.5$  Hz, 1H), 4.30 (td,  $J = 5.3, 2.1$  Hz, 4H), 2.49 (s, 3H).

$^{19}\text{F NMR}$  (377 MHz,  $\text{CDCl}_3$ )  $\delta$  -101.0.

$^{13}\text{C NMR}$  (101 MHz,  $\text{CDCl}_3$ )  $\delta$  147.3, 146.7, 143.7, 131.0, 130.1, 130.0, 121.4 (t,  $J_{\text{C-F}} = 6.3$  Hz), 117.7, 117.5 (t,  $J_{\text{C-F}} = 6.3$  Hz), 64.7, 64.3, 22.0.

**HRMS** Calcd for  $\text{C}_{16}\text{H}_{14}\text{F}_2\text{O}_4\text{S}$  [ $\text{M}+\text{Na}^+$ ]: 363.0473; Found: 363.0465.

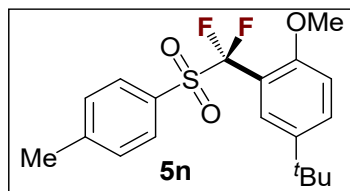

**4-(tert-butyl)-2-(difluoro(tosyl)methyl)-1-methoxybenzene, (5n), Yield: 51%**

$^1\text{H NMR}$  (400 MHz,  $\text{CDCl}_3$ )  $\delta$  7.79 (d,  $J = 8.2$  Hz, 2H), 7.50 (dd,  $J = 8.7, 2.5$  Hz, 1H), 7.37 (d,  $J = 2.5$  Hz, 1H), 7.34 (d,  $J = 8.1$  Hz, 2H), 6.90 (d,  $J = 8.8$  Hz, 1H), 3.74 (s, 3H), 2.45 (s, 3H), 1.27 (s, 9H).

$^{19}\text{F NMR}$  (377 MHz,  $\text{CDCl}_3$ )  $\delta$  -97.6.

$^{13}\text{C NMR}$  (101 MHz,  $\text{CDCl}_3$ )  $\delta$  156.8 (t,  $J_{\text{C-F}} = 2.1$  Hz), 146.2, 143.1, 130.9, 130.9 (t,  $J_{\text{C-F}} = 9.7$  Hz), 129.7, 127.0 (t,  $J_{\text{C-F}} = 7.8$  Hz), 122.7 (t,  $J_{\text{C-F}} = 288.8$  Hz), 114.7 (t,  $J_{\text{C-F}} = 20.1$  Hz), 112.4, 56.2, 34.2, 31.4, 21.8.

**HRMS** Calcd for  $\text{C}_{19}\text{H}_{22}\text{F}_2\text{O}_3\text{S}$  [ $\text{M}+\text{Na}^+$ ]: 391.1155; Found: 391.1149.

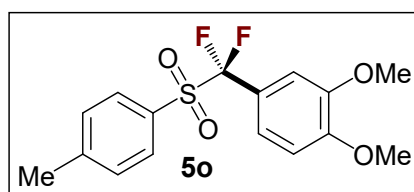

**4-(difluoro(tosyl)methyl)-1,2-dimethoxybenzene, (5o), Yield: 63%**

**<sup>1</sup>H NMR** (400 MHz, CDCl<sub>3</sub>) δ 7.85 (d, *J* = 8.2 Hz, 2H), 7.39 (d, *J* = 8.2 Hz, 2H), 7.24 (dd, *J* = 8.5, 1.8 Hz, 1H), 7.08 (d, *J* = 1.9 Hz, 1H), 6.94 (d, *J* = 8.5 Hz, 1H), 3.92 (s, 3H), 3.90 (s, 3H), 2.48 (s, 3H).

**<sup>19</sup>F NMR** (377 MHz, CDCl<sub>3</sub>) δ -101.2.

**<sup>13</sup>C NMR** (101 MHz, CDCl<sub>3</sub>) δ 152.4, 149.0, 146.7, 131.0, 130.0, 130.0, 122.0 (t, *J*<sub>C-F</sub> = 287.0 Hz), 121.5 (t, *J*<sub>C-F</sub> = 6.5 Hz), 118.7 (t, *J*<sub>C-F</sub> = 22.9 Hz), 110.8, 110.4 (t, *J*<sub>C-F</sub> = 5.9 Hz), 56.2, 56.2, 21.9.

**HRMS** Calcd for C<sub>16</sub>H<sub>16</sub>F<sub>2</sub>O<sub>4</sub>S [M+Na<sup>+</sup>]: 391.1150; Found: 391.1161.

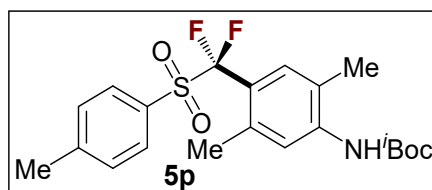

**Isobutyl (4-(difluoro(tosyl)methyl)-2,5-dimethylphenyl)carbamate, (5p), Yield: 71%**

**<sup>1</sup>H NMR** (400 MHz, CDCl<sub>3</sub>) δ 7.93 (s, 1H), 7.86 (d, *J* = 8.2 Hz, 2H), 7.40 (d, *J* = 8.1 Hz, 2H), 7.31 (s, 1H), 6.55 (s, 1H), 3.98 (d, *J* = 6.7 Hz, 2H), 2.51 (t, *J* = 3.2 Hz, 3H), 2.48 (s, 3H), 2.23 (s, 3H), 2.11 – 1.90 (m, 1H), 0.98 (d, *J* = 6.7 Hz, 6H).

**<sup>19</sup>F NMR** (377 MHz, CDCl<sub>3</sub>) δ -95.8.

**<sup>13</sup>C NMR** (101 MHz, CDCl<sub>3</sub>) δ 153.5, 146.6, 139.7, 138.5, 131.5 (t, *J*<sub>C-F</sub> = 8.2 Hz), 130.9, 130.2, 130.0, 123.4 (t, *J*<sub>C-F</sub> = 288.6 Hz), 123.2, 122.8, 119.2 (t, *J*<sub>C-F</sub> = 20.7 Hz), 71.8, 28.0, 21.9, 20.8, 19.2, 17.2.

**HRMS** Calcd for C<sub>21</sub>H<sub>25</sub>F<sub>2</sub>NO<sub>4</sub>S [M+Na<sup>+</sup>]: 448.1370; Found: 448.1361.

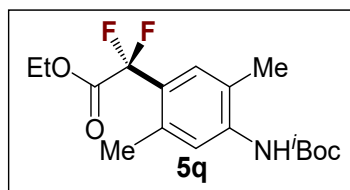

**Ethyl 2,2-difluoro-2-(4-((isobutoxycarbonyl)amino)-2,5-dimethylphenyl)acetate, (5q), Yield: 84%**

**<sup>1</sup>H NMR** (400 MHz, CDCl<sub>3</sub>) δ 7.81 (s, 1H), 7.34 (s, 1H), 6.47 (s, 1H), 4.30 (q, *J* = 7.1 Hz, 2H), 3.97 (d, *J* = 6.7 Hz, 2H), 2.37 (s, 3H), 2.25 (s, 3H), 1.99 (dp, *J* = 13.4, 6.7 Hz, 1H), 1.30 (t, *J* = 7.1 Hz, 3H), 0.97 (d, *J* = 6.7 Hz, 6H).

**<sup>19</sup>F NMR** (377 MHz, CDCl<sub>3</sub>) δ -100.8.

**<sup>13</sup>C NMR** (101 MHz, CDCl<sub>3</sub>) δ 163.3 (t, *J*<sub>C-F</sub> = 35.7 Hz), 152.7, 137.1, 134.3 (t, *J*<sub>C-F</sub> = 2.9 Hz), 127.1 (t, *J*<sub>C-F</sub> = 8.8 Hz), 121.9, 113.1 (t, *J*<sub>C-F</sub> = 251.7 Hz), 70.6, 62.0, 27.0, 18.5, 18.0, 16.1, 12.9.

**HRMS** Calcd for C<sub>17</sub>H<sub>23</sub>F<sub>2</sub>NO<sub>4</sub> [M+Na<sup>+</sup>]: 366.1487; Found: 366.1493.

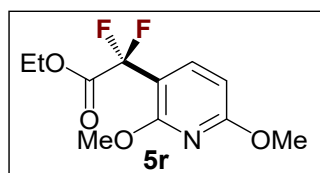

**Ethyl 2-(2,6-dimethoxy-pyridin-3-yl)-2,2-difluoroacetate, (5r), Yield: 95%**

**<sup>1</sup>H NMR** (400 MHz, CDCl<sub>3</sub>) δ 7.80 (d, *J* = 8.3 Hz, 1H), 6.37 (d, *J* = 8.3 Hz, 1H), 4.33 (q, *J* = 7.1 Hz, 2H), 3.93 (d, *J* = 1.9 Hz, 6H), 1.31 (t, *J* = 7.1 Hz, 3H).

**<sup>19</sup>F NMR** (377 MHz, CDCl<sub>3</sub>) δ -101.7.

$^{13}\text{C}$  NMR (101 MHz,  $\text{CDCl}_3$ )  $\delta$  165.0, 164.0 (t,  $J_{\text{C-F}} = 34.5$  Hz), 159.9 (t,  $J_{\text{C-F}} = 5.1$  Hz), 138.5 (t,  $J_{\text{C-F}} = 6.2$  Hz), 112.4 (t,  $J_{\text{C-F}} = 248.0$  Hz), 107.4 (t,  $J_{\text{C-F}} = 26.2$  Hz), 101.5, 62.9, 53.9, 53.7, 14.1.

HRMS Calcd for  $\text{C}_{11}\text{H}_{13}\text{F}_2\text{NO}_4$  [ $\text{M}+\text{Na}^+$ ]: 284.0705; Found: 284.0710.

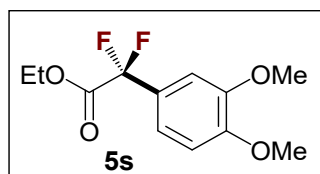

**Ethyl 2-(3,4-dimethoxyphenyl)-2,2-difluoroacetate, (5s), Yield: 51%**

$^1\text{H}$  NMR (400 MHz,  $\text{CDCl}_3$ )  $\delta$  7.17 (dd,  $J = 8.5, 1.5$  Hz, 1H), 7.09 (d,  $J = 1.9$  Hz, 1H), 6.90 (d,  $J = 8.4$  Hz, 1H), 4.30 (q,  $J = 7.1$  Hz, 2H), 3.90 (s, 6H), 1.30 (t,  $J = 7.1$  Hz, 3H).

$^{19}\text{F}$  NMR (377 MHz,  $\text{CDCl}_3$ )  $\delta$  -102.6.

$^{13}\text{C}$  NMR (101 MHz,  $\text{CDCl}_3$ )  $\delta$  164.5 (t,  $J_{\text{C-F}} = 36.0$  Hz), 151.2, 149.1, 125.2 (t,  $J_{\text{C-F}} = 26.2$  Hz), 118.6 (t,  $J_{\text{C-F}} = 6.6$  Hz), 113.5 (t,  $J_{\text{C-F}} = 252.0$  Hz), 110.9, 108.4 (t,  $J_{\text{C-F}} = 6.1$  Hz), 63.2, 56.1, 56.1, 14.0.

HRMS Calcd for  $\text{C}_{12}\text{H}_{14}\text{F}_2\text{O}_4$  [ $\text{M}+\text{Na}^+$ ]: 283.0752; Found: 283.0760.

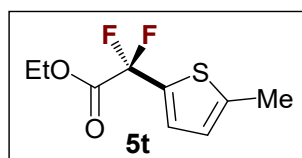

**Ethyl 2,2-difluoro-2-(5-methylthiophen-2-yl)acetate, (5t), Yield: 93%.**

$^1\text{H}$  NMR (400 MHz,  $\text{CDCl}_3$ )  $\delta$  7.20 – 7.15 (m, 1H), 6.75 – 6.66 (m, 1H), 4.35 (q,  $J = 7.1$  Hz, 2H), 2.50 (d,  $J = 1.1$  Hz, 3H), 1.35 (t,  $J = 7.1$  Hz, 4H).

$^{19}\text{F}$  NMR (377 MHz,  $\text{CDCl}_3$ )  $\delta$  -92.8.

$^{13}\text{C}$  NMR (101 MHz,  $\text{CDCl}_3$ )  $\delta$  163.6 (t,  $J_{\text{C-F}} = 35.4$  Hz), 144.3, 131.3 (t,  $J_{\text{C-F}} = 30.3$  Hz), 128.7 (t,  $J_{\text{C-F}} = 5.8$  Hz), 125.5, 111.8 (t,  $J_{\text{C-F}} = 249.9$  Hz), 63.5, 15.4, 14.0.

HRMS Calcd for  $\text{C}_9\text{H}_{10}\text{F}_2\text{O}_2\text{S}$  [ $\text{M}+\text{Na}^+$ ]: 243.0262; Found: 243.0266.

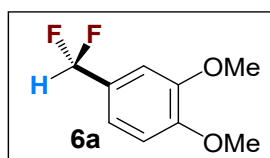

**4-(difluoromethyl)-1,2-dimethoxybenzene, (6a), Yield: 71%.**

$^1\text{H}$  NMR (400 MHz,  $\text{CDCl}_3$ )  $\delta$  7.08 – 6.99 (m, 2H), 6.88 (d,  $J = 8.1$  Hz, 1H), 6.57 (t,  $J = 56.7$  Hz, 1H), 3.89 (s, 3H), 3.89 (s, 3H).

$^{19}\text{F}$  NMR (377 MHz,  $\text{CDCl}_3$ )  $\delta$  -108.2.

$^{13}\text{C}$  NMR (101 MHz,  $\text{CDCl}_3$ )  $\delta$  151.0, 149.3, 127.0 (t,  $J_{\text{C-F}} = 22.6$  Hz), 118.8 (t,  $J_{\text{C-F}} = 7.0$  Hz), 115.0 (t,  $J_{\text{C-F}} = 237.7$  Hz), 110.8, 108.1 (t,  $J_{\text{C-F}} = 5.3$  Hz), 56.0, 56.0.

HRMS Calcd for  $\text{C}_9\text{H}_{10}\text{F}_2\text{O}_2$  [ $\text{M}+\text{H}^+$ ]: 189.0722; Found: 189.0727.

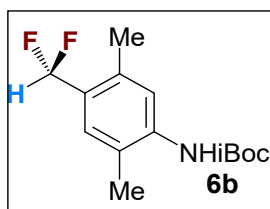

**Isobutyl (4-(difluoromethyl)-2,5-dimethylphenyl)carbamate, (6b), Yield: 78%.**

$^1\text{H NMR}$  (400 MHz,  $\text{CDCl}_3$ )  $\delta$  7.80 (s, 1H), 7.28 (s, 1H), 6.70 (t,  $J = 55.7$  Hz, 1H), 6.44 (s, 1H), 3.97 (d,  $J = 6.7$  Hz, 2H), 2.39 (s, 3H), 2.25 (s, 3H), 2.10 – 1.92 (m, 1H), 0.98 (d,  $J = 6.7$  Hz, 6H).

$^{19}\text{F NMR}$  (377 MHz,  $\text{CDCl}_3$ )  $\delta$  -112.0.

$^{13}\text{C NMR}$  (101 MHz,  $\text{CDCl}_3$ )  $\delta$  153.9, 138.0, 135.3 (t,  $J_{\text{C-F}} = 4.7$  Hz), 128.0 (t,  $J_{\text{C-F}} = 7.3$  Hz), 127.5 (t,  $J_{\text{C-F}} = 21.0$  Hz), 122.4, 114.4 (t,  $J_{\text{C-F}} = 237.0$  Hz), 71.8, 28.1, 19.2, 18.4, 17.3.

**HRMS** Calcd for  $\text{C}_{14}\text{H}_{19}\text{F}_2\text{NO}_2$  [ $\text{M}+\text{Na}^+$ ]: 294.1276; Found: 294.1281.

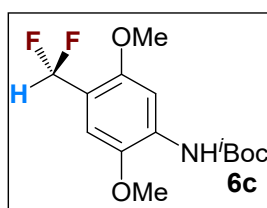

**Isobutyl (4-(difluoromethyl)-2,5-dimethoxyphenyl)carbamate, (6c), Yield: 66%.**

$^1\text{H NMR}$  (400 MHz,  $\text{CDCl}_3$ )  $\delta$  7.93 (s, 1H), 7.36 (s, 1H), 7.04 (s, 1H), 6.94 (t,  $J = 14.1$  Hz, 1H), 3.97 (d,  $J = 6.7$  Hz, 2H), 3.88 (s, 3H), 3.85 (s, 3H), 1.99 (td,  $J = 13.5, 6.8$  Hz, 1H), 0.98 (d,  $J = 6.7$  Hz, 6H).

$^{19}\text{F NMR}$  (377 MHz,  $\text{CDCl}_3$ )  $\delta$  -113.4.

$^{13}\text{C NMR}$  (101 MHz,  $\text{CDCl}_3$ )  $\delta$  153.7, 152.1 (t,  $J_{\text{C-F}} = 6.4$  Hz), 141.4, 131.0, 115.6 (t,  $J_{\text{C-F}} = 22.3$  Hz), 114.0, 111.6, 109.3, 107.8 (t,  $J_{\text{C-F}} = 5.6$  Hz), 102.2, 71.7, 60.5, 56.4, 56.4, 28.1, 19.2.

**HRMS (ESI)** Calcd for  $\text{C}_{14}\text{H}_{19}\text{F}_2\text{NO}_4$  [ $\text{M}+\text{Na}^+$ ]: 326.1180; Found: 326.1186.

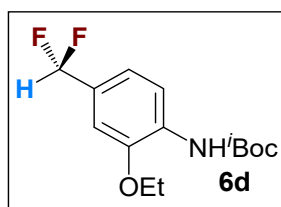

**tert-butyl (4-(difluoromethyl)-2-ethoxyphenyl)carbamate, (6d), Yield: 69%.**

$^1\text{H NMR}$  (400 MHz,  $\text{CDCl}_3$ )  $\delta$  8.17 (d,  $J = 7.4$  Hz, 1H), 7.30 (s, 1H), 7.06 (d,  $J = 8.3$  Hz, 1H), 7.00 (s, 1H), 6.58 (t,  $J = 56.7$  Hz, 1H), 4.14 (q,  $J = 7.0$  Hz, 2H), 3.97 (d,  $J = 6.7$  Hz, 2H), 2.01 (dp,  $J = 13.4, 6.7$  Hz, 1H), 1.48 (t,  $J = 7.0$  Hz, 3H), 0.98 (d,  $J = 6.7$  Hz, 6H).

$^{19}\text{F NMR}$  (377 MHz,  $\text{CDCl}_3$ )  $\delta$  -108.8.

$^{13}\text{C NMR}$  (101 MHz,  $\text{CDCl}_3$ )  $\delta$  153.6, 146.9, 130.2, 128.6 (t,  $J_{\text{C-F}} = 22.5$  Hz), 119.0 (t,  $J_{\text{C-F}} = 6.8$  Hz), 117.7, 115.0 (t,  $J_{\text{C-F}} = 238.0$  Hz), 107.6 (t,  $J_{\text{C-F}} = 5.5$  Hz), 71.7, 64.6, 28.1, 19.2, 14.9.

**HRMS** Calcd for  $\text{C}_{14}\text{H}_{19}\text{F}_2\text{NO}_3$  [ $\text{M}+\text{Na}^+$ ]: 310.1225; Found: 310.1230.

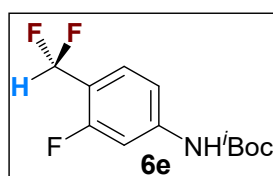

**isobutyl (4-(difluoromethyl)-3-fluorophenyl)carbamate, (6e), Yield: 45%.**

$^1\text{H NMR}$  (400 MHz,  $\text{CDCl}_3$ )  $\delta$  7.48 (dd,  $J = 14.2, 6.1$  Hz, 1H), 7.07 (dd,  $J = 8.5, 1.6$  Hz, 1H), 6.81 (s, 1H), 3.97 (d,  $J = 6.6$  Hz, 1H), 1.97 (td,  $J = 13.4, 6.7$  Hz, 1H), 0.97 (d,  $J = 6.7$  Hz, 3H).

$^{19}\text{F NMR}$  (377 MHz,  $\text{CDCl}_3$ )  $\delta$  -112.9, -117.8.

$^{13}\text{C NMR}$  (101 MHz,  $\text{CDCl}_3$ )  $\delta$  153.3, 142.2 (d,  $J_{\text{C-F}} = 10.9$  Hz), 130.0 (d,  $J_{\text{C-F}} = 208.6$  Hz), 127.5 (d,  $J_{\text{C-F}} = 20.0$  Hz), 127.5 (d,  $J_{\text{C-F}} = 4.6$  Hz), 113.8, 110.8 (t,  $J_{\text{C-F}} = 237.4$  Hz), 110.7 (t,  $J_{\text{C-F}} = 237.2$  Hz), 105.9 (d,  $J_{\text{C-F}} = 26.4$  Hz), 72.0, 28.1, 19.2.

**HRMS** Calcd for  $\text{C}_{12}\text{H}_{14}\text{F}_3\text{NO}_2$  [ $\text{M}+\text{Na}^+$ ]: 284.0869; Found: 284.0873.

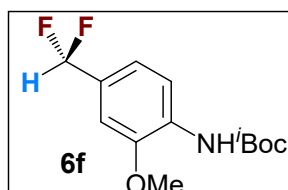

**tert-butyl (4-(difluoromethyl)-2-methoxyphenyl)carbamate, (6f), Yield: 74%**

$^1\text{H NMR}$  (400 MHz,  $\text{CDCl}_3$ )  $\delta$  8.18 (d,  $J = 7.9$  Hz, 1H), 7.31 (s, 1H), 7.07 (d,  $J = 8.3$  Hz, 1H), 7.01 (s, 1H), 6.59 (t,  $J = 56.7$  Hz, 1H), 3.97 (d,  $J = 6.7$  Hz, 2H), 3.92 (s, 3H), 2.10 – 1.89 (m, 1H), 0.98 (d,  $J = 6.7$  Hz, 6H).

$^{19}\text{F NMR}$  (377 MHz,  $\text{CDCl}_3$ )  $\delta$  -108.8.

$^{13}\text{C NMR}$  (101 MHz,  $\text{CDCl}_3$ )  $\delta$  153.6, 147.7, 130.2, 128.6 (t,  $J_{\text{C-F}} = 22.5$  Hz), 119.1 (t,  $J_{\text{C-F}} = 6.9$  Hz), 117.7, 114.9 (t,  $J_{\text{C-F}} = 238.0$  Hz), 106.8 (t,  $J_{\text{C-F}} = 5.5$  Hz), 71.7, 56.0, 28.1, 19.2.

**HRMS** Calcd for  $\text{C}_{13}\text{H}_{17}\text{F}_2\text{NO}_3$  [ $\text{M}+\text{Na}^+$ ]: 296.1069; Found: 296.1078.

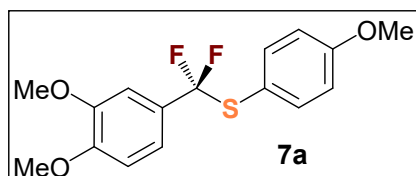

**((3,4-dimethoxyphenyl)difluoromethyl)(4-methoxyphenyl)sulfane, (7a), Yield: 66%**

$^1\text{H NMR}$  (400 MHz,  $\text{CDCl}_3$ )  $\delta$  7.53 (d,  $J = 8.7$  Hz, 2H), 7.13 (d,  $J = 8.4$  Hz, 1H), 7.02 (d,  $J = 1.8$  Hz, 1H), 6.94 – 6.82 (m, 3H), 3.91 (s, 3H), 3.90 (s, 3H), 3.83 (s, 3H).

$^{19}\text{F NMR}$  (377 MHz,  $\text{CDCl}_3$ )  $\delta$  -71.1.

$^{13}\text{C NMR}$  (101 MHz,  $\text{CDCl}_3$ )  $\delta$  161.3, 150.8, 148.8, 138.3, 118.5 (t,  $J_{\text{C-F}} = 4.1$  Hz), 114.7, 110.6, 108.7 (t,  $J_{\text{C-F}} = 4.6$  Hz), 56.1, 55.5.

**HRMS** Calcd for  $\text{C}_{16}\text{H}_{16}\text{F}_2\text{O}_3\text{S}$  [ $\text{M}+\text{Na}^+$ ]: 349.0686; Found: 349.0693.

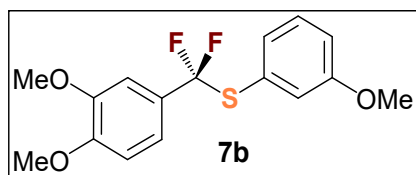

**((3,4-dimethoxyphenyl)difluoromethyl)(3-methoxyphenyl)sulfane, (7b), Yield: 58%.**

$^1\text{H NMR}$  (400 MHz,  $\text{CDCl}_3$ )  $\delta$  7.29 (d,  $J = 7.8$  Hz, 1H), 7.23 – 7.12 (m, 3H), 7.04 (d,  $J = 1.9$  Hz, 1H), 6.96 (dd,  $J = 7.8, 2.1$  Hz, 1H), 6.87 (d,  $J = 8.4$  Hz, 1H), 3.91 (s, 3H), 3.90 (s, 3H), 3.81 (s, 3H).

$^{19}\text{F}$  NMR (377 MHz,  $\text{CDCl}_3$ )  $\delta$  -69.9.

$^{13}\text{C}$  NMR (101 MHz,  $\text{CDCl}_3$ )  $\delta$  159.8, 150.9, 148.8, 129.8, 128.9, 128.5, 128.5, 127.8, 121.1, 118.6 (t,  $J_{\text{C-F}} = 5.0$  Hz), 116.2, 110.6, 108.6 (t,  $J_{\text{C-F}} = 4.4$  Hz), 56.2, 55.5.

HRMS Calcd for  $\text{C}_{16}\text{H}_{16}\text{F}_2\text{O}_3\text{S}$  [ $\text{M}+\text{Na}^+$ ]: 349.0680; Found: 349.0690.

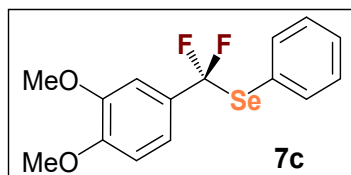

**((3,4-dimethoxyphenyl)difluoromethyl)(phenyl)selane, (7c), Yield: 31%.**

$^1\text{H}$  NMR (400 MHz,  $\text{CDCl}_3$ )  $\delta$  7.65 (d,  $J = 7.1$  Hz, 1H), 7.40 (t,  $J = 7.4$  Hz, 1H), 7.32 (t,  $J = 7.4$  Hz, 3H), 7.07 (d,  $J = 7.4$  Hz, 1H), 6.92 (s, 1H), 6.84 (d,  $J = 8.4$  Hz, 1H), 3.90 (s, 3H), 3.85 (s, 3H).

$^{19}\text{F}$  NMR (377 MHz,  $\text{CDCl}_3$ )  $\delta$  -68.1.

$^{13}\text{C}$  NMR (101 MHz,  $\text{CDCl}_3$ )  $\delta$  148.7, 137.2, 129.5, 129.2, 118.1, 110.6, 108.3, 56.1, 56.1, 29.9.

HRMS Calcd for  $\text{C}_{15}\text{H}_{14}\text{F}_2\text{O}_2\text{Se}$  [ $\text{M}+\text{Na}^+$ ]: 367.0019; Found: 367.0032.

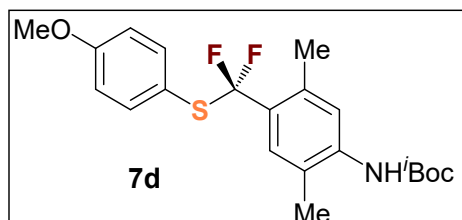

**Isobutyl 4-(difluoro((4-methoxyphenyl)thio)methyl)-2,5-dimethylphenyl)carbamate, (7d), Yield: 56%.**

$^1\text{H}$  NMR (400 MHz,  $\text{CDCl}_3$ )  $\delta$  7.81 (s, 1H), 7.53 (d,  $J = 8.8$  Hz, 2H), 7.23 (s, 1H), 6.89 (d,  $J = 8.8$  Hz, 2H), 6.44 (s, 1H), 3.97 (d,  $J = 6.7$  Hz, 2H), 3.83 (s, 3H), 2.57 (s, 3H), 2.21 (s, 3H), 1.99 (td,  $J = 13.4, 6.7$  Hz, 1H), 0.98 (d,  $J = 6.7$  Hz, 6H).

$^{19}\text{F}$  NMR (377 MHz,  $\text{CDCl}_3$ )  $\delta$  -70.1.

$^{13}\text{C}$  NMR (101 MHz,  $\text{CDCl}_3$ )  $\delta$  161.3, 153.8, 138.4, 137.9, 135.4, 128.3 (t,  $J_{\text{C-F}} = 7.0$  Hz), 127.9, 123.1, 118.4, 114.6, 71.8, 55.5, 28.1, 19.2, 17.2.

HRMS Calcd for  $\text{C}_{21}\text{H}_{25}\text{F}_2\text{NO}_3\text{S}$  [ $\text{M}+\text{Na}^+$ ]: 432.1415; Found: 432.1421.

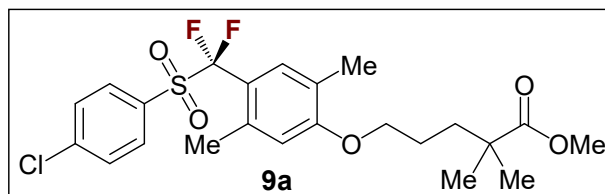

**Methyl 5-(4-(((4-chlorophenyl)sulfonyl)difluoromethyl)-2,5-dimethylphenoxy)-2,2-dimethylpentanoate, (9a), Yield: 81%.**

$^1\text{H}$  NMR (400 MHz,  $\text{CDCl}_3$ )  $\delta$  7.84 (d,  $J = 8.5$  Hz, 2H), 7.48 (d,  $J = 8.5$  Hz, 2H), 7.17 (s, 1H), 6.56 (s, 1H), 3.88 (t,  $J = 5.6$  Hz, 2H), 3.58 (s, 3H), 2.44 (t,  $J = 2.9$  Hz, 3H), 2.10 (s, 3H), 1.80 – 1.52 (m, 4H), 1.14 (s, 6H).

$^{19}\text{F}$  NMR (377 MHz,  $\text{CDCl}_3$ )  $\delta$  -94.8.

$^{13}\text{C}$  NMR (101 MHz,  $\text{CDCl}_3$ )  $\delta$  178.2, 160.0, 142.1, 138.7, 132.2, 132.0, 131.6 (t,  $J_{\text{C-F}} = 8.0$  Hz), 129.6, 124.5, 123.8 (t,  $J_{\text{C-F}} = 288.7$  Hz), 115.2 (t,  $J_{\text{C-F}} = 20.5$  Hz), 114.4, 68.1, 51.8, 42.1, 37.0, 25.2, 25.0, 20.9, 15.7.

HRMS Calcd for  $\text{C}_{23}\text{H}_{27}\text{ClF}_2\text{O}_5\text{S}$  [ $\text{M}+\text{Na}^+$ ]: 511.1128; Found: 511.1111.

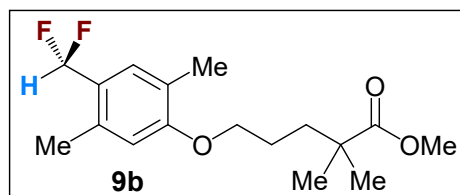

**Methyl 5-(4-(difluoromethyl)-2,5-dimethylphenoxy)-2,2-dimethylpentanoate, (9b), Yield: 67%.**

$^1\text{H}$  NMR (400 MHz,  $\text{CDCl}_3$ )  $\delta$  7.24 (s, 1H), 6.68 (t,  $J = 14.1$  Hz, 1H), 6.60 (s, 1H), 3.94 (t,  $J = 5.7$  Hz, 2H), 3.67 (s, 3H), 2.38 (s, 3H), 2.20 (s, 3H), 1.82 – 1.67 (m, 4H), 1.22 (s, 6H).

$^{19}\text{F}$  NMR (377 MHz,  $\text{CDCl}_3$ )  $\delta$  -110.3.

$^{13}\text{C}$  NMR (101 MHz,  $\text{CDCl}_3$ )  $\delta$  178.4, 158.6, 135.2 (t,  $J_{\text{C-F}} = 4.6$  Hz), 128.4 (t,  $J_{\text{C-F}} = 7.0$  Hz), 124.3, 124.0 (t,  $J_{\text{C-F}} = 21.1$  Hz), 114.9 (t,  $J_{\text{C-F}} = 237.1$  Hz), 113.4, 68.2, 51.9, 42.2, 37.1, 25.3, 25.2, 18.6, 15.8.

HRMS Calcd for  $\text{C}_{17}\text{H}_{24}\text{F}_2\text{O}_3$  [ $\text{M}+\text{Na}^+$ ]: 337.1586; Found: 337.1591.

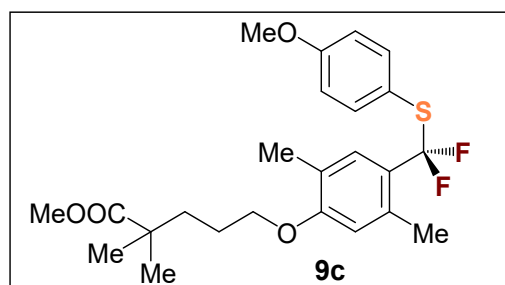

**Methyl 5-(4-(difluoro((4-methoxyphenyl)thio)methyl)-2,5-dimethylphenoxy)-2,2-dimethylpentanoate, (9c), Yield: 49%.**

$^1\text{H}$  NMR (400 MHz,  $\text{CDCl}_3$ )  $\delta$  7.59 – 7.50 (m, 2H), 7.23 (s, 1H), 6.90 (d,  $J = 8.8$  Hz, 2H), 6.60 (s, 1H), 3.95 (t,  $J = 5.6$  Hz, 2H), 3.83 (s, 3H), 3.67 (s, 3H), 2.55 (s, 3H), 2.16 (s, 3H), 1.59 (s, 2H), 1.22 (s, 6H).

$^{19}\text{F}$  NMR (377 MHz,  $\text{CDCl}_3$ )  $\delta$  -69.0.

$^{13}\text{C}$  NMR (101 MHz,  $\text{CDCl}_3$ )  $\delta$  178.4, 161.2, 158.5, 138.3, 135.3, 128.6 (t,  $J_{\text{C-F}} = 6.6$  Hz), 123.9, 118.7, 114.6, 114.1, 68.2, 55.5, 51.9, 42.2, 37.2, 25.3, 25.2, 15.8.

HRMS Calcd for  $\text{C}_{24}\text{H}_{30}\text{F}_2\text{O}_4\text{S}$  [ $\text{M}+\text{Na}^+$ ]: 475.1725; Found: 475.1734.

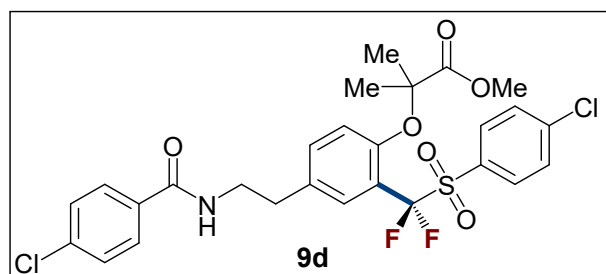

**Methyl 2-(4-(2-(4-chlorobenzamido)ethyl)-2-(((4-chlorophenyl)sulfonyl)difluoromethyl)phenoxy)-2-methylpropanoate, (9d), Yield: 44%.**

**<sup>1</sup>H NMR** (400 MHz, CDCl<sub>3</sub>) δ 7.84 (d, *J* = 8.6 Hz, 2H), 7.67 (d, *J* = 8.5 Hz, 2H), 7.56 (d, *J* = 8.6 Hz, 2H), 7.40 – 7.31 (m, 3H), 7.31 – 7.22 (m, 1H), 6.63 (d, *J* = 8.6 Hz, 1H), 6.42 (s, 1H), 3.76 (s, 3H), 3.63 (q, *J* = 6.6 Hz, 2H), 2.87 (t, *J* = 6.8 Hz, 2H), 1.61 (s, 6H).

**<sup>19</sup>F NMR** (377 MHz, CDCl<sub>3</sub>) δ -96.4.

**<sup>13</sup>C NMR** (101 MHz, CDCl<sub>3</sub>) δ 174.7, 166.7, 153.9, 142.3, 137.8, 133.9, 132.9, 132.2, 132.0, 131.9, 130.8 (t, *J*<sub>C-F</sub> = 7.7 Hz), 129.8, 128.9, 128.6, 122.4 (t, *J*<sub>C-F</sub> = 289.4 Hz), 117.7, 116.7 (t, *J*<sub>C-F</sub> = 20.0 Hz), 80.0, 52.8, 41.1, 34.6, 24.9.

**HRMS** Calcd for C<sub>27</sub>H<sub>25</sub>Cl<sub>2</sub>F<sub>2</sub>NO<sub>6</sub>S [M+Na<sup>+</sup>]: 622.0640; Found: 622.0653.

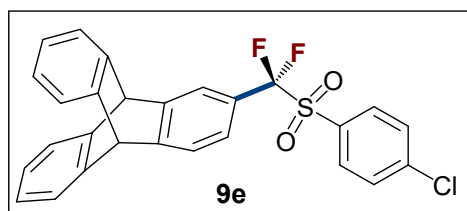

**(9r,10r)-2-(((4-chlorophenyl)sulfonyl)difluoromethyl)-9,10-dihydro-9,10-[1,2]benzenoanthracene, (9e), Yield: 32%.**

**<sup>1</sup>H NMR** (400 MHz, CDCl<sub>3</sub>) δ 7.84 (d, *J* = 8.6 Hz, 2H), 7.60 (d, *J* = 1.3 Hz, 1H), 7.57 – 7.46 (m, 3H), 7.46 – 7.38 (m, 4H), 7.36 (dd, *J* = 7.7, 1.5 Hz, 1H), 7.11 – 6.95 (m, 4H), 5.52 (s, 1H), 5.48 (s, 1H).

**<sup>19</sup>F NMR** (377 MHz, CDCl<sub>3</sub>) δ -100.8.

**<sup>13</sup>C NMR** (101 MHz, CDCl<sub>3</sub>) δ 150.3, 146.2, 144.5, 144.3, 142.4, 132.3, 131.4, 125.6 (t, *J*<sub>C-F</sub> = 6.36 Hz), 129.7, 125.7, 125.7, 124.1, 124.0, 123.9, 122.8 (t, *J*<sub>C-F</sub> = 5.8 Hz), 54.1, 53.9.

**HRMS** Calcd for C<sub>27</sub>H<sub>17</sub>ClF<sub>2</sub>O<sub>2</sub>S [M+Na<sup>+</sup>]: 501.0498; Found: 501.0509.

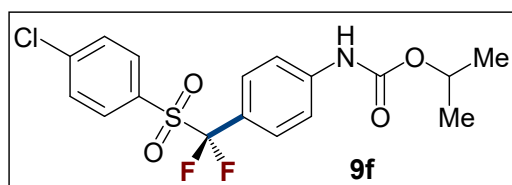

**Isopropyl (4-(((4-chlorophenyl)sulfonyl)difluoromethyl)phenyl)carbamate, (9f), Yield: 35%.**

**<sup>1</sup>H NMR** (400 MHz, CDCl<sub>3</sub>) δ 7.92 (d, *J* = 8.6 Hz, 2H), 7.67 – 7.45 (m, 6H), 6.80 (s, 1H), 5.04 (dt, *J* = 12.5, 6.3 Hz, 1H), 1.31 (d, *J* = 6.3 Hz, 6H).

**<sup>19</sup>F NMR** (377 MHz, CDCl<sub>3</sub>) δ -101.3.

**<sup>13</sup>C NMR** (101 MHz, CDCl<sub>3</sub>) δ 152.9, 142.5, 142.4, 132.4, 131.5, 129.8, 129.1 (t, *J*<sub>C-F</sub> = 6.0 Hz), 120.3 (t, *J*<sub>C-F</sub> = 22.8 Hz), 118.0, 69.6, 22.2.

**HRMS** Calcd for C<sub>17</sub>H<sub>16</sub>ClF<sub>2</sub>NO<sub>4</sub>S [M+Na<sup>+</sup>]: 426.0349; Found: 426.0358.

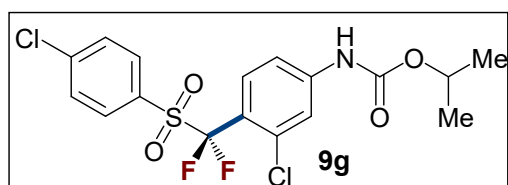

**Isopropyl (3-chloro-4-(((4-chlorophenyl)sulfonyl)difluoromethyl)phenyl)carbamate, (9g), Yield: 31%.**



**<sup>1</sup>H NMR** (400 MHz, CDCl<sub>3</sub>) δ 7.93 (d, *J* = 8.6 Hz, 2H), 7.71 – 7.50 (m, 4H), 7.37 (d, *J* = 9.5 Hz, 1H), 6.85 (s, 1H), 5.03 (dt, *J* = 12.5, 6.3 Hz, 1H), 1.31 (d, *J* = 6.3 Hz, 6H).

**<sup>19</sup>F NMR** (377 MHz, CDCl<sub>3</sub>) δ -96.5.

**<sup>13</sup>C NMR** (101 MHz, CDCl<sub>3</sub>) δ 152.6, 143.0, 142.7, 135.1 (t, *J*<sub>C-F</sub> = 2.3 Hz), 132.4, 132.0 (t, *J*<sub>C-F</sub> = 7.7 Hz), 131.5, 129.9, 121.8 (t, *J*<sub>C-F</sub> = 290.4 Hz), 120.9, 118.1 (t, *J*<sub>C-F</sub> = 21.6 Hz), 116.0, 70.0, 22.1.

**HRMS** Calcd for C<sub>17</sub>H<sub>15</sub>Cl<sub>2</sub>F<sub>2</sub>NO<sub>4</sub>S [M+Na<sup>+</sup>]: 459.9965; Found: 459.9971.

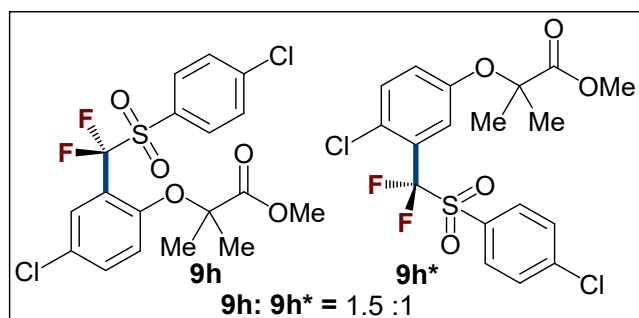

methyl 2-(4-chloro-2-(((4-chlorophenyl)sulfonyl)difluoromethyl)phenoxy)-2-methylpropanoate (**9h**);  
methyl 2-(4-chloro-3-(((4-chlorophenyl)sulfonyl)difluoromethyl)phenoxy)-2-methylpropanoate (**9h\***);  
a mixture of **9h** and **9h\*** in a ratio of 1.5:1.

**9h** **<sup>19</sup>F NMR** (377 MHz, CDCl<sub>3</sub>) δ -96.6

**9h\*** **<sup>19</sup>F NMR** (377 MHz, CDCl<sub>3</sub>) δ -97.3

**HRMS** Calcd for C<sub>18</sub>H<sub>16</sub>Cl<sub>2</sub>F<sub>2</sub>O<sub>5</sub>S [M+Na<sup>+</sup>]: 474.9956; Found: 474.9949.

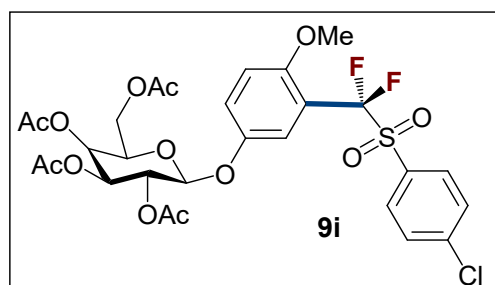

**(2R,4S,5R,6S)-2-(acetoxymethyl)-6-(3-(((4-chlorophenyl)sulfonyl)difluoromethyl)-4-methoxyphenoxy)tetrahydro-2H-pyran-3,4,5-triyl triacetate, (9i), Yield: 52%**

**<sup>1</sup>H NMR** (400 MHz, CDCl<sub>3</sub>) δ 9.07 (dd, *J* = 8.8, 2.1 Hz, 1H), 9.01 (d, *J* = 2.2 Hz, 1H), 8.97 (s, 1H), 8.27 (s, 1H), 7.90 (d, *J* = 8.6 Hz, 2H), 7.61 – 7.49 (m, 2H), 7.13 (d, *J* = 8.9 Hz, 1H), 6.29 (d, *J* = 5.5 Hz, 1H), 6.00 (t, *J* = 5.5 Hz, 1H), 5.75 – 5.63 (m, 1H), 4.57 – 4.28 (m, 3H), 3.85 (s, 3H), 2.16 (s, 3H), 2.14 (s, 3H), 2.08 (s, 3H).

**<sup>19</sup>F NMR** (377 MHz, CDCl<sub>3</sub>) δ -97.3.

**<sup>13</sup>C NMR** (101 MHz, CDCl<sub>3</sub>) δ 170.5, 169.8, 169.5, 160.9, 152.7 (t, *J*<sub>C-F</sub> = 58.5 Hz), 142.7, 142.1, 136.0, 132.4, 132.2, 132.1 (t, *J*<sub>C-F</sub> = 8.2 Hz), 131.3, 129.5, 128.1, 122.4 (t, *J*<sub>C-F</sub> = 289.7 Hz), 115.5 (t, *J*<sub>C-F</sub> = 20.9 Hz), 112.5, 86.4, 80.5, 73.1, 70.8, 63.2, 56.3, 20.9, 20.7, 20.5.

**HRMS** Calcd for C<sub>28</sub>H<sub>29</sub>ClF<sub>2</sub>O<sub>13</sub>S [M+Na<sup>+</sup>]: 701.0878; Found: 701.0900.

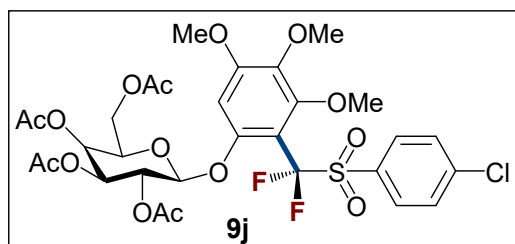

**(2R,4S,5R,6S)-2-(acetoxymethyl)-6-(2-(((4-chlorophenyl)sulfonyl)difluoromethyl)-3,4,5-trimethoxyphenoxy)tetrahydro-2H-pyran-3,4,5-triyl triacetate, (9j), Yield: 43%**

<sup>1</sup>H NMR (400 MHz, CDCl<sub>3</sub>) δ 8.91 (s, 1H), 8.20 (s, 1H), 7.84 (d, *J* = 8.7 Hz, 2H), 7.46 (d, *J* = 8.7 Hz, 2H), 6.69 (s, 1H), 6.24 (d, *J* = 4.7 Hz, 1H), 6.04 – 5.90 (m, 1H), 5.69 (t, *J* = 5.3 Hz, 1H), 4.52 – 4.43 (m, 2H), 4.37 (dd, *J* = 12.9, 5.1 Hz, 1H), 3.96 (s, 3H), 3.88 (s, 3H), 3.85 (s, 3H), 2.14 (s, 3H), 2.10 (s, 3H), 2.08 (s, 3H).

<sup>19</sup>F NMR (377 MHz, CDCl<sub>3</sub>) δ -84.9.

<sup>13</sup>C NMR (101 MHz, CDCl<sub>3</sub>) δ 170.4, 169.7, 169.5, 158.4, 156.2, 154.5 (t, *J* = 3.6 Hz), 151.9, 150.9, 143.3, 143.2, 141.5, 133.6, 132.1, 131.0, 129.2, 123.5 (t, *J* = 292.6 Hz), 113.5 (t, *J* = 20.0 Hz), 110.4, 86.9, 80.3, 73.3, 70.4, 62.9, 62.0, 60.9, 56.3, 20.8, 20.6, 20.5.

HRMS Calcd for C<sub>30</sub>H<sub>33</sub>ClF<sub>2</sub>O<sub>15</sub>S [M+Na<sup>+</sup>]: 761.1089; Found: 761.1103.

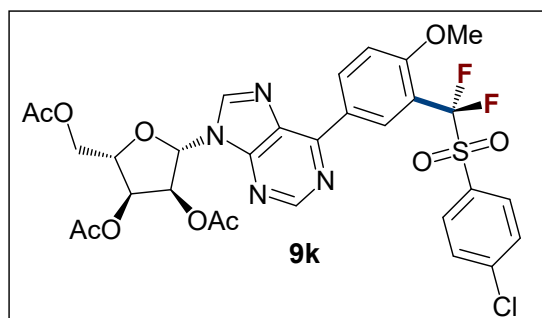

**(2S,3S,4S,5S)-2-(acetoxymethyl)-5-(6-(3-(((4-chlorophenyl)sulfonyl)difluoromethyl)-4-methoxyphenyl)-9H-purin-9-yl)tetrahydrofuran-3,4-diyl diacetate, (9k), Yield: 76%**

<sup>1</sup>H NMR (400 MHz, CDCl<sub>3</sub>) δ 9.07 (dd, *J* = 8.8, 2.1 Hz, 1H), 9.01 (d, *J* = 2.2 Hz, 1H), 8.97 (s, 1H), 8.27 (s, 1H), 7.90 (d, *J* = 8.6 Hz, 2H), 7.56 – 7.49 (m, 2H), 7.13 (d, *J* = 8.9 Hz, 1H), 6.29 (d, *J* = 5.5 Hz, 1H), 6.00 (t, *J* = 5.5 Hz, 1H), 5.76 – 5.57 (m, 1H), 4.55 – 4.32 (m, 3H), 3.85 (s, 3H), 2.15 (d, *J* = 6.9 Hz, 6H), 2.08 (s, 3H).

<sup>19</sup>F NMR (377 MHz, CDCl<sub>3</sub>) δ -97.3.

<sup>13</sup>C NMR (101 MHz, CDCl<sub>3</sub>) δ 170.5, 169.7, 169.5, 160.9, 152.71 (t, *J*<sub>C-F</sub> = 58.5 Hz), 142.7, 142.4 (d, *J*<sub>C-F</sub> = 52.0 Hz), 136.0, 132.4, 132.2, 131.3, 132.1 (t, *J*<sub>C-F</sub> = 8.2 Hz), 129.5, 128.1, 122.4 (t, *J*<sub>C-F</sub> = 289.7 Hz), 115.5 (t, *J* = 20.9 Hz), 112.5, 86.4, 80.5, 73.1, 70.8, 63.2, 56.3, 20.9, 20.7, 20.5.

HRMS Calcd for C<sub>30</sub>H<sub>27</sub>ClF<sub>2</sub>N<sub>4</sub>O<sub>10</sub>S [M+Na<sup>+</sup>]: 731.0997; Found: 731.0974.

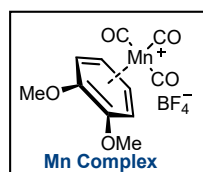

<sup>1</sup>H NMR (400 MHz, Acetone) δ 6.83 (s, 2H), 6.48 (s, 2H), 4.19 (s, 6H).

### 13. Reference

- 1) J. Han, J. Han, S. Chem, T. Zhong, Y. J. He, X. L. Yang, G. Q. Wang, C. J. Zhu, J. Xie. *Nat. Synth.* **2022**, *1*, 475-486.
- 2) J. J. Yu, X. Zhang, X. X. Wu, T. Liu, Z. Q. Zhang, J. Wu, C. Zhu. *Chem.* **2023**, *9*, 472-482.
- 3) X. P. Jiang, Y. Q. Q. Jiang, Q. Q. Liu, B. Li, D. Q. Shi, Y. S. Zhao. *J. Org. Chem.* **2022**, *87*, 3546-3554.
- 4) Z. Q. Wei, Z. Z. Lou, C. F. Ni, W. Zhang, J. B. Hu. *Chem. Commun.* **2022**, *58*, 10024-10027.
- 5) a) K. Li, W. Q. Wu, Y. Z. Lin, H. Shi. *Nat. Commun.* **2023**, *14*, 2170; b) S.H. Sun, L. K. Yeung, D. A. Sweigart. *Organometallics.* **1995**, *14*, 2613-2615.

14. Copies of NMR spectra

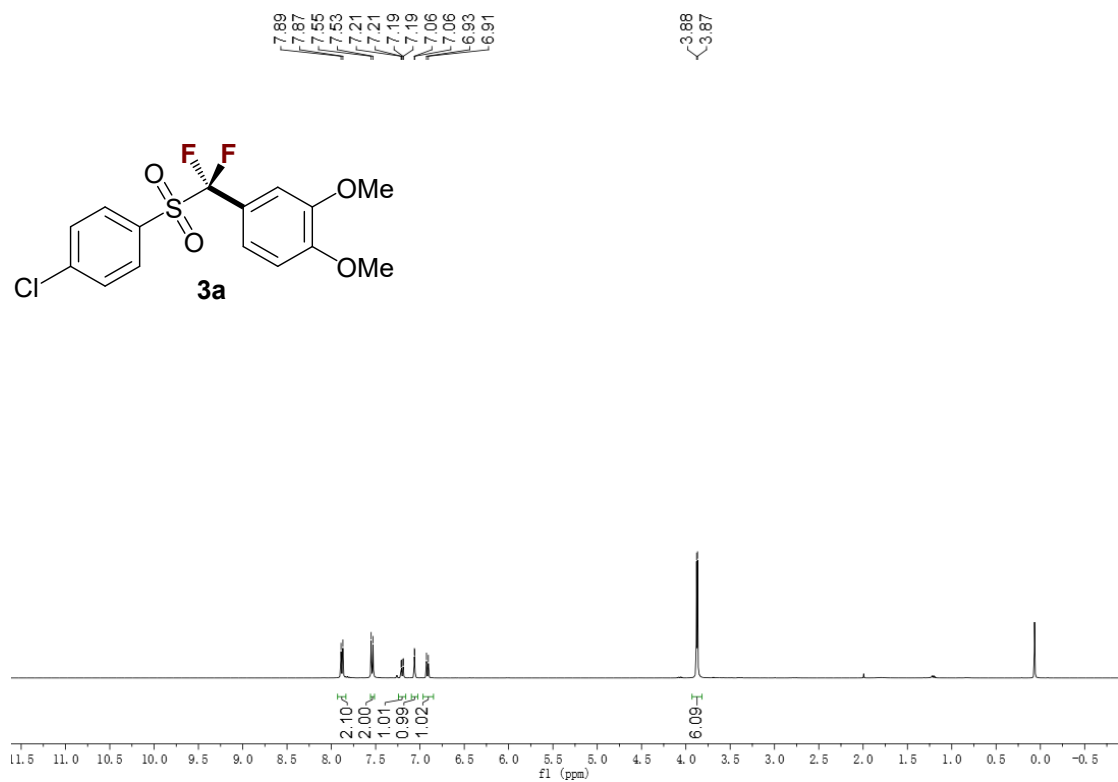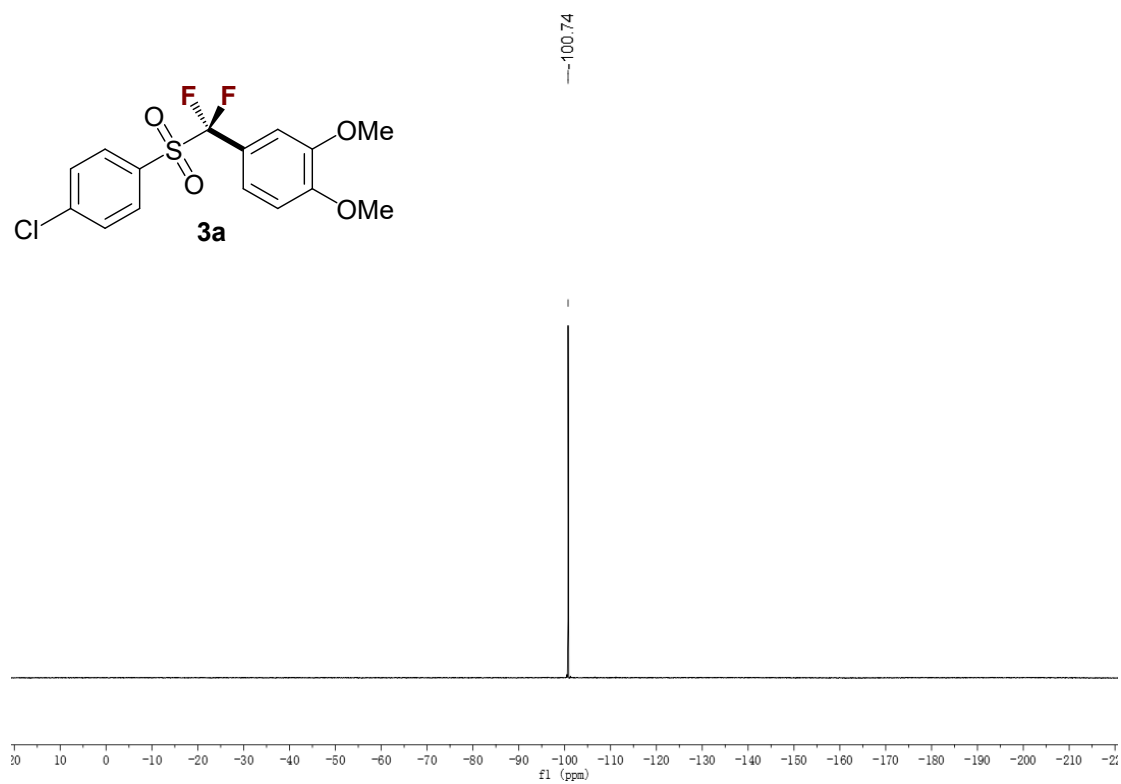

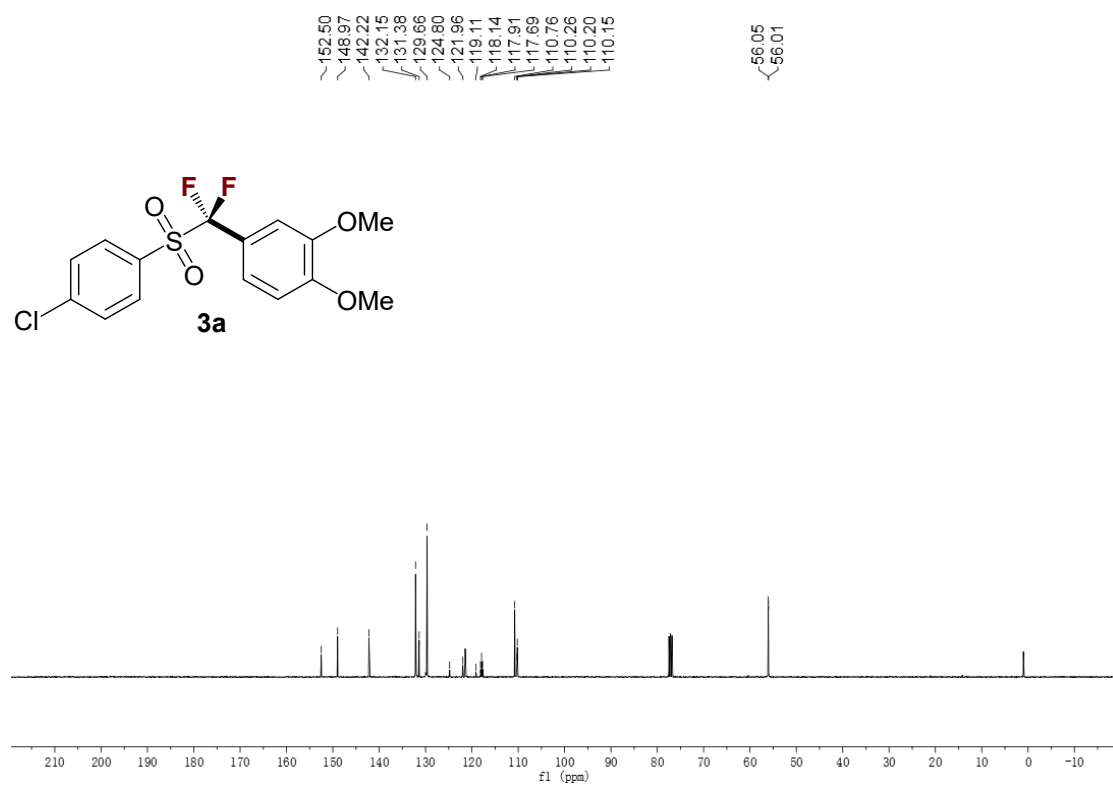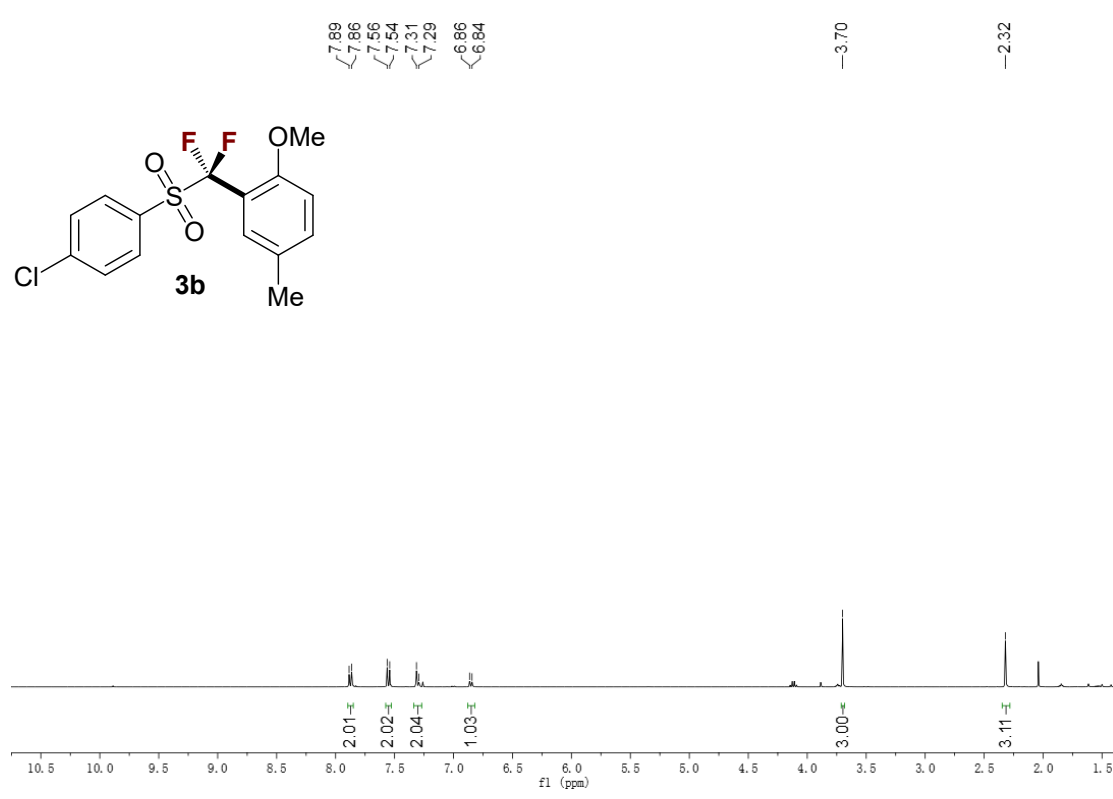

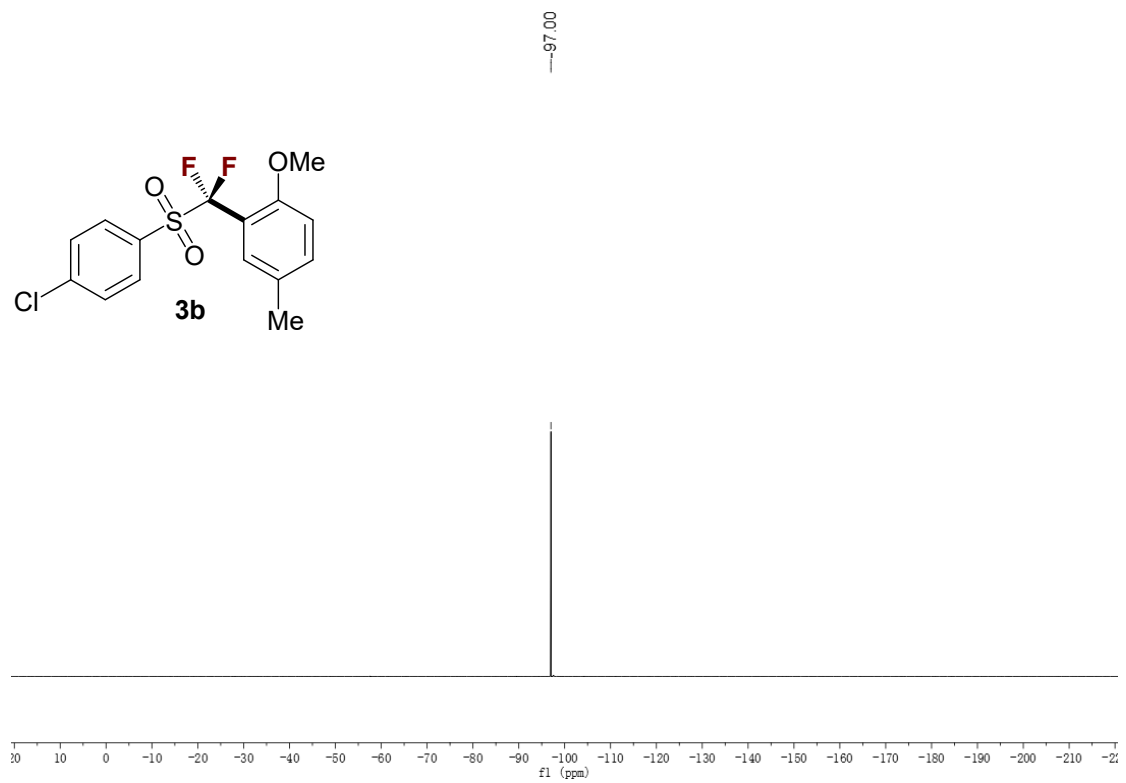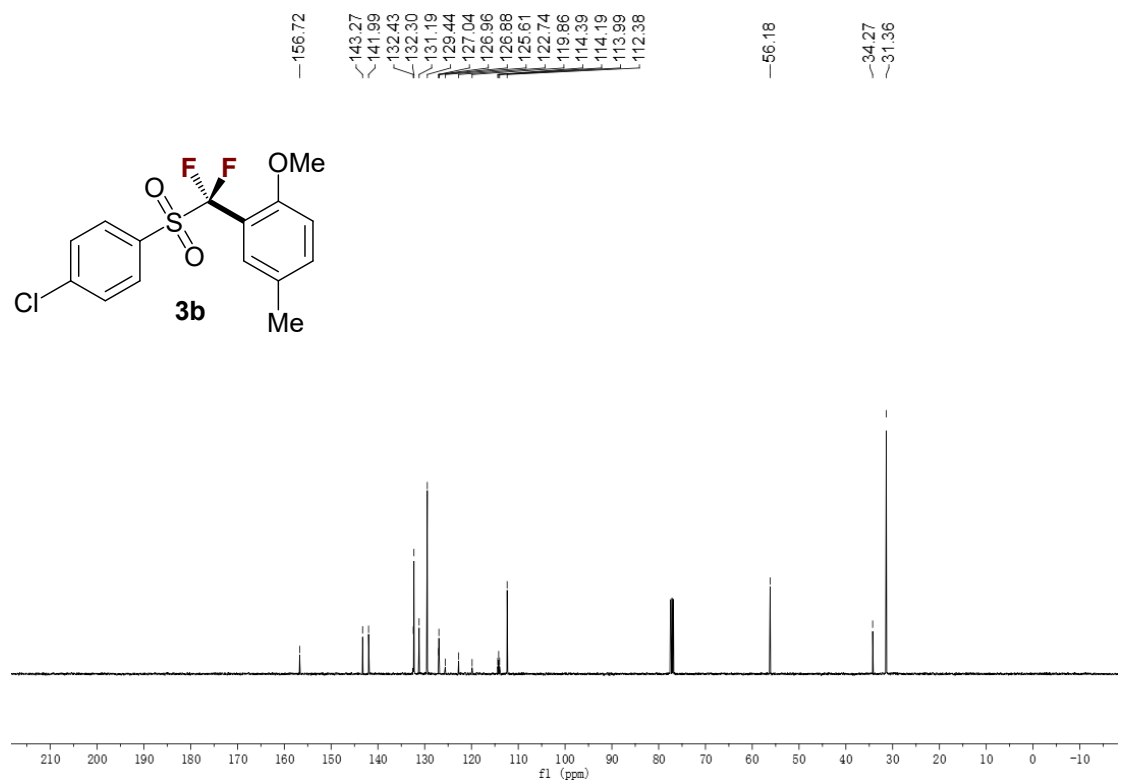

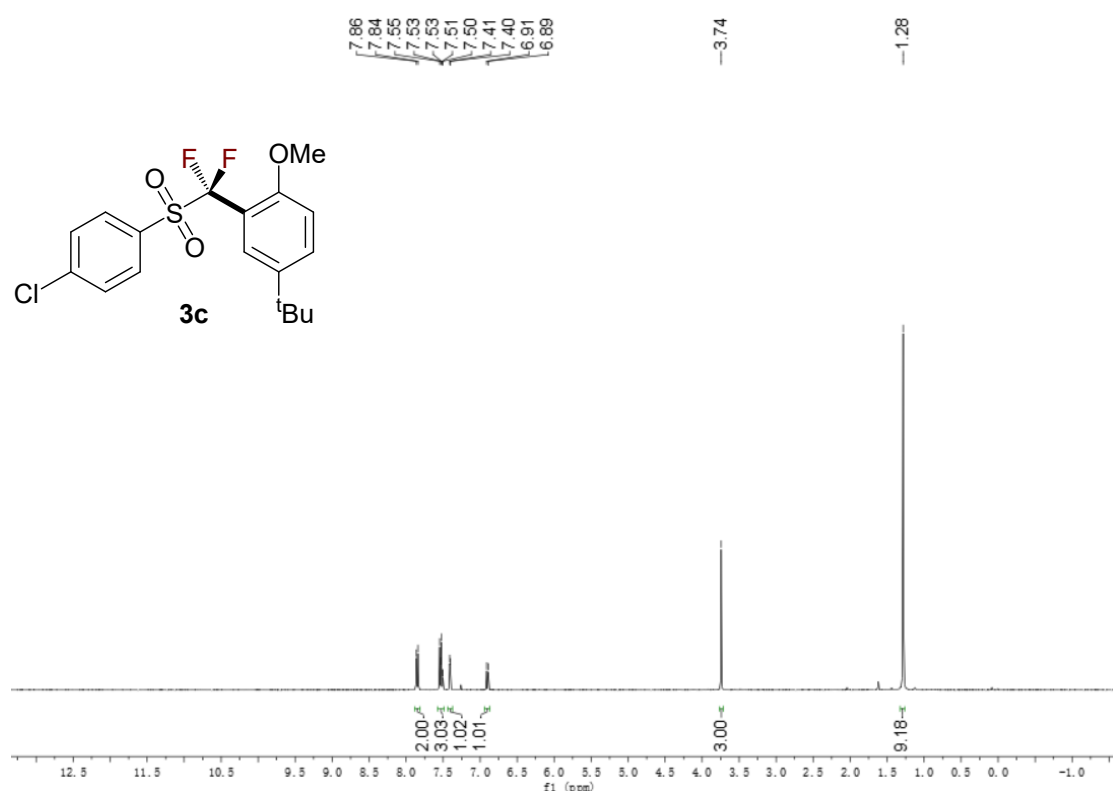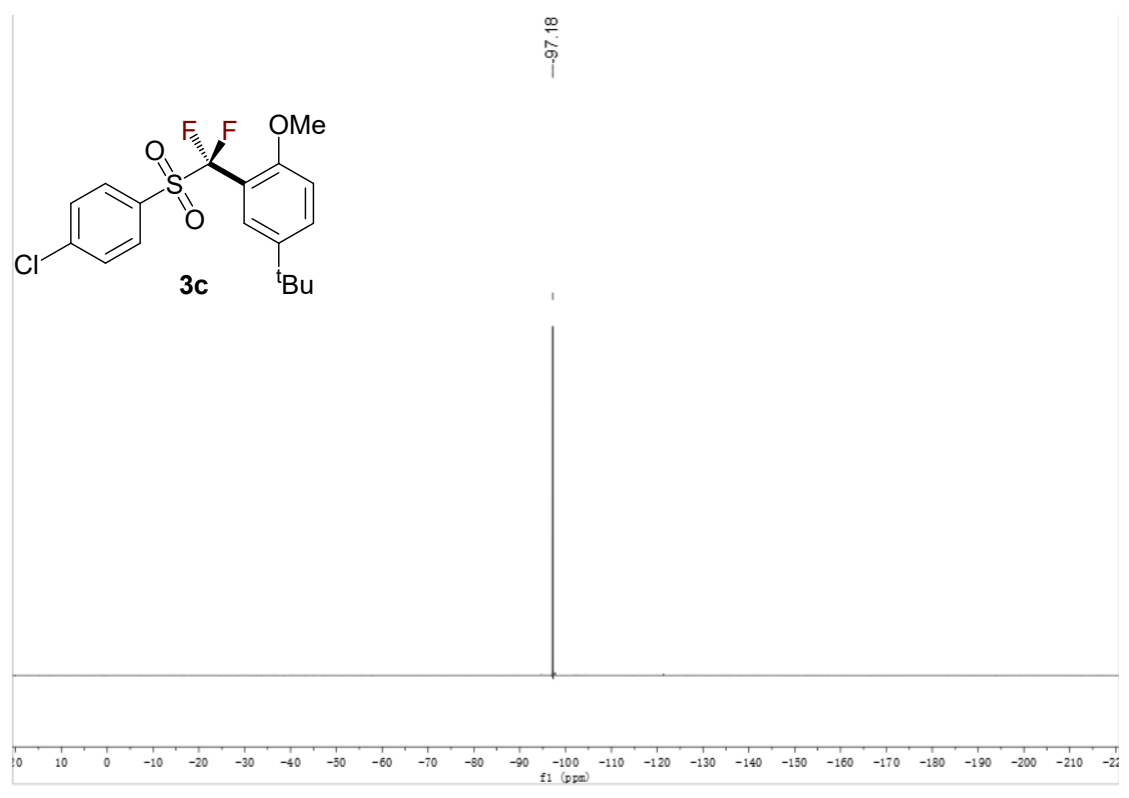

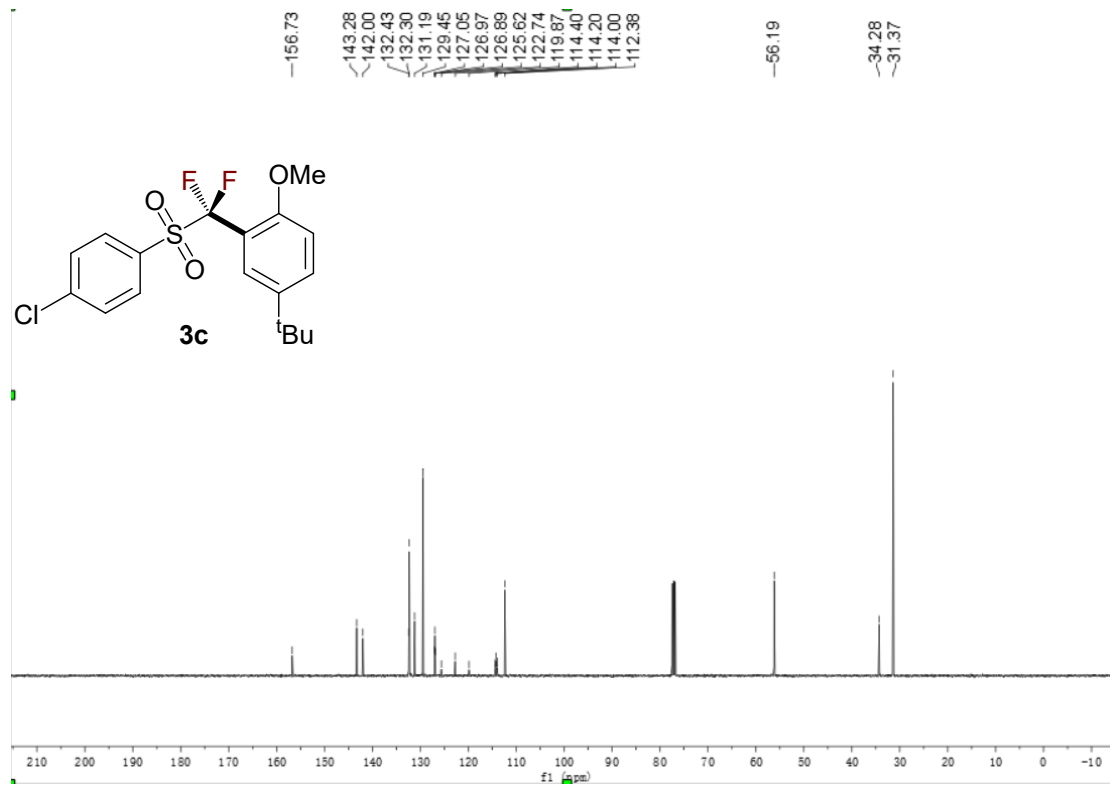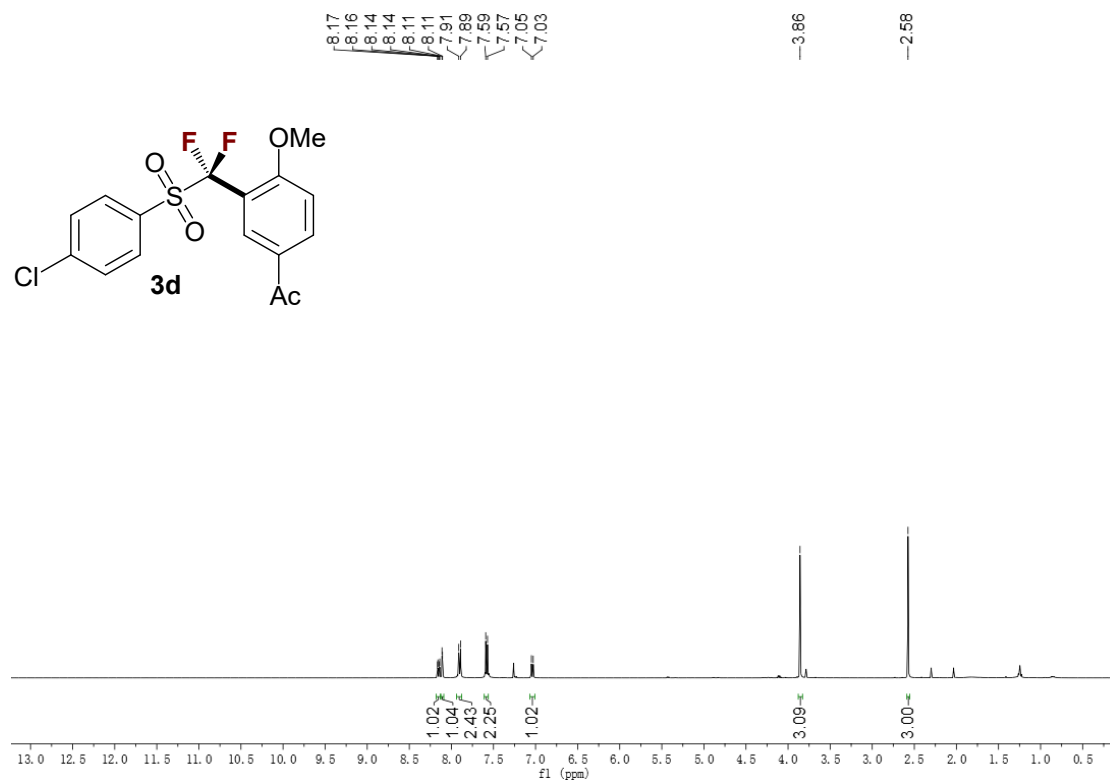



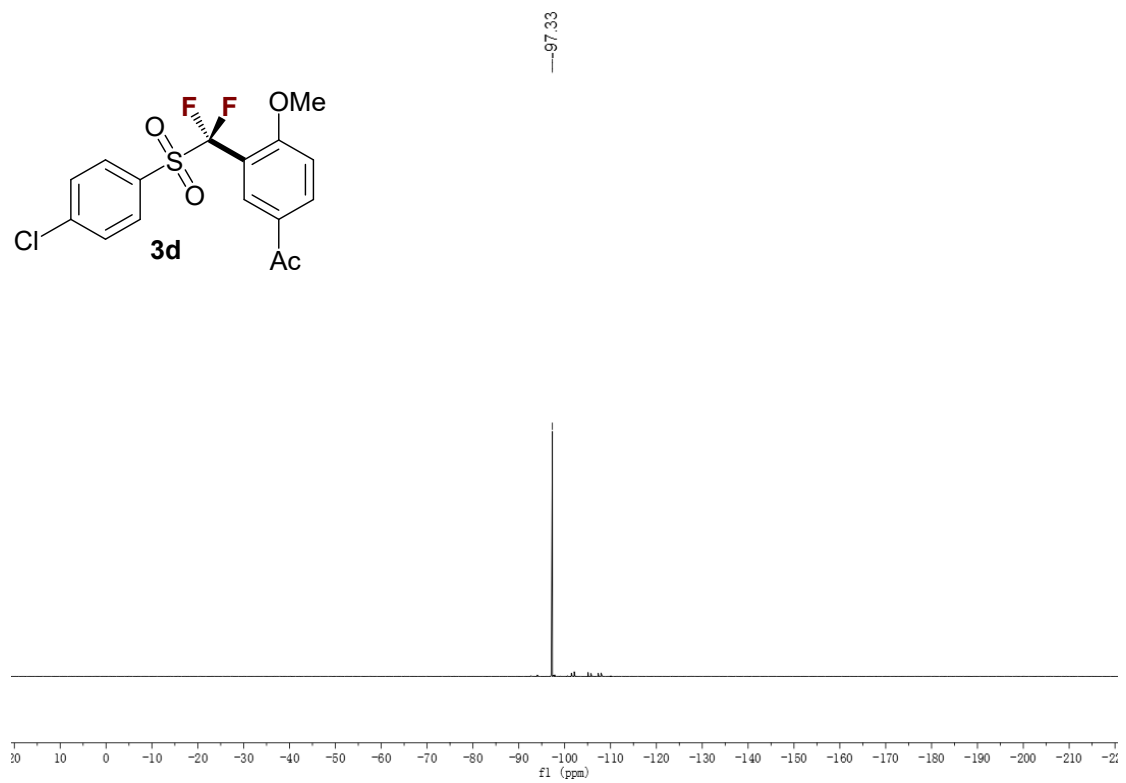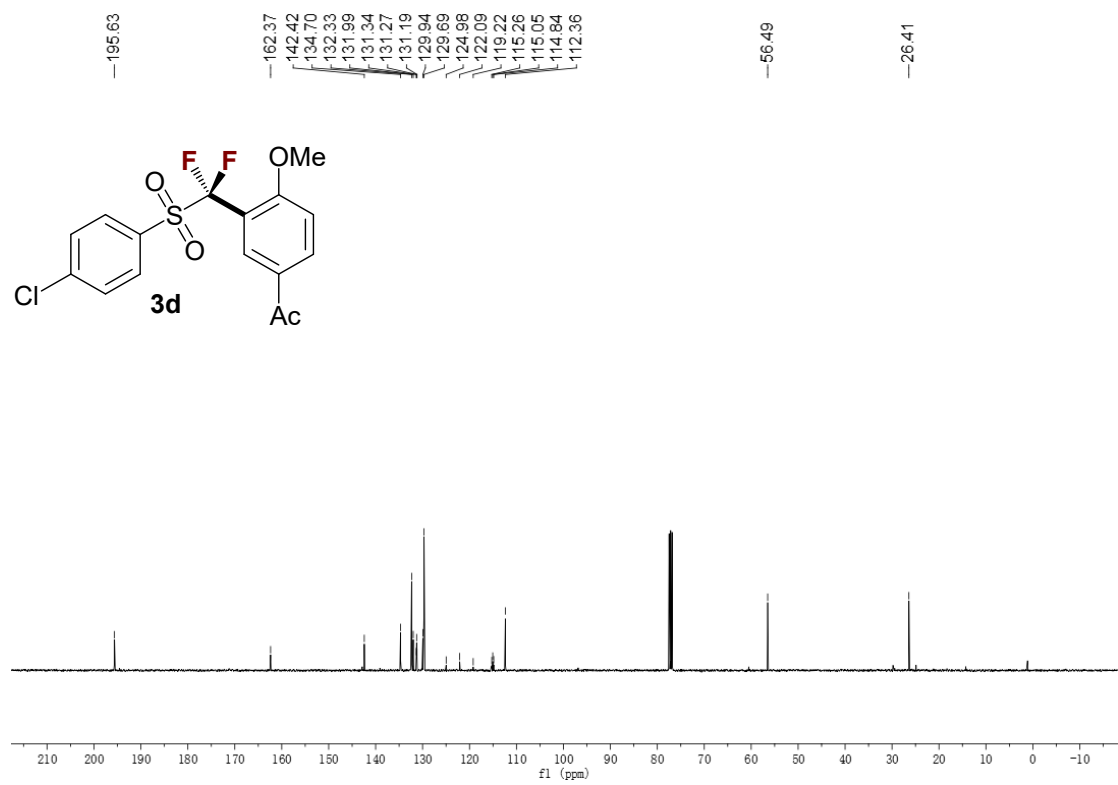

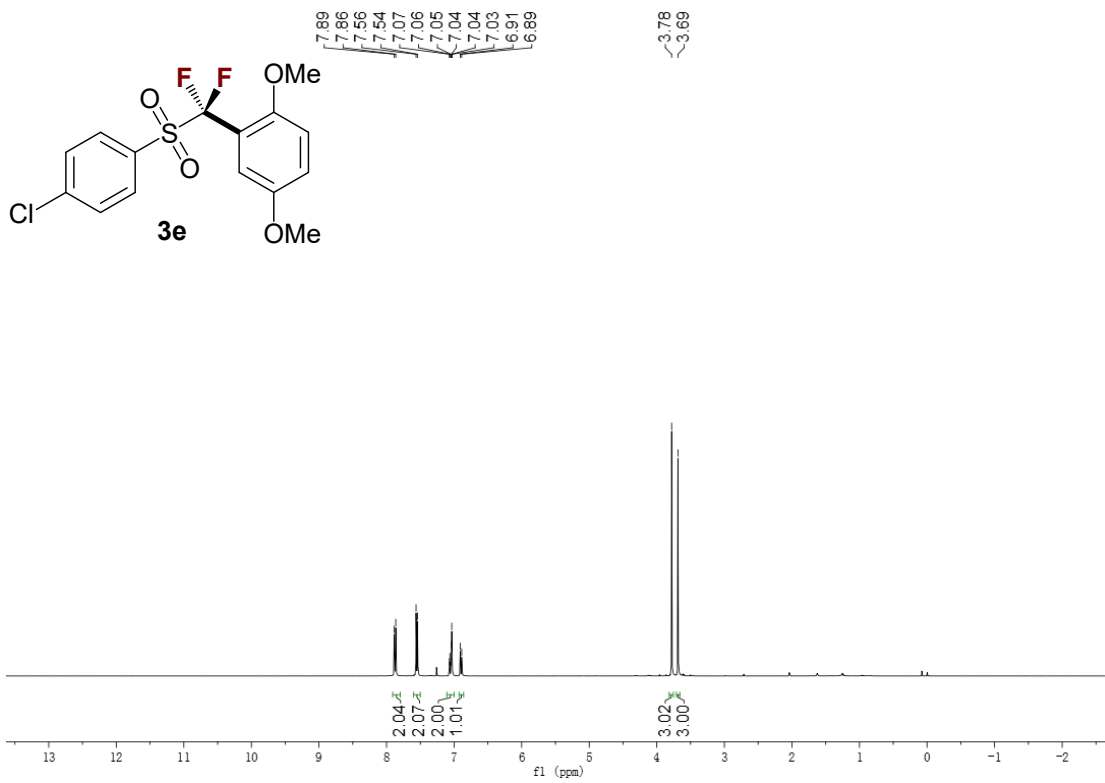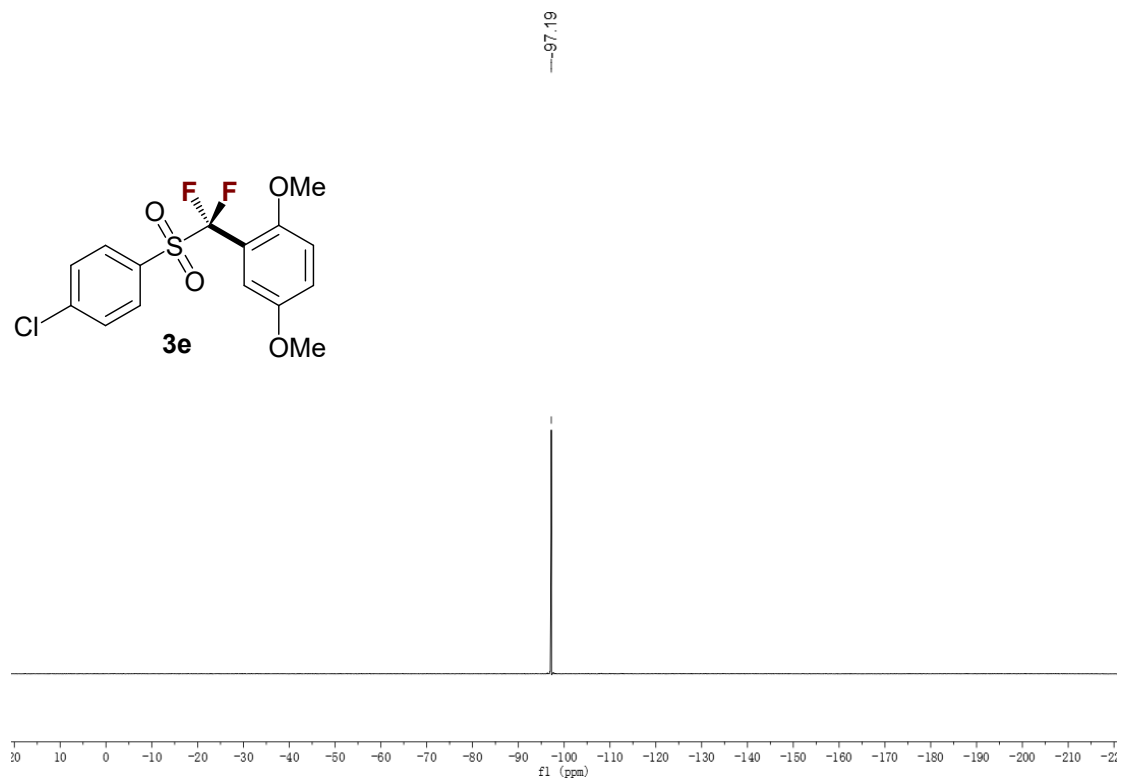

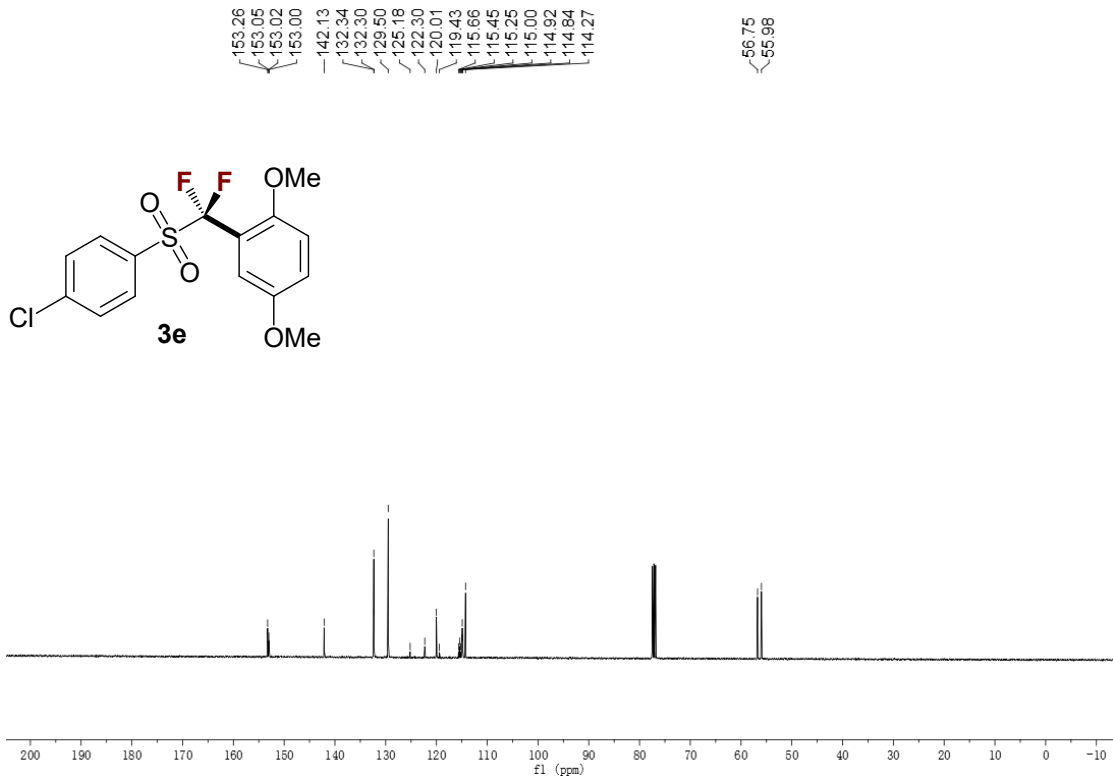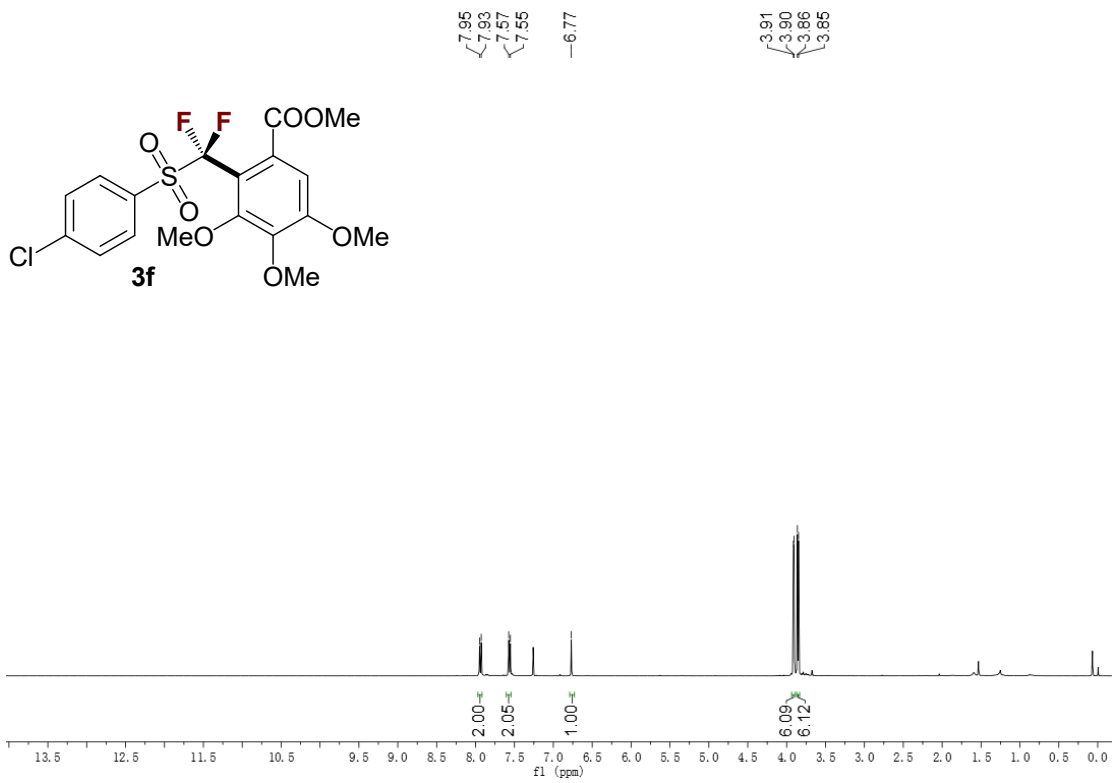

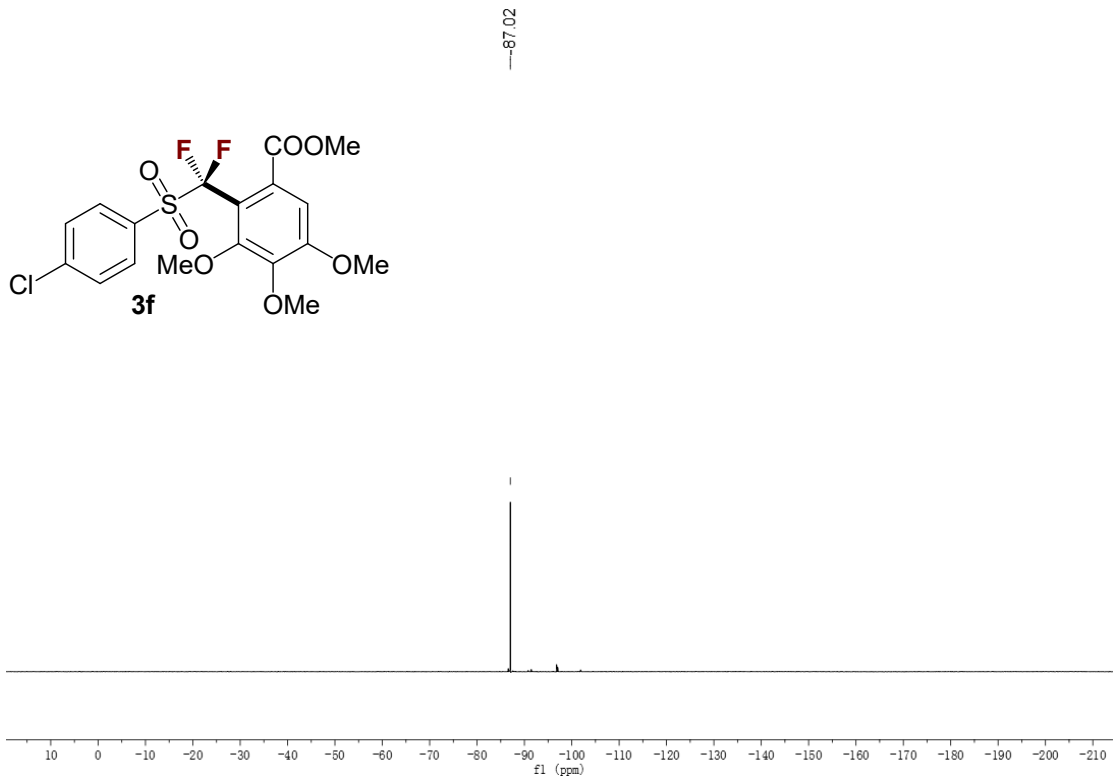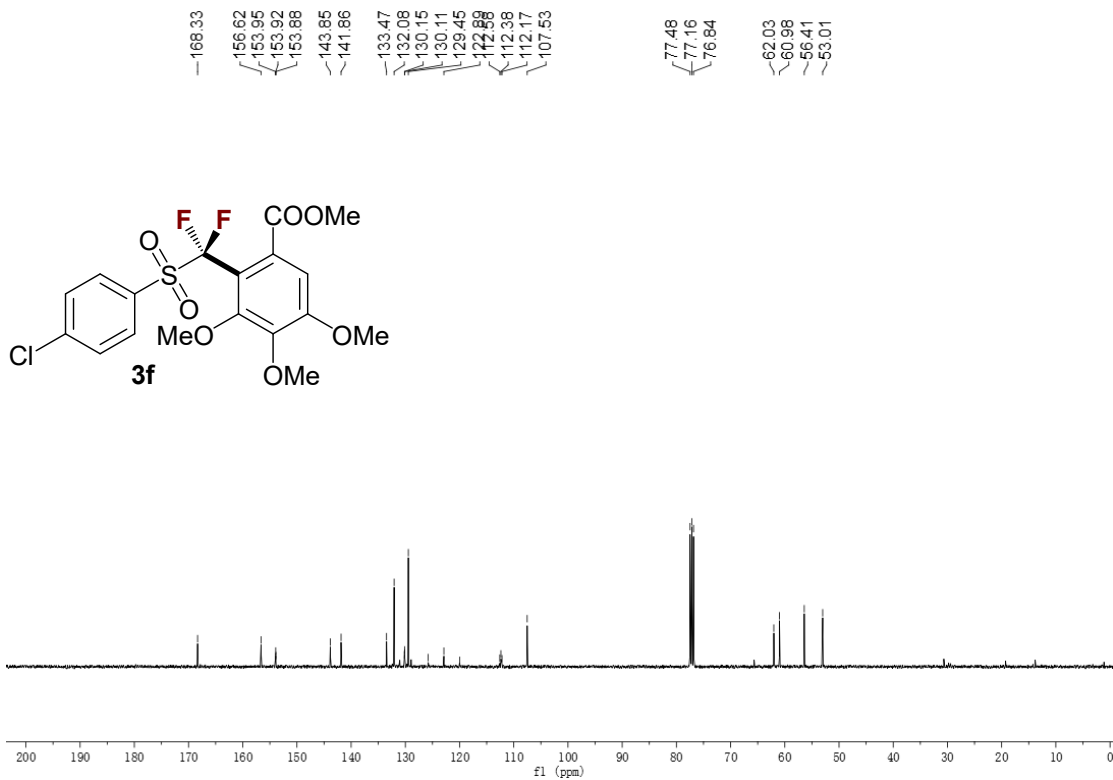

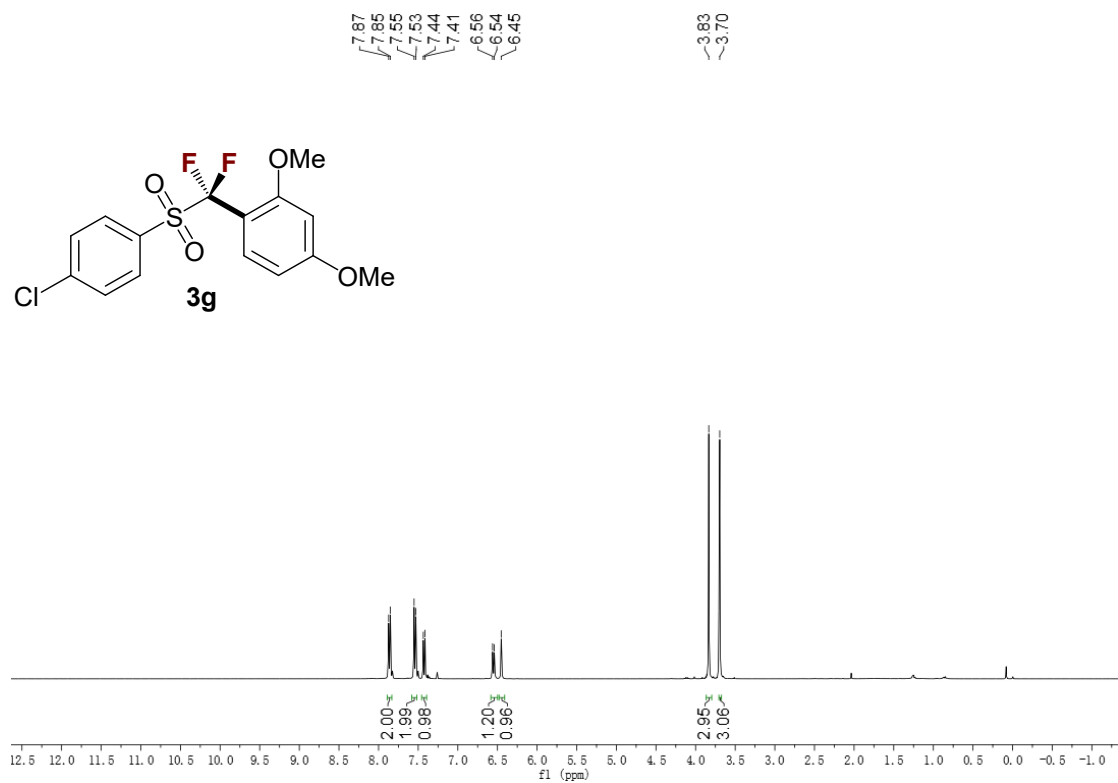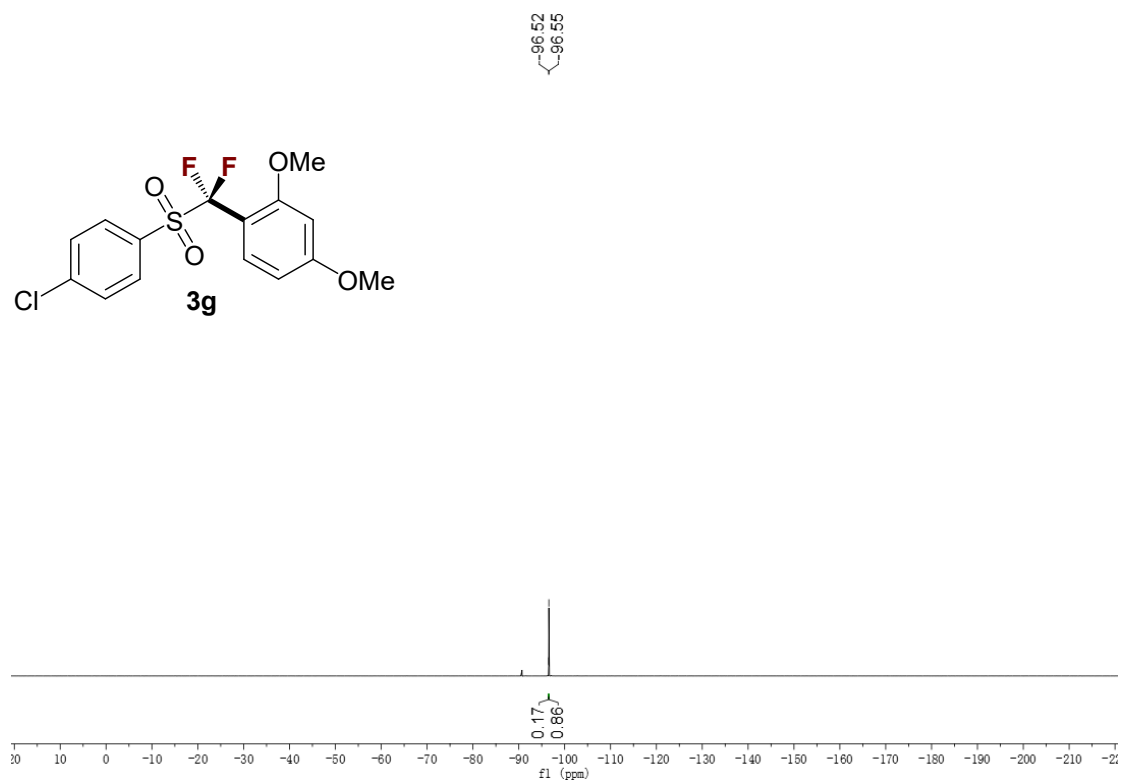

—164.61  
 —160.28  
 —141.90  
 {132.25  
 {131.66  
 {131.59  
 {131.51  
 {129.44  
 {125.66  
 {122.79  
 {119.92  
 {107.26  
 {107.05  
 {106.84  
 {105.05  
 {99.54  
 {55.95  
 {55.65

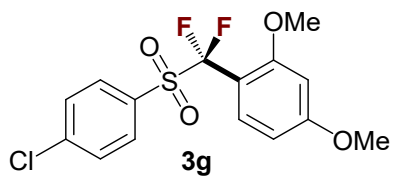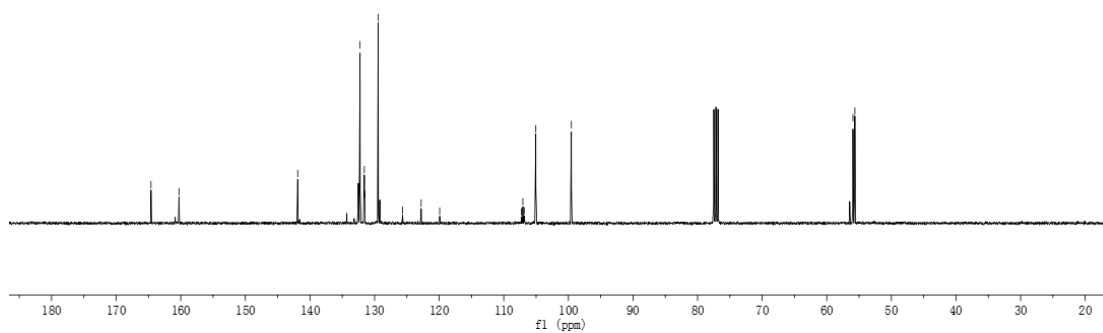

{7.94  
 {7.92  
 {7.67  
 {7.65  
 {7.61  
 {7.59  
 {7.53  
 {7.51  
 {7.49

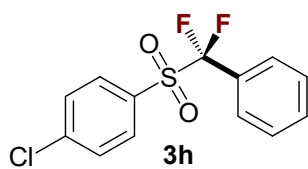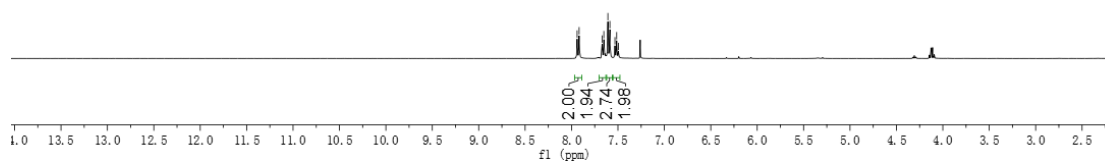

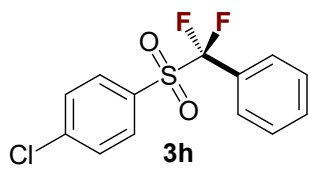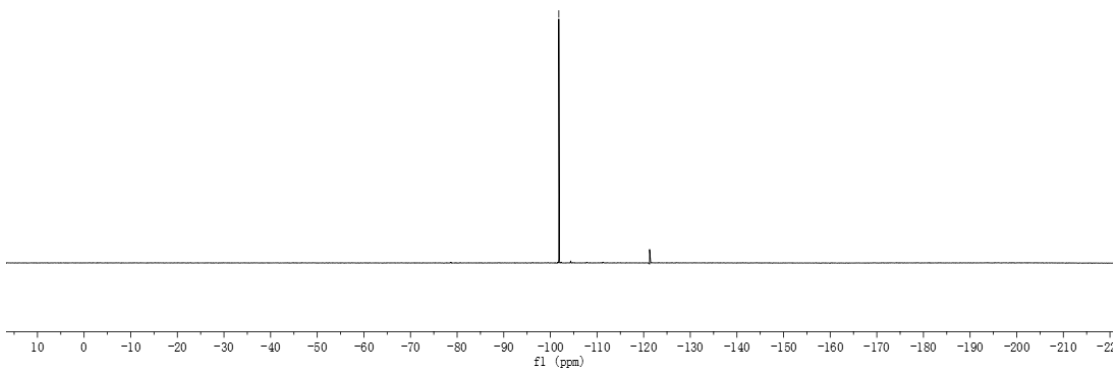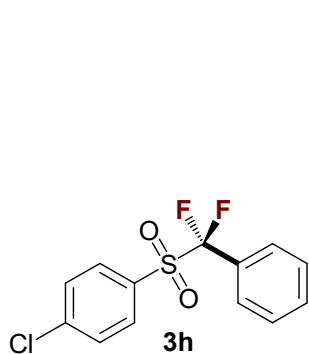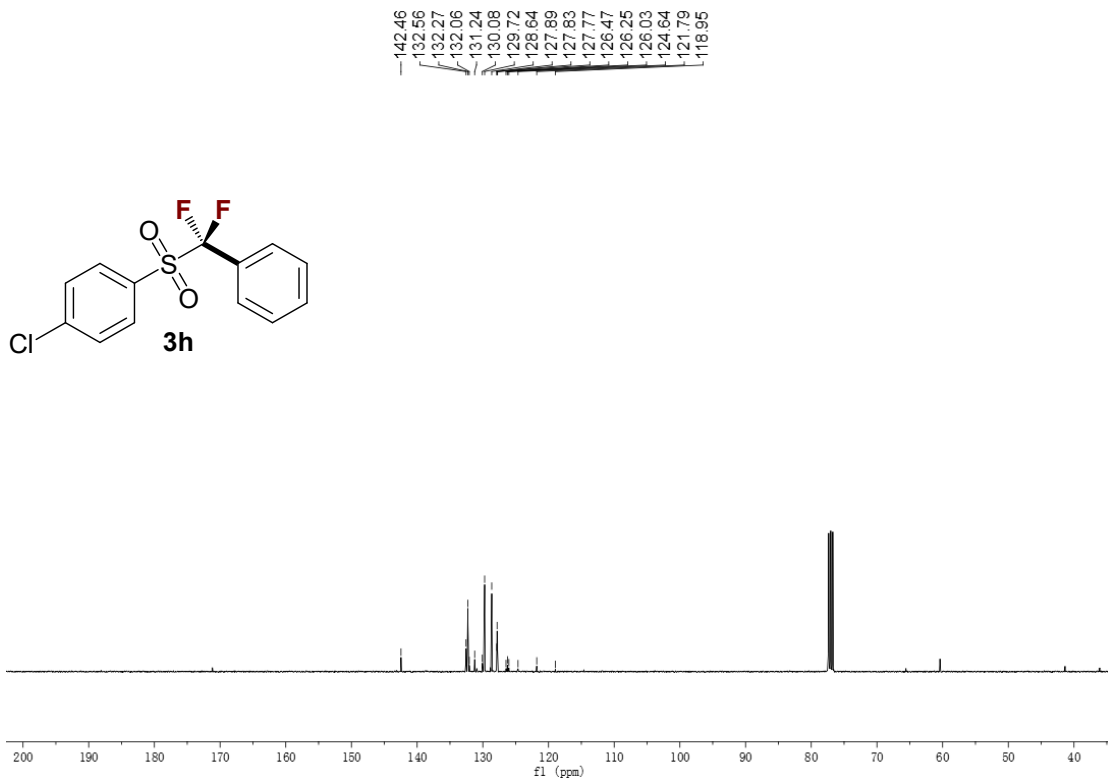

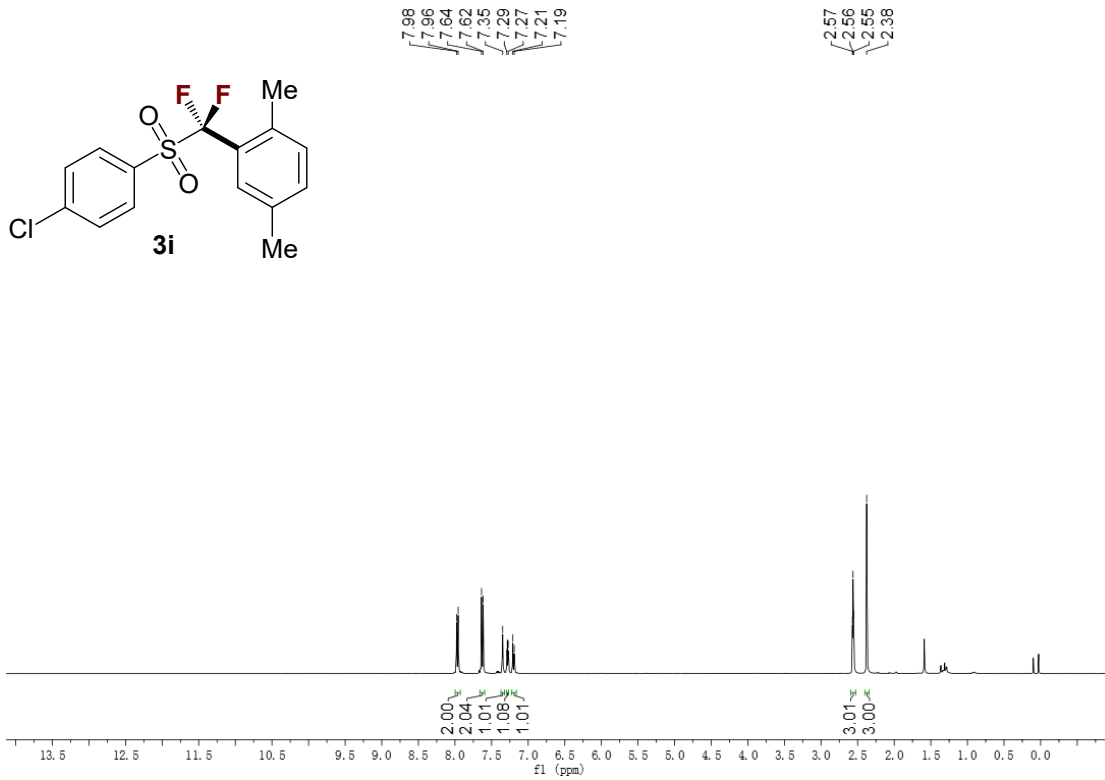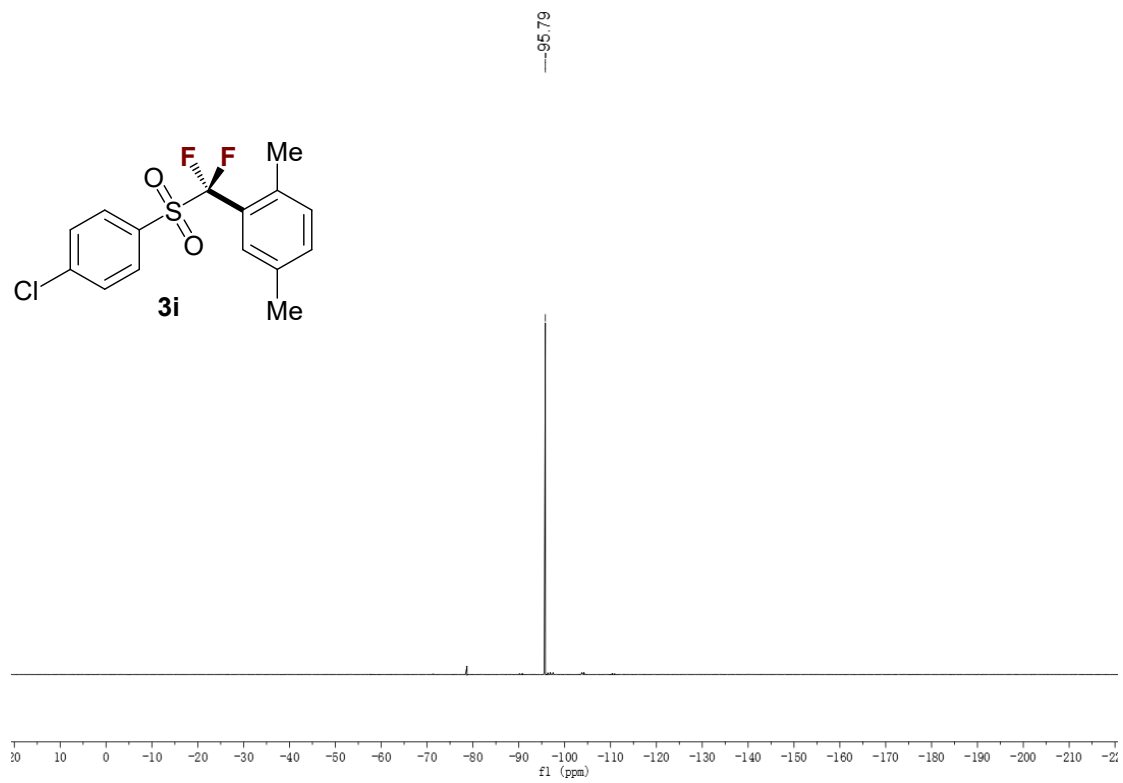



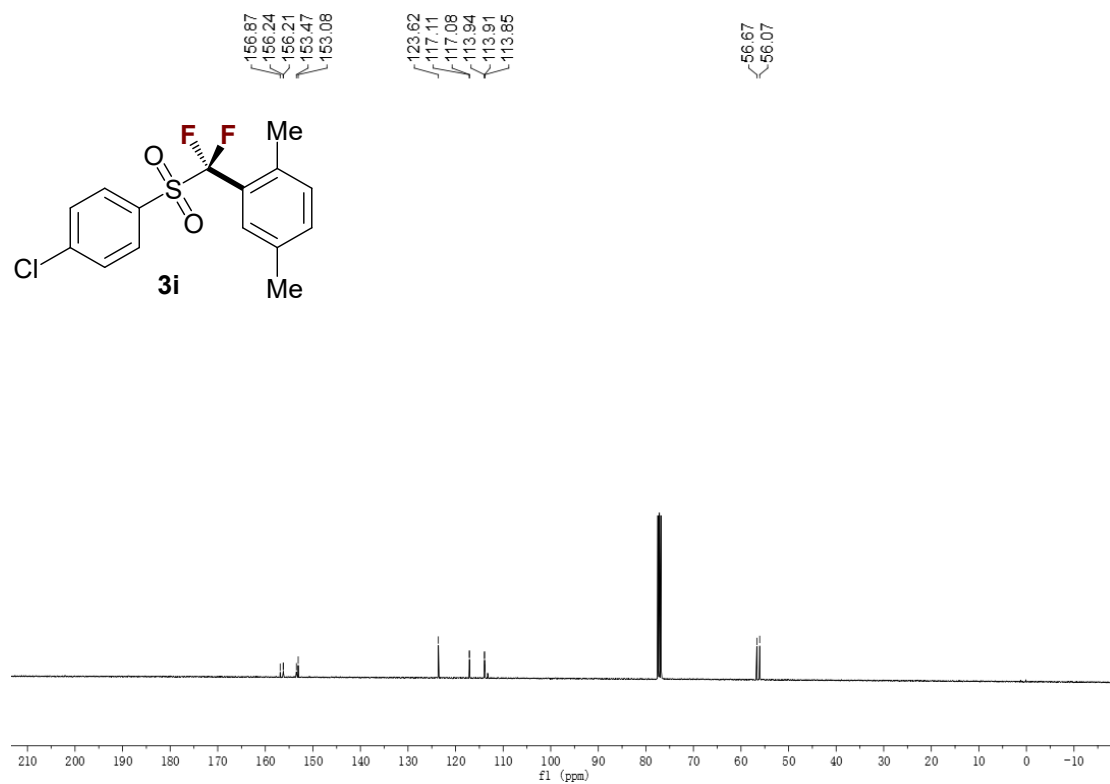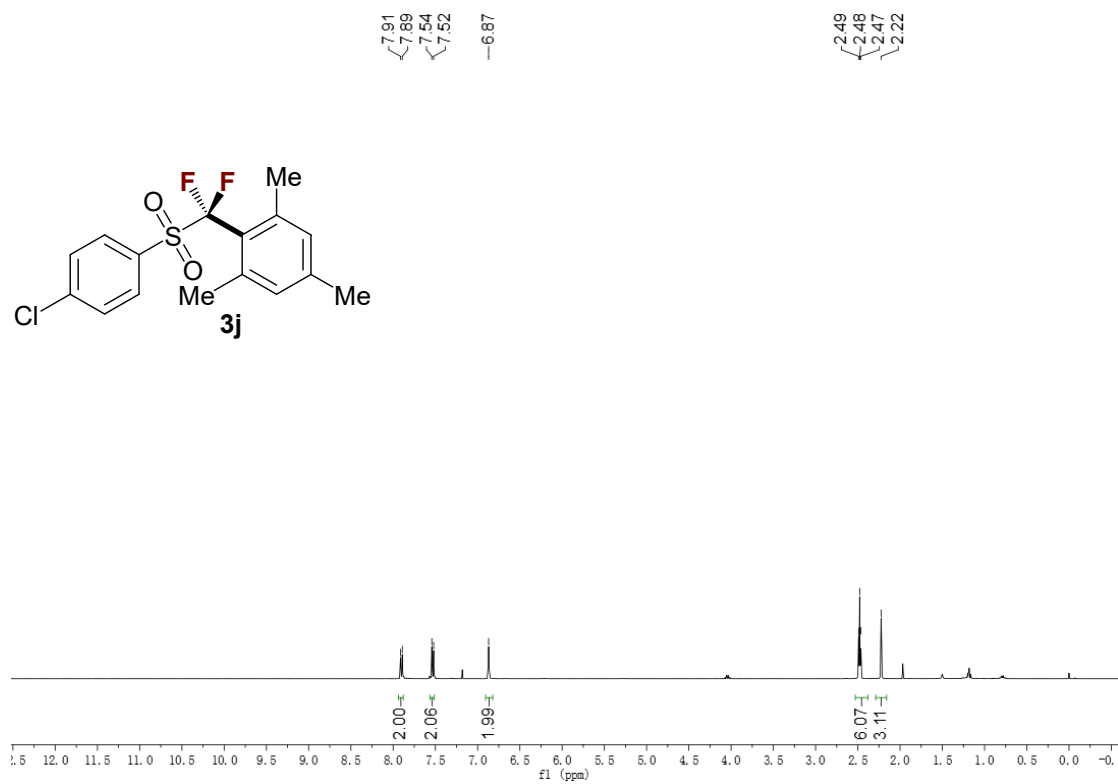

--87.44

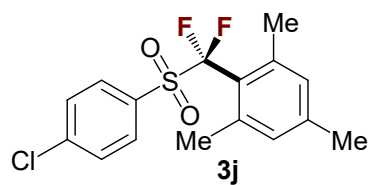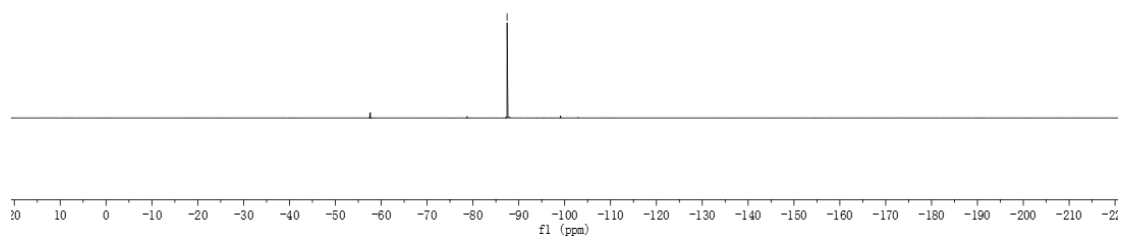

142.26  
142.19  
140.79  
140.75  
140.72  
132.29  
131.86  
129.79  
128.19  
125.31  
122.42  
120.69  
120.51  
120.33

22.57  
22.51  
22.44  
21.10

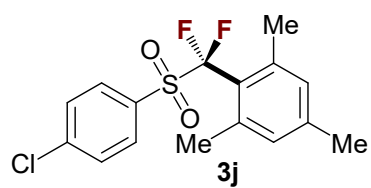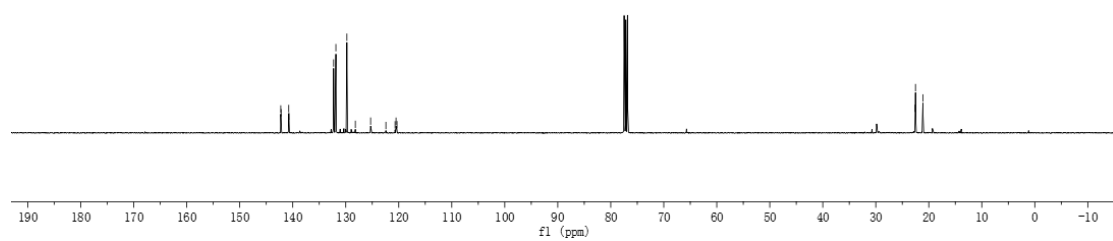

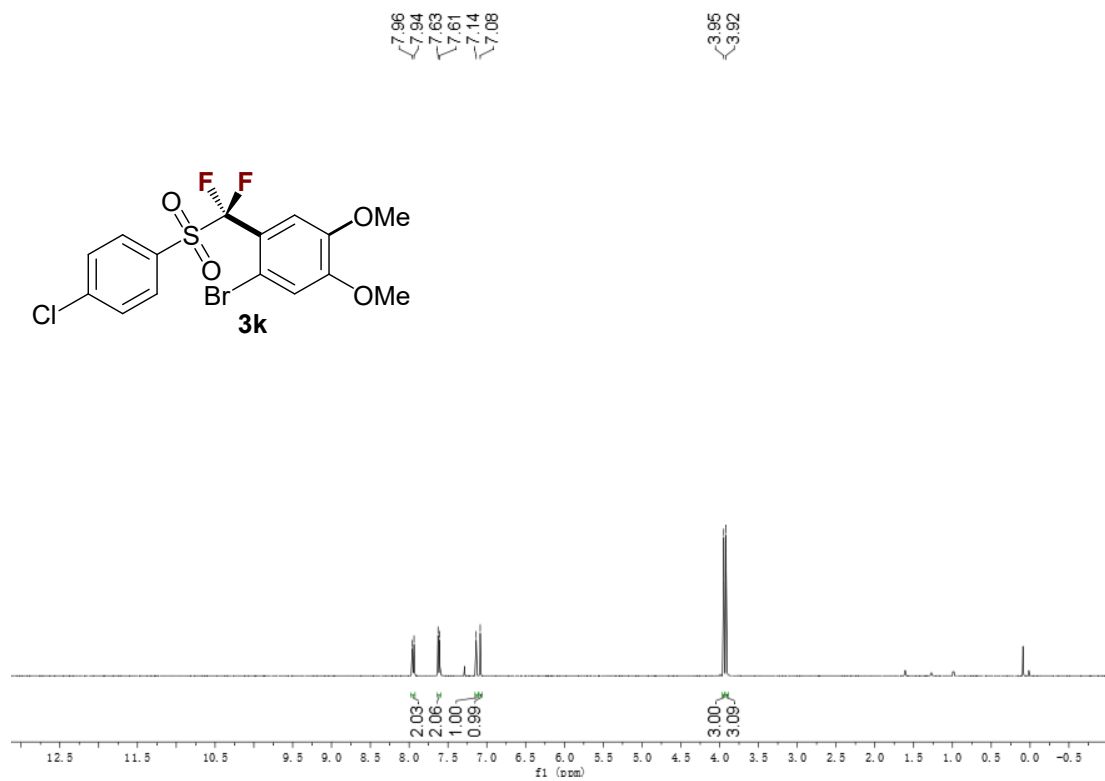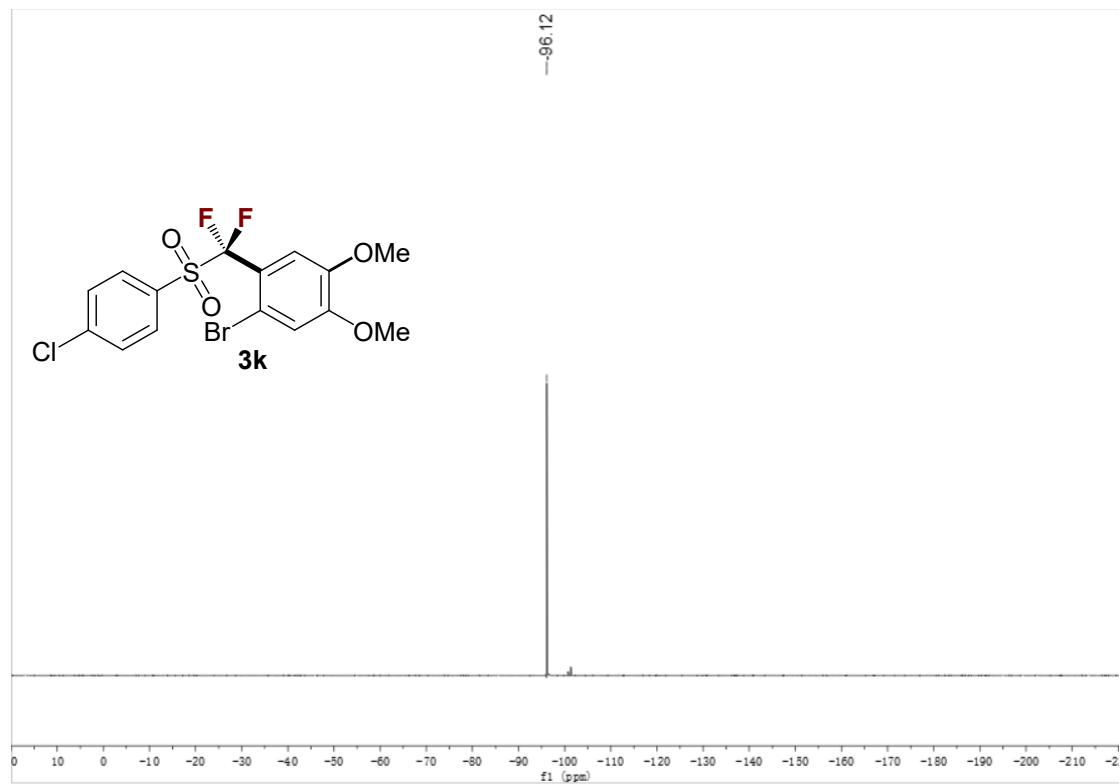

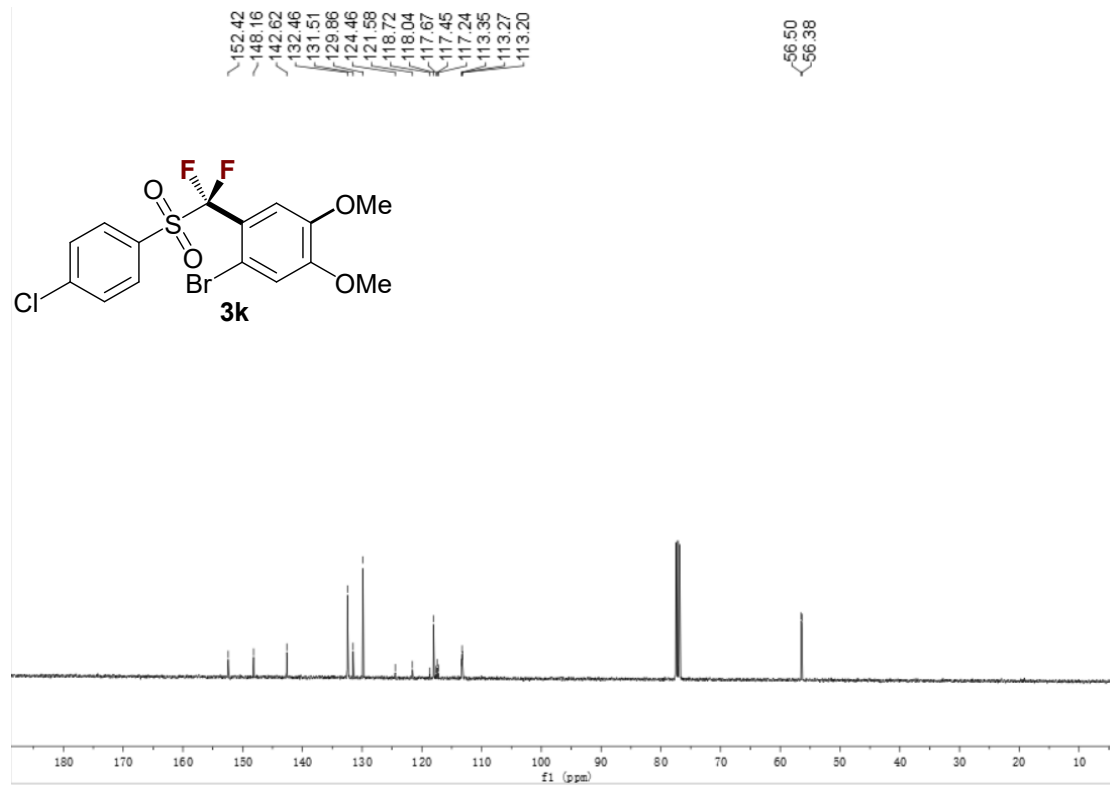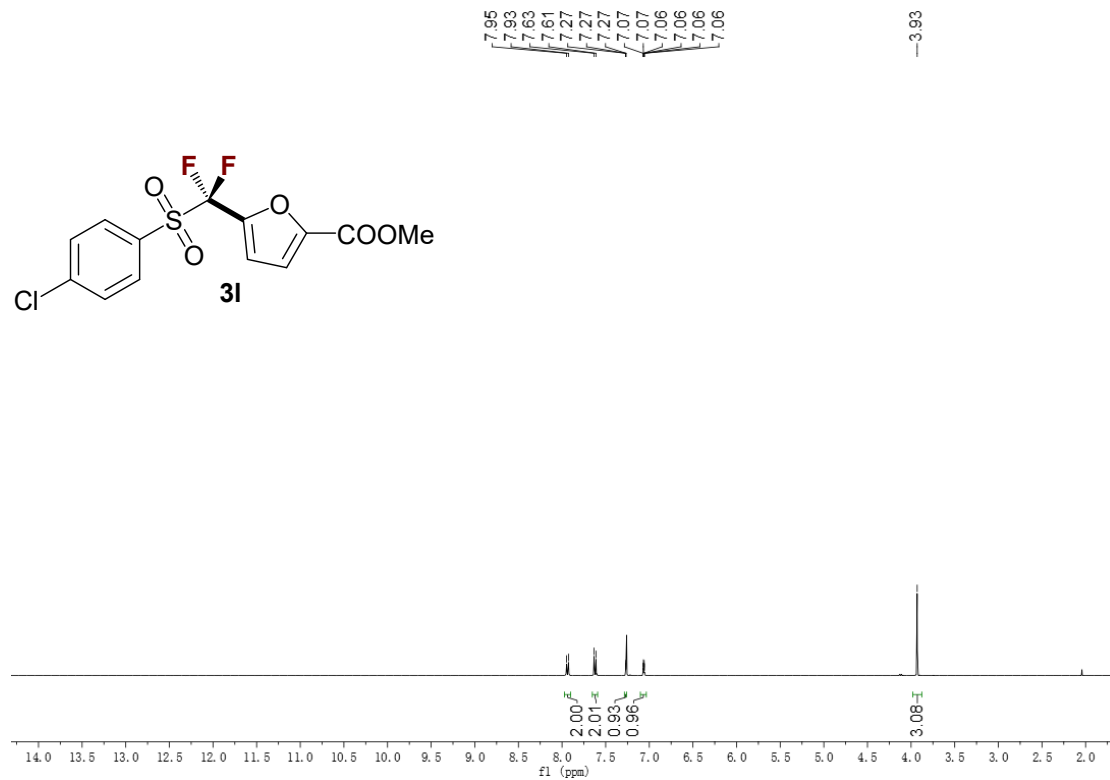

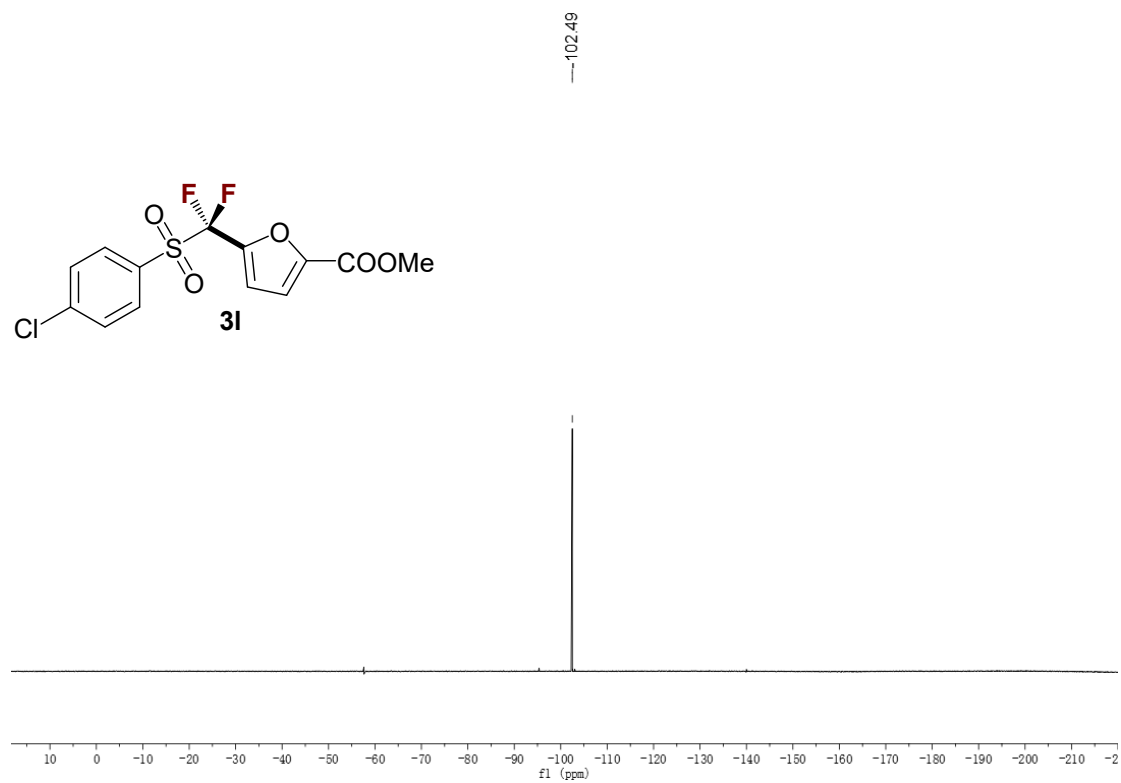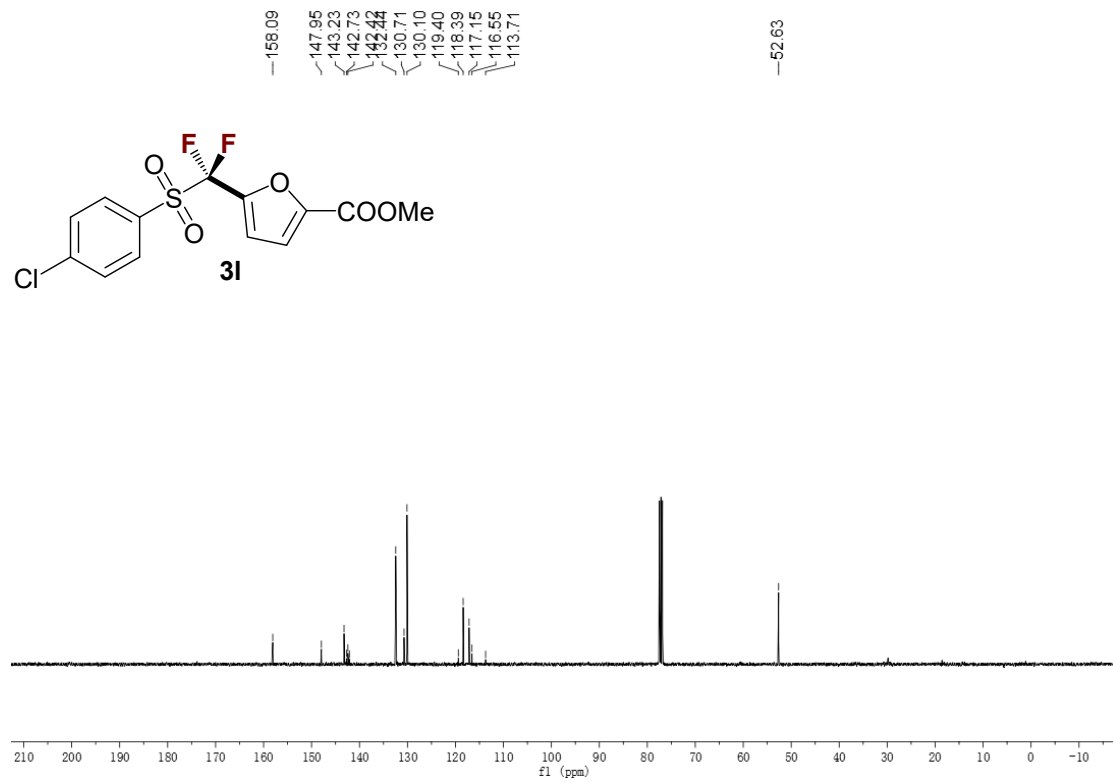

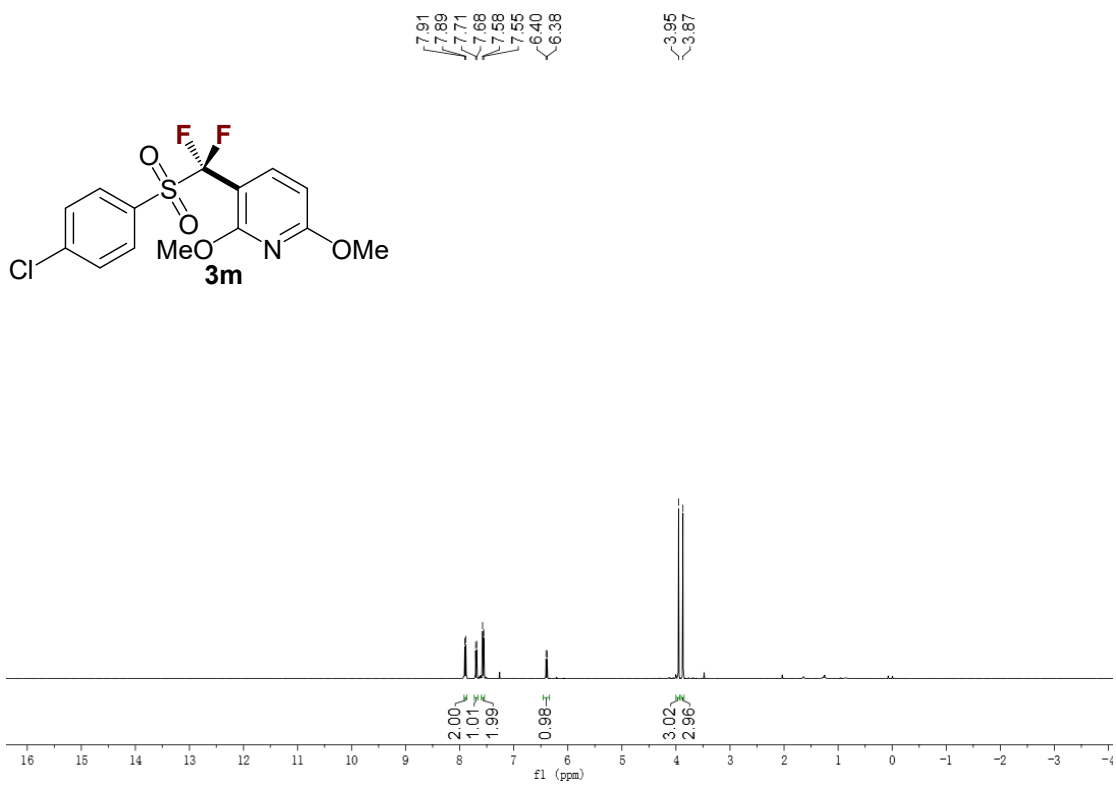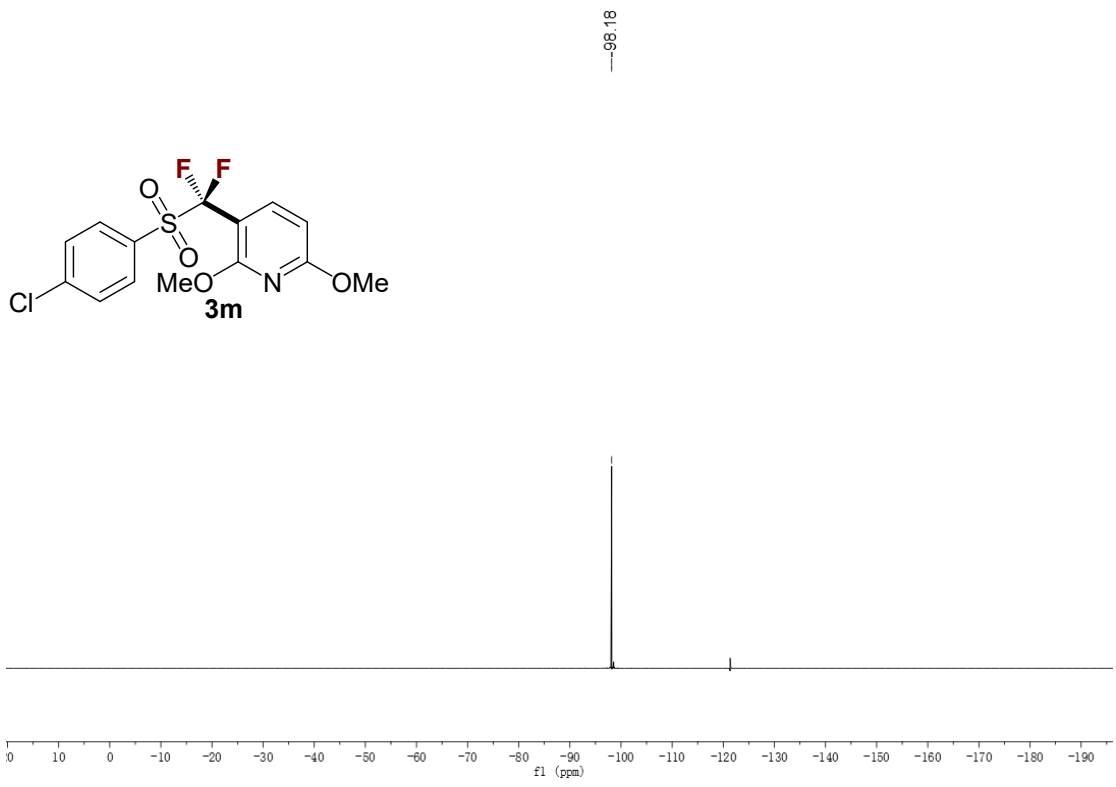

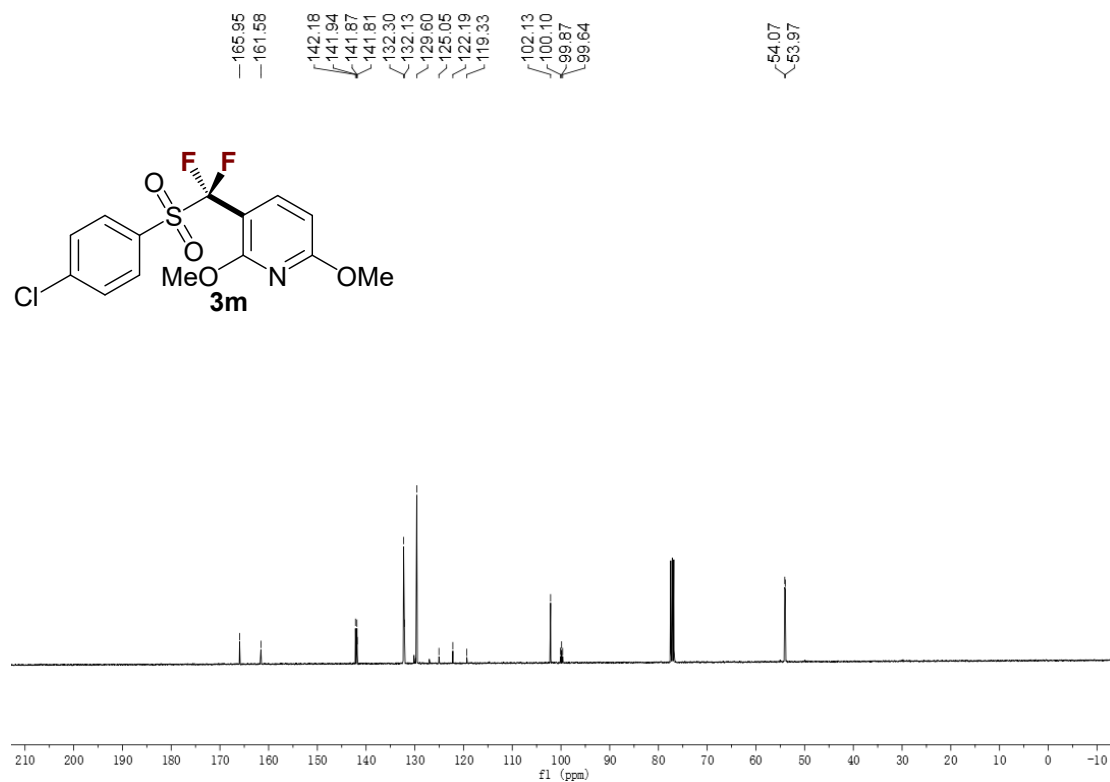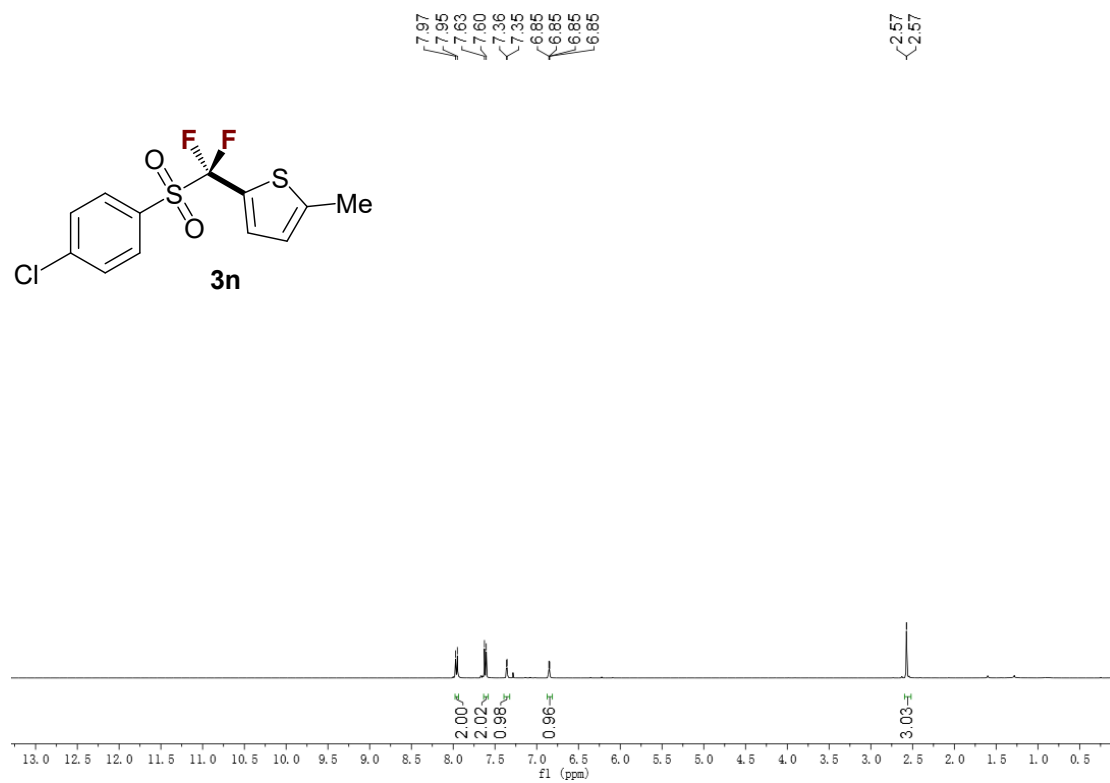

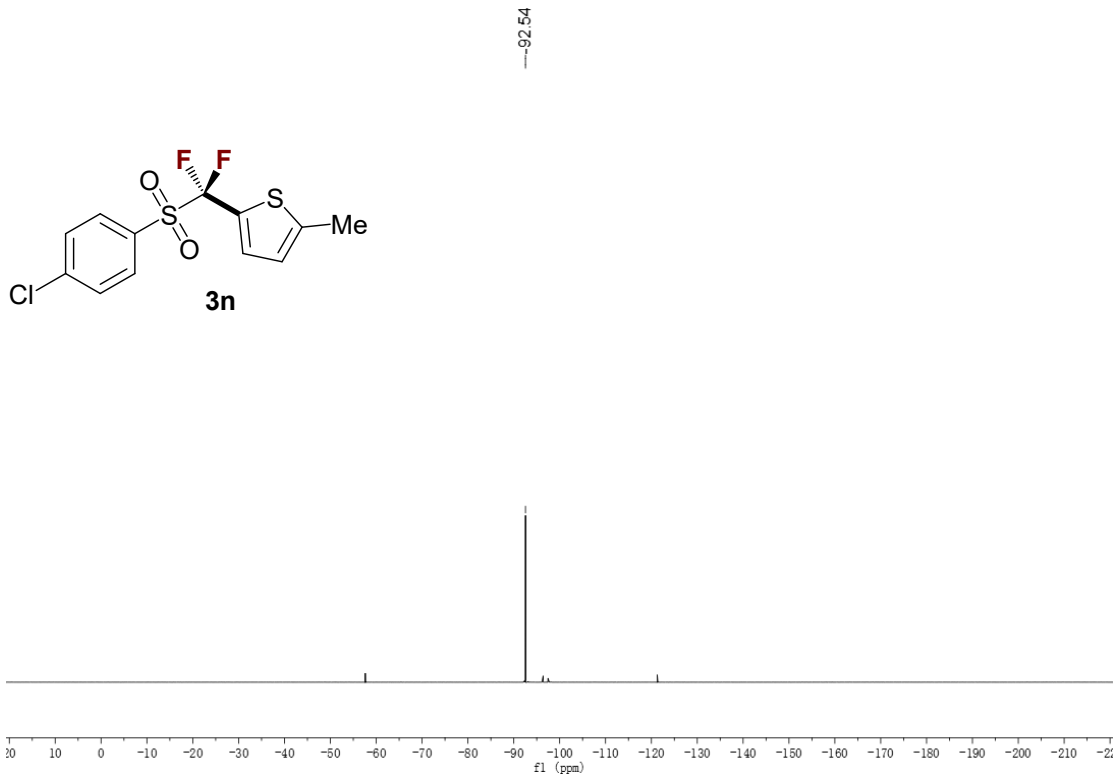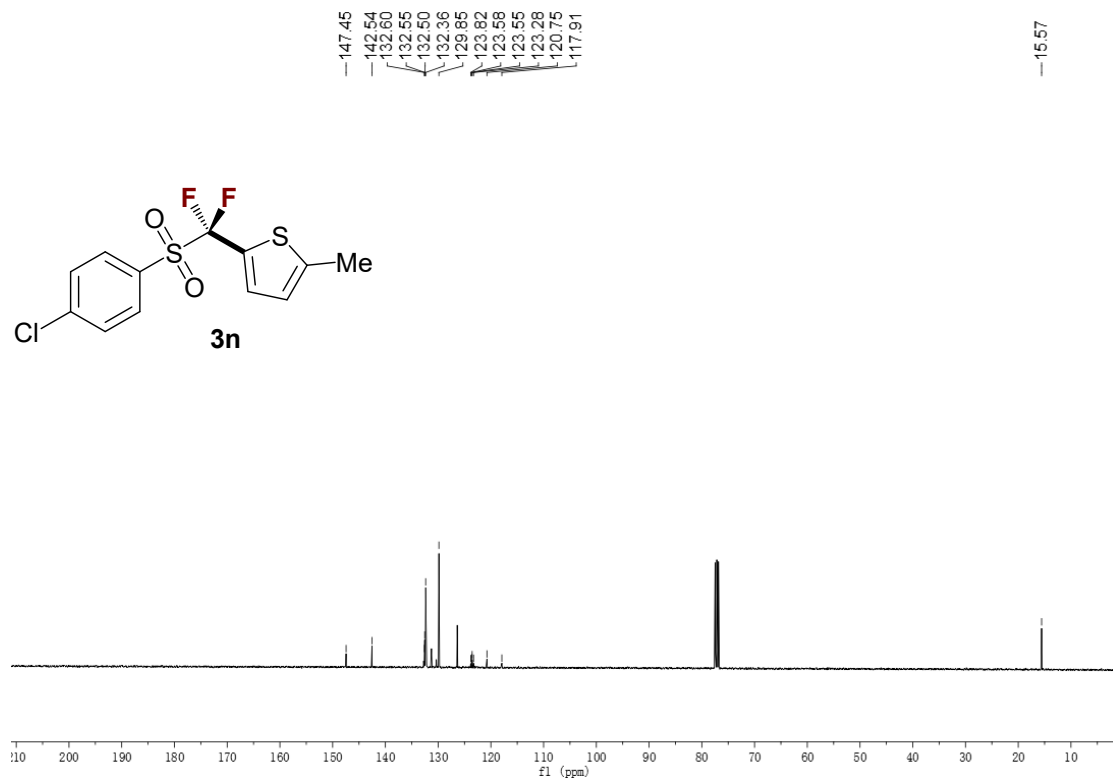



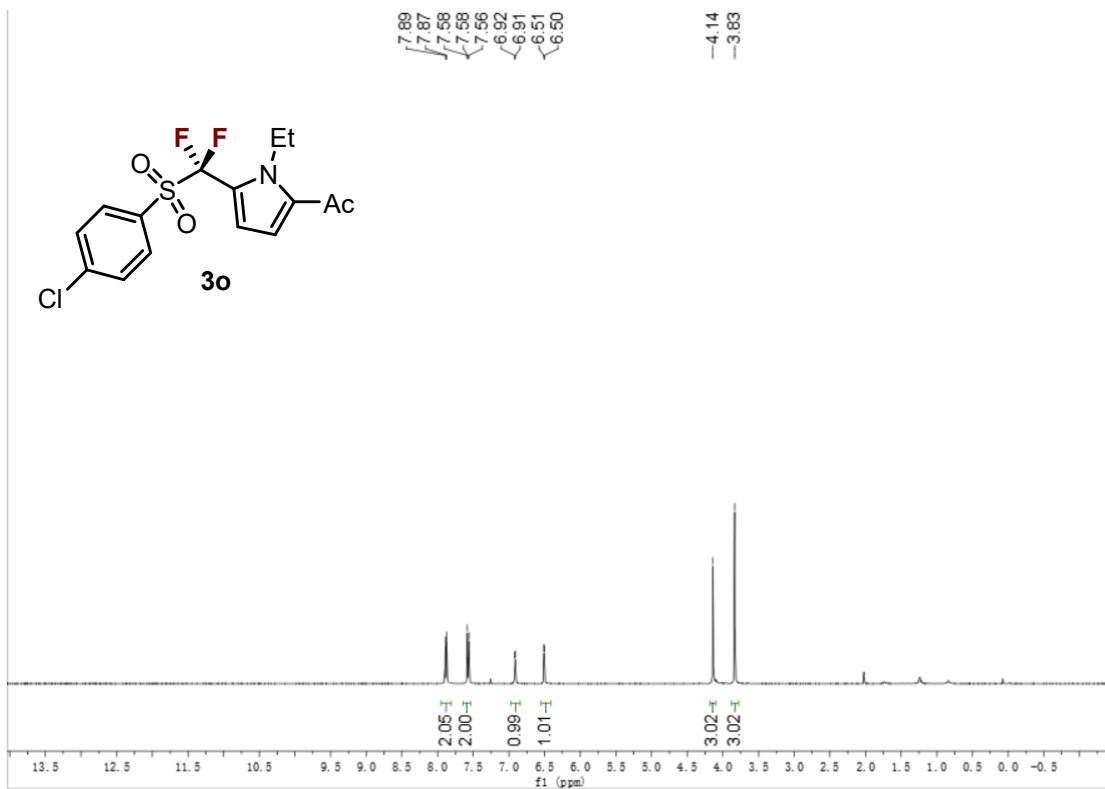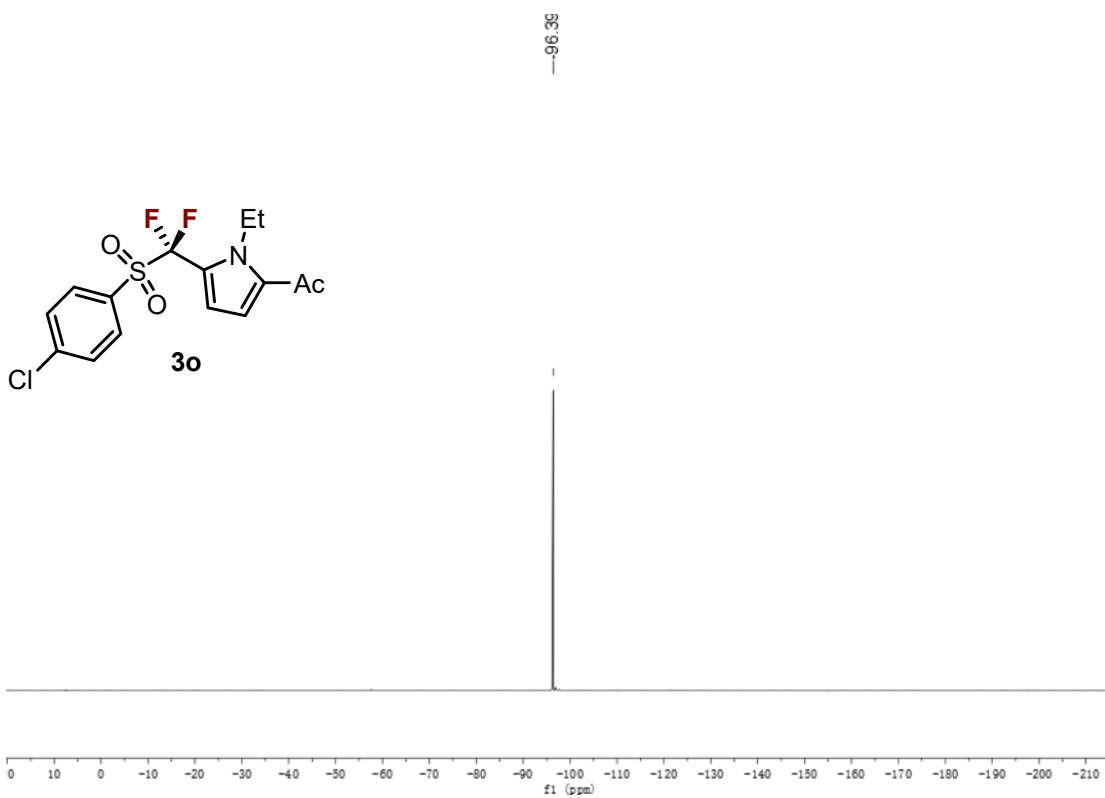

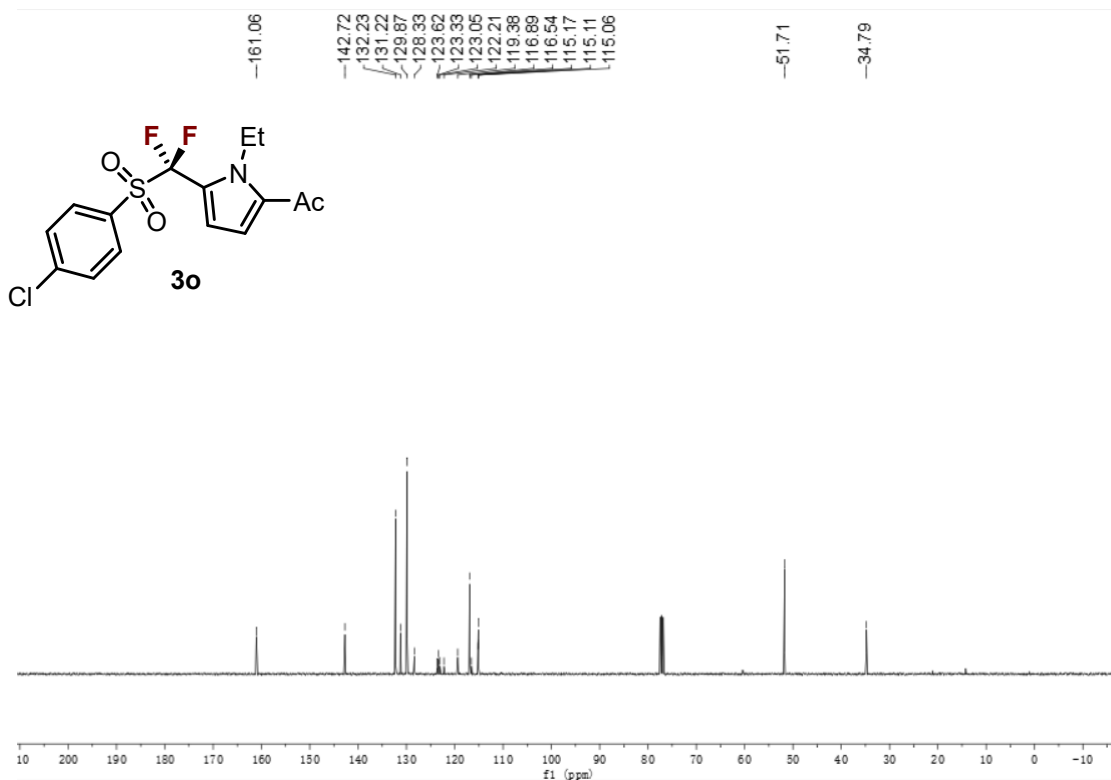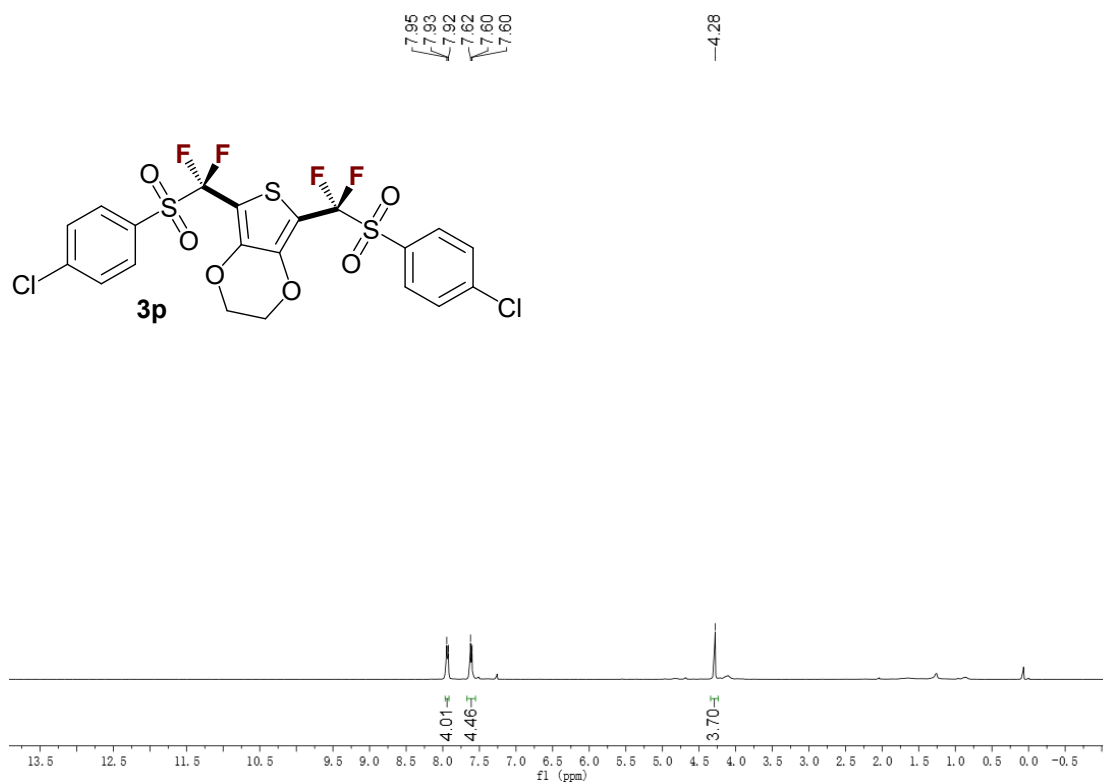

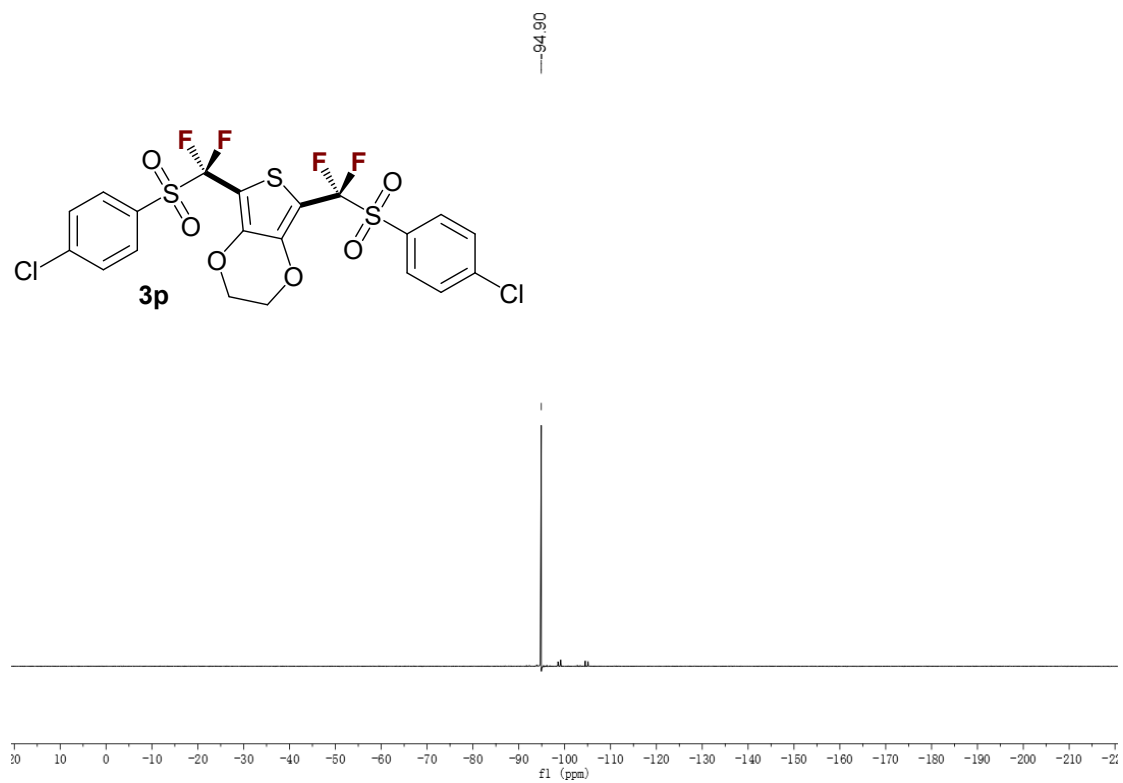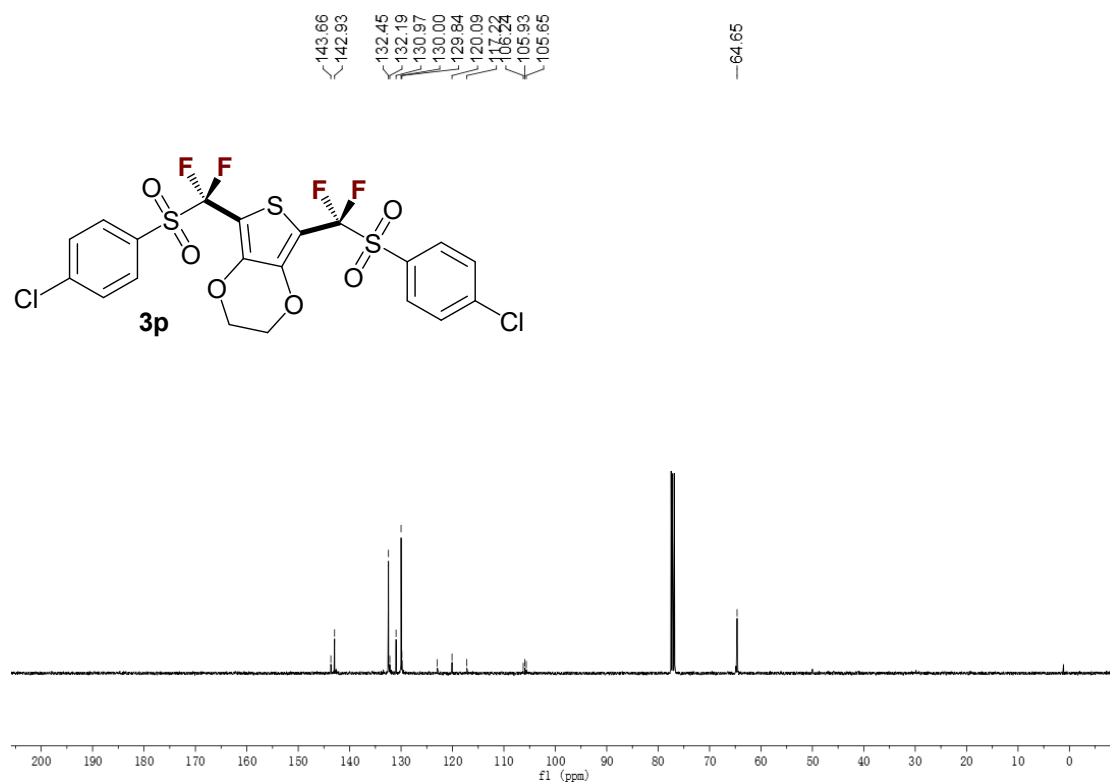

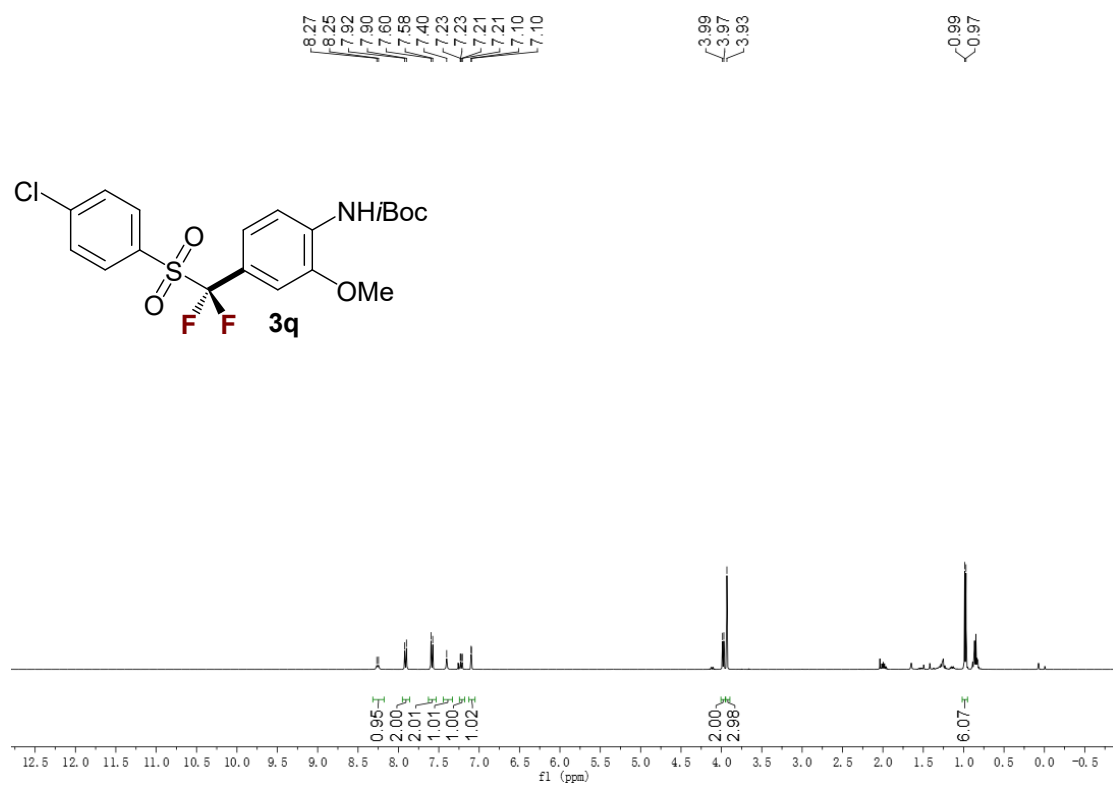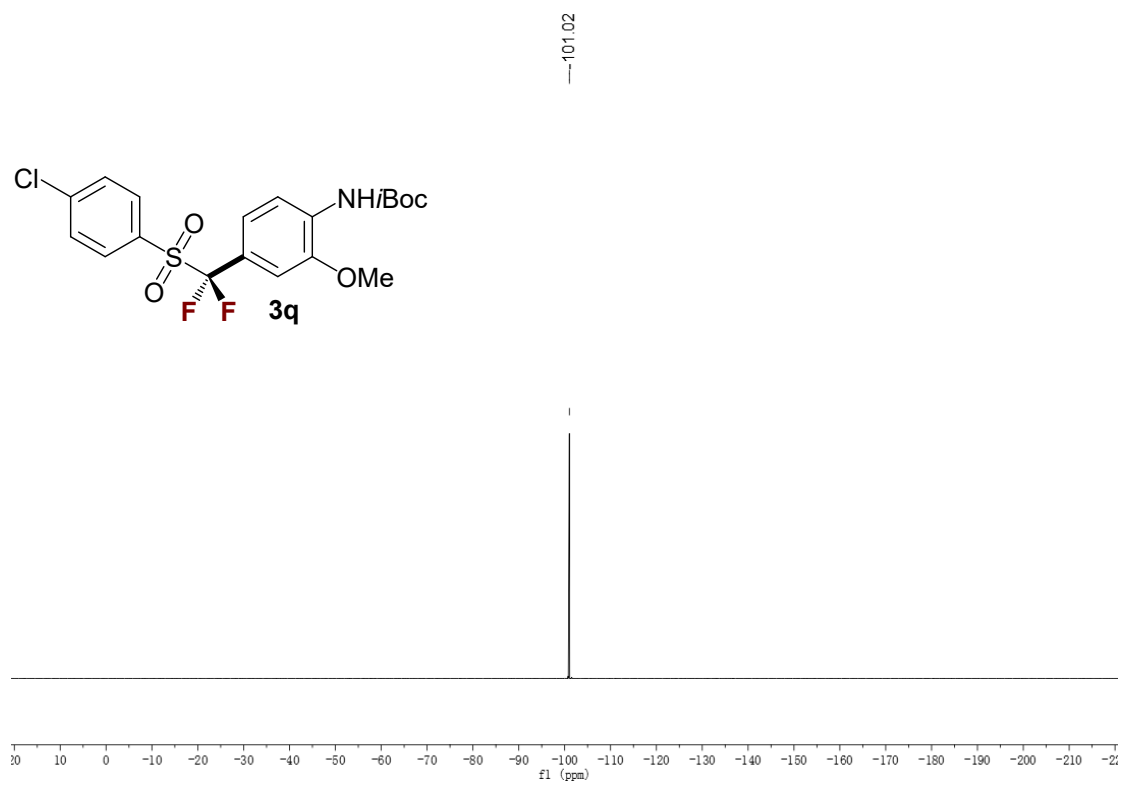

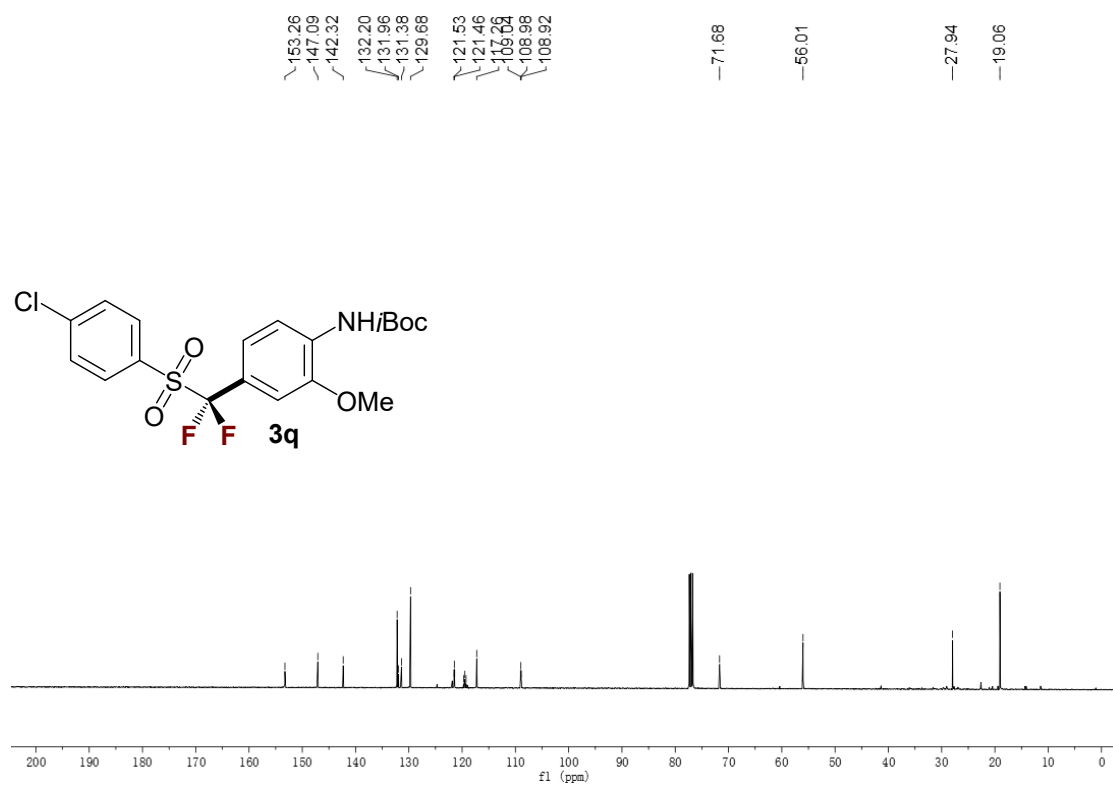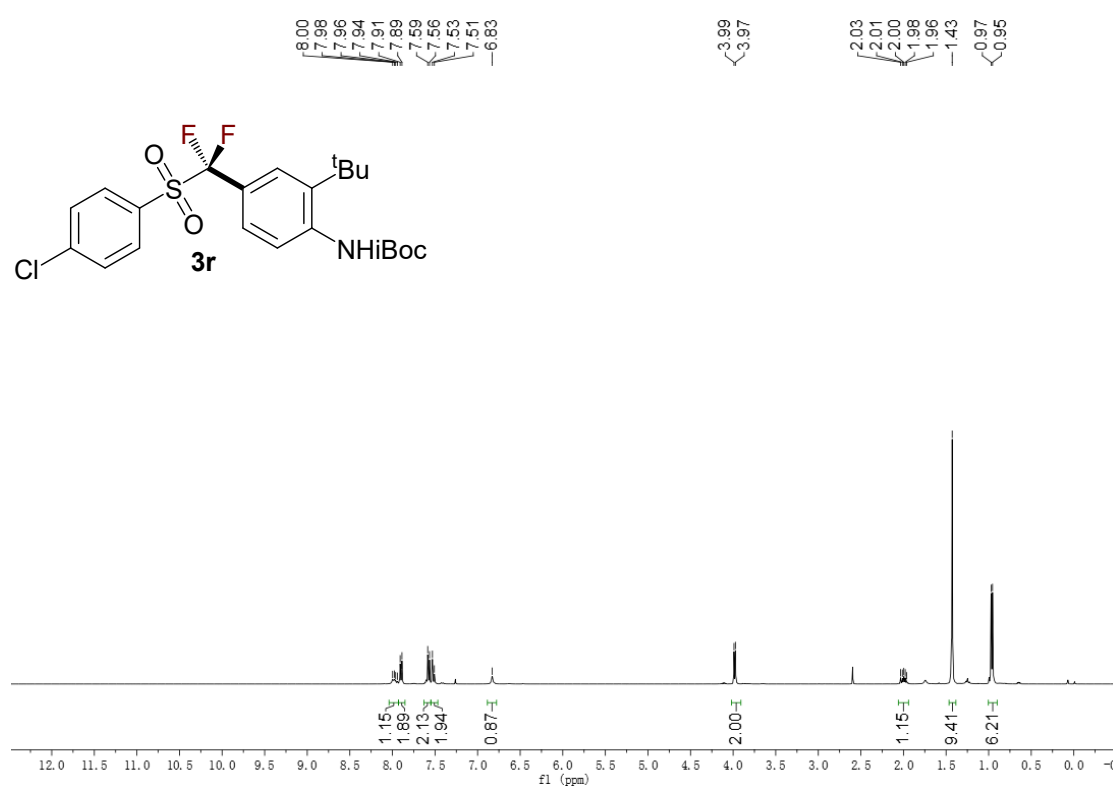

-101.42

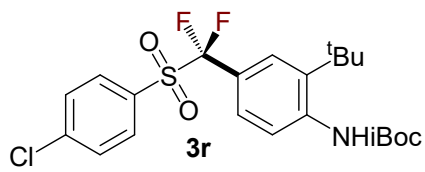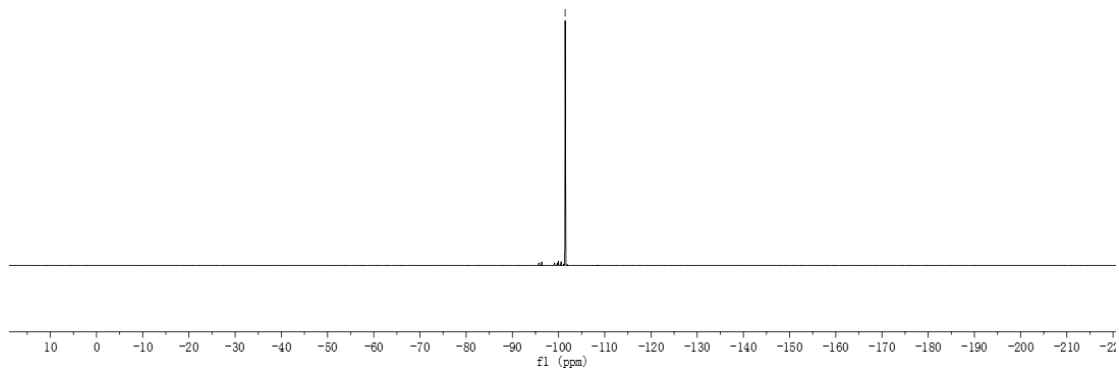

153.68  
142.42  
140.08  
132.35  
131.56  
129.76  
126.86  
126.80  
126.74  
126.26  
126.20  
126.14  
124.91  
122.07  
121.76  
121.56  
121.33  
119.22  
71.87  
34.59  
30.51  
28.08  
19.13

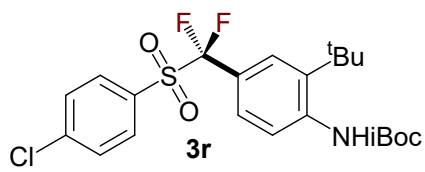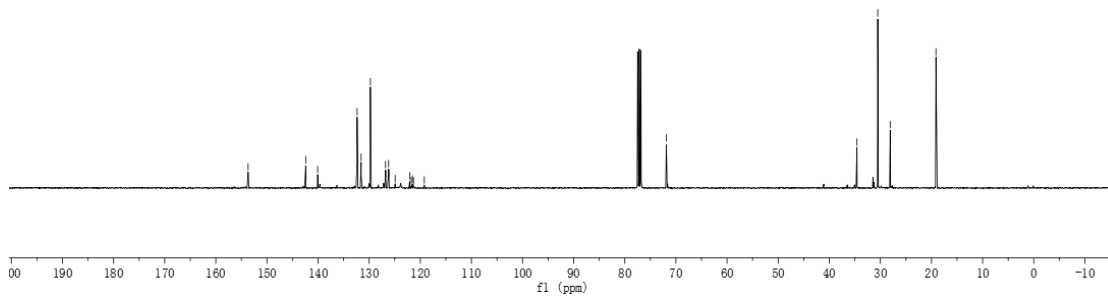

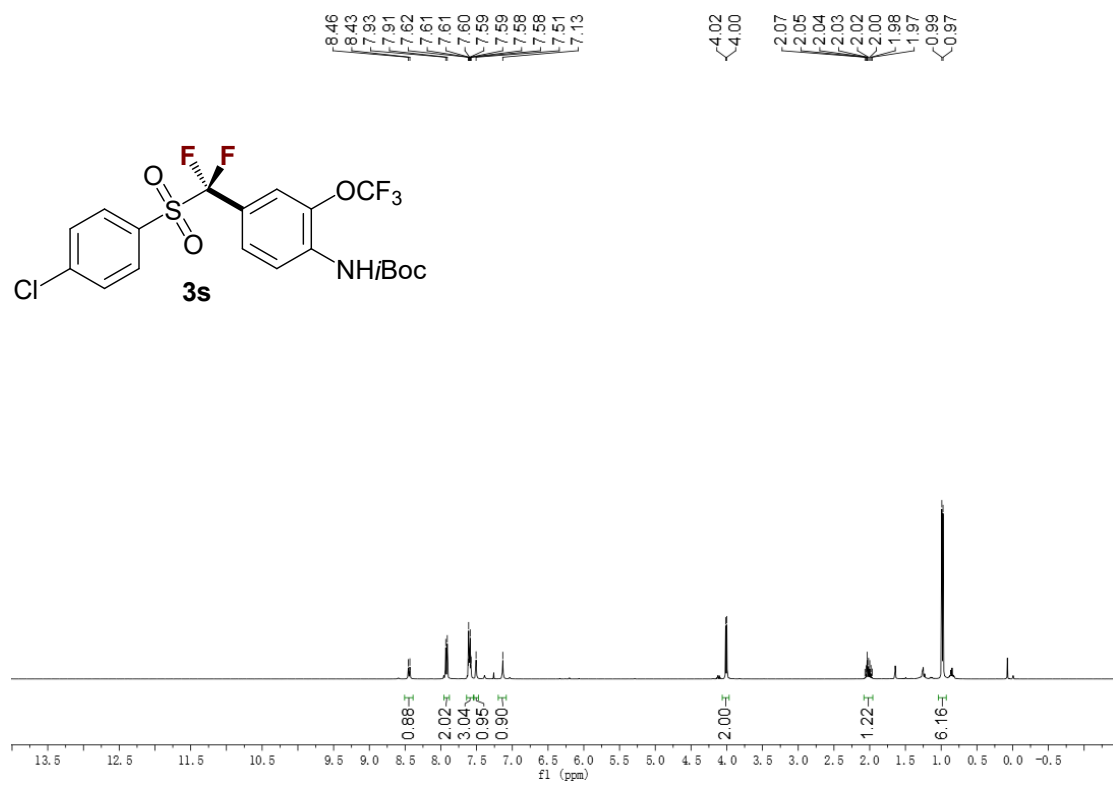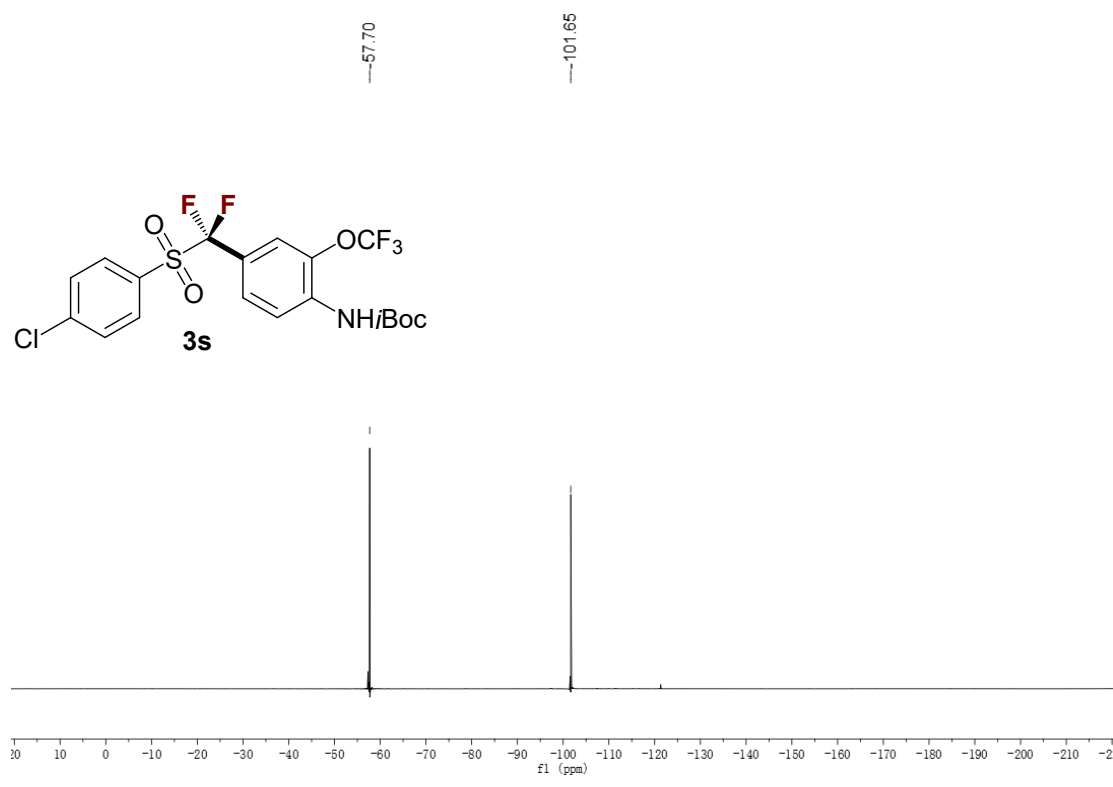

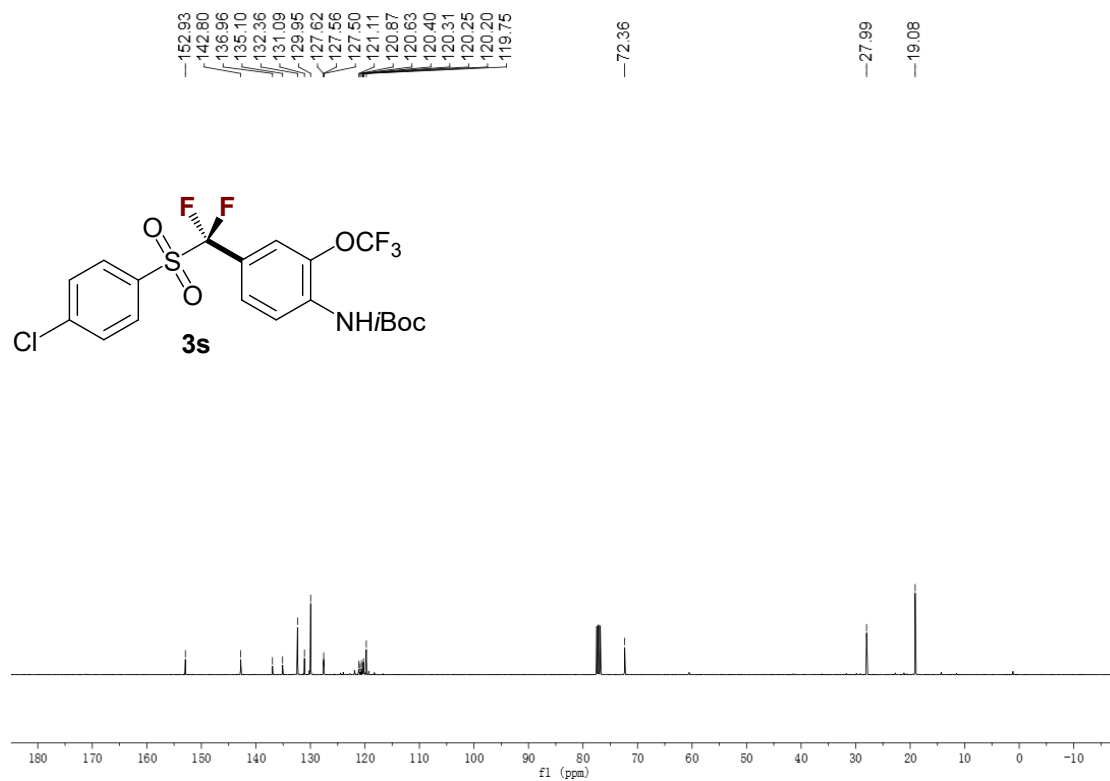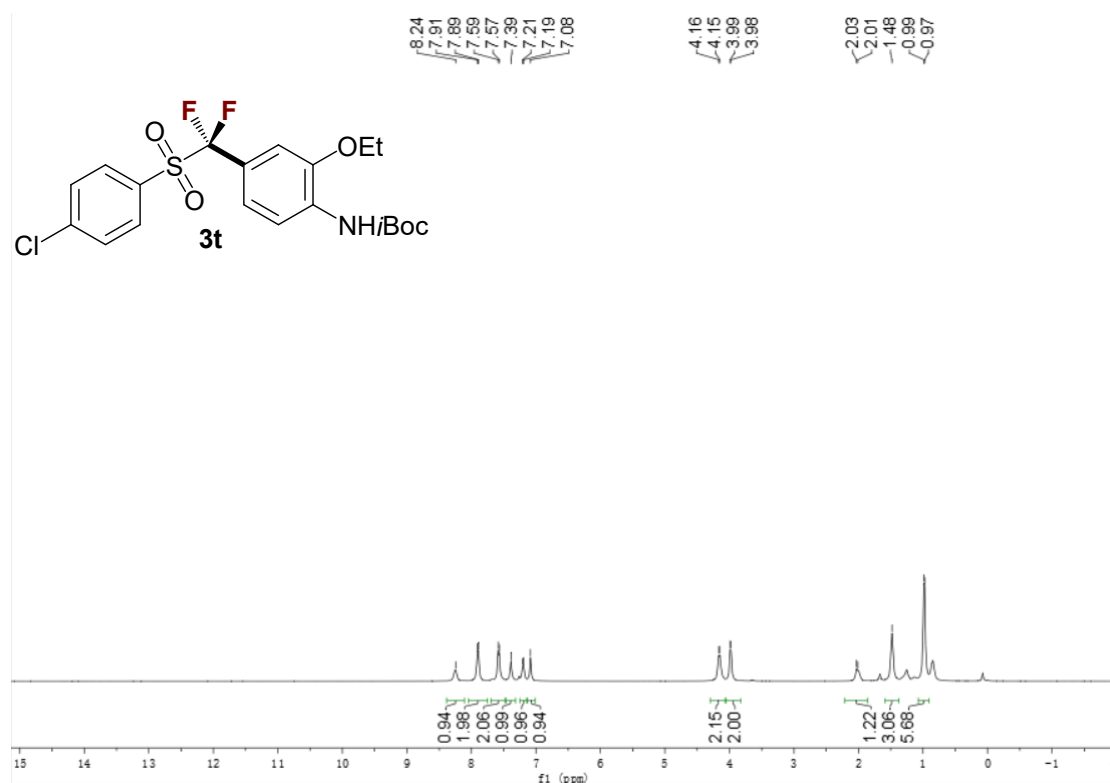



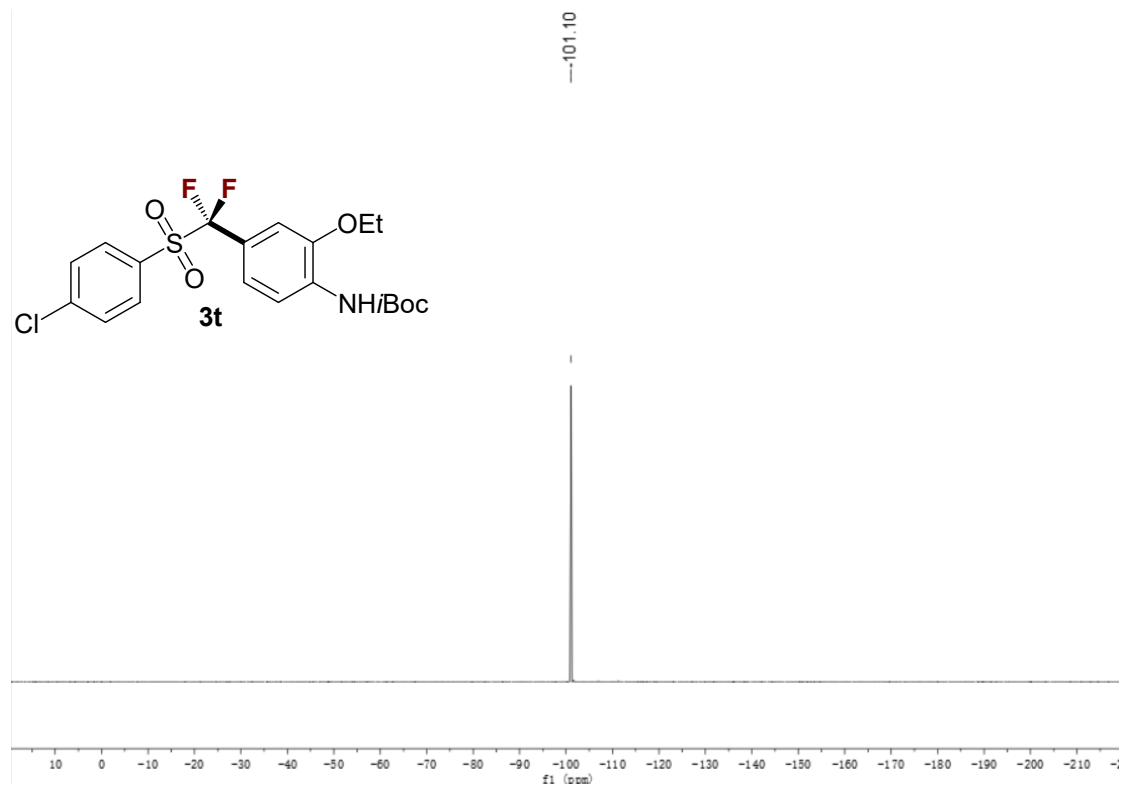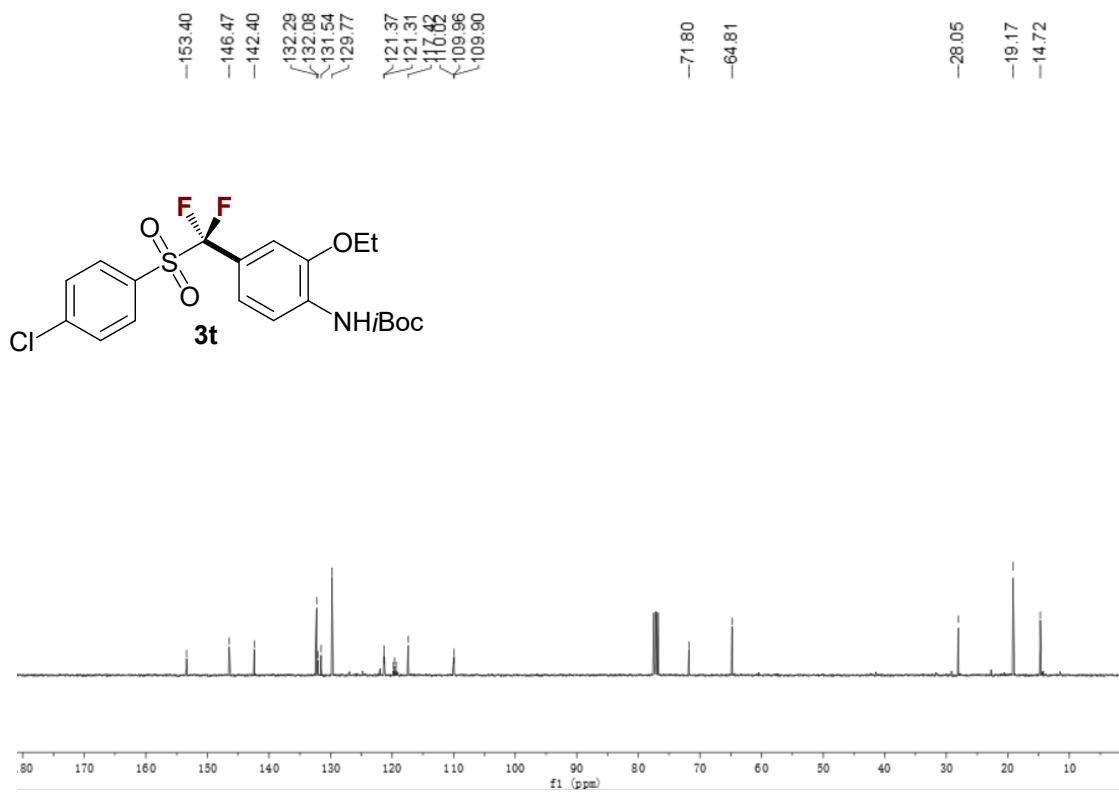

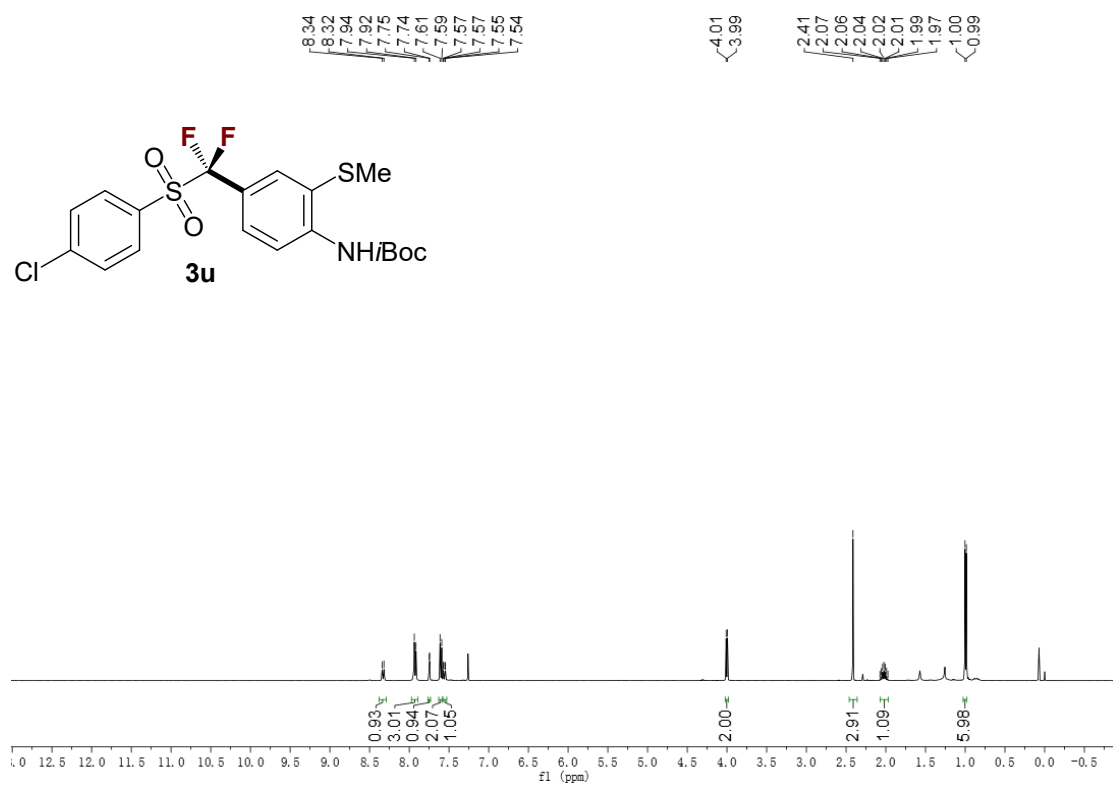

→ -101.47

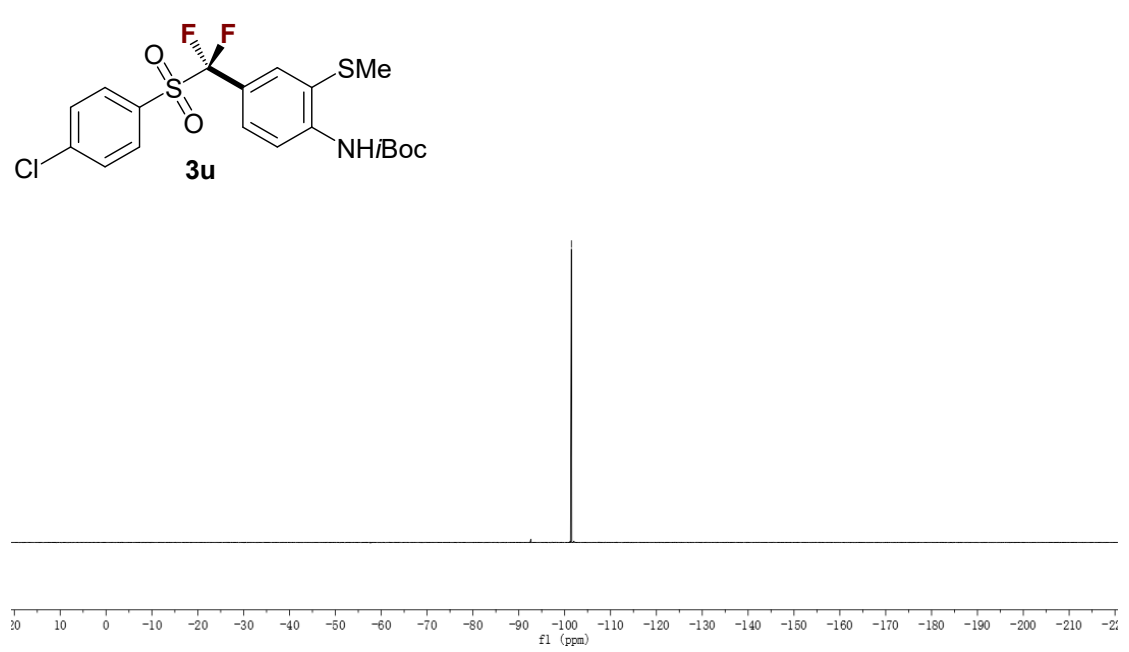

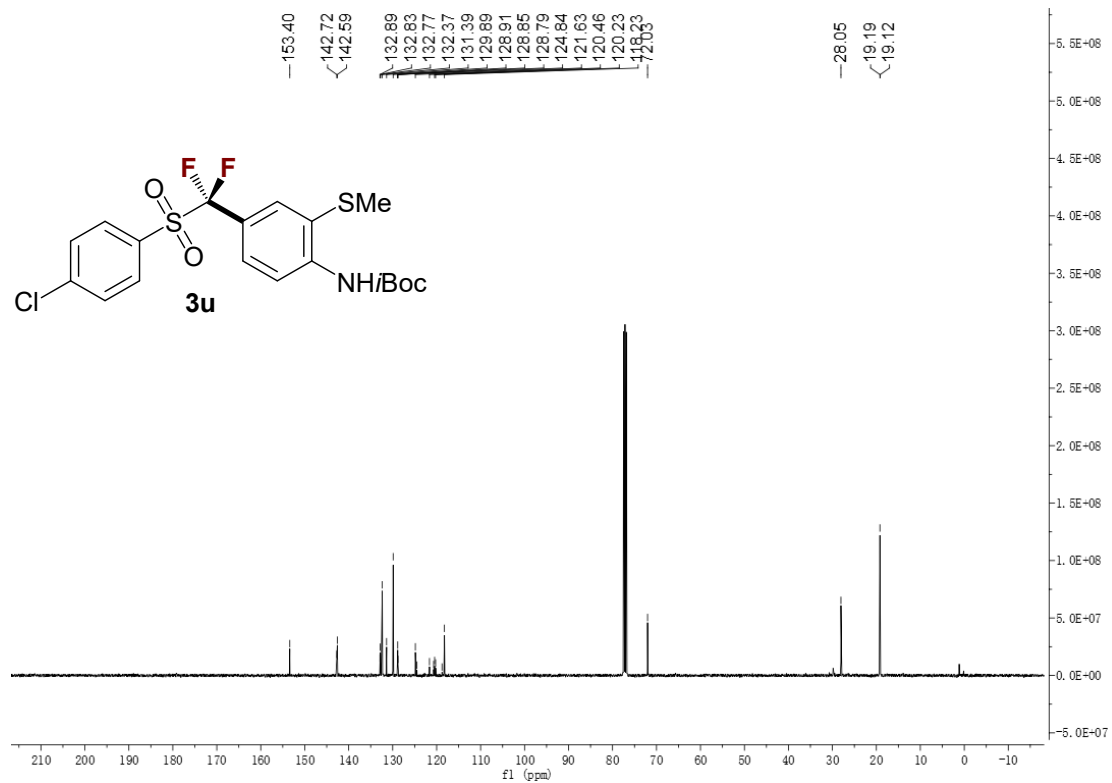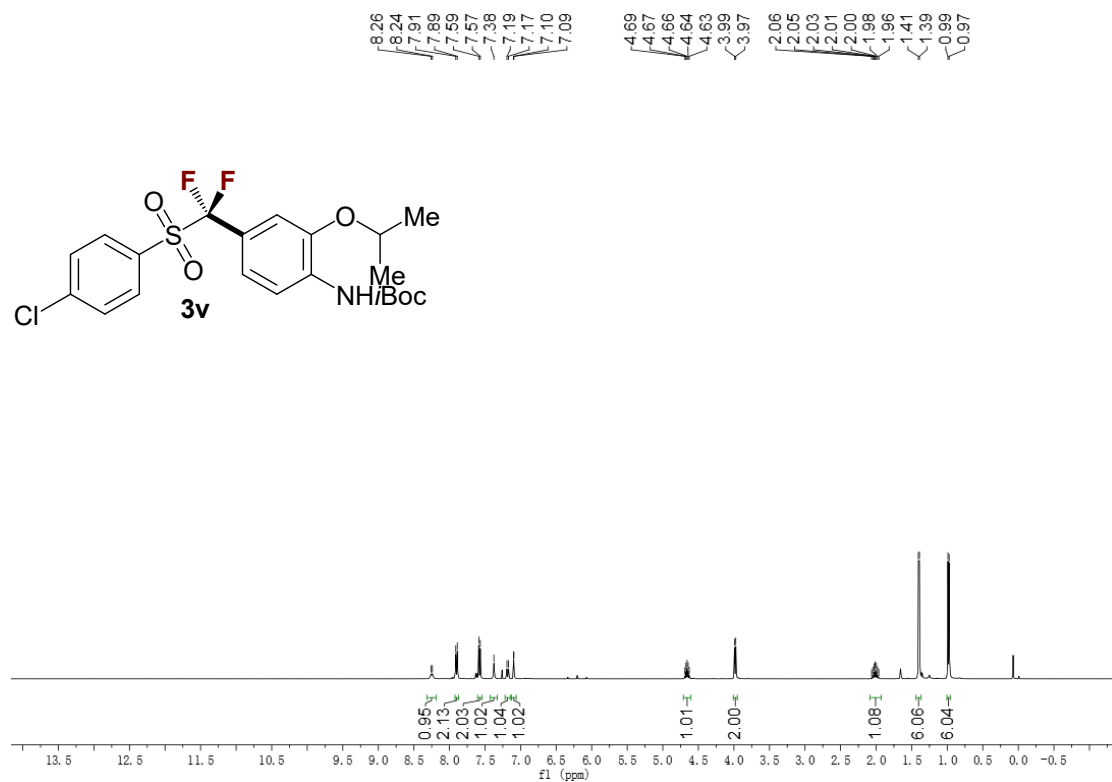

--101.24

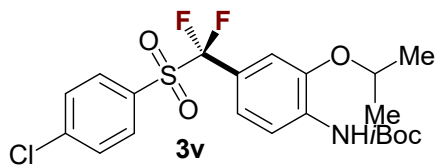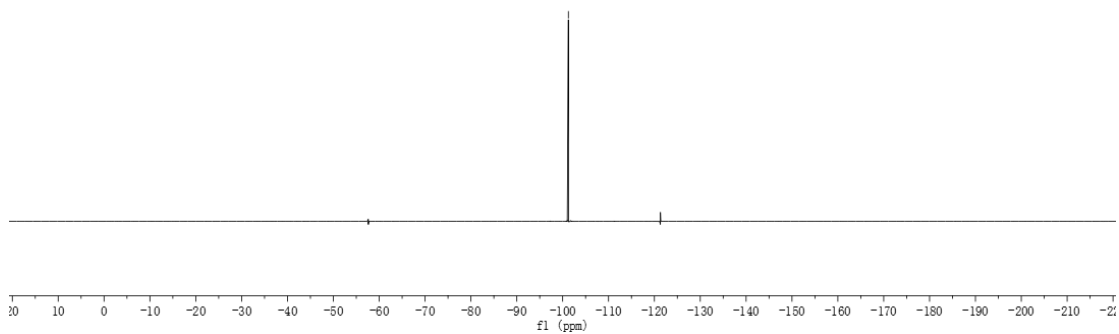

153.42  
145.34  
142.42  
132.30  
131.54  
129.80  
124.83  
121.88  
121.20  
121.13  
121.07  
119.72  
119.50  
119.27  
119.13  
117.62  
111.55  
111.49  
111.43  
71.89  
71.81

28.06  
22.04  
19.19

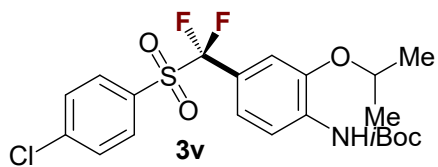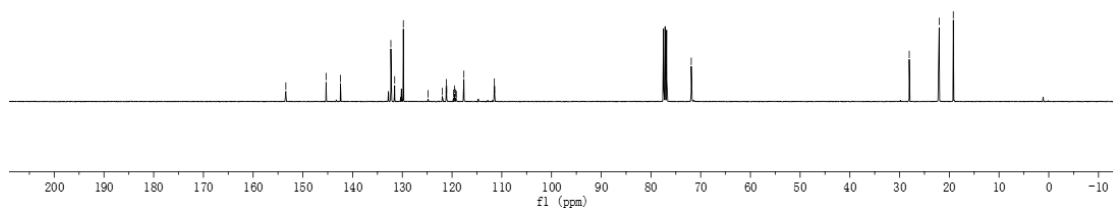

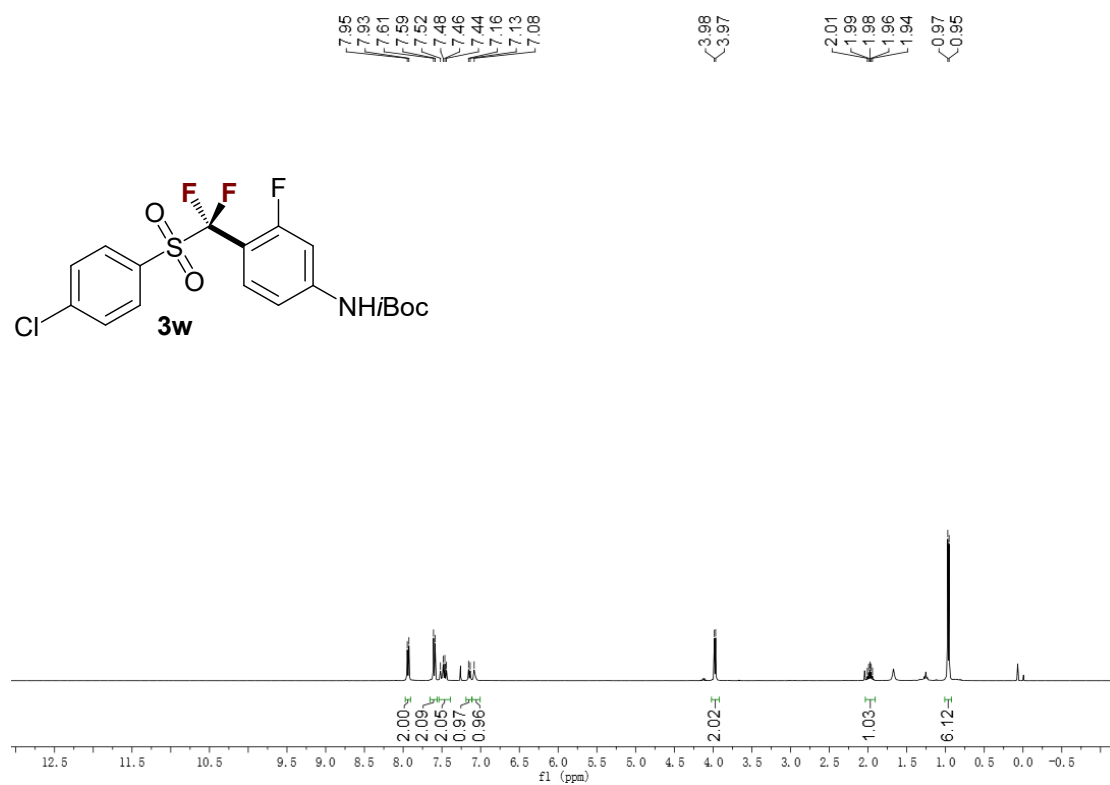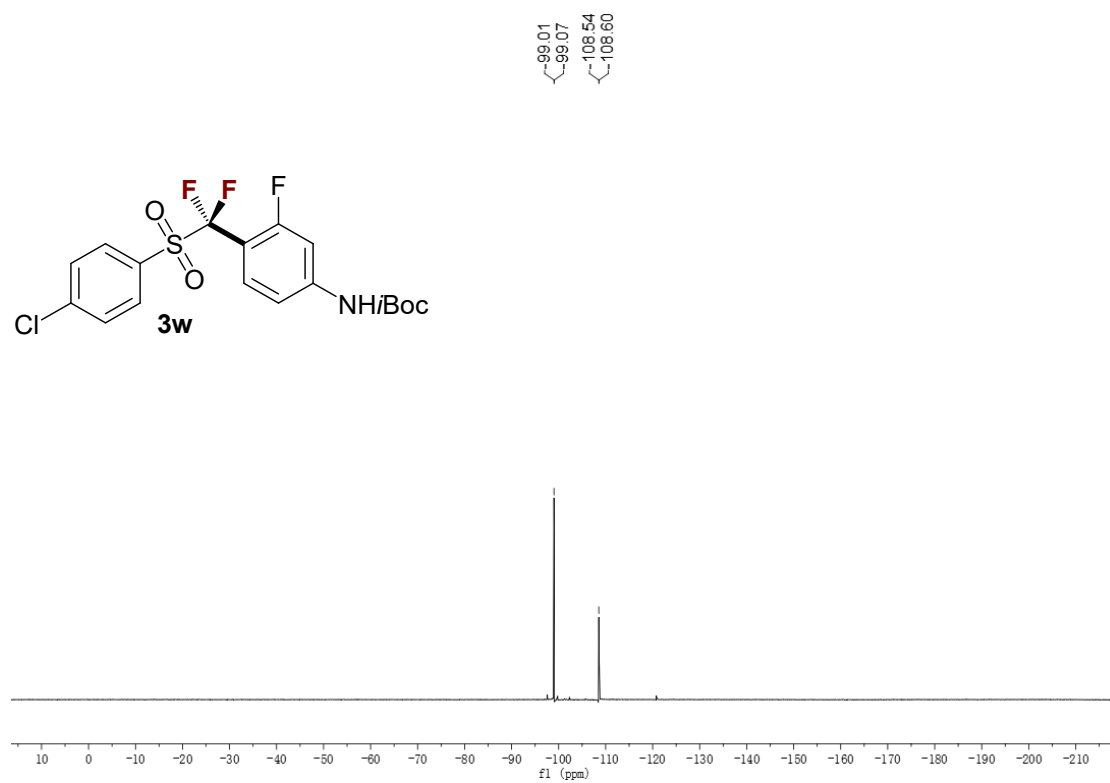

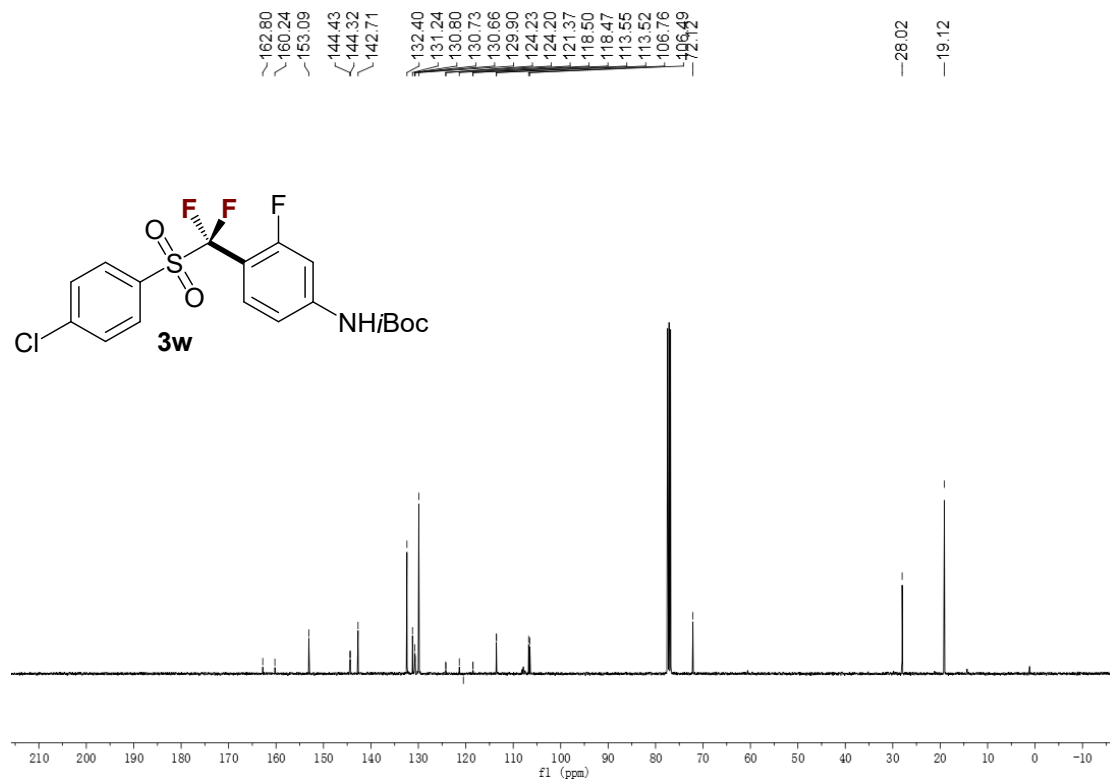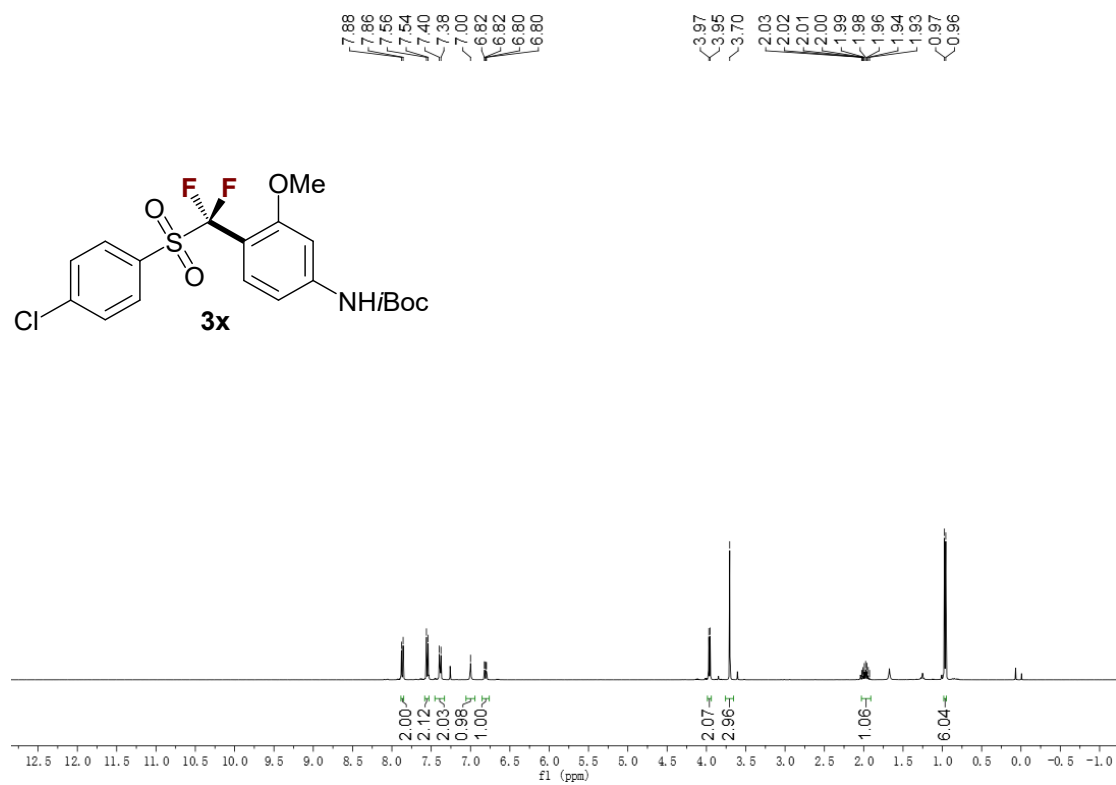

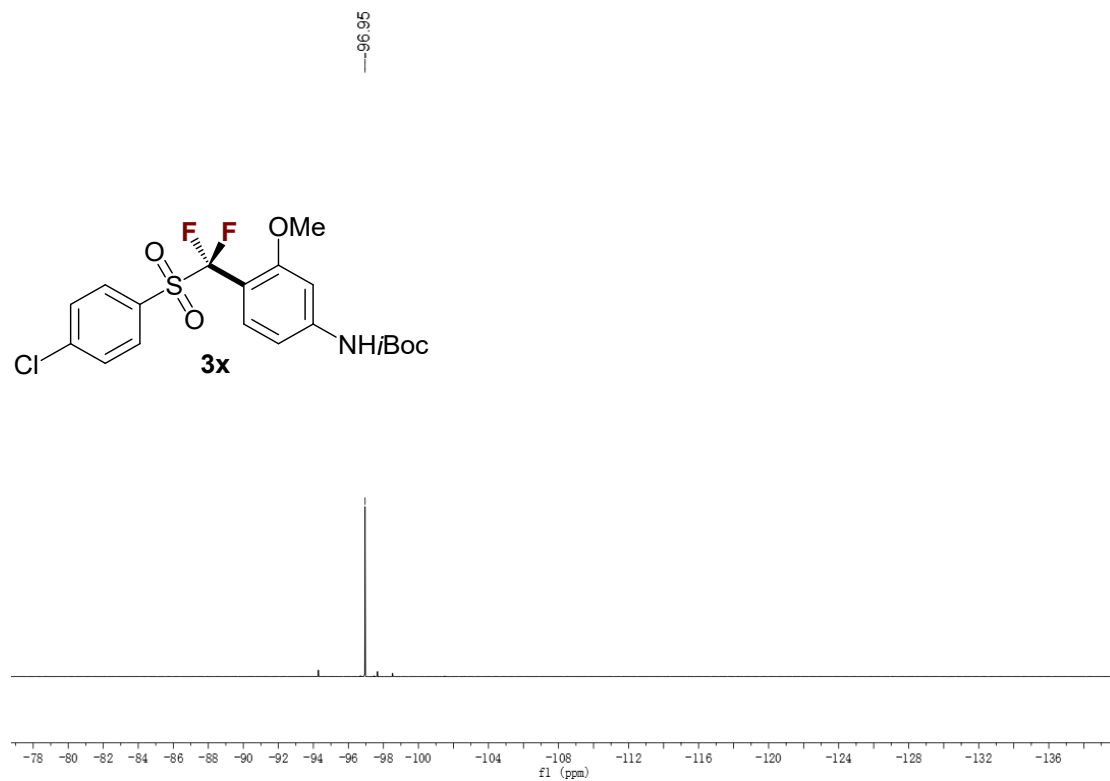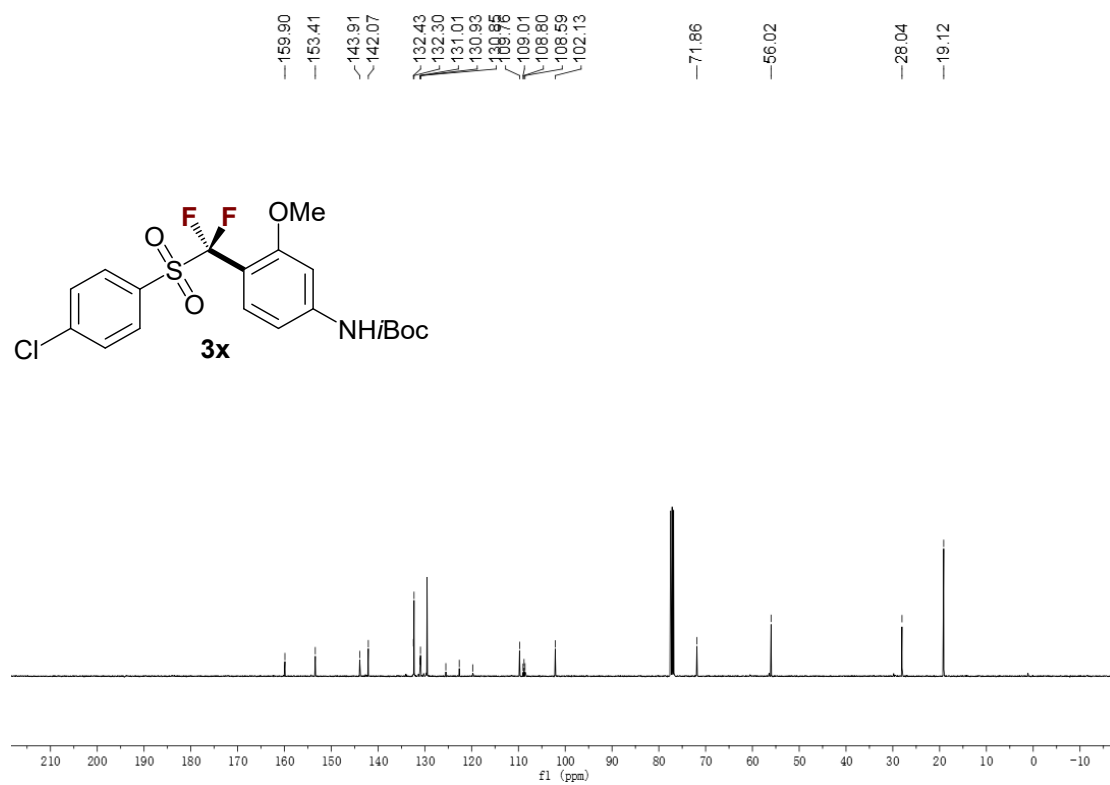

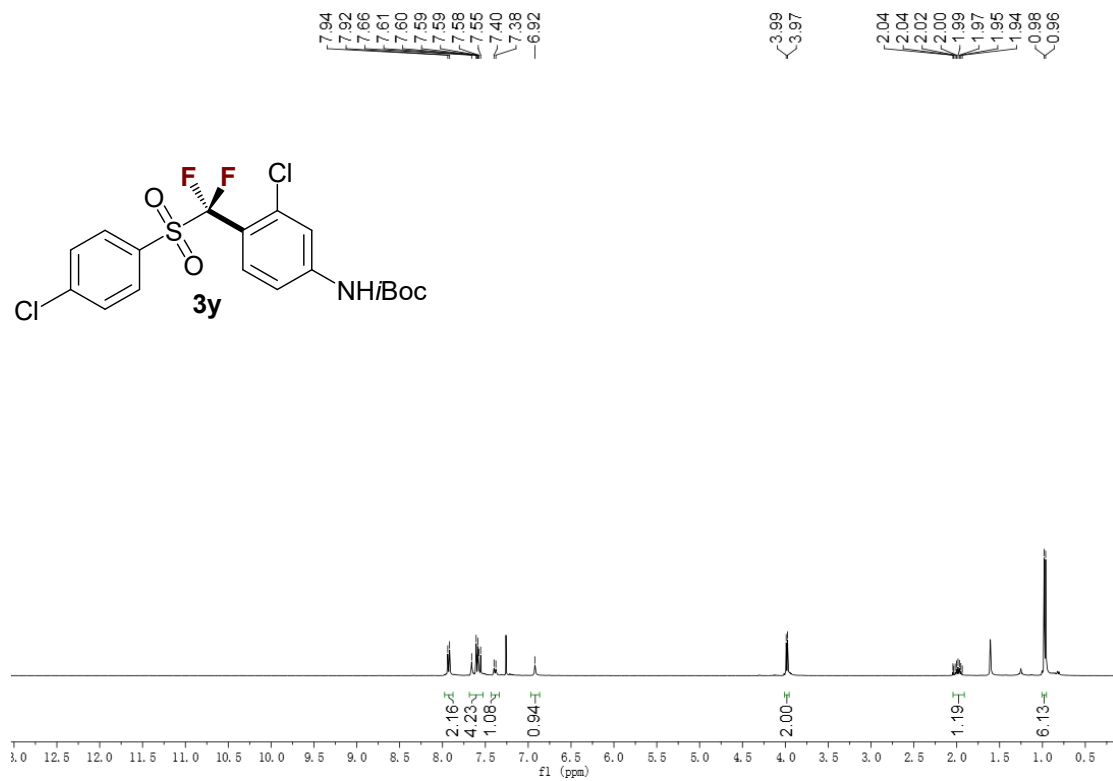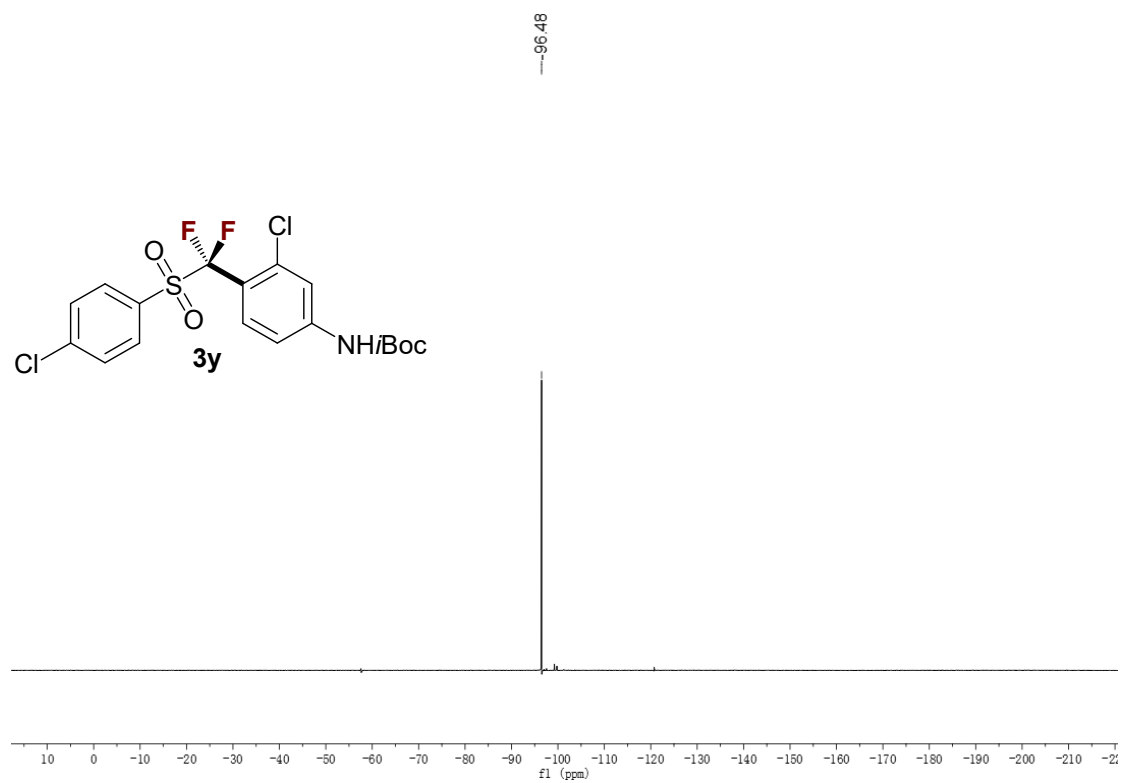



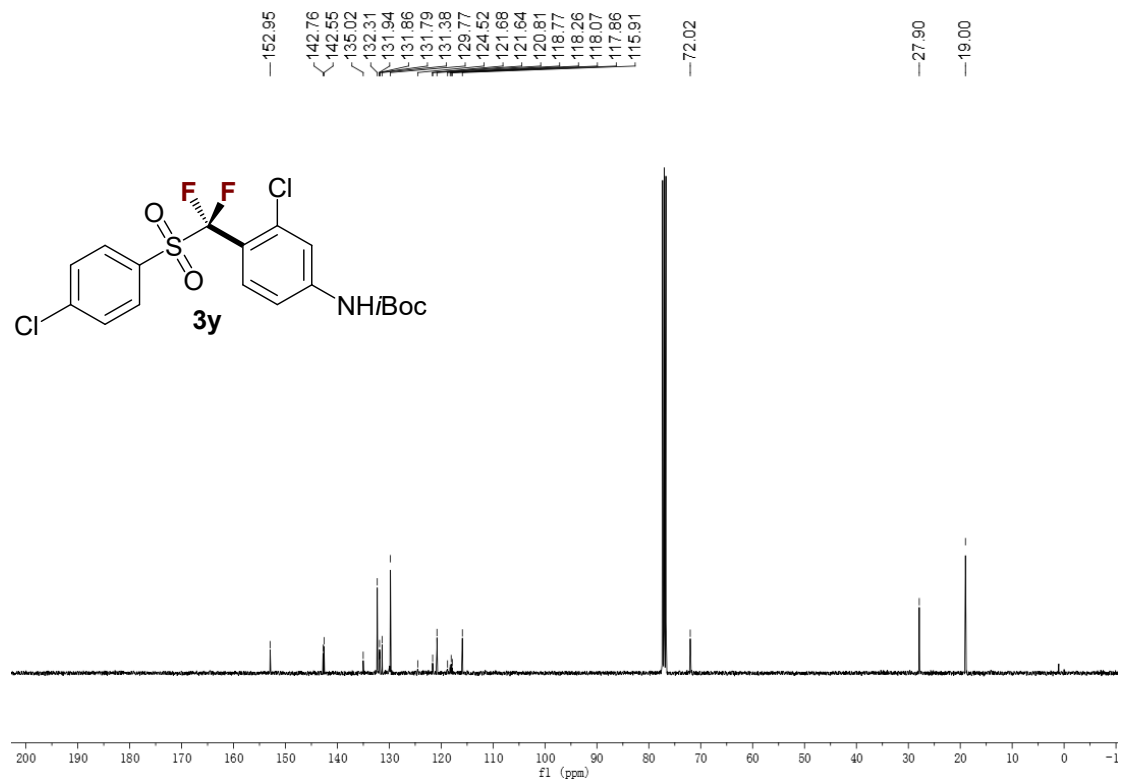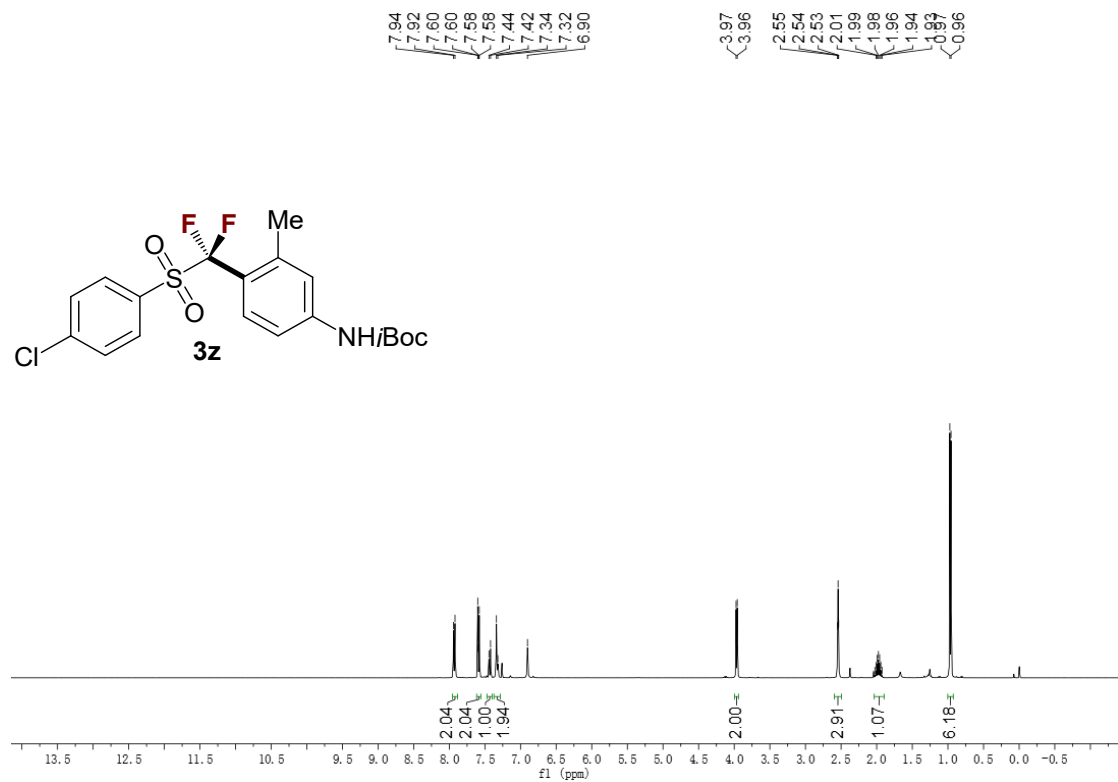

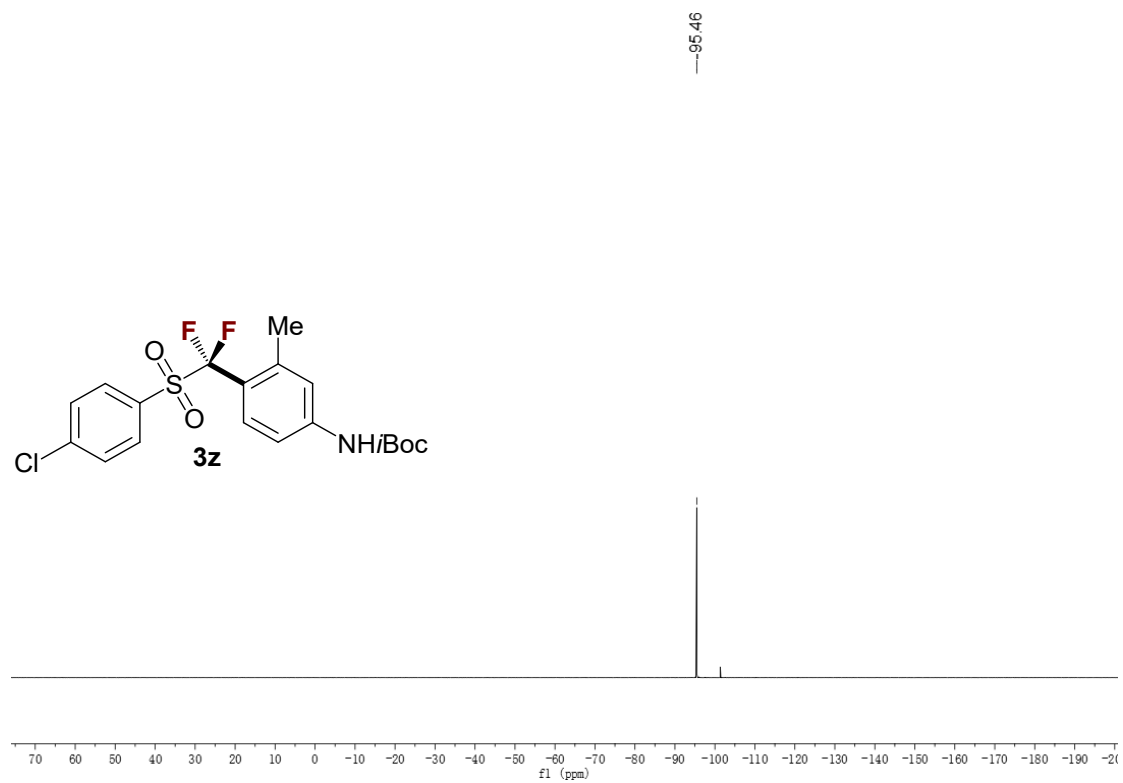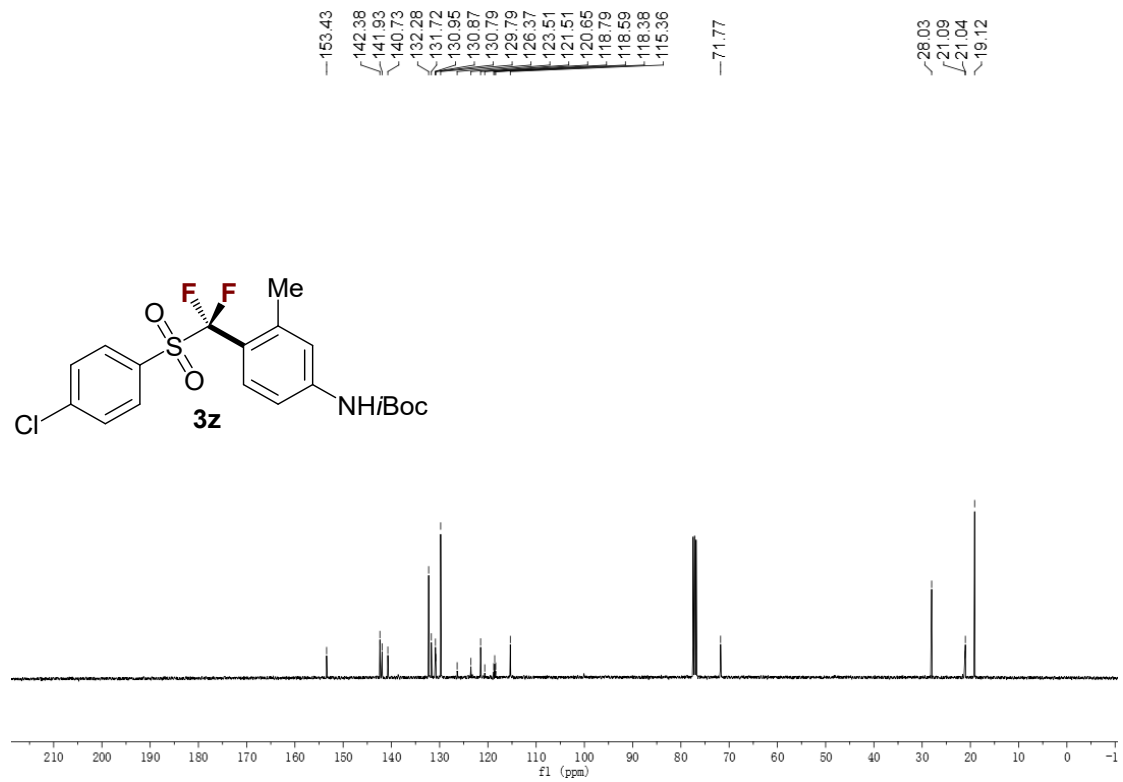

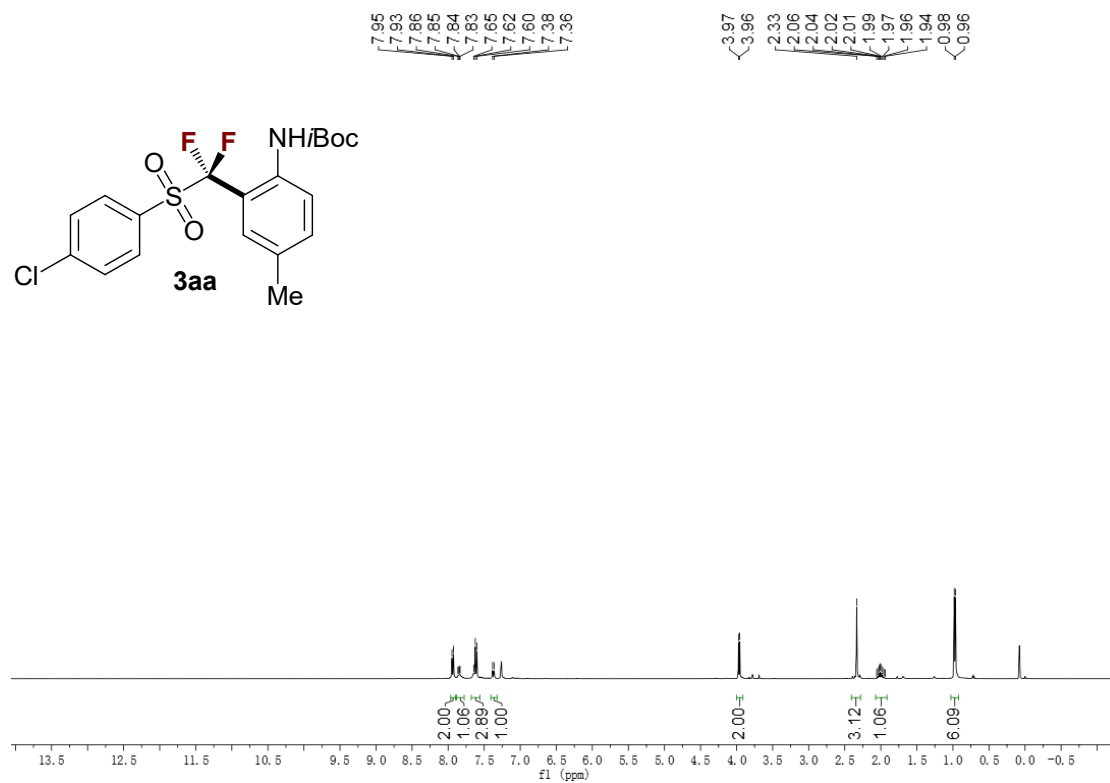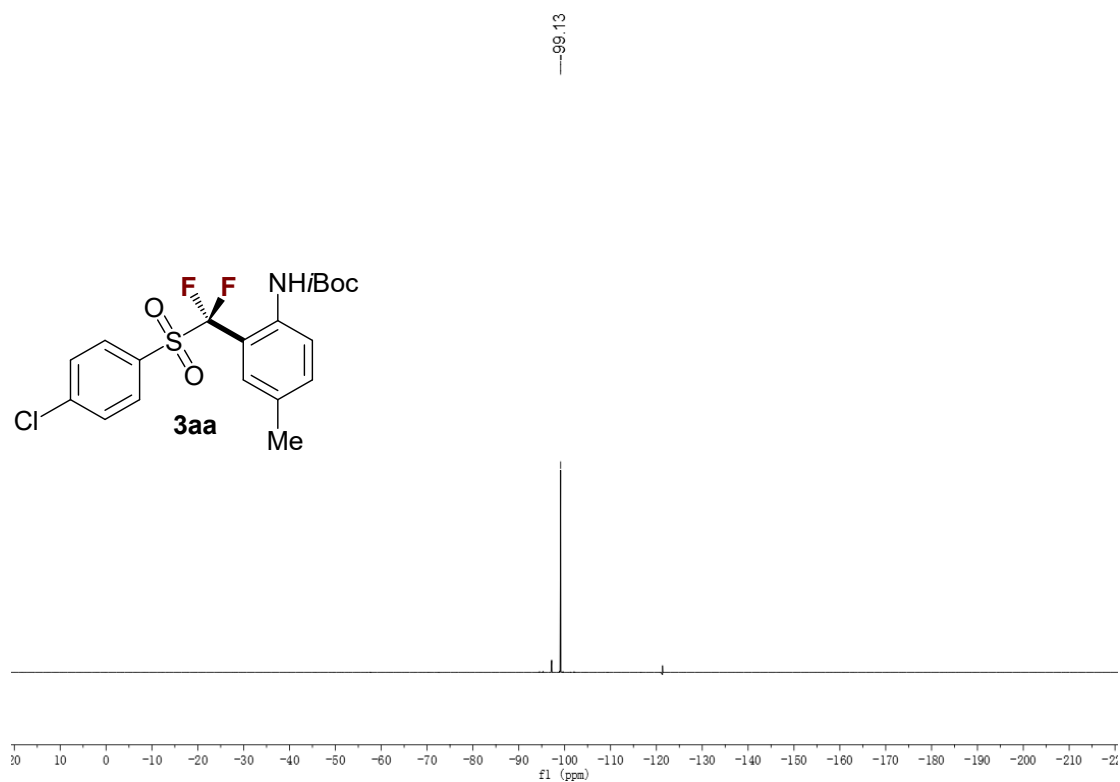

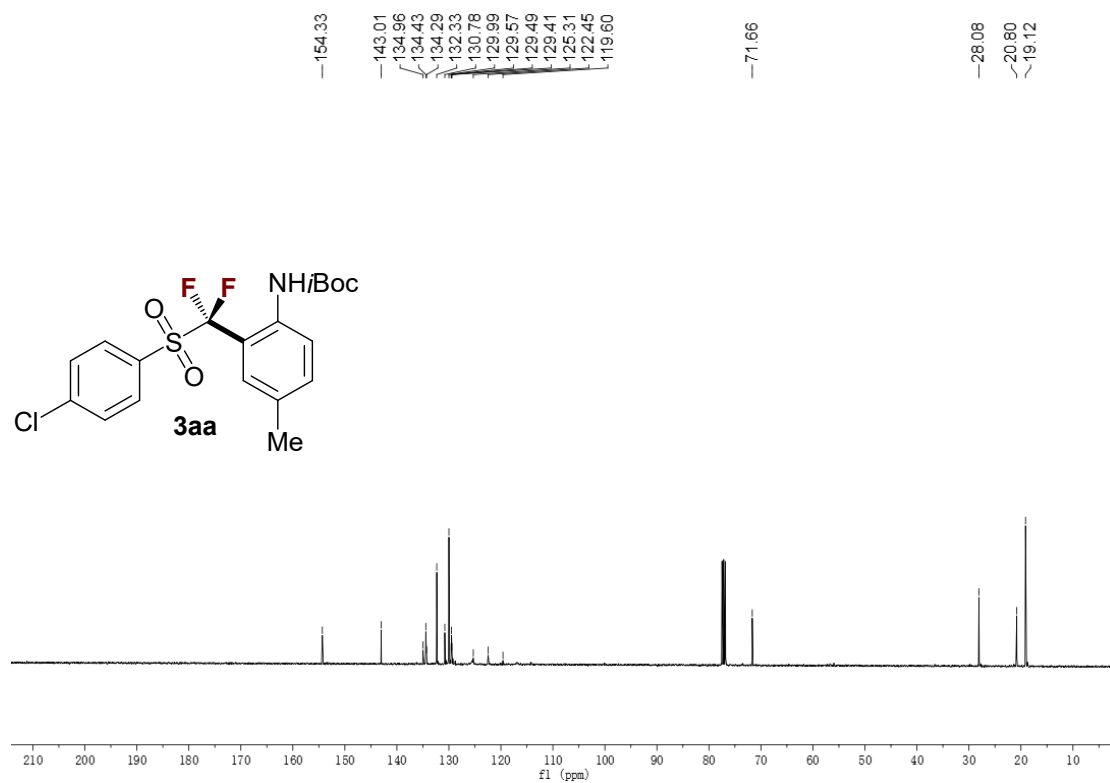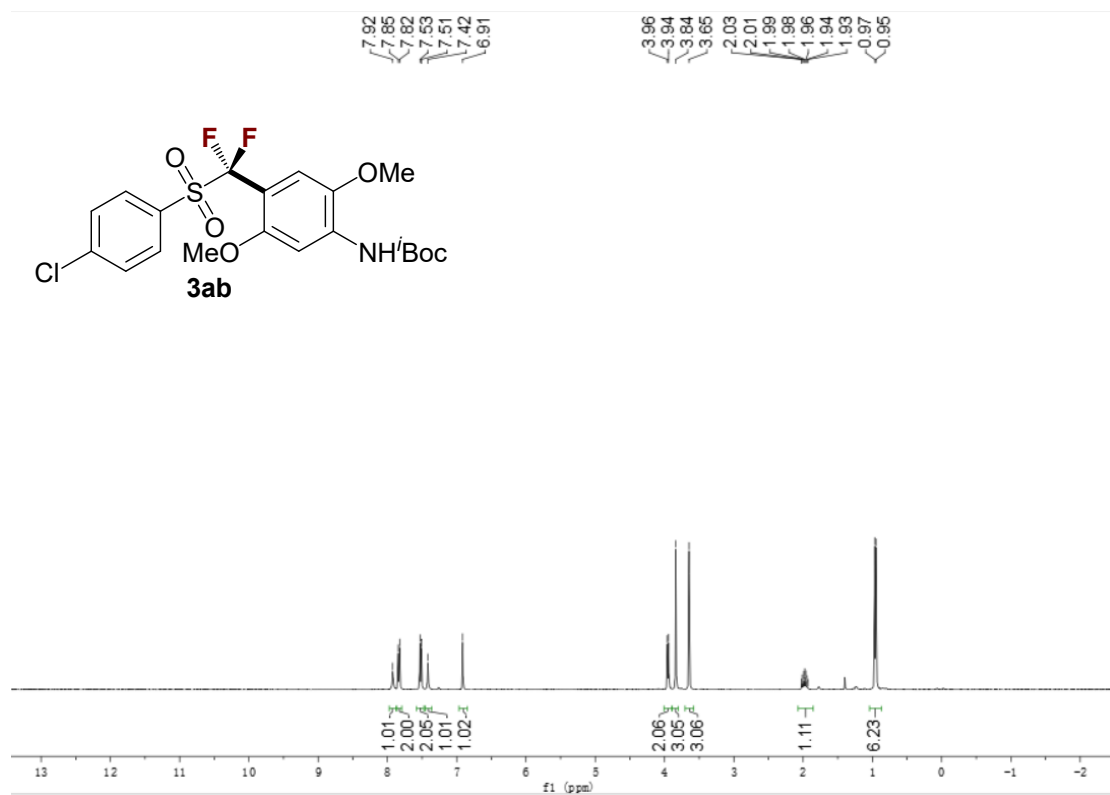

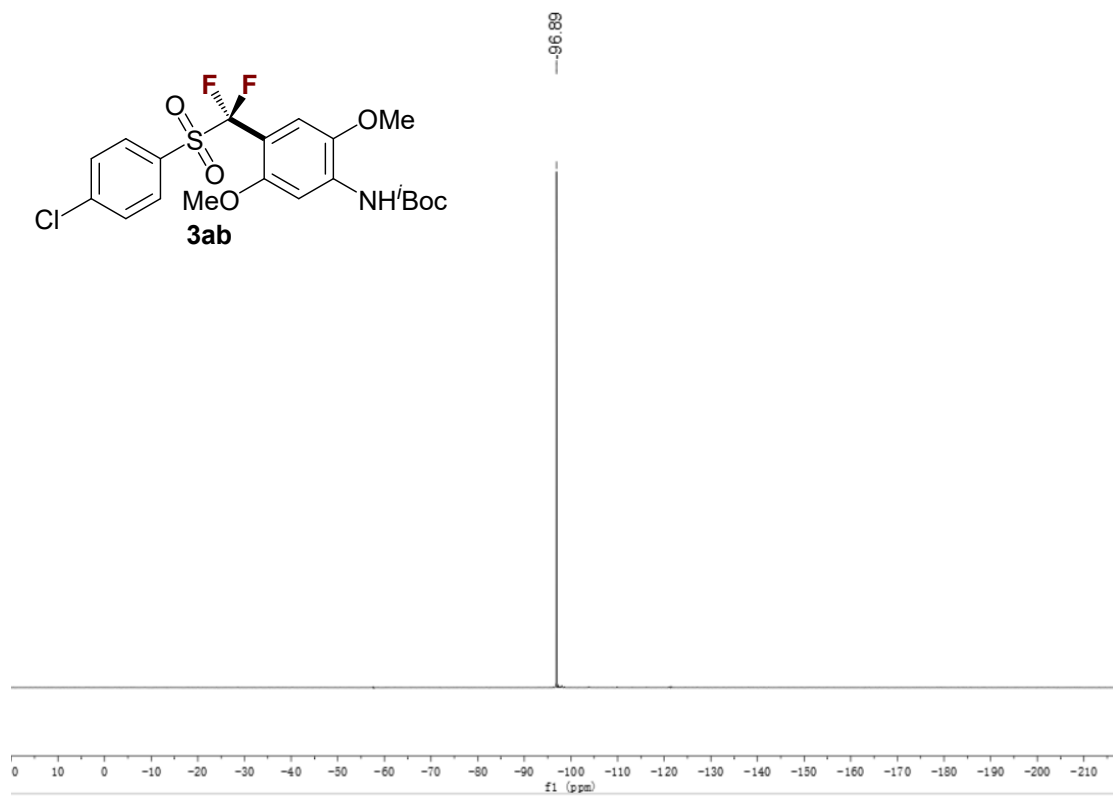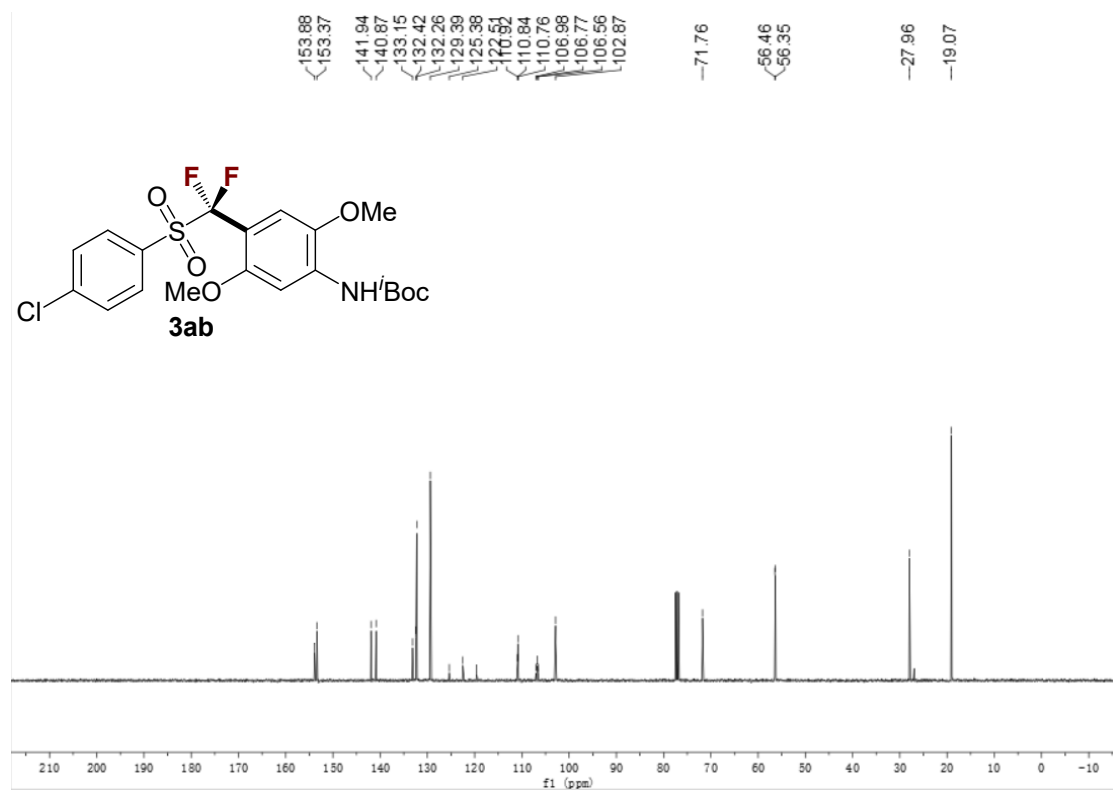

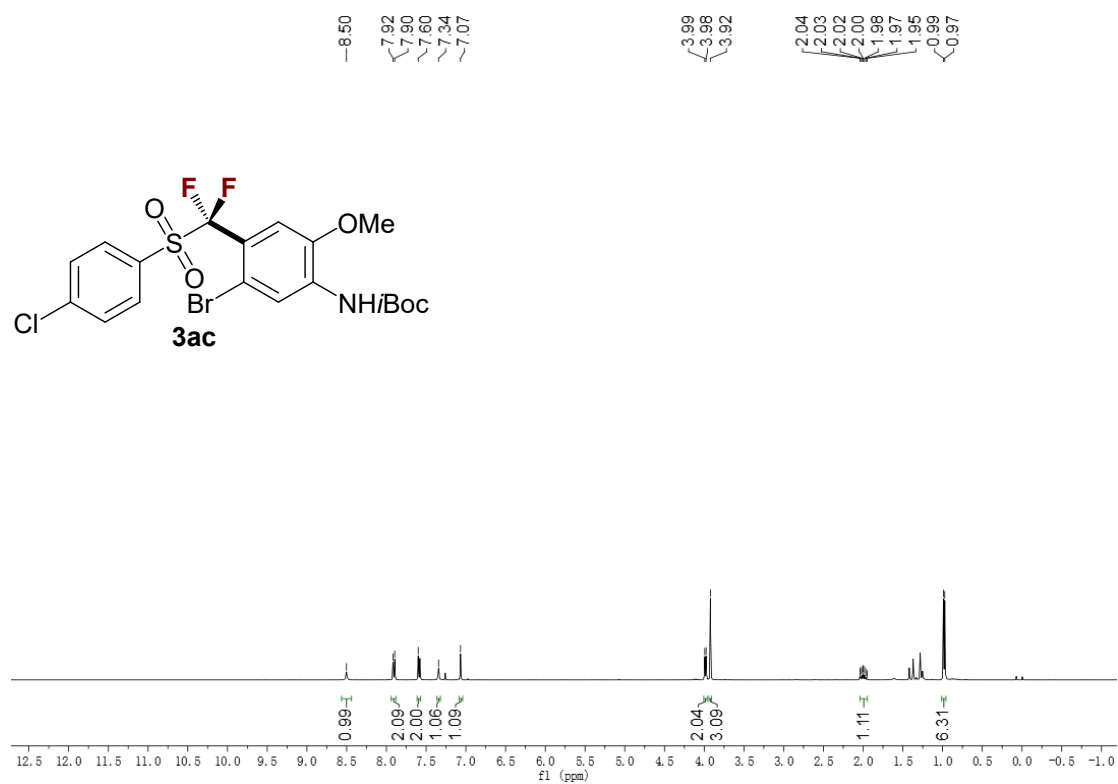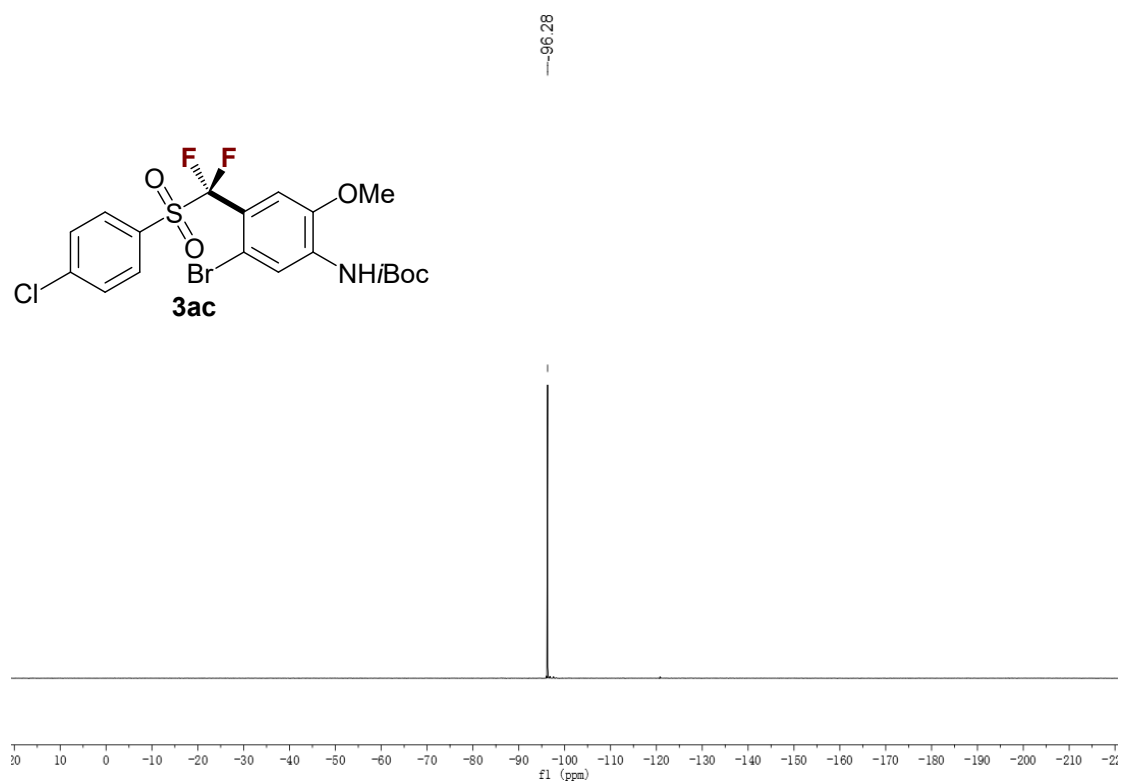

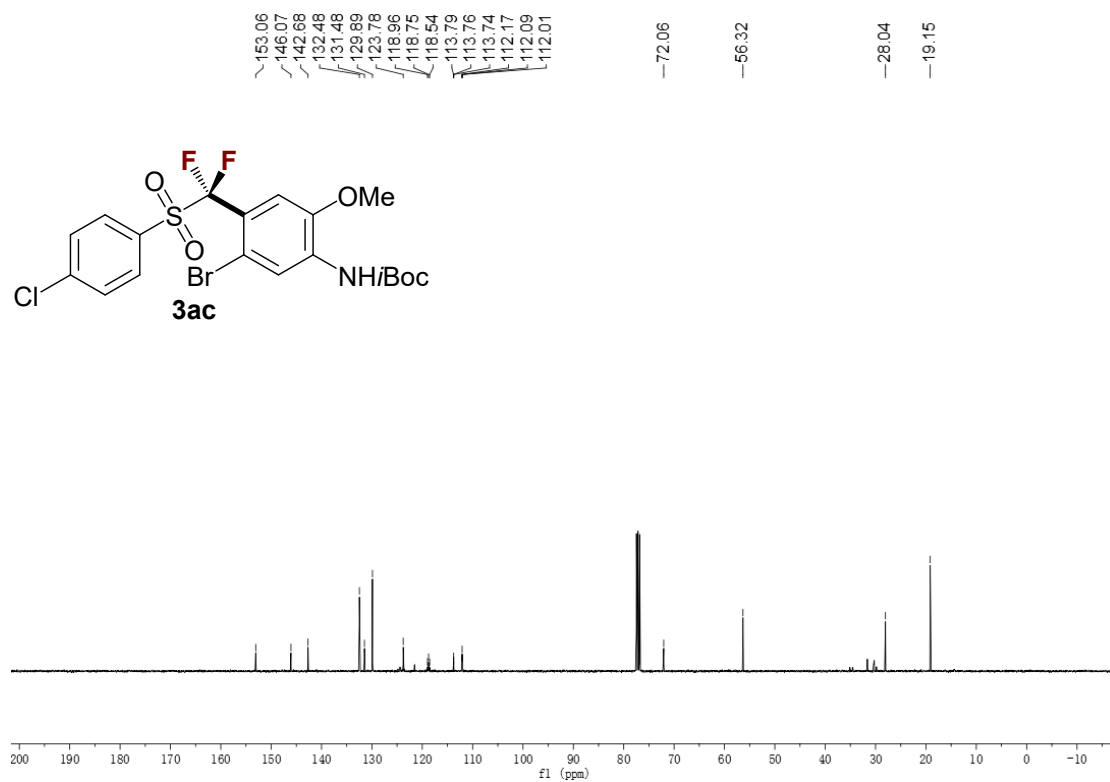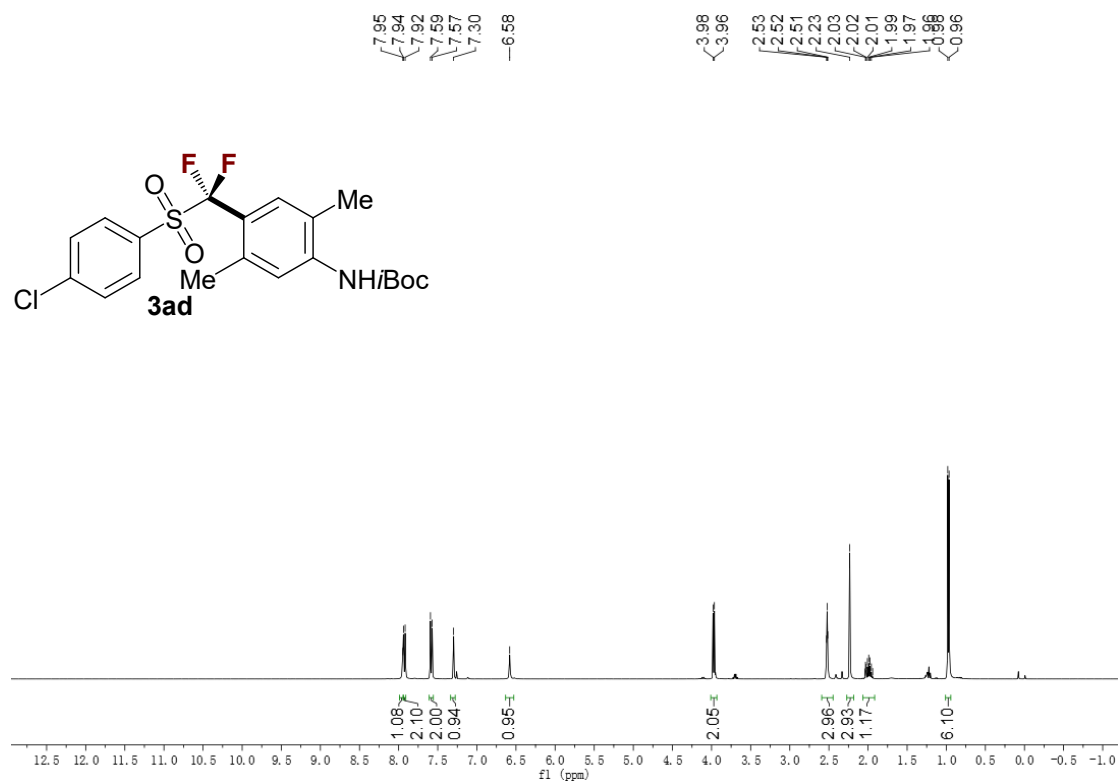

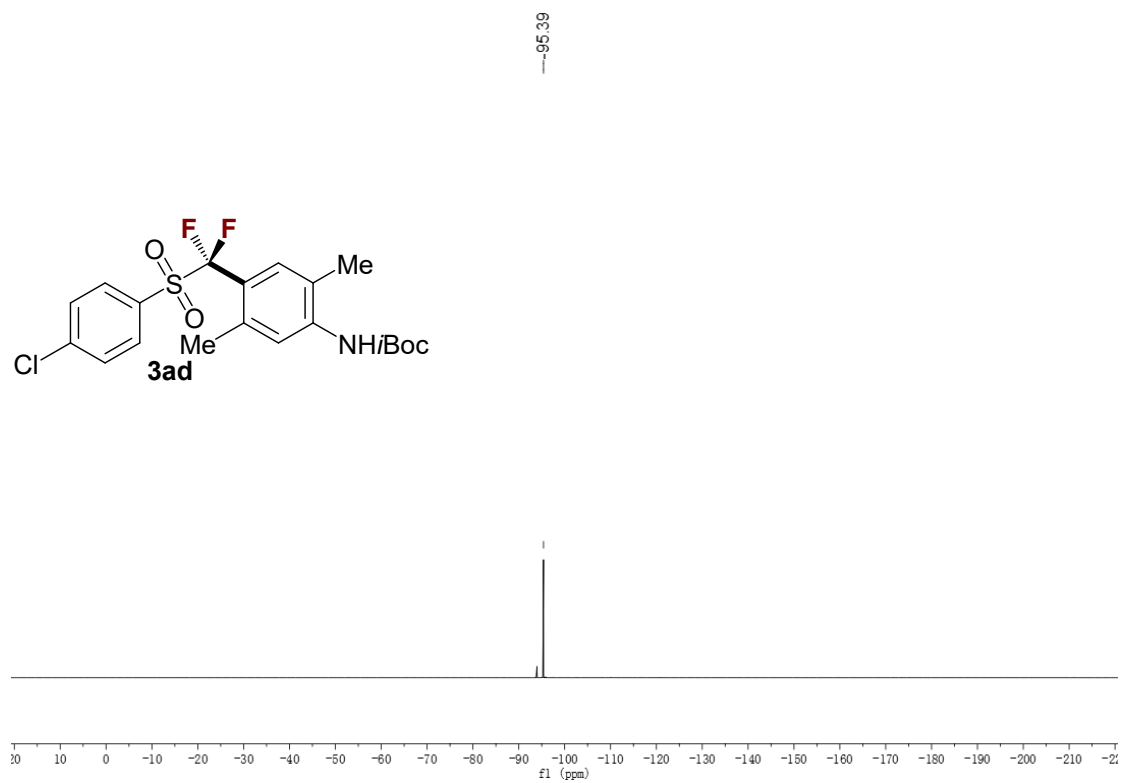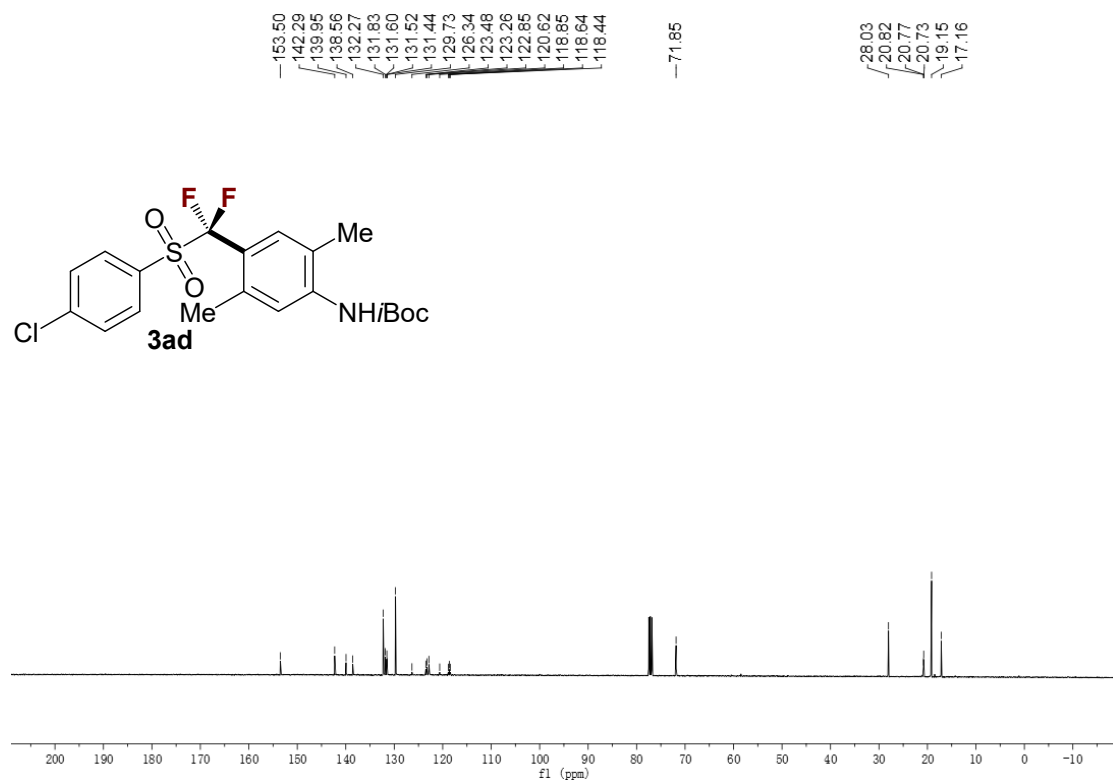



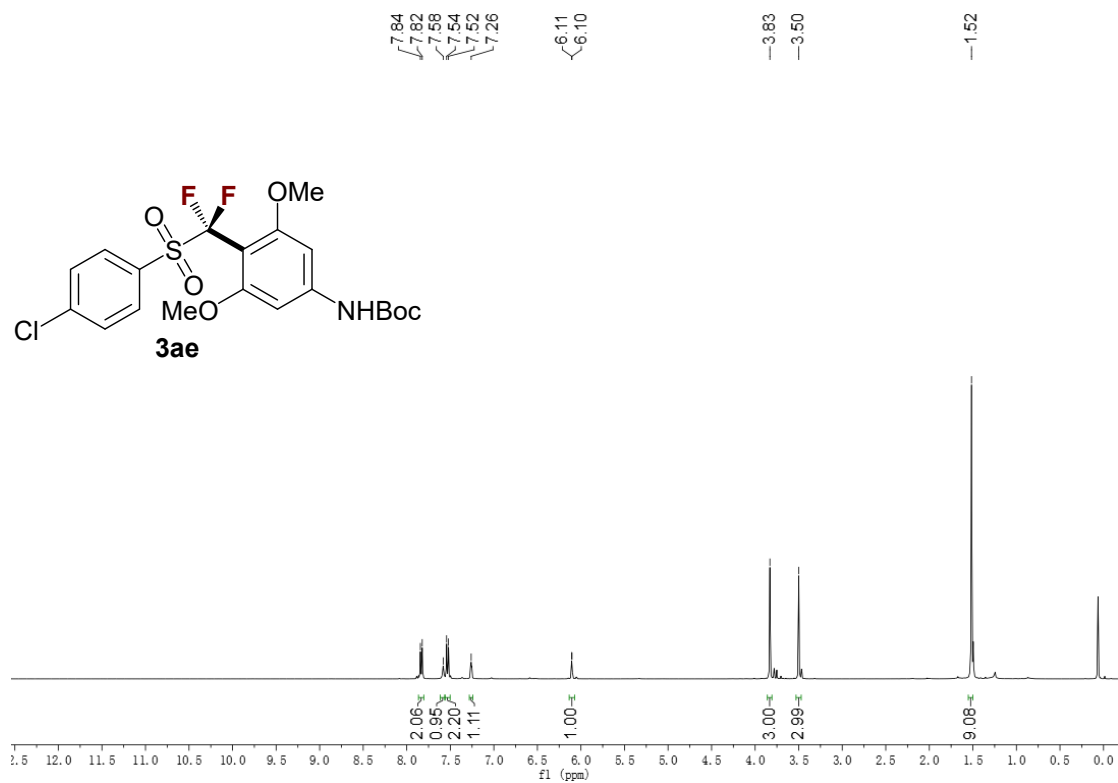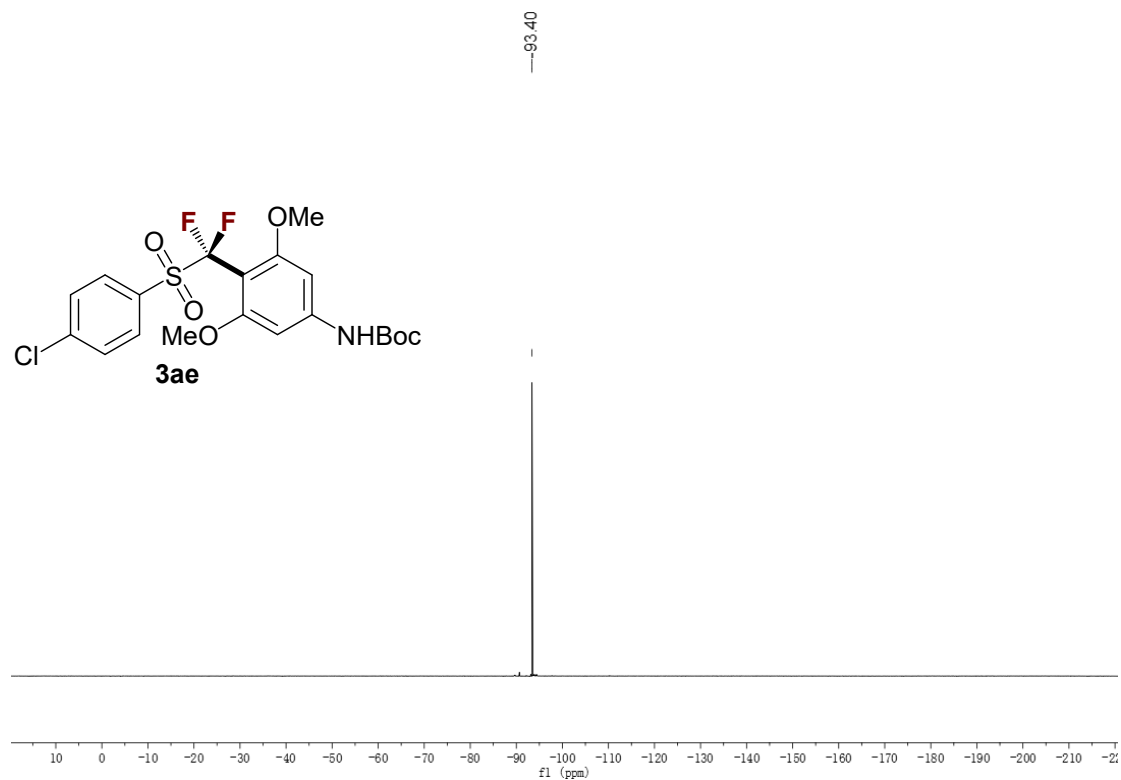

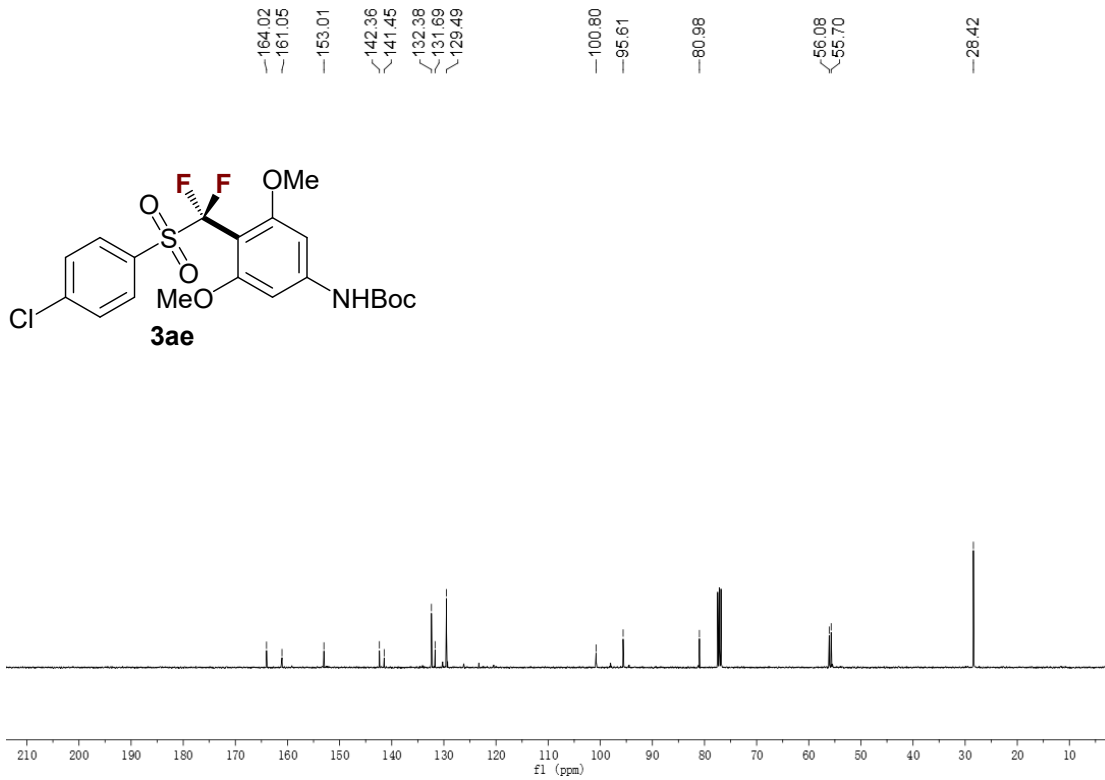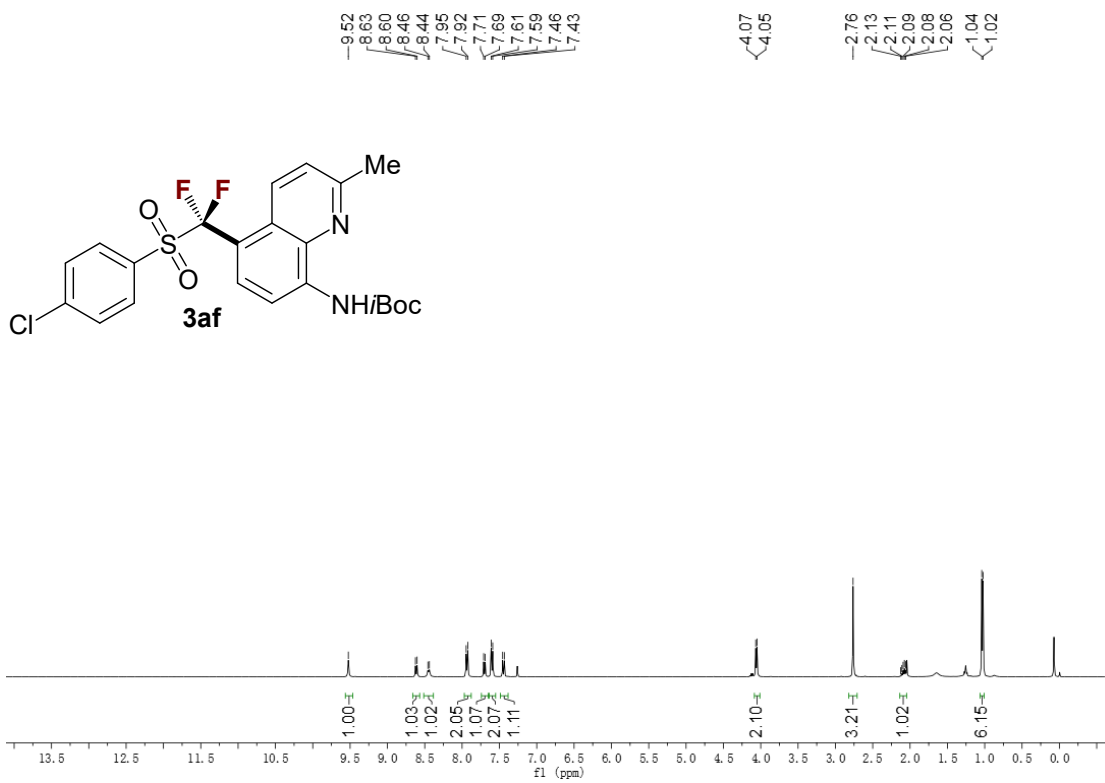

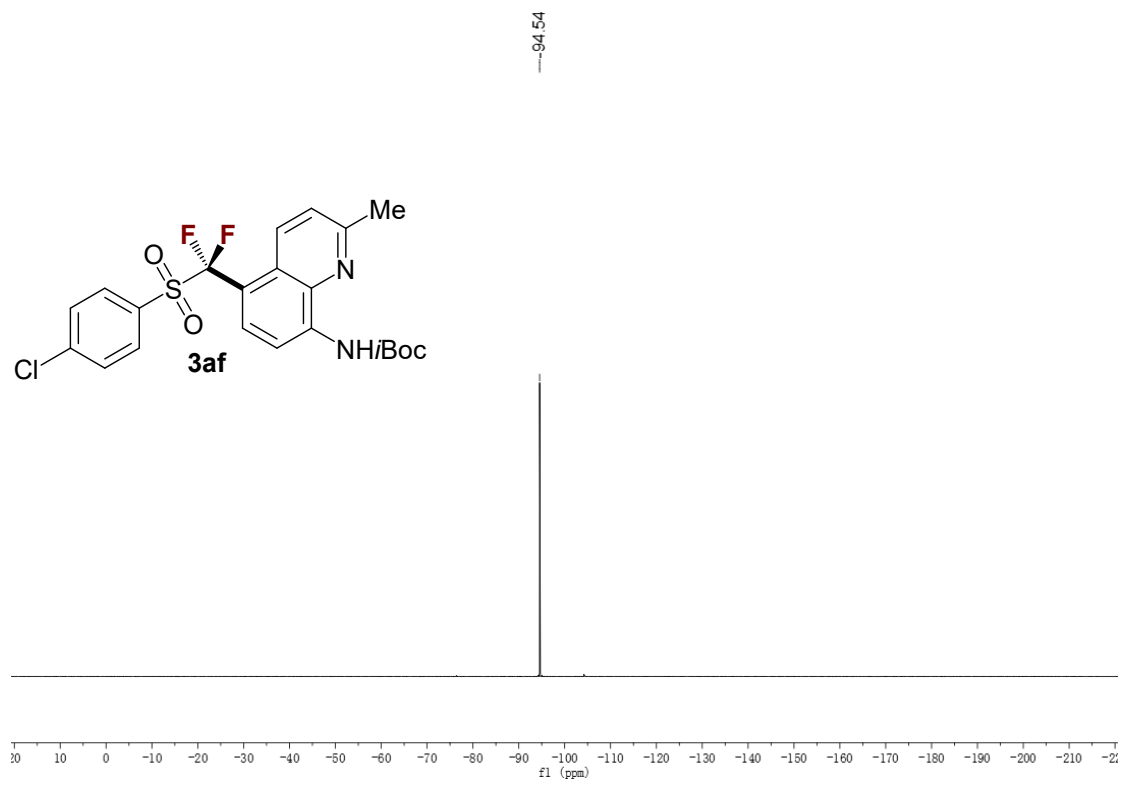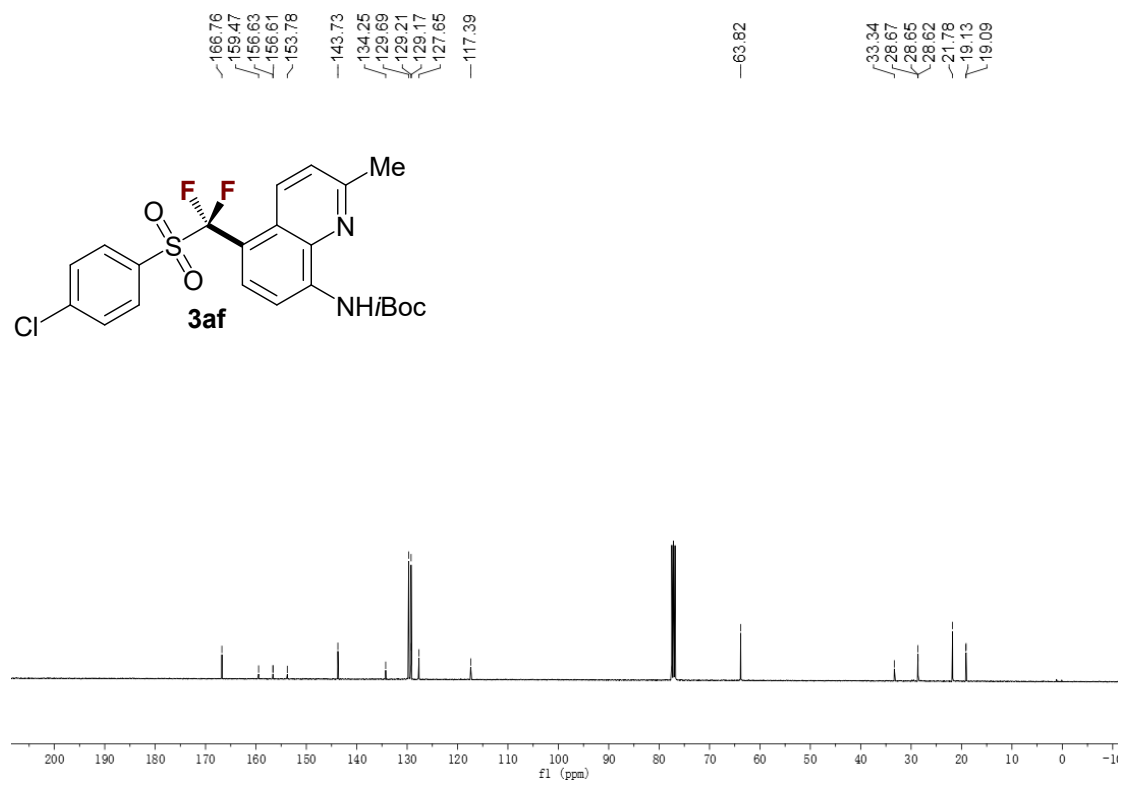

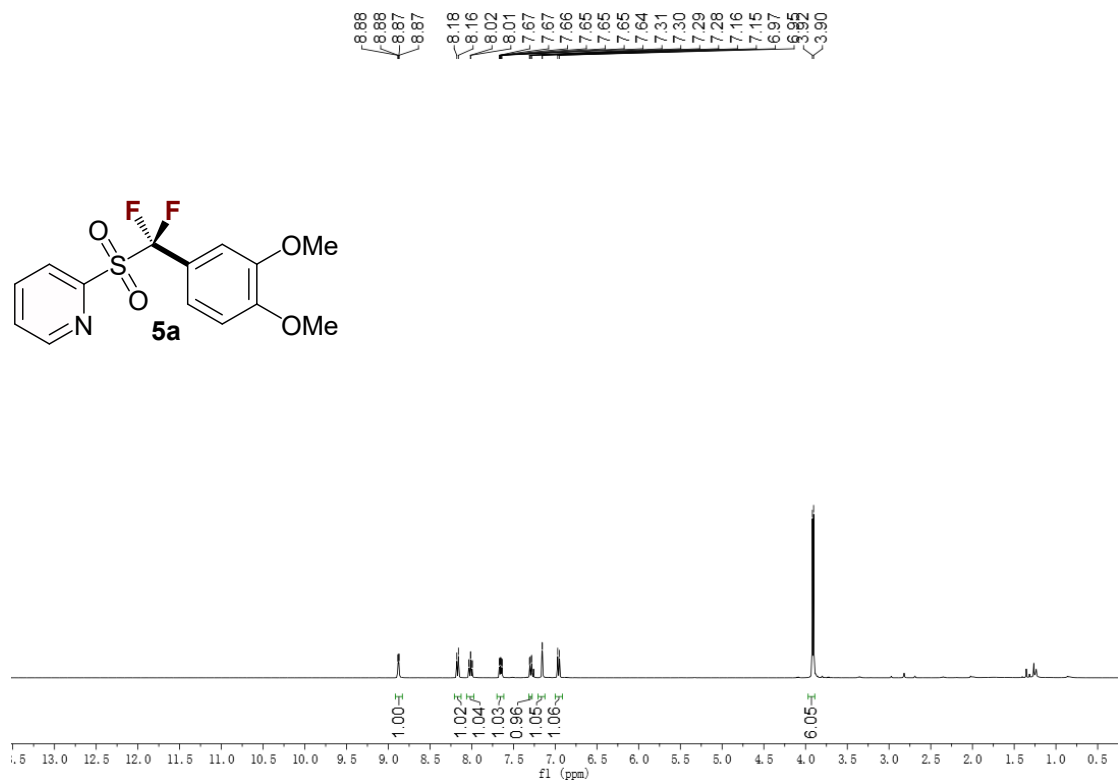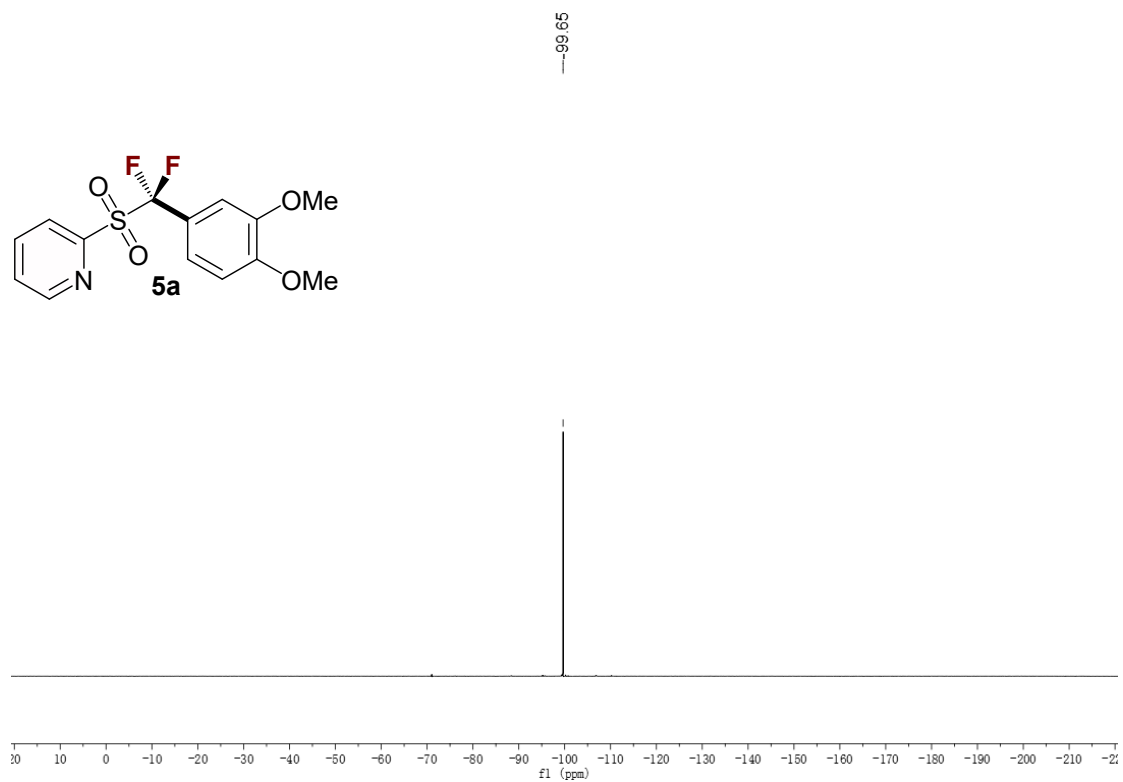

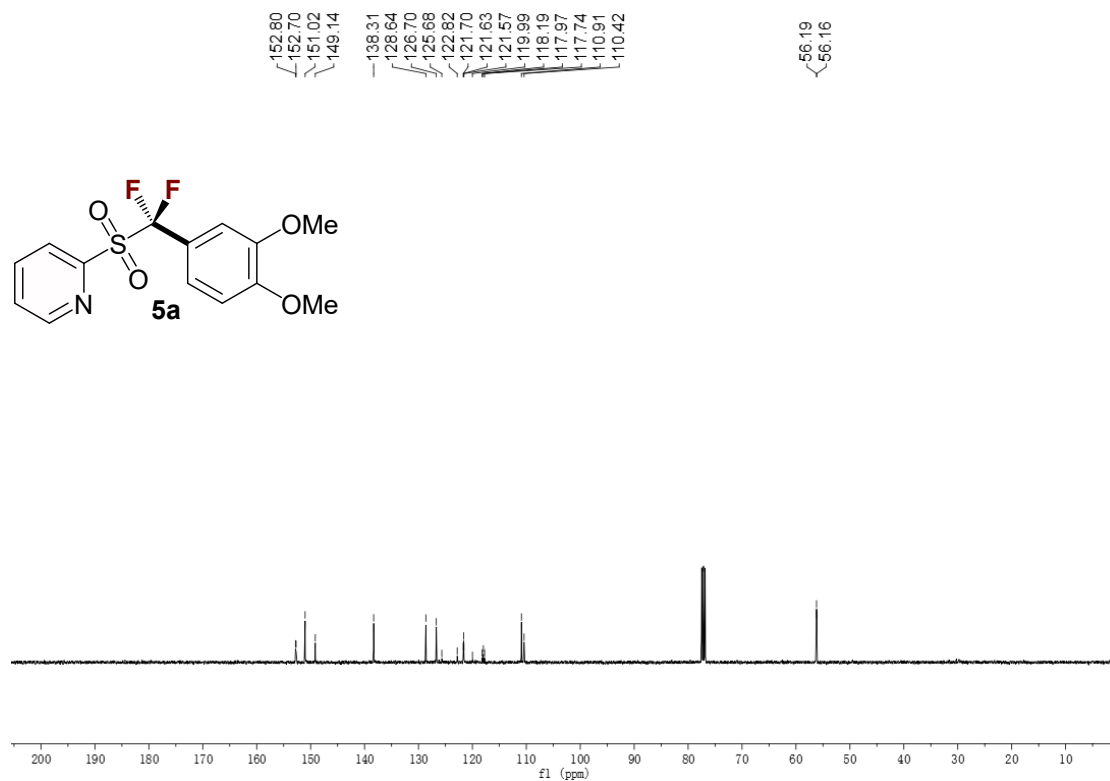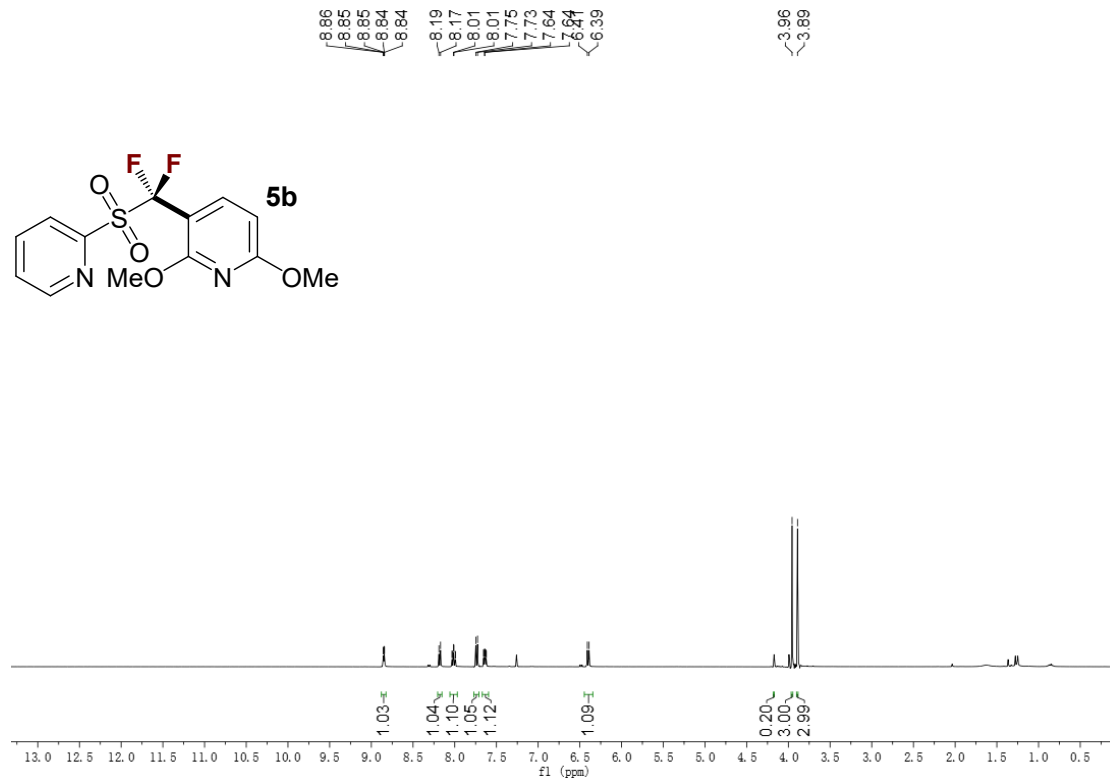

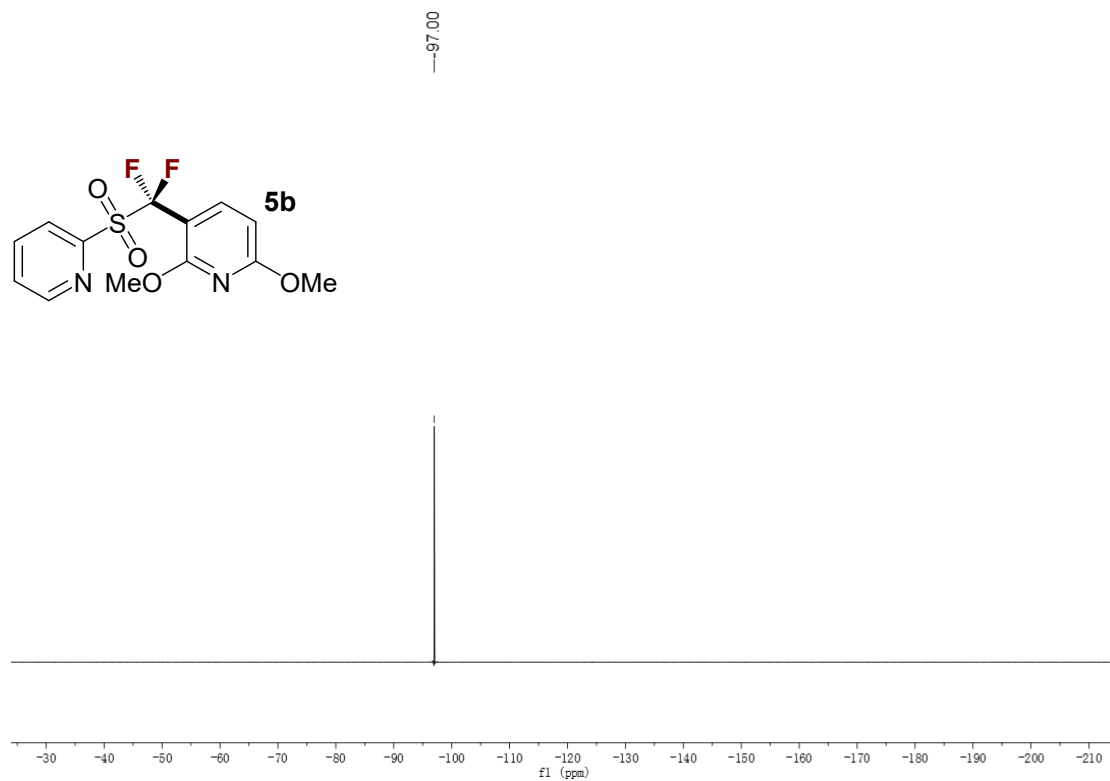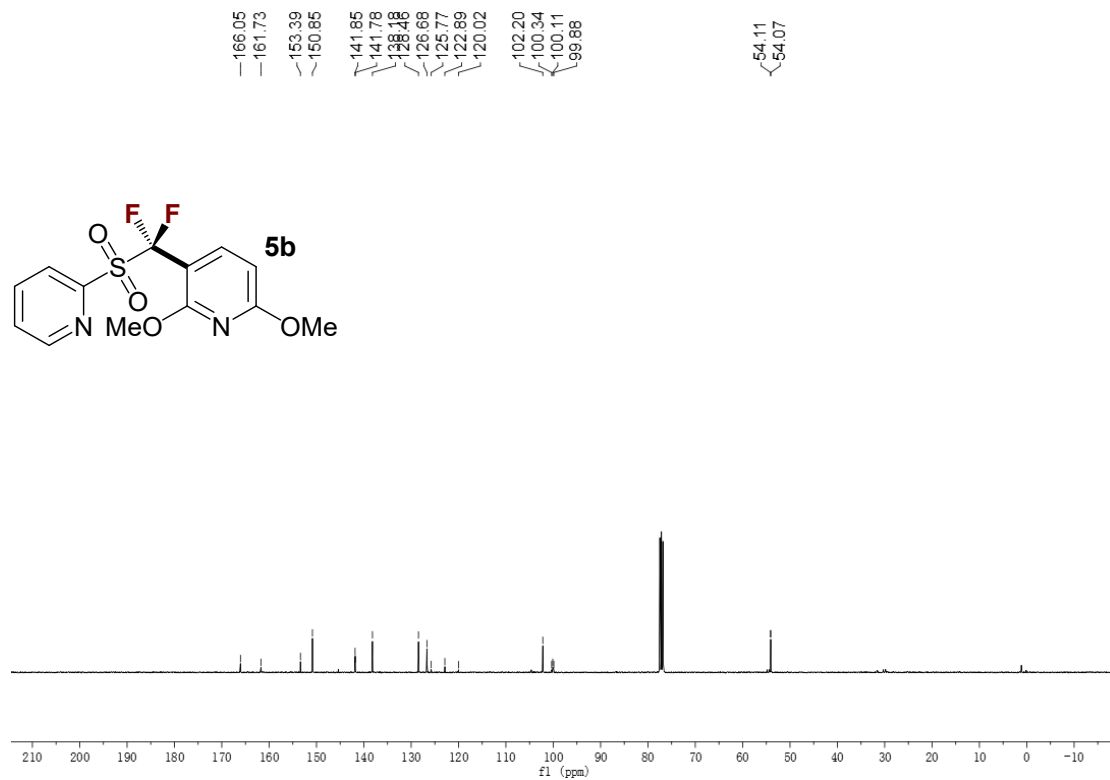

166.05  
 161.73  
 153.39  
 150.85  
 141.85  
 141.78  
 138.48  
 138.48  
 126.68  
 125.77  
 122.89  
 120.02  
 102.20  
 100.34  
 100.11  
 99.88  
 54.11  
 54.07

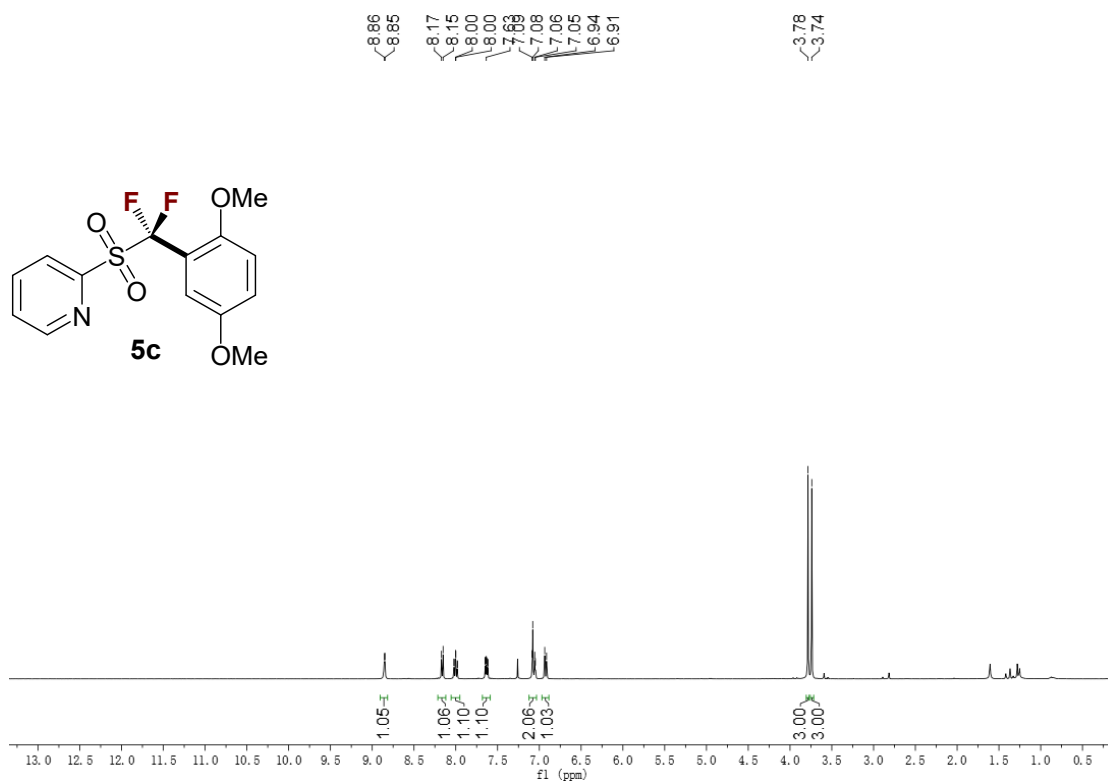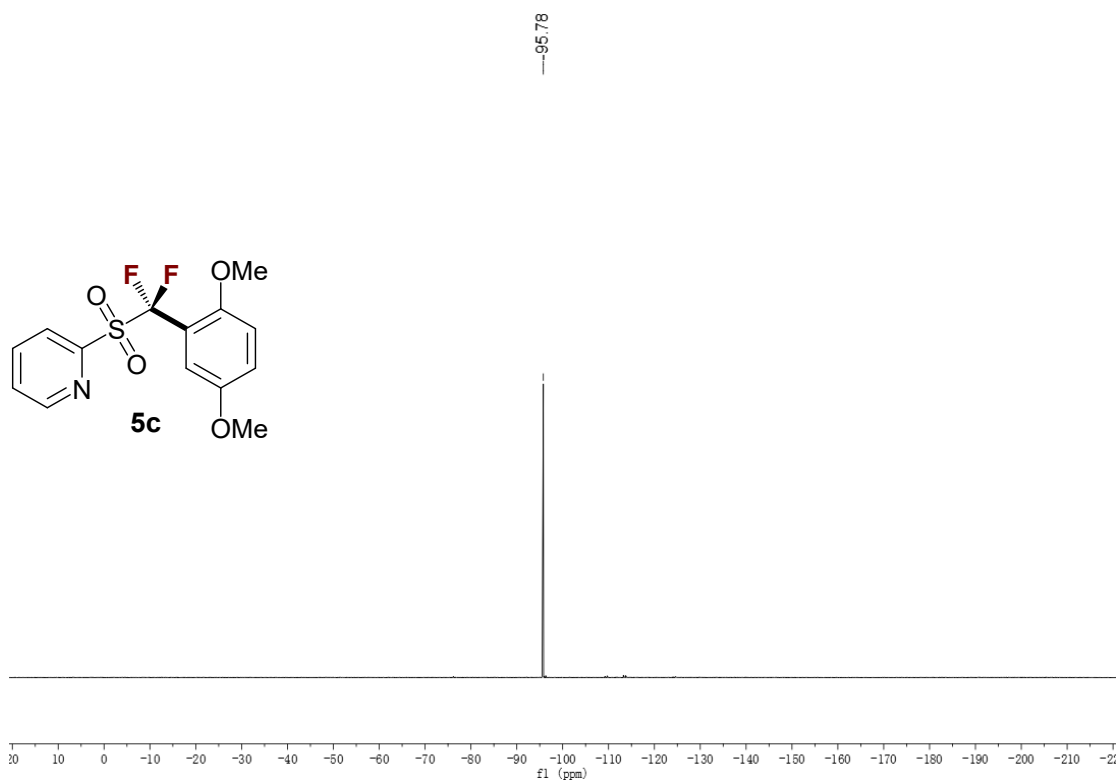

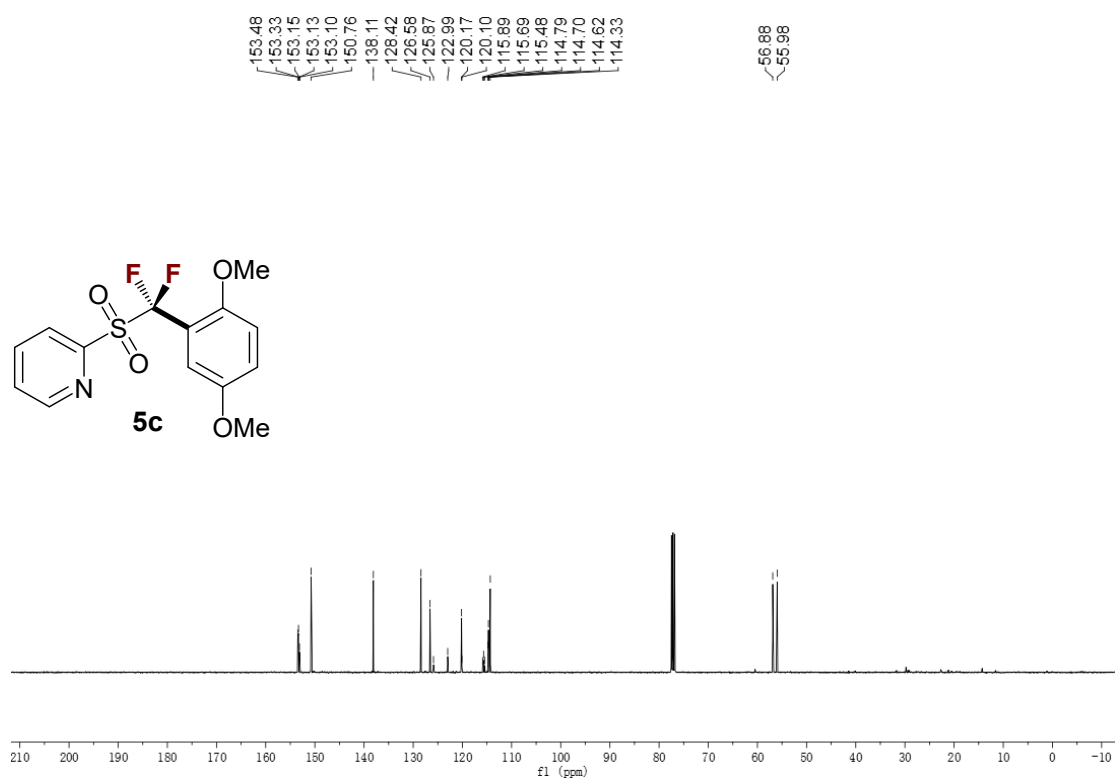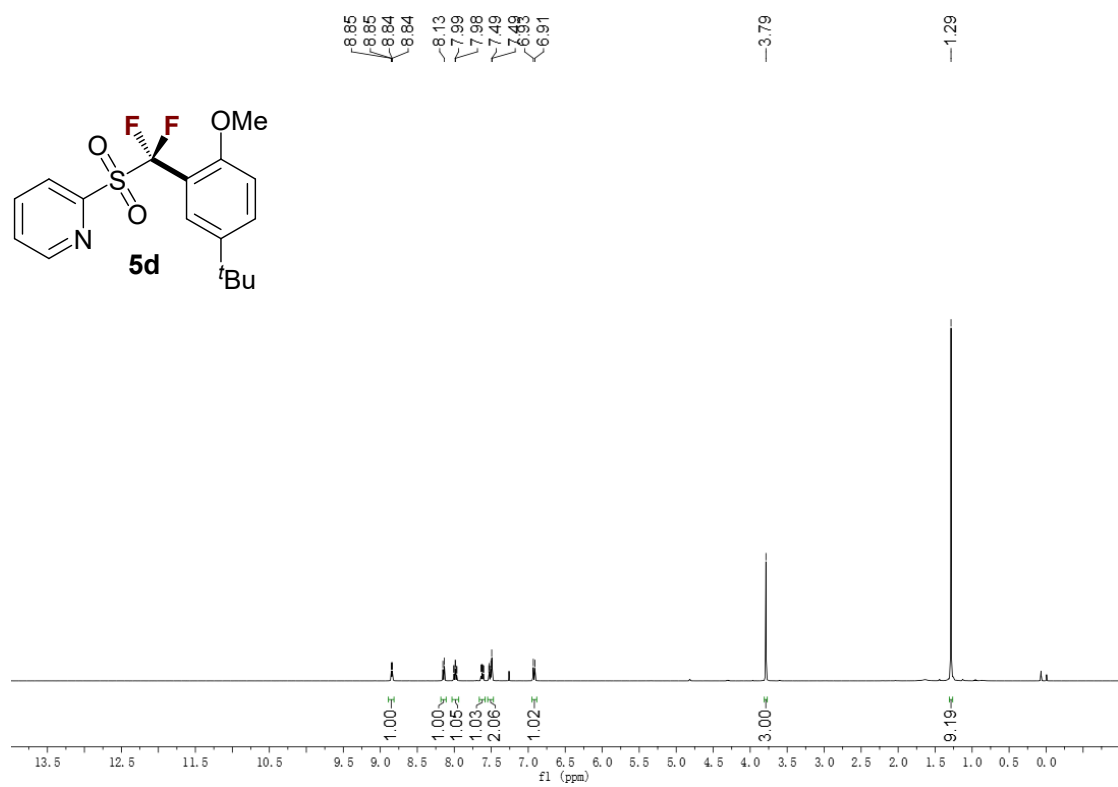



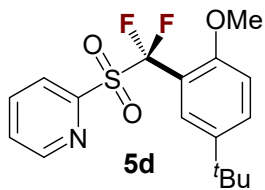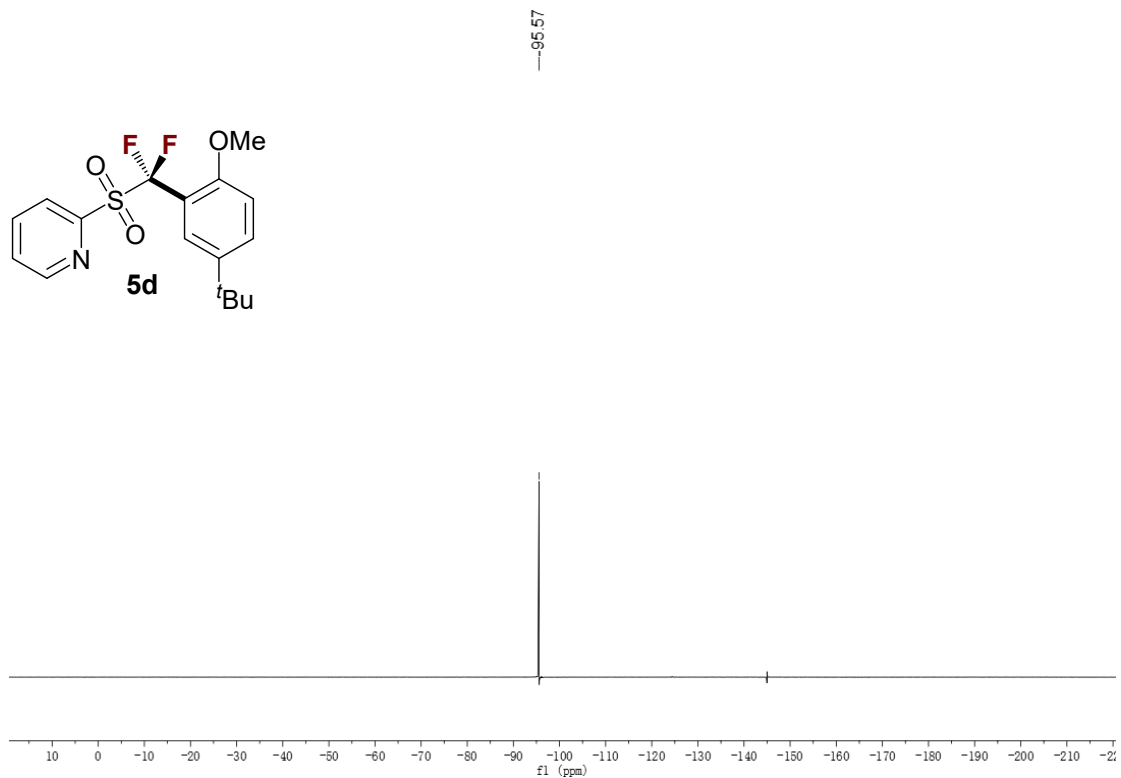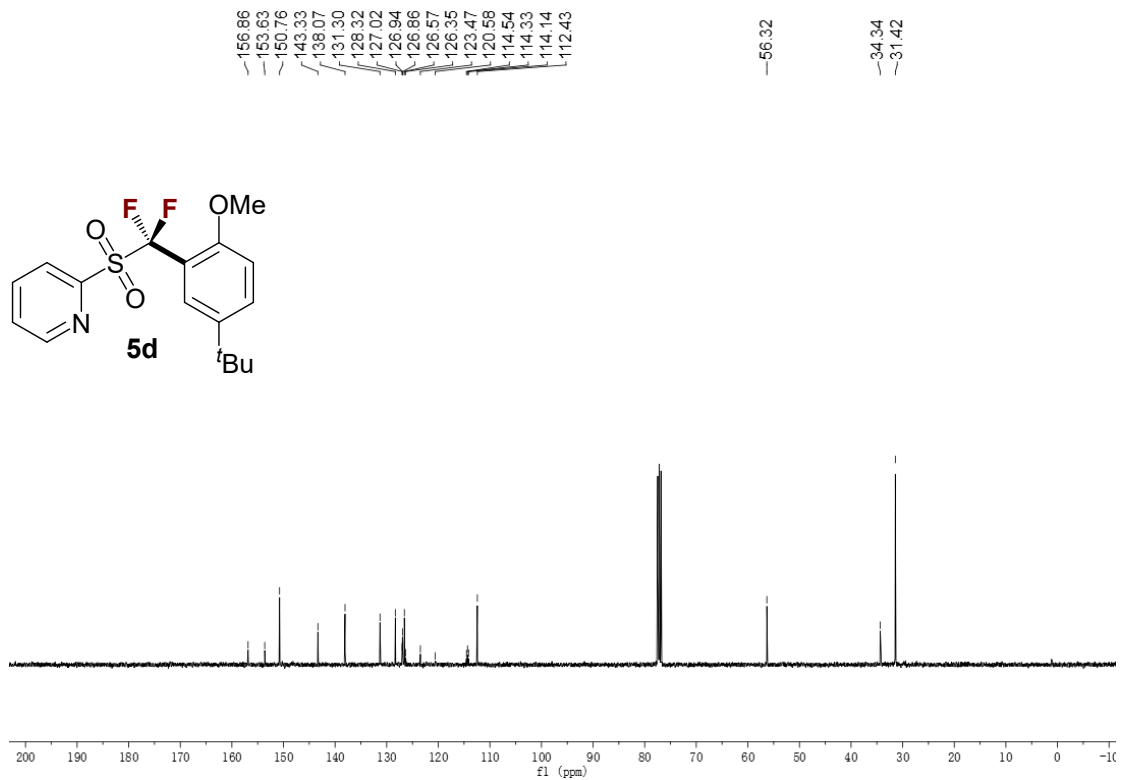

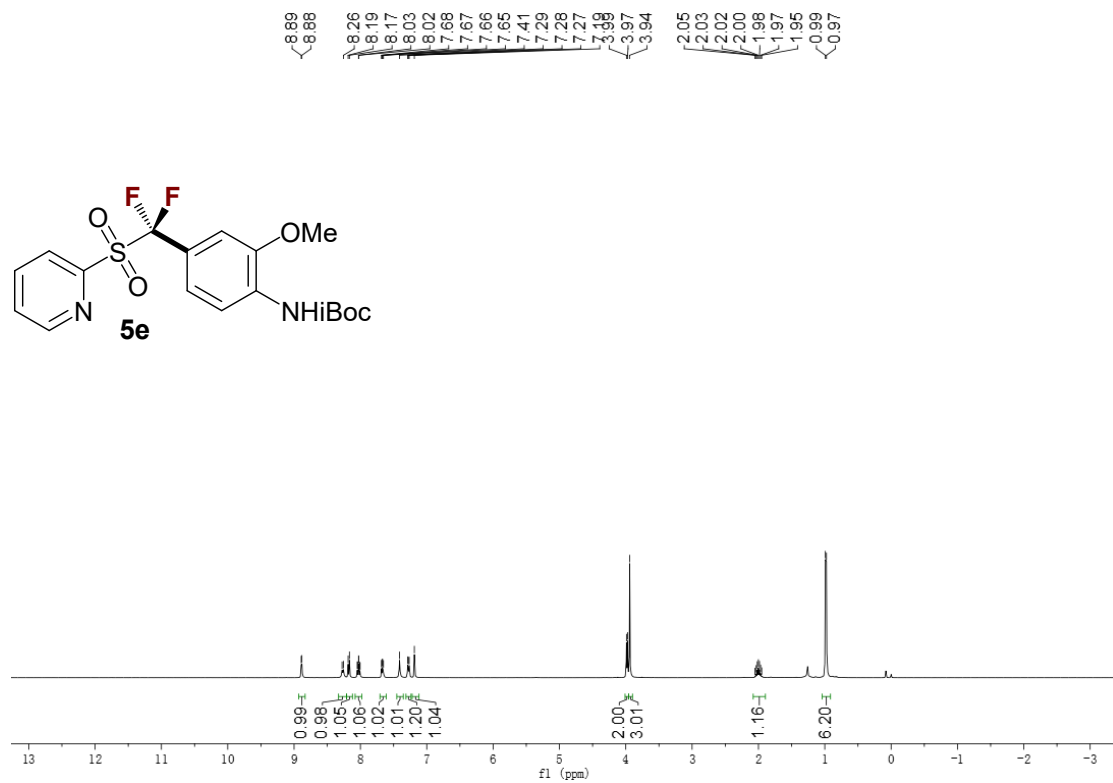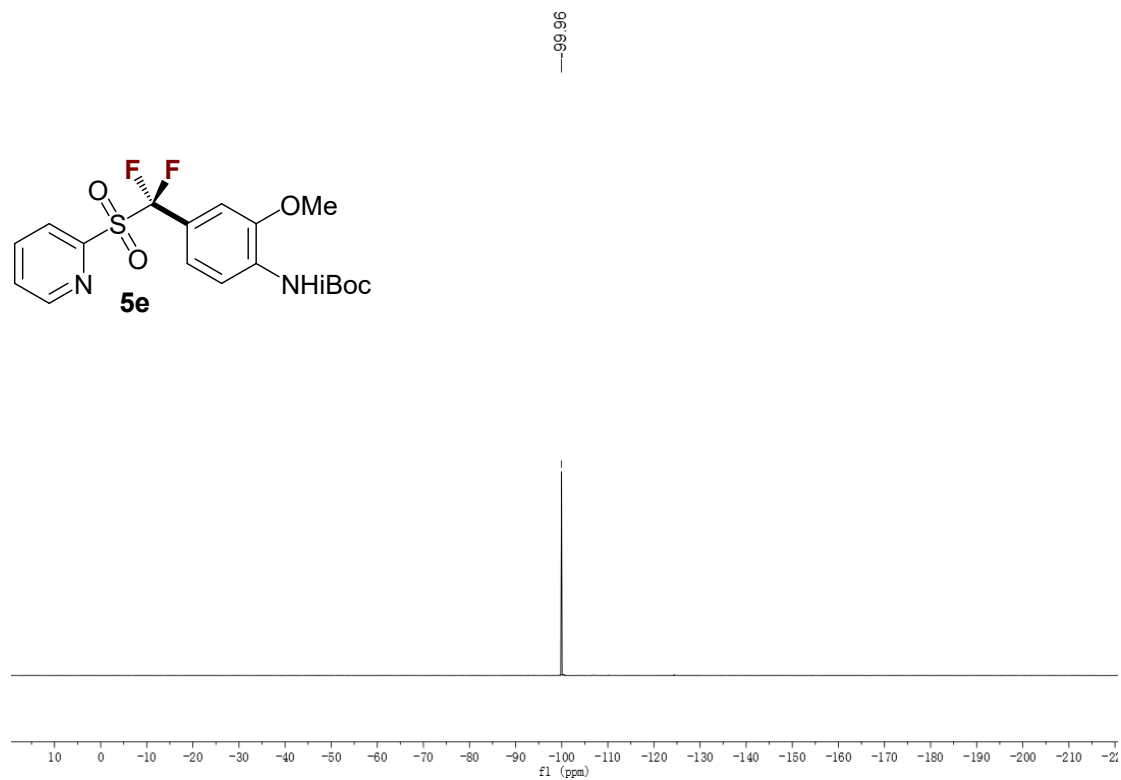

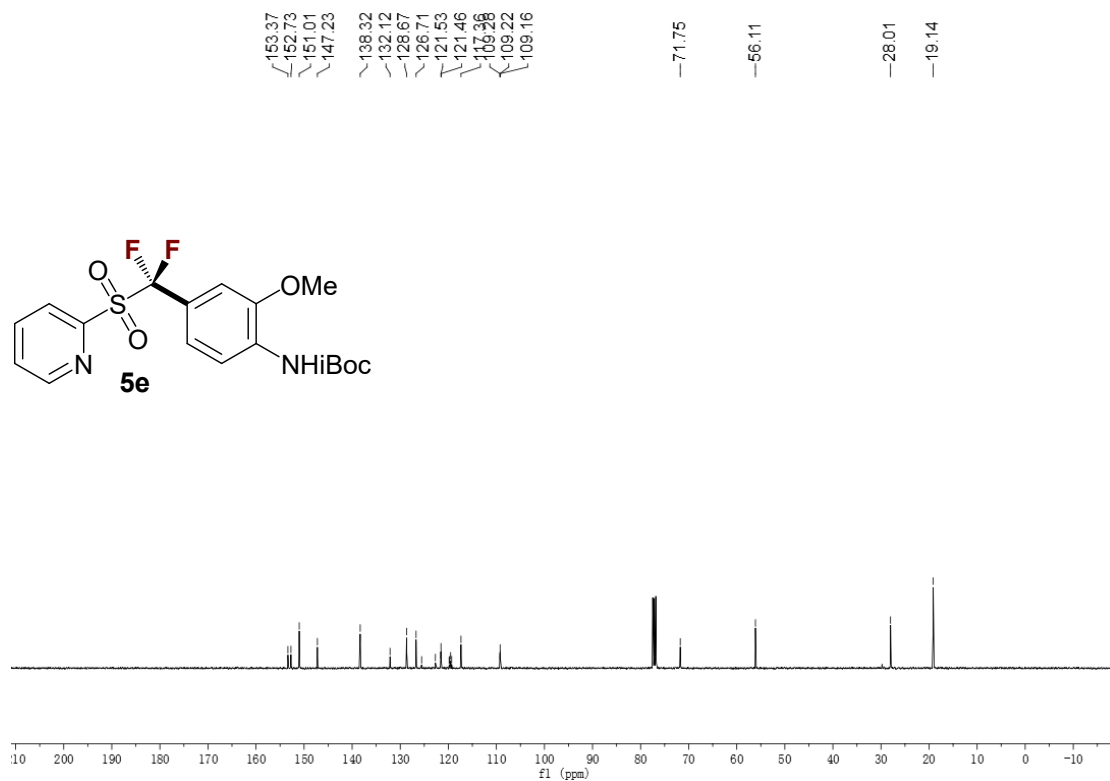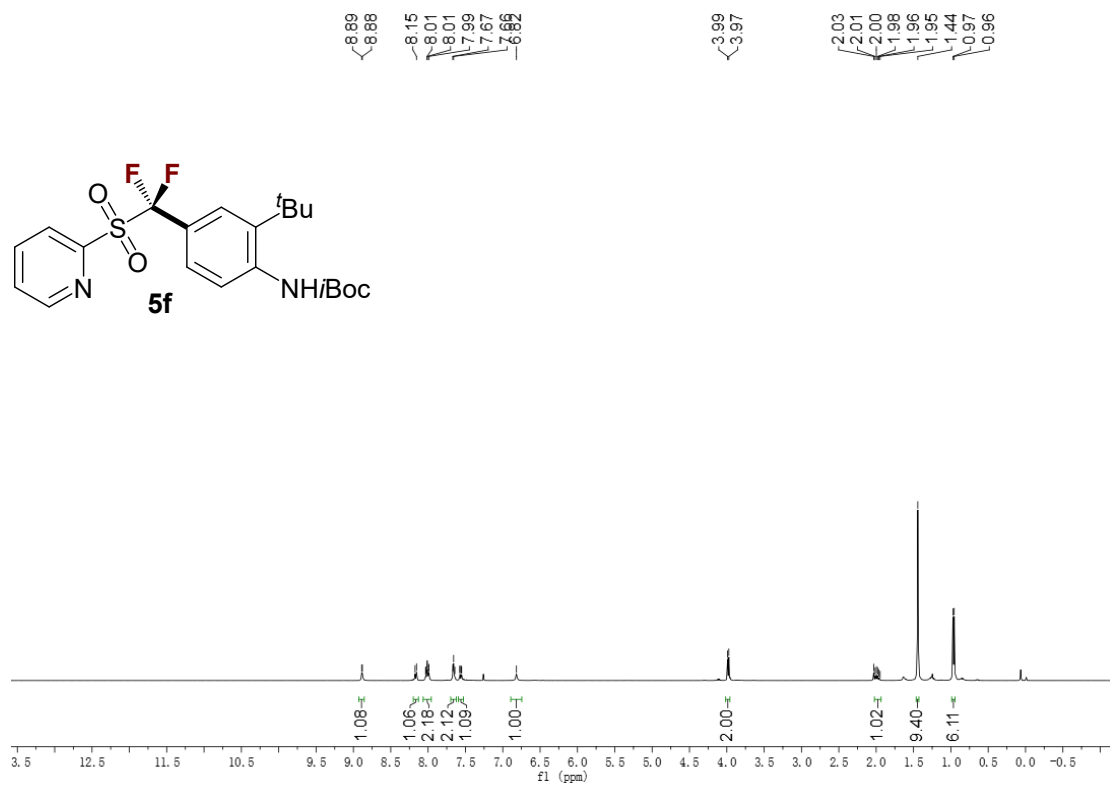

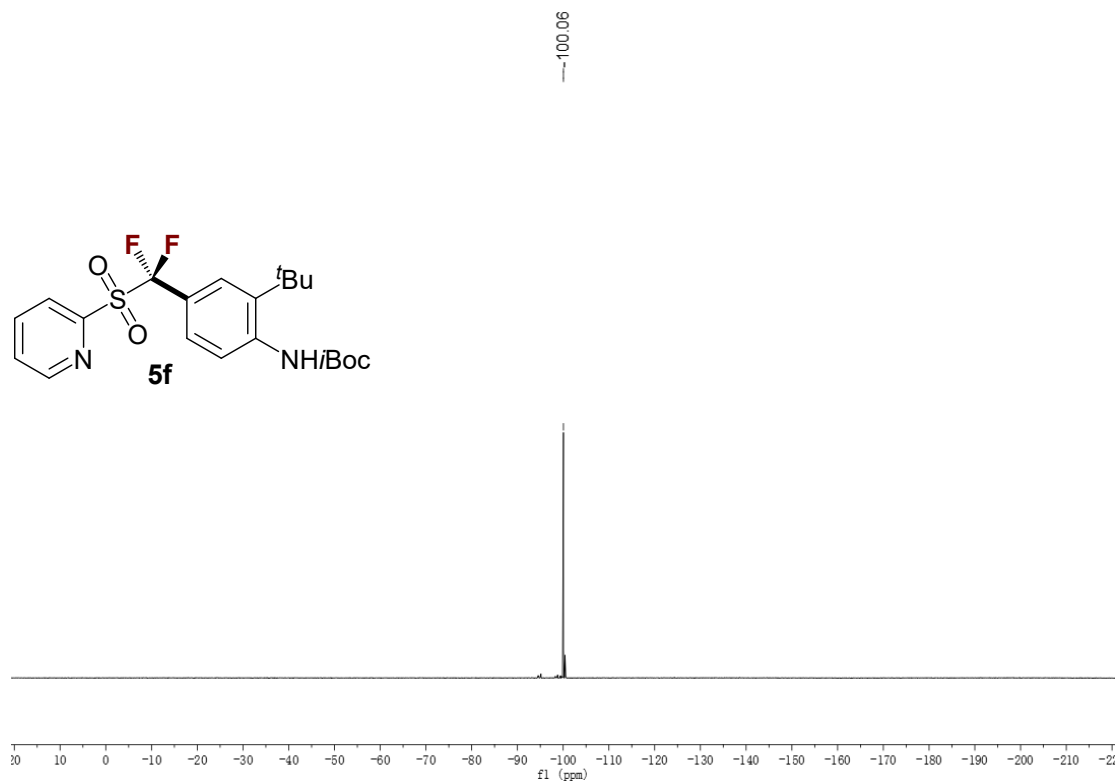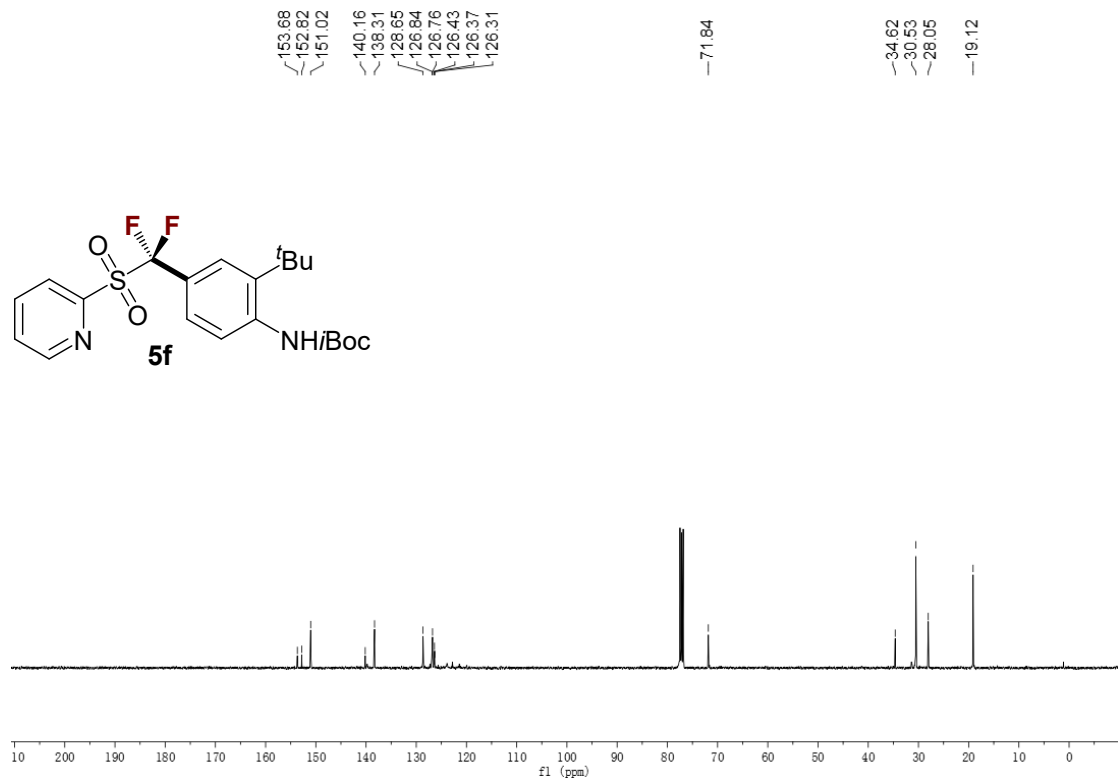

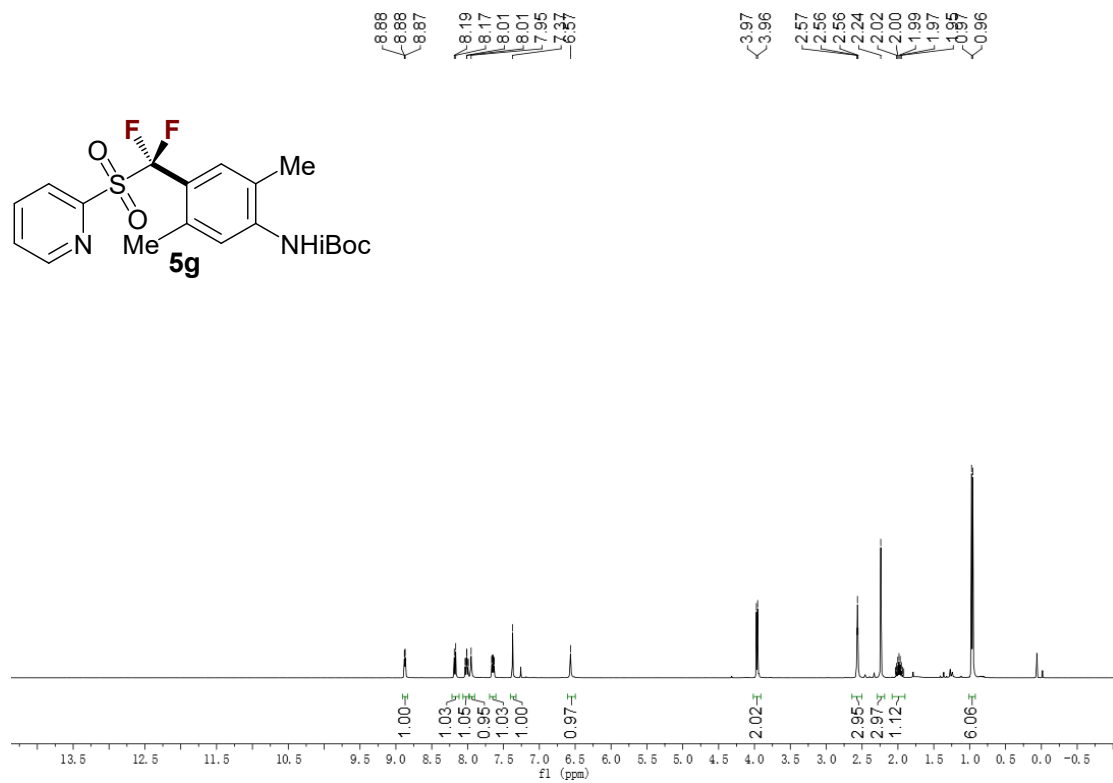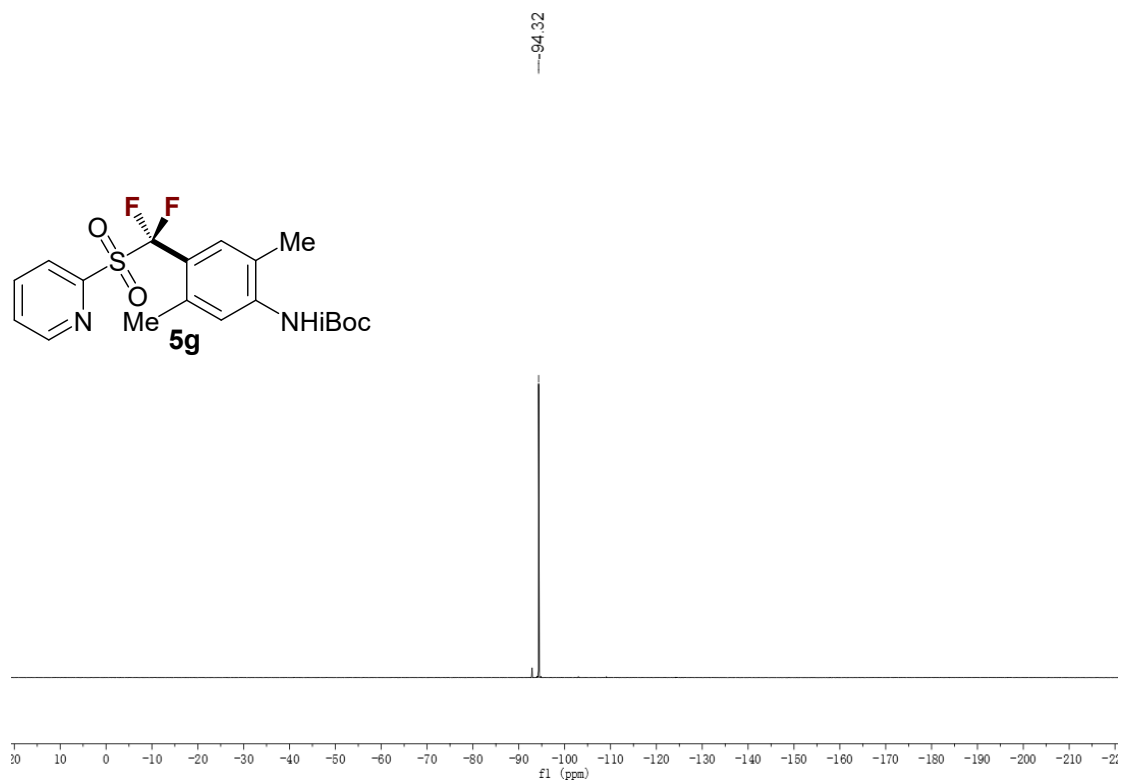

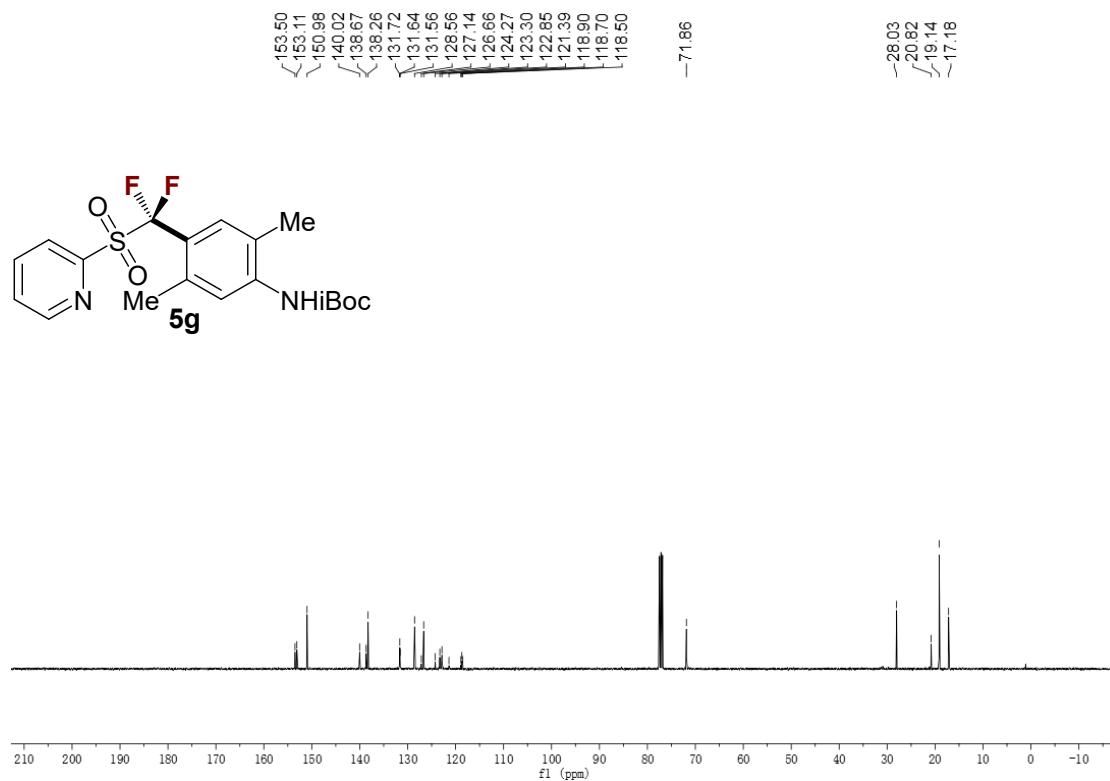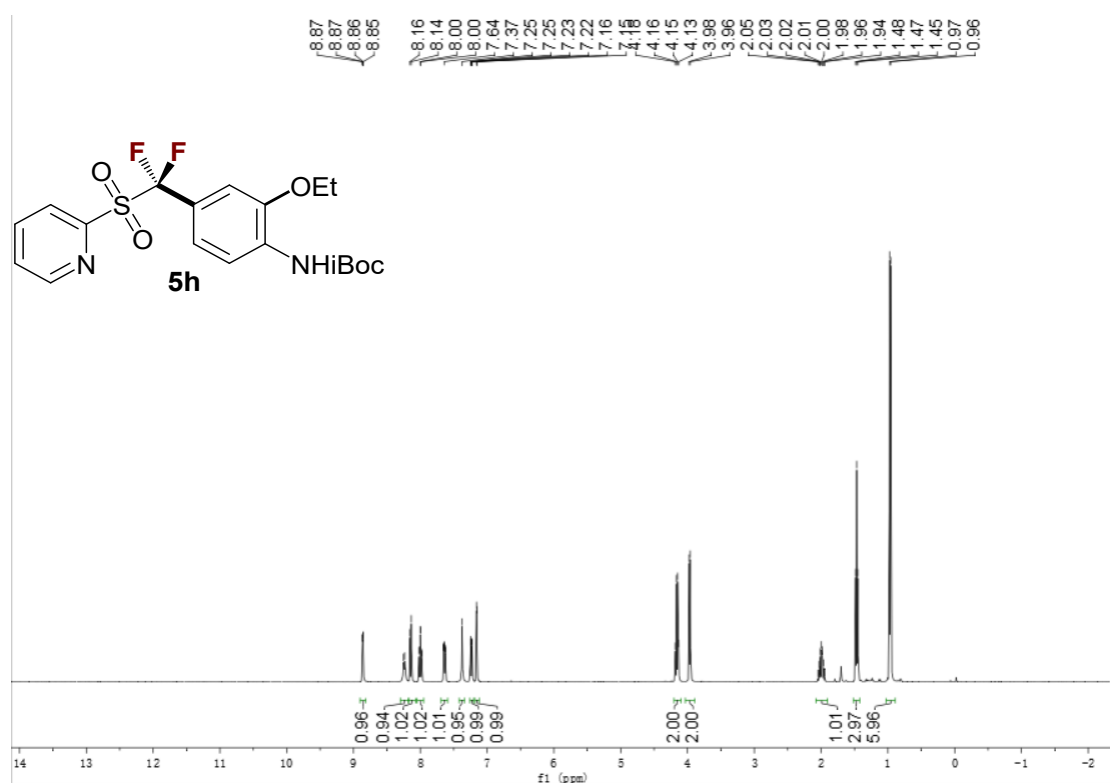

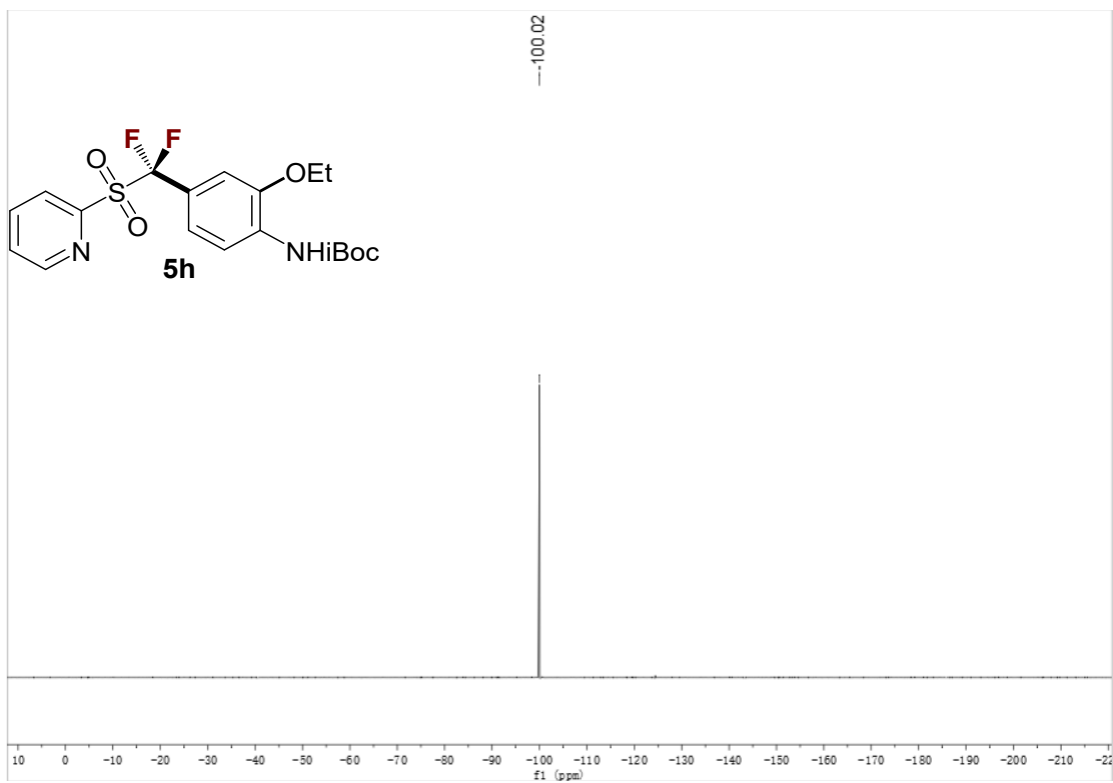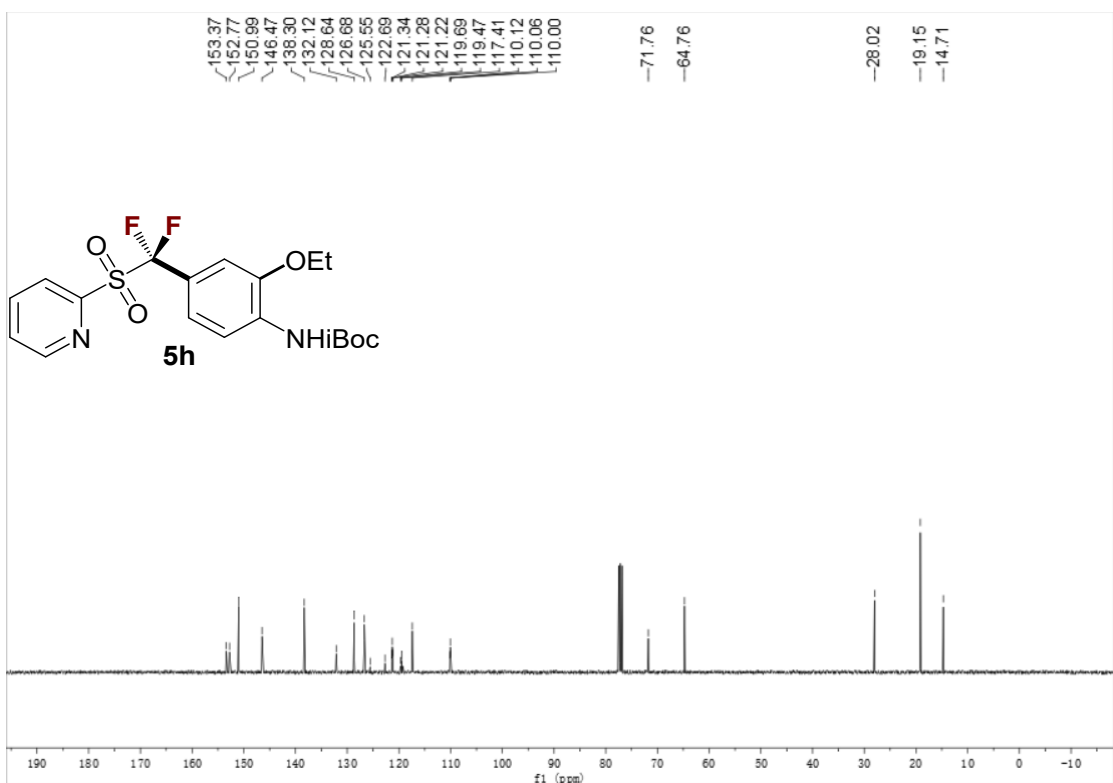

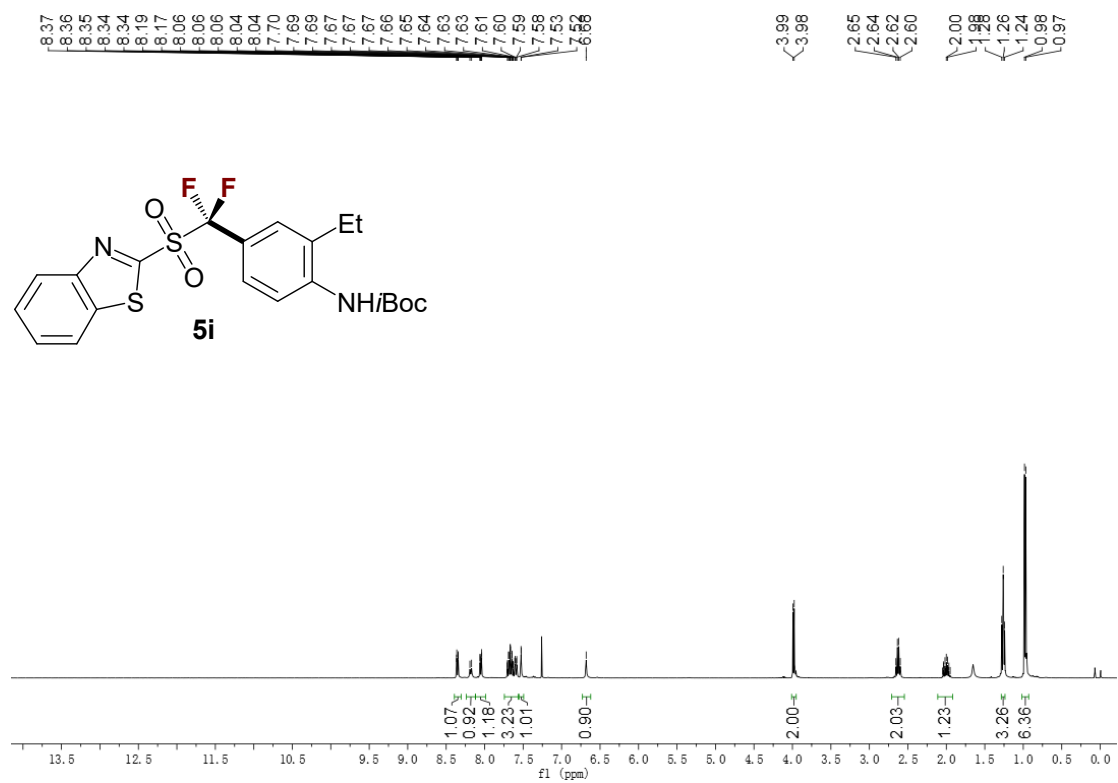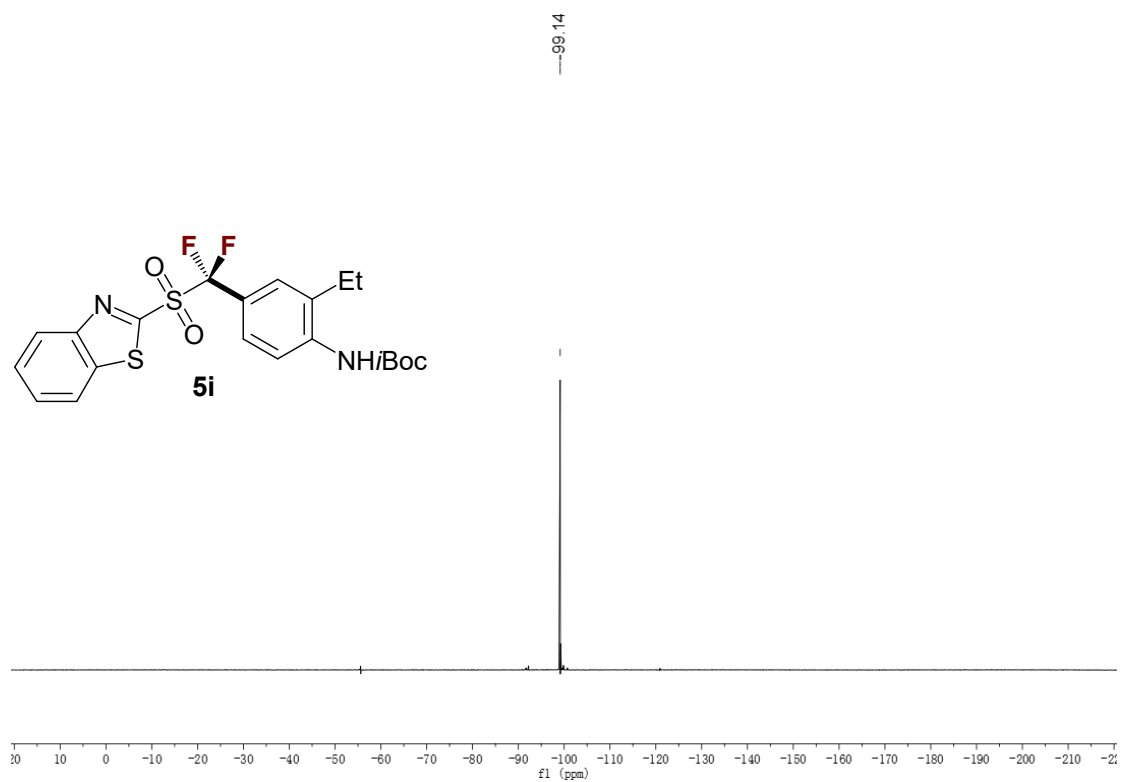



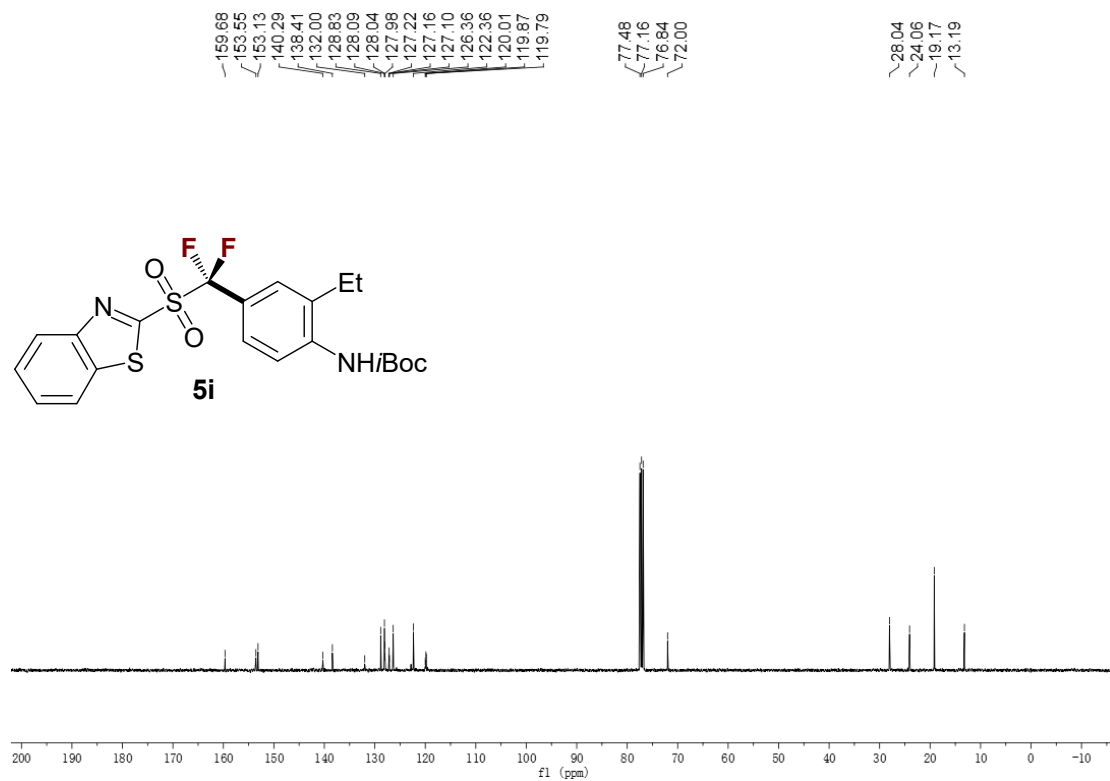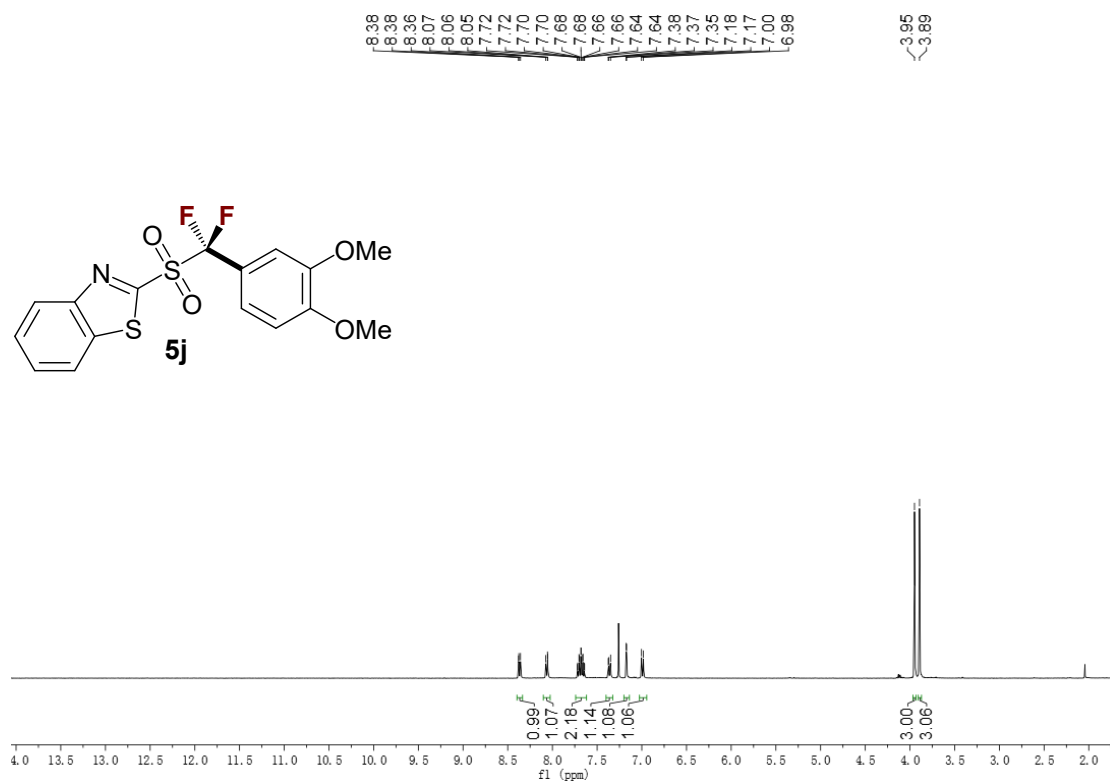

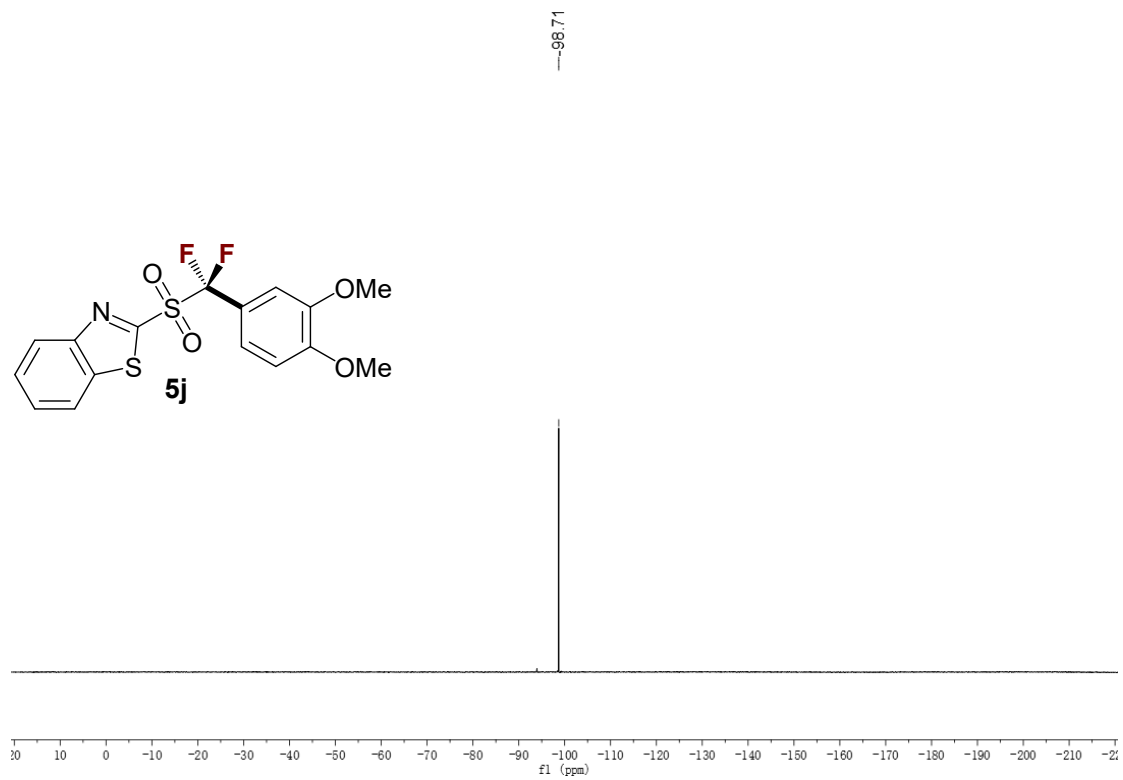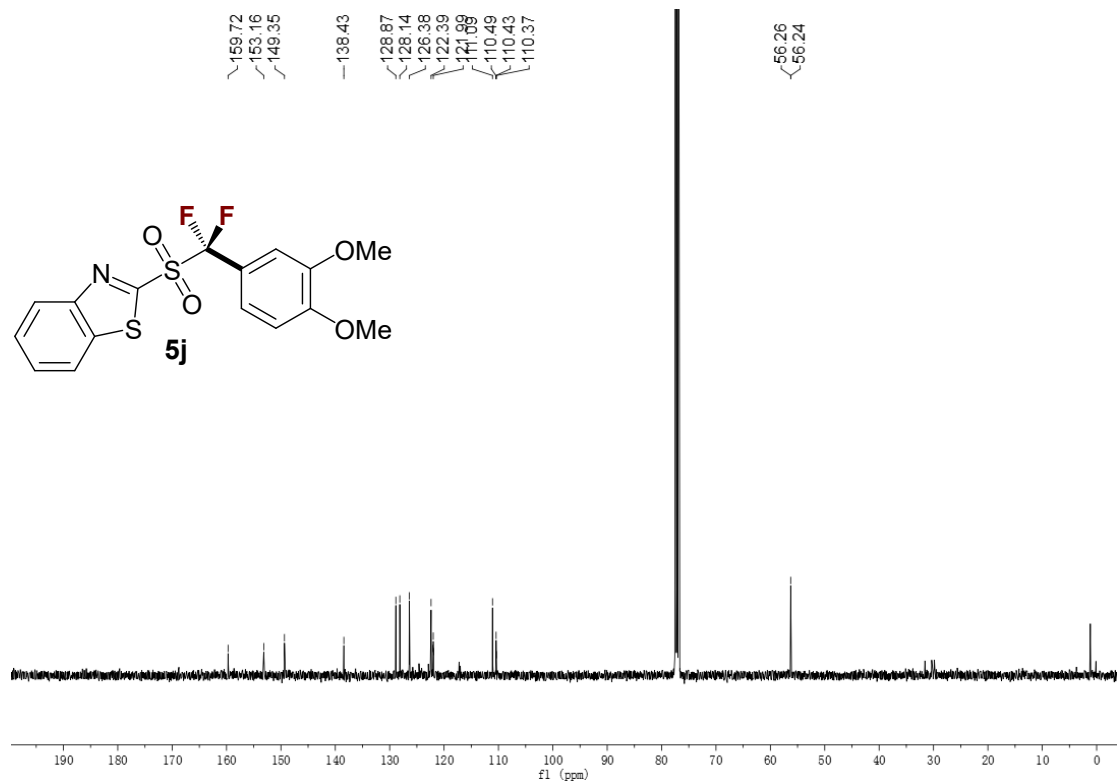

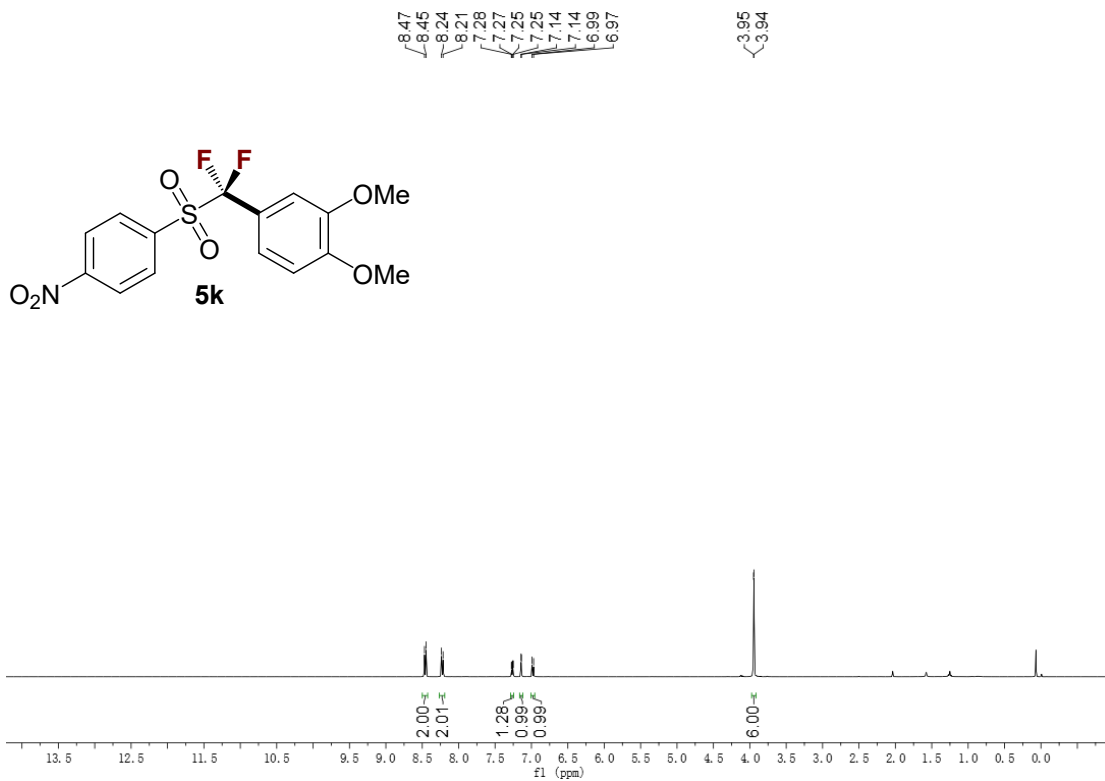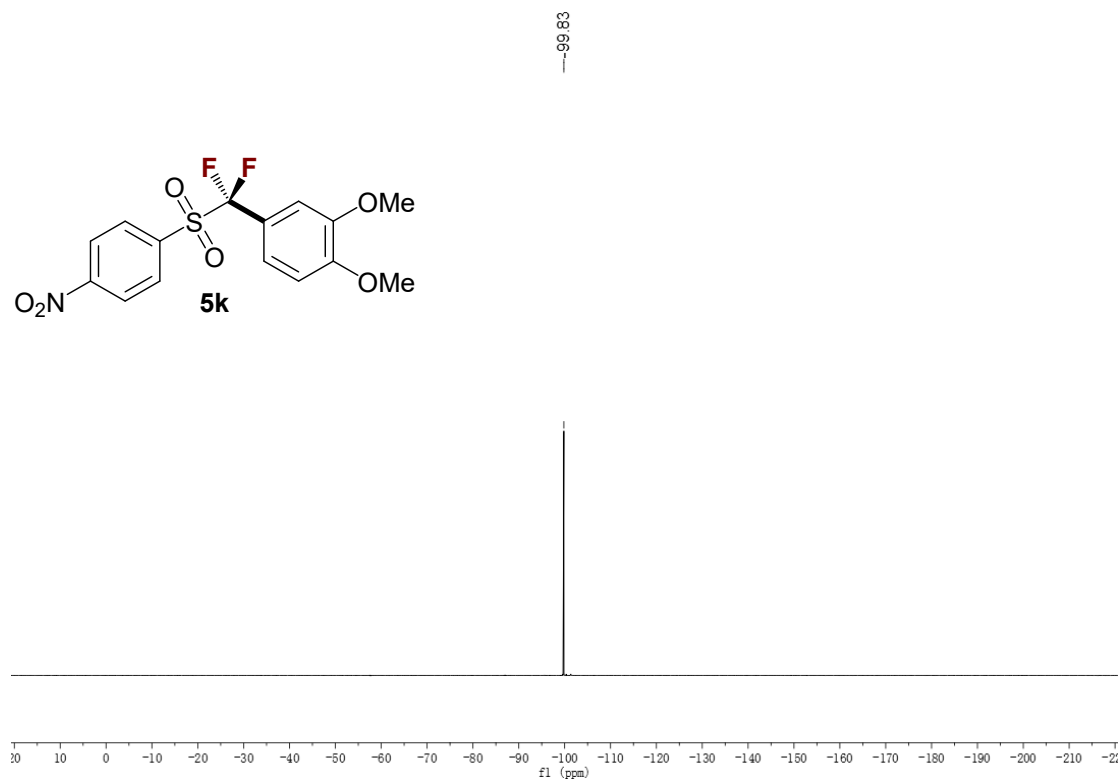

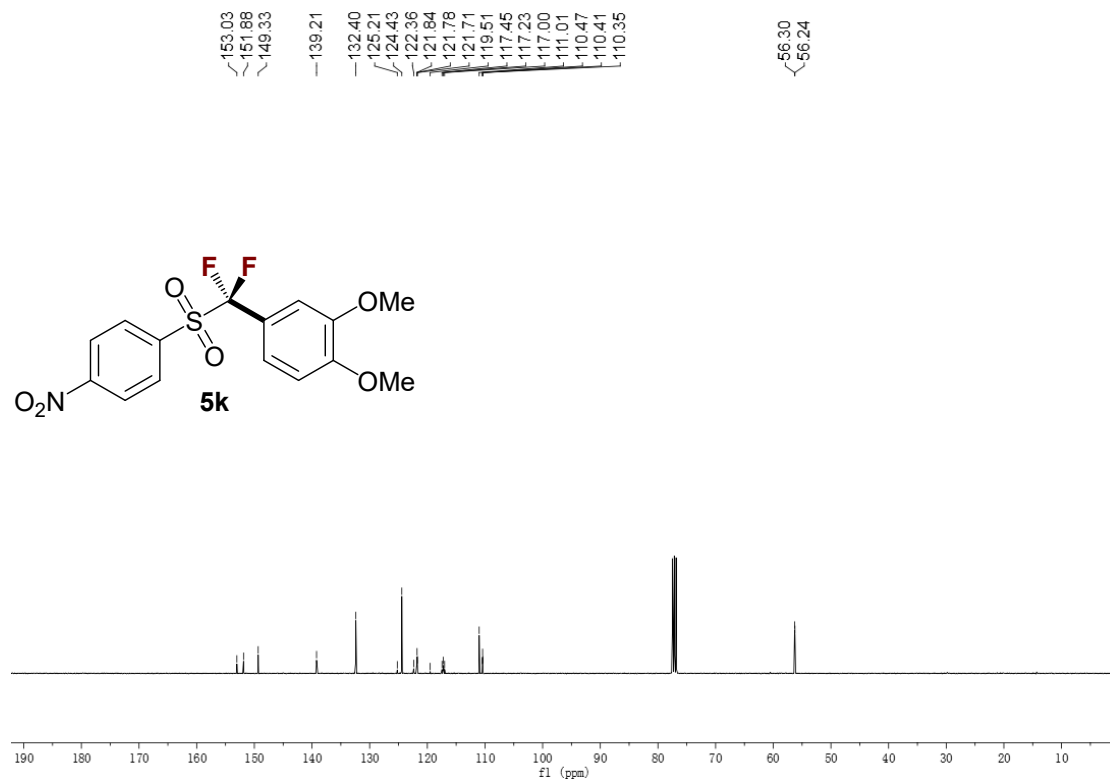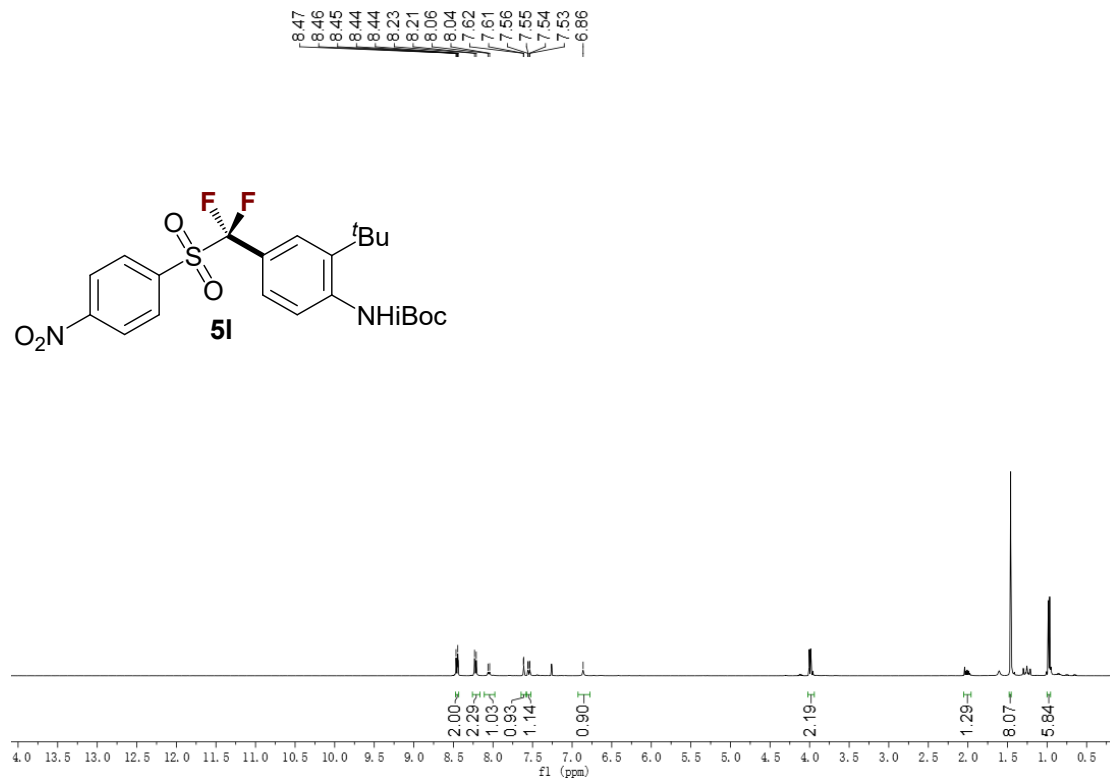

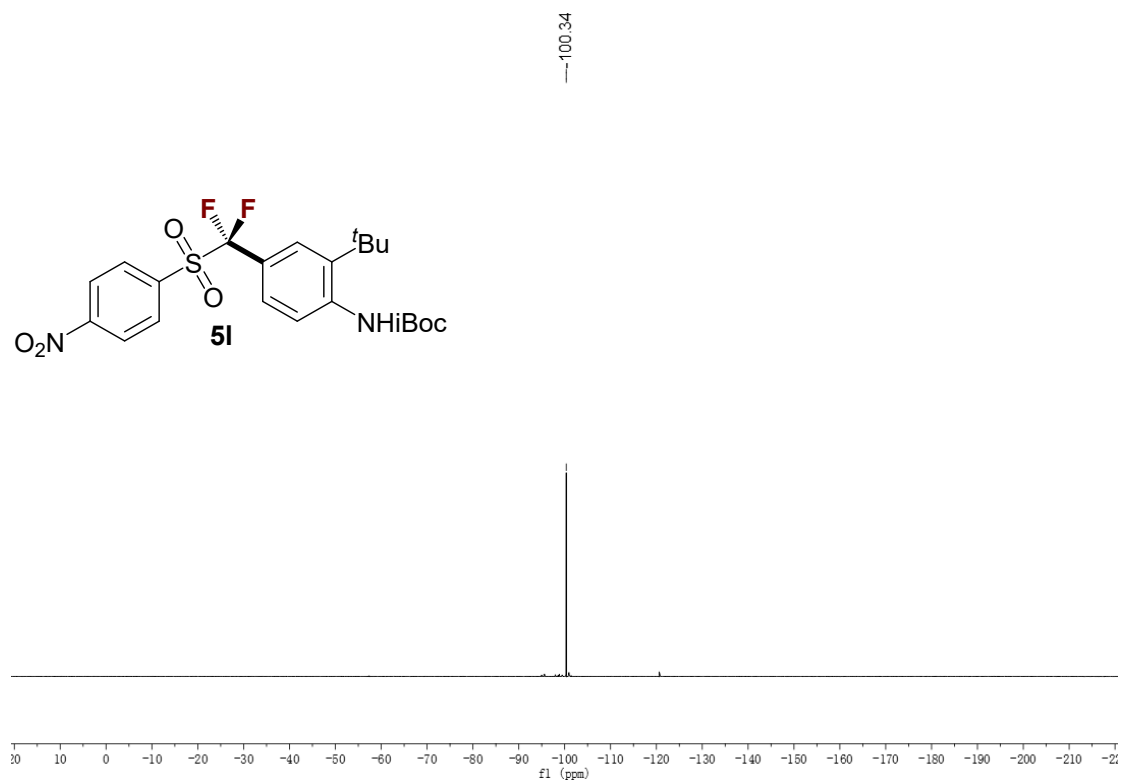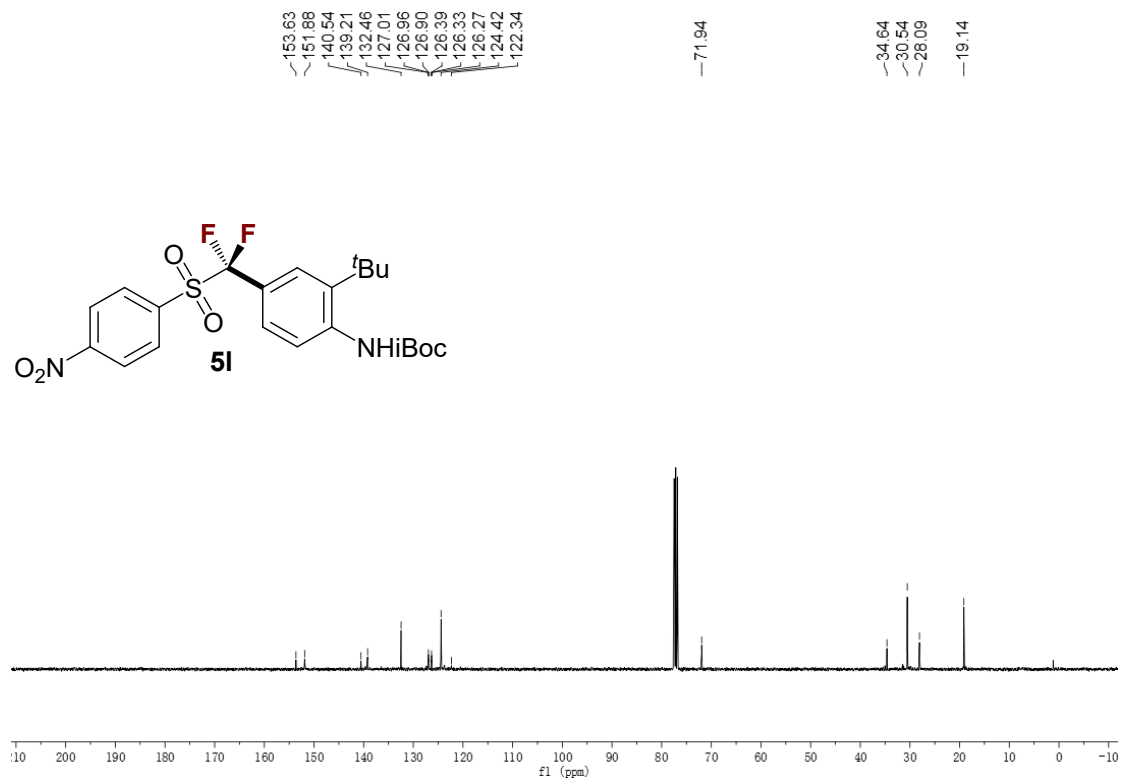

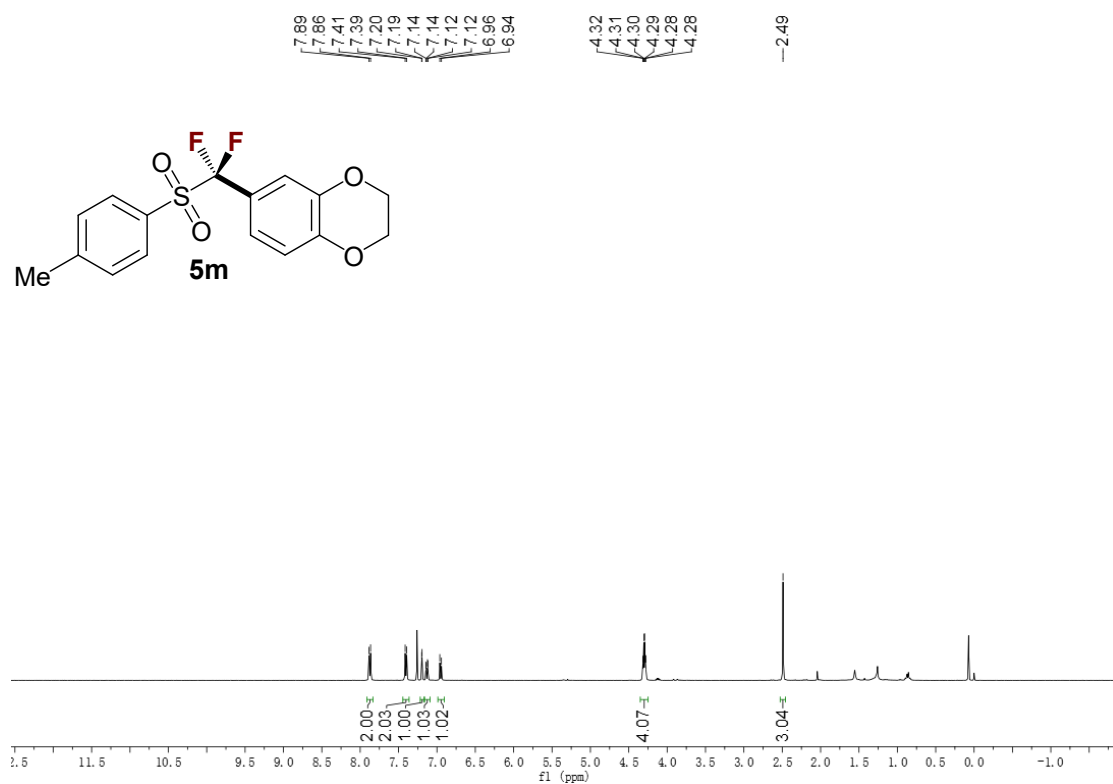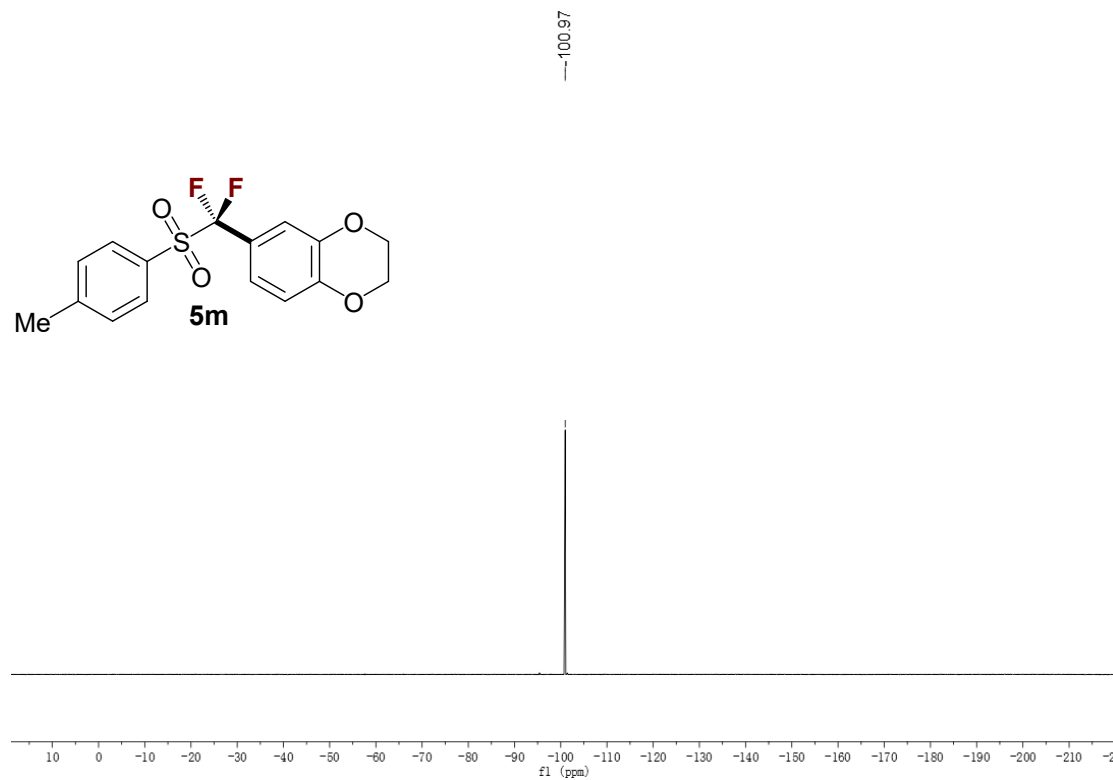

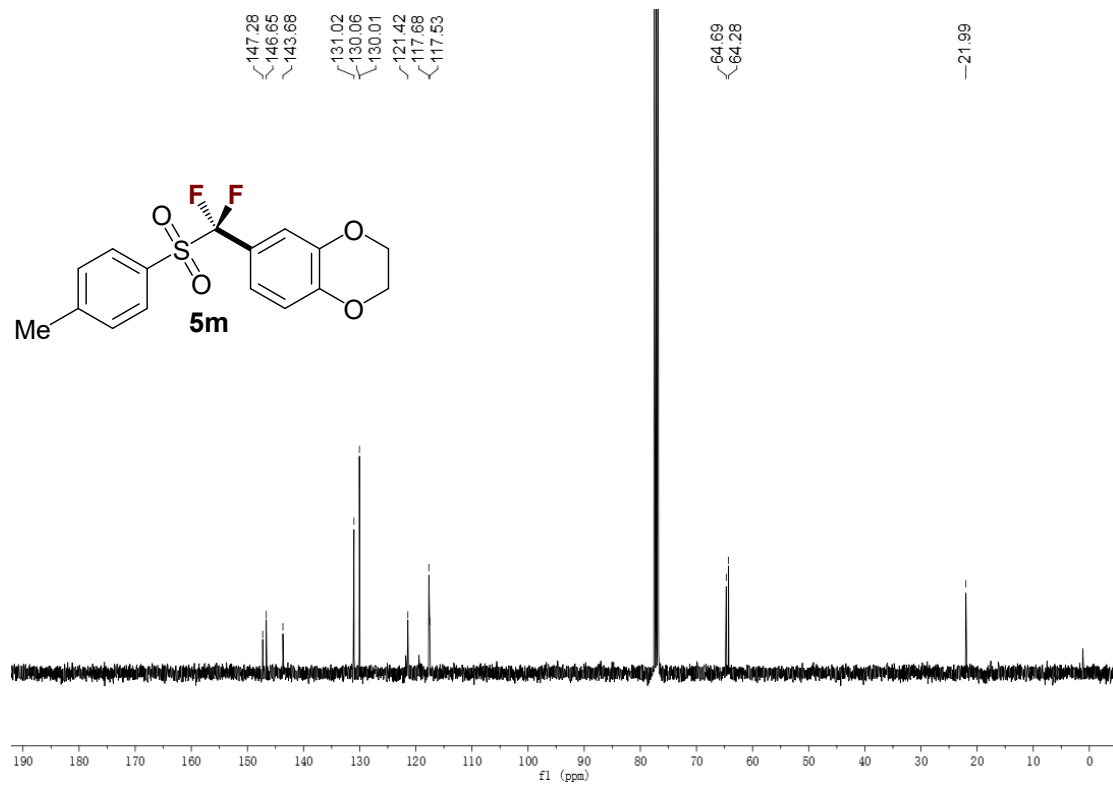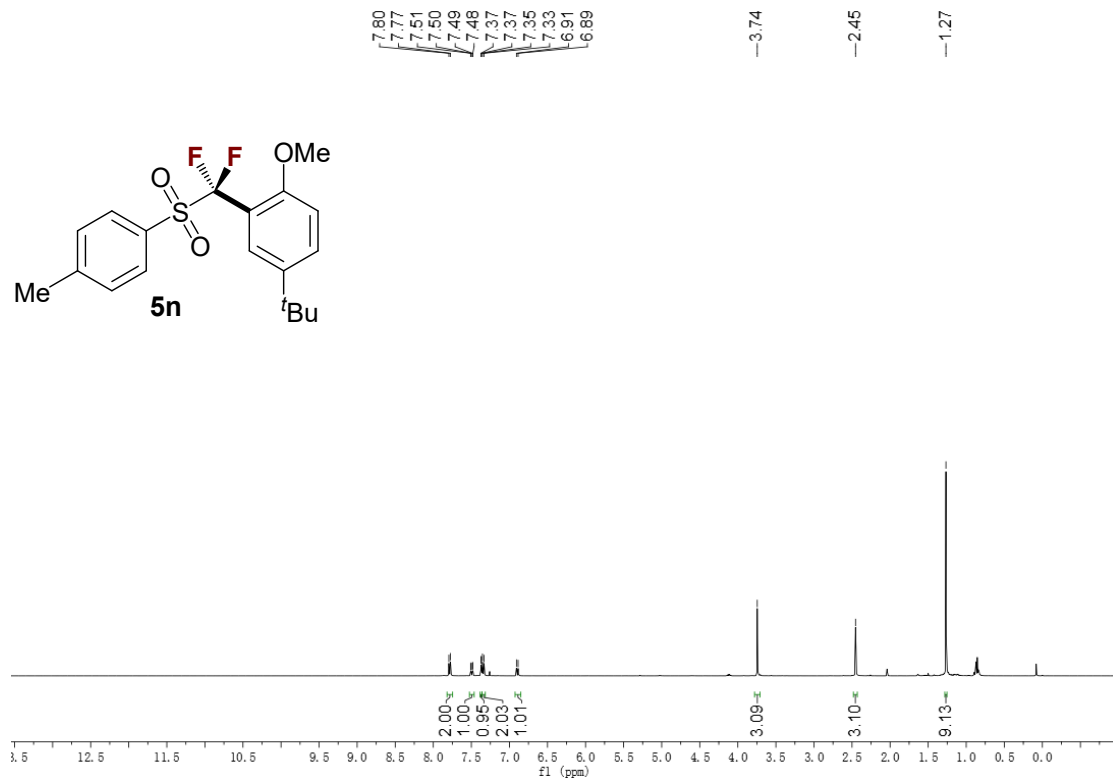

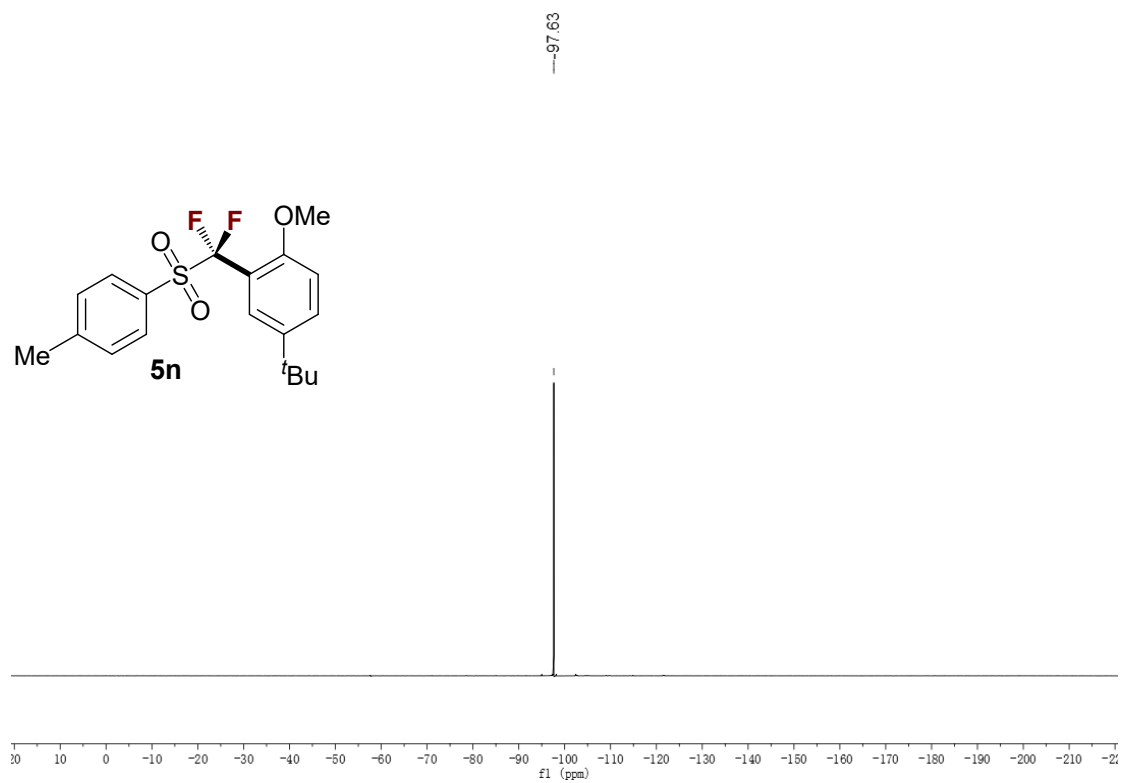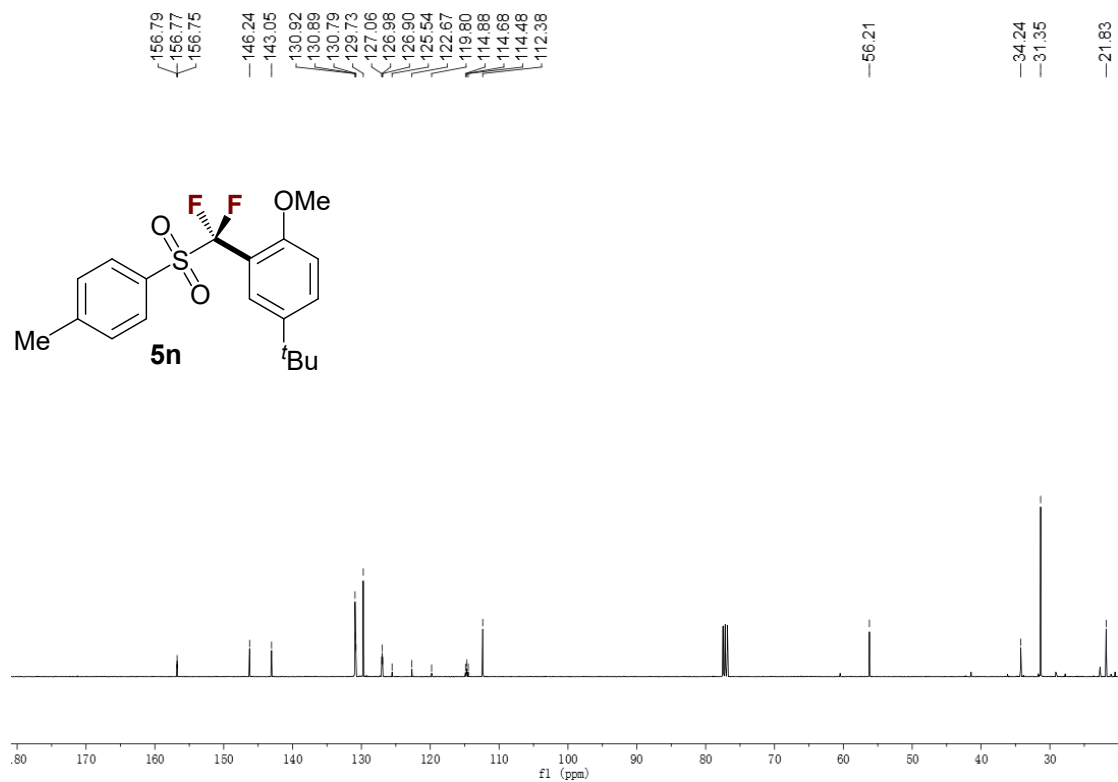



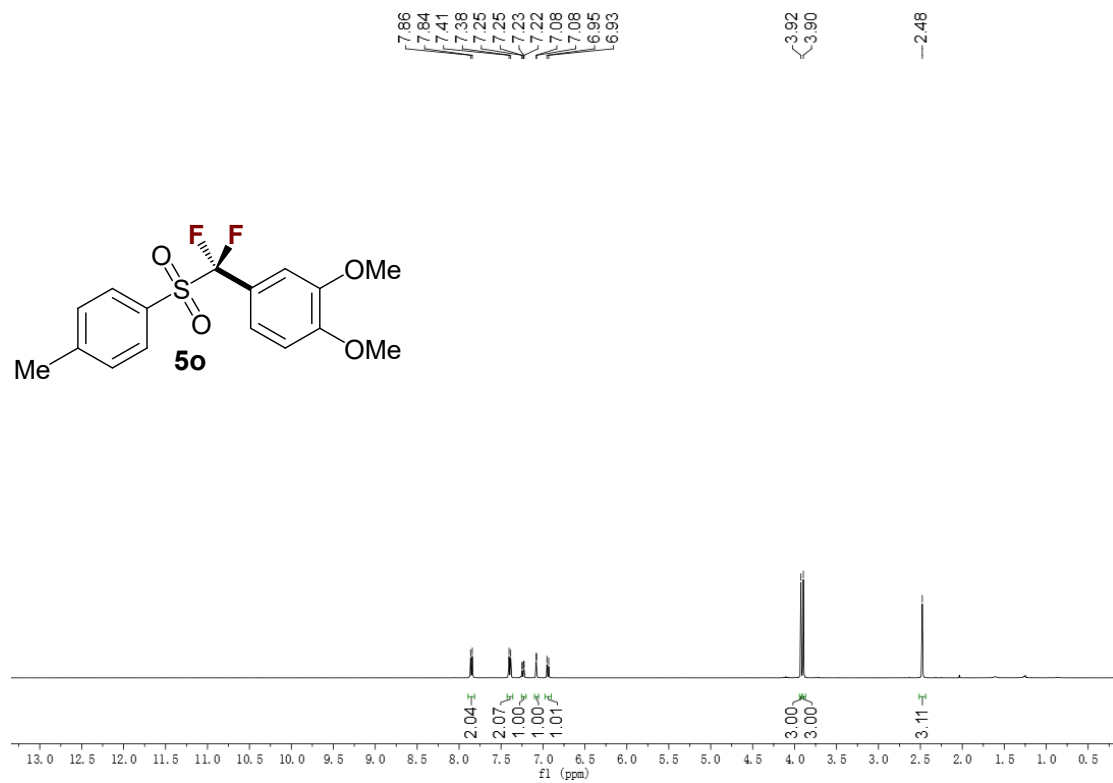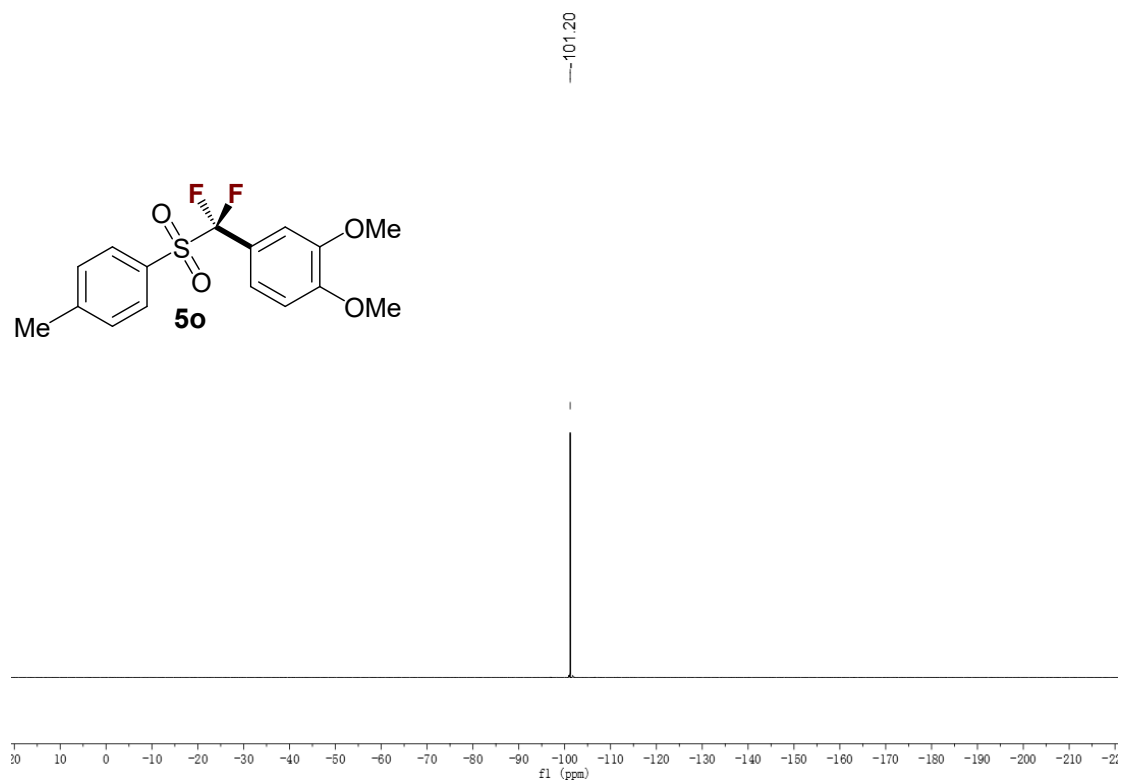

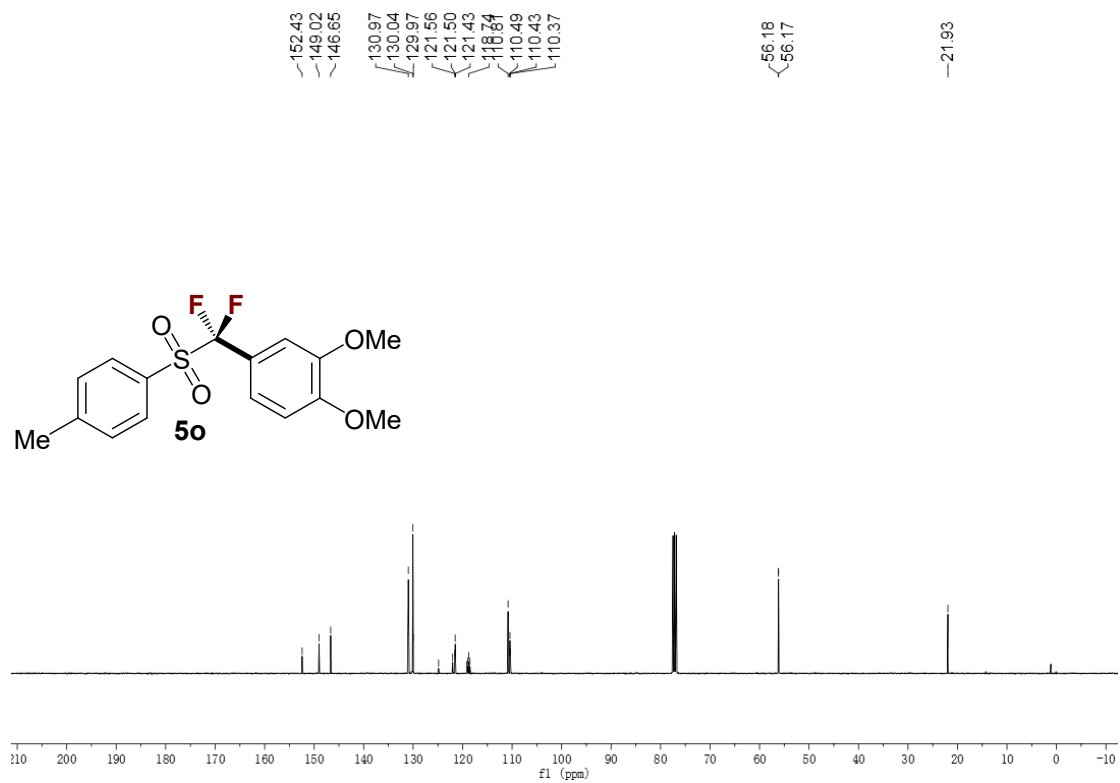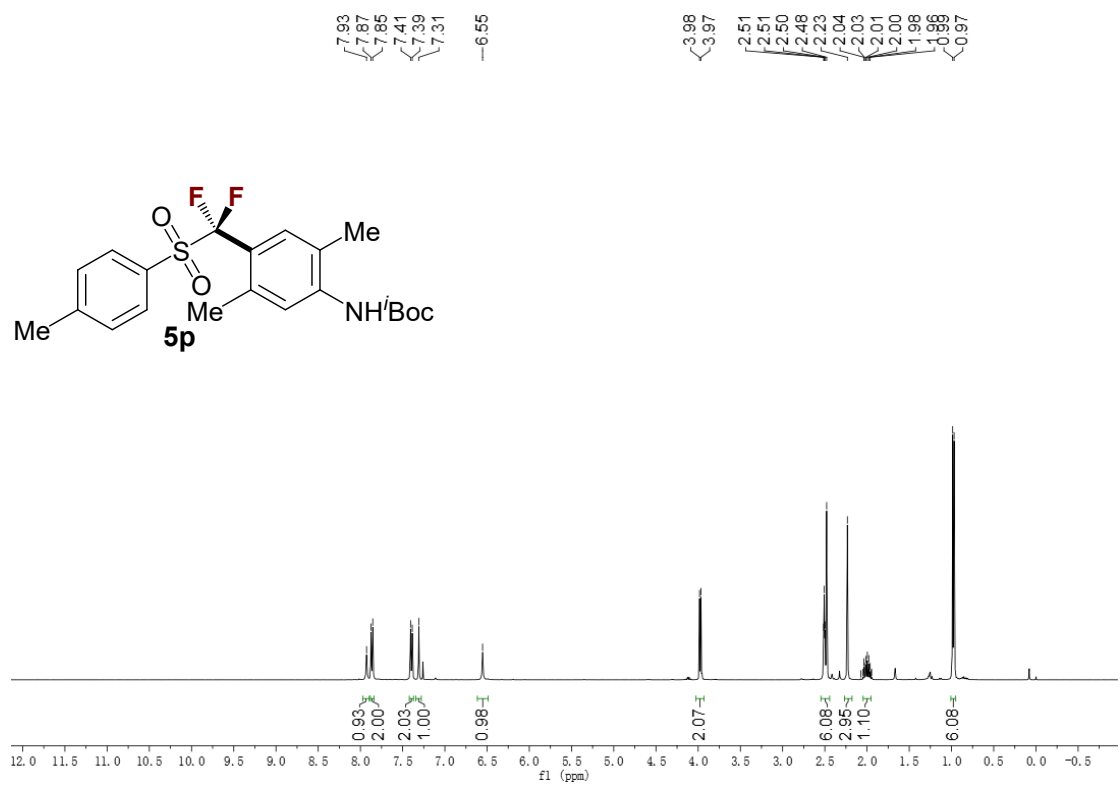

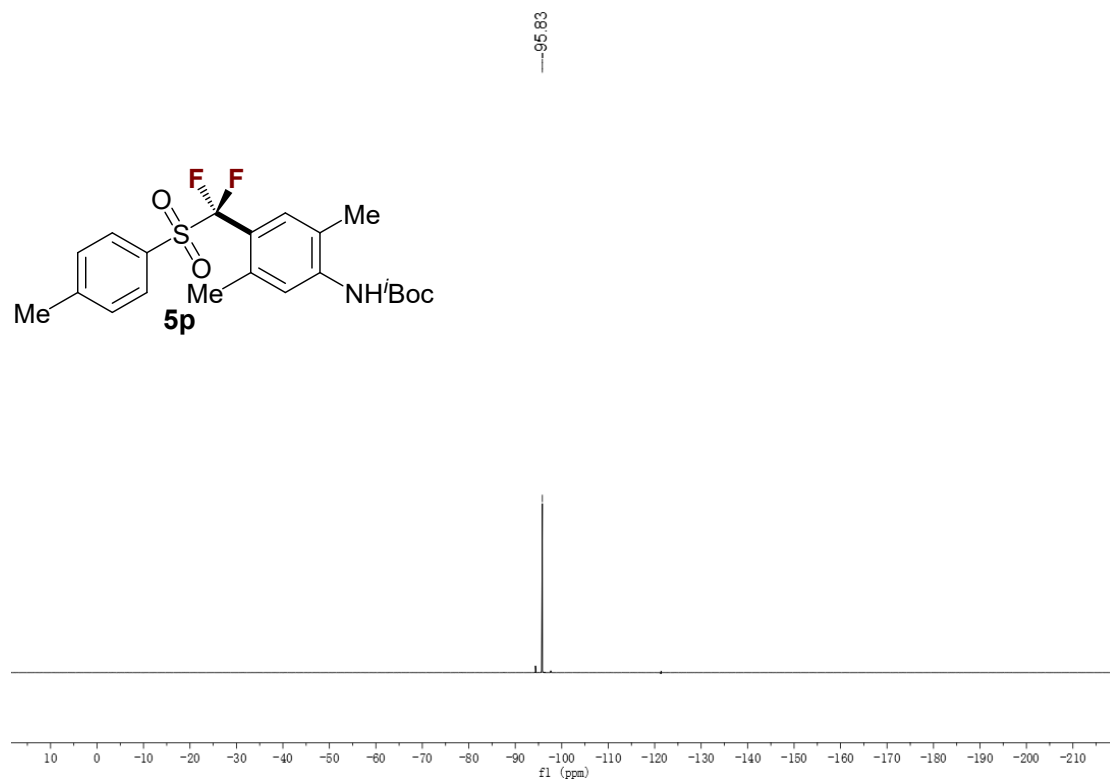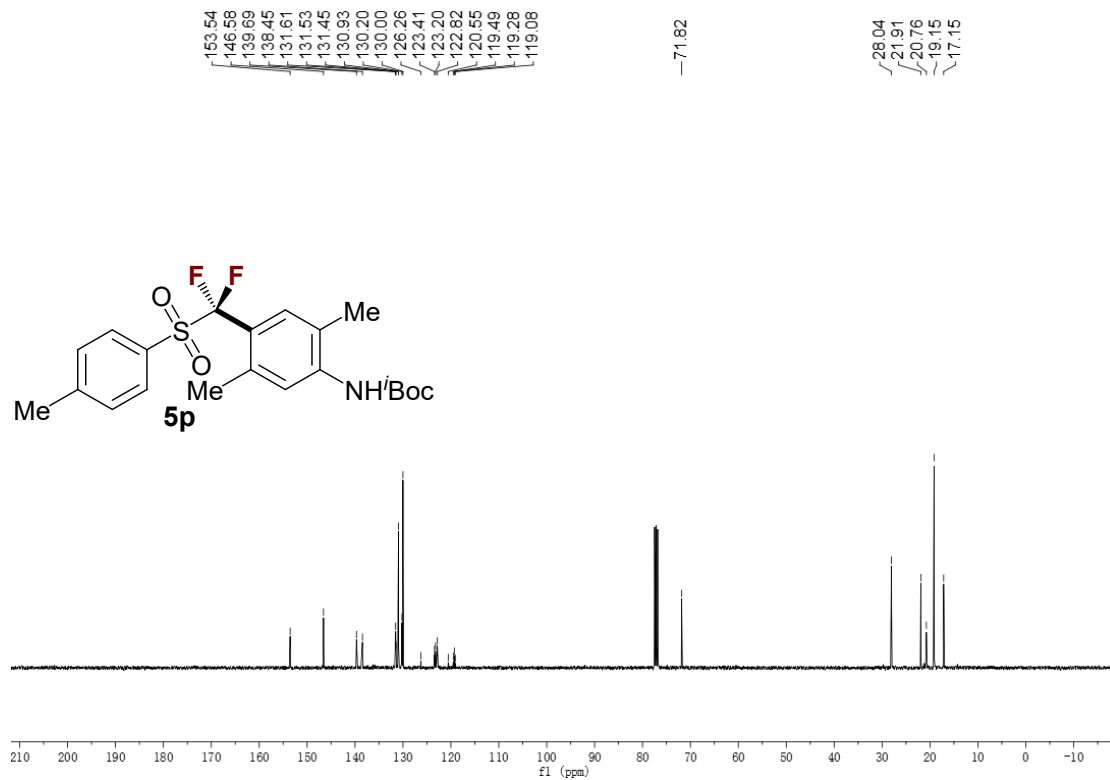

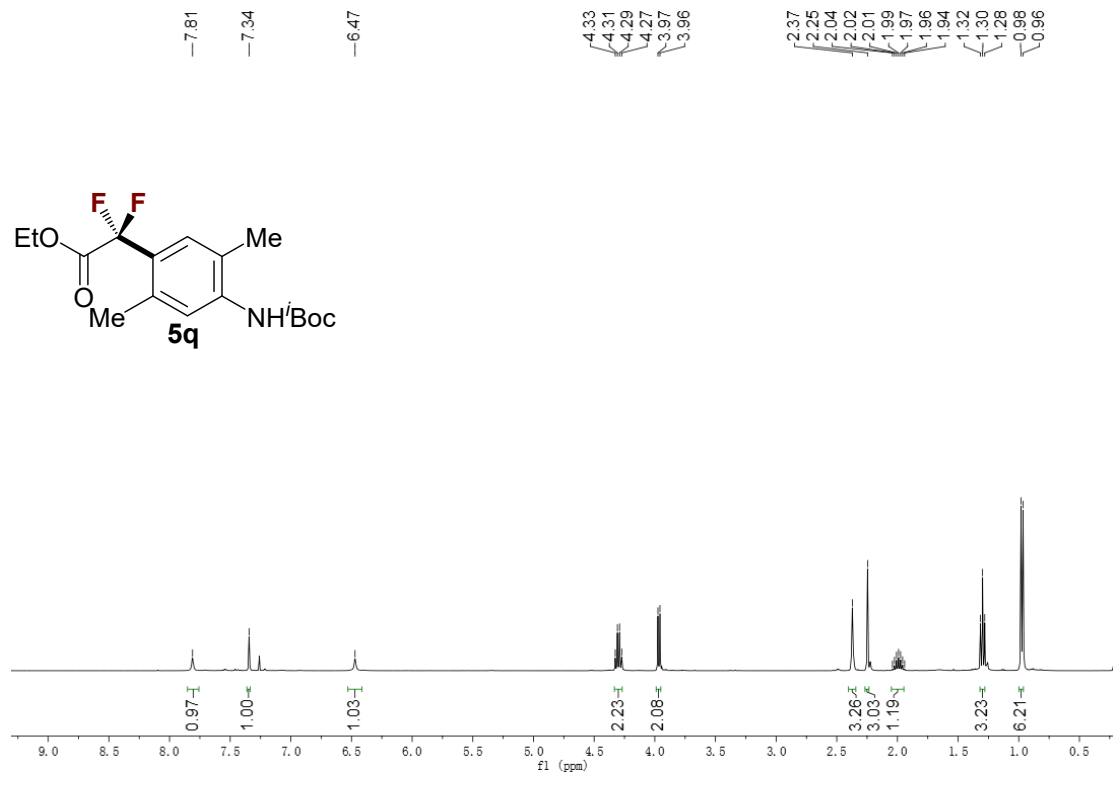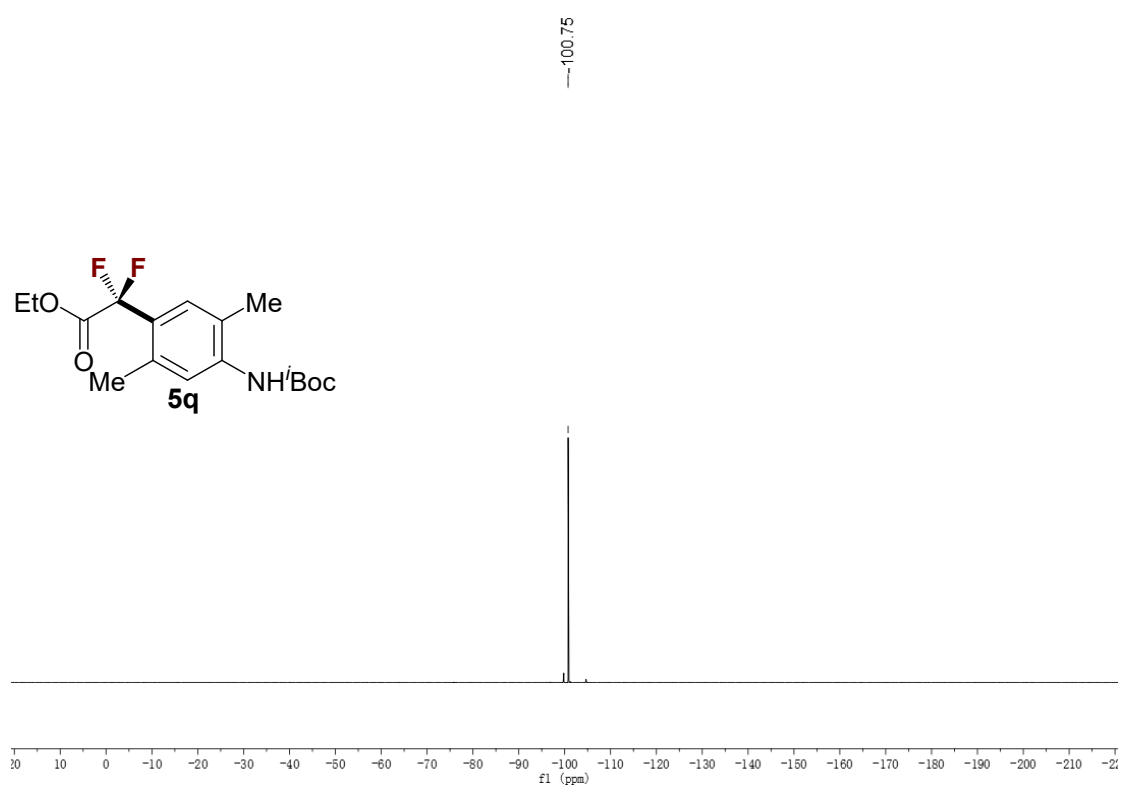

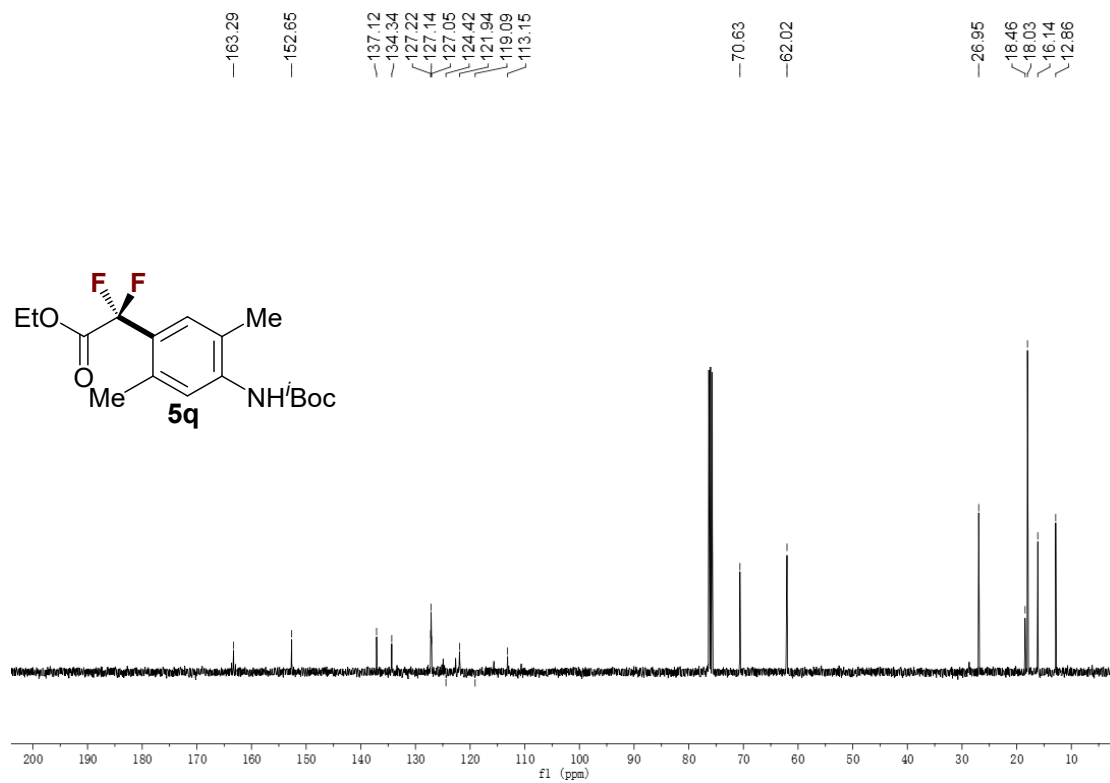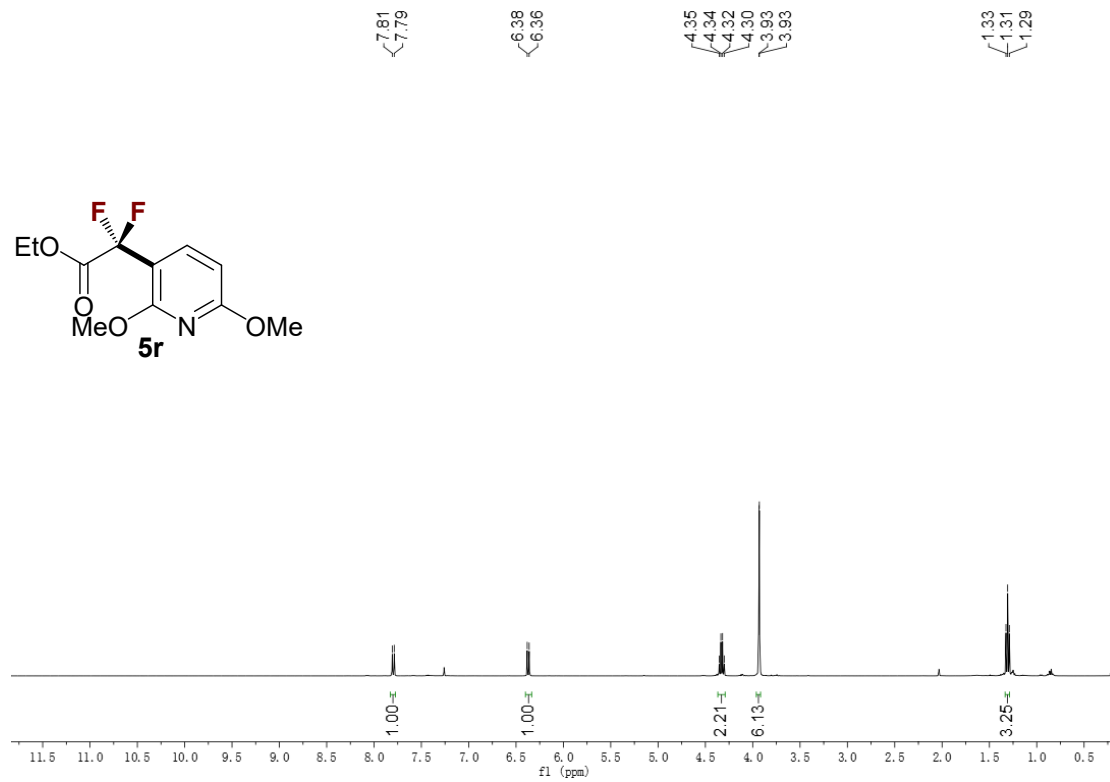

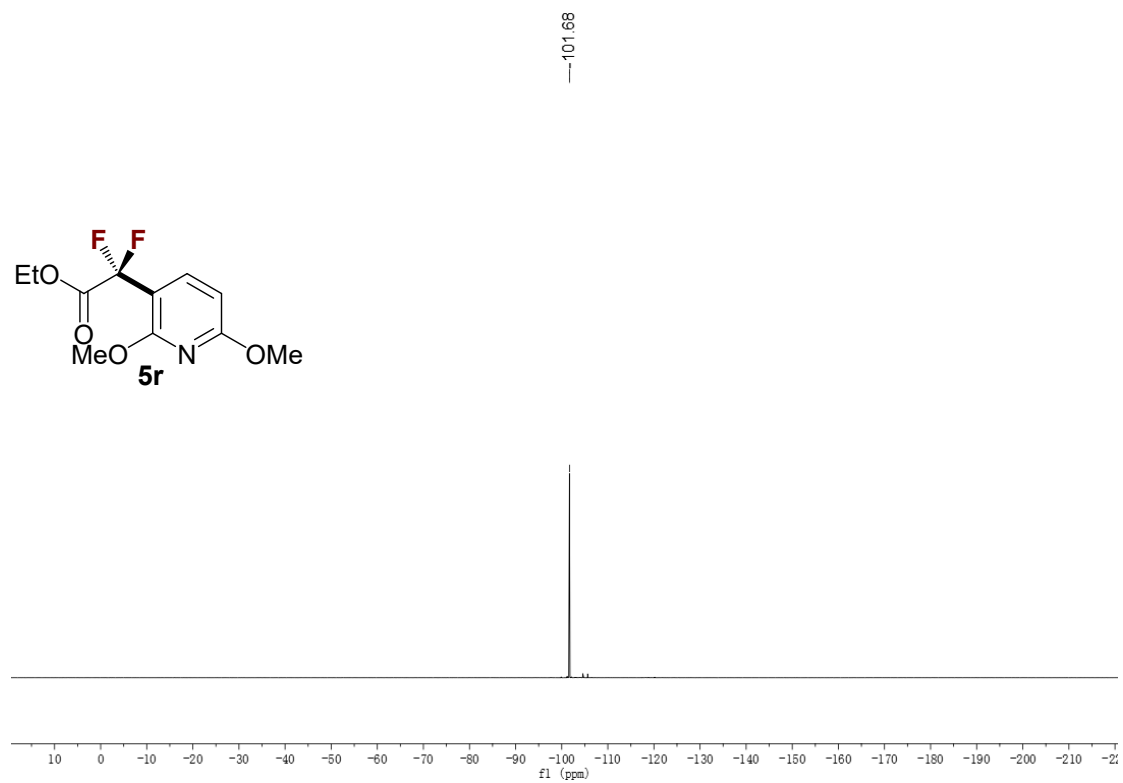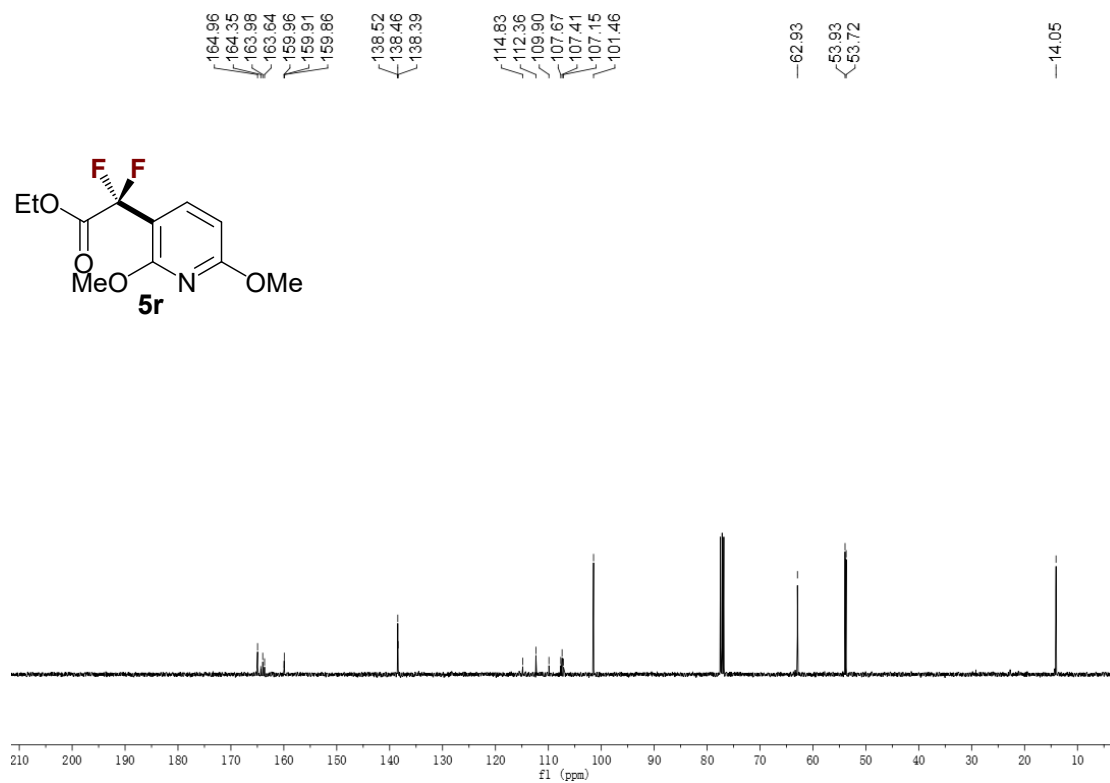

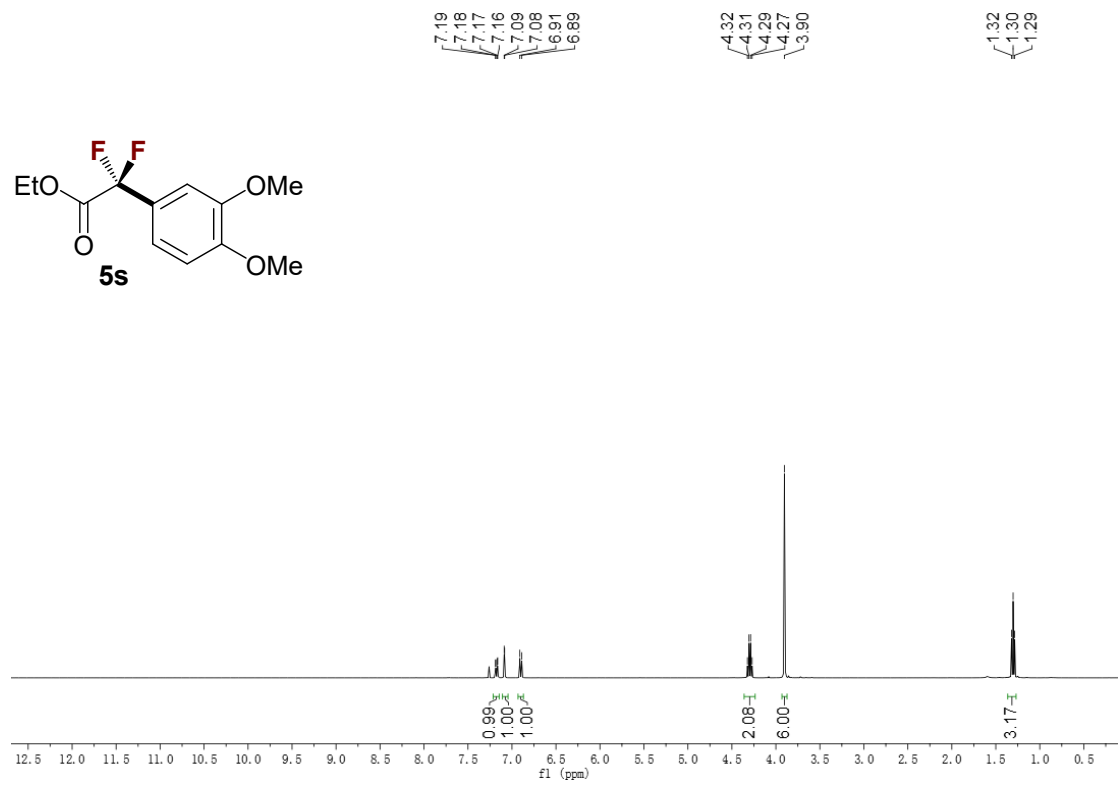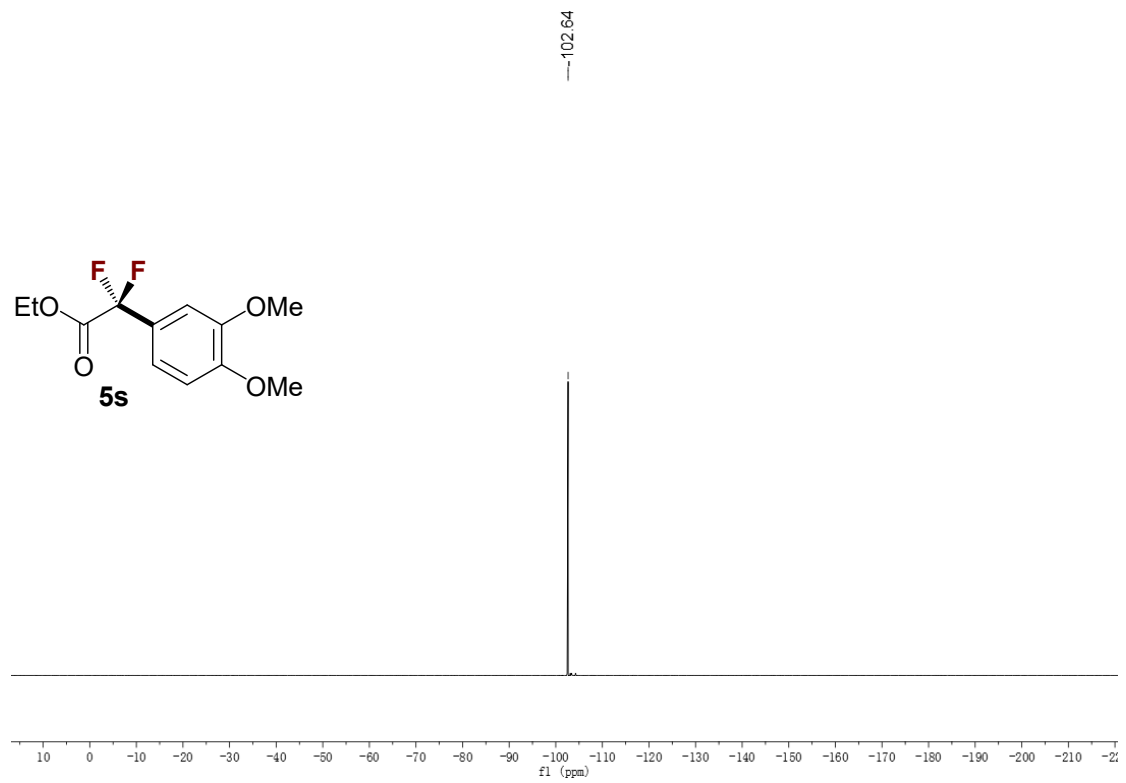

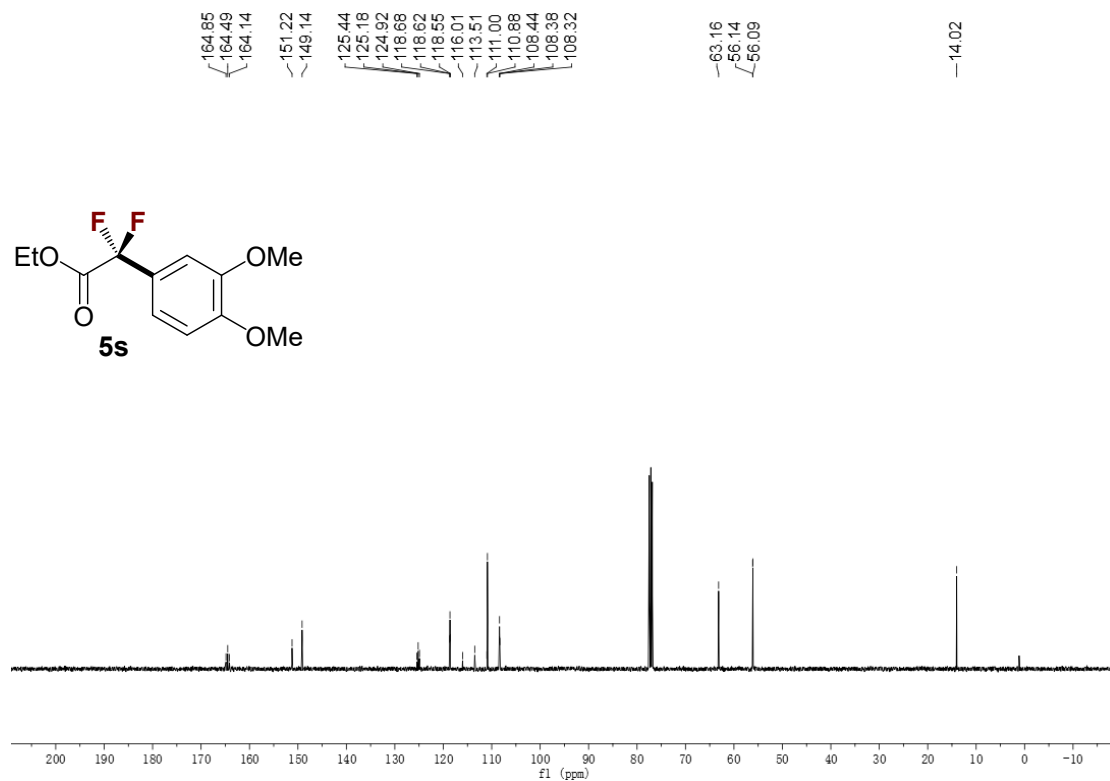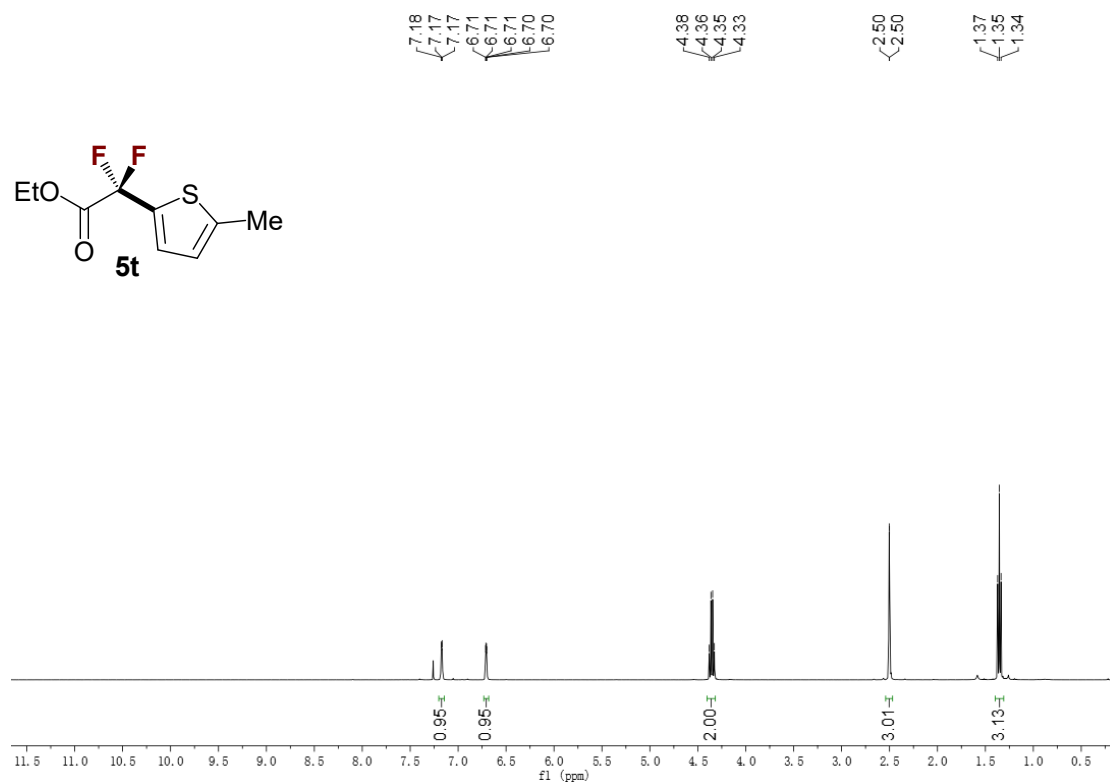



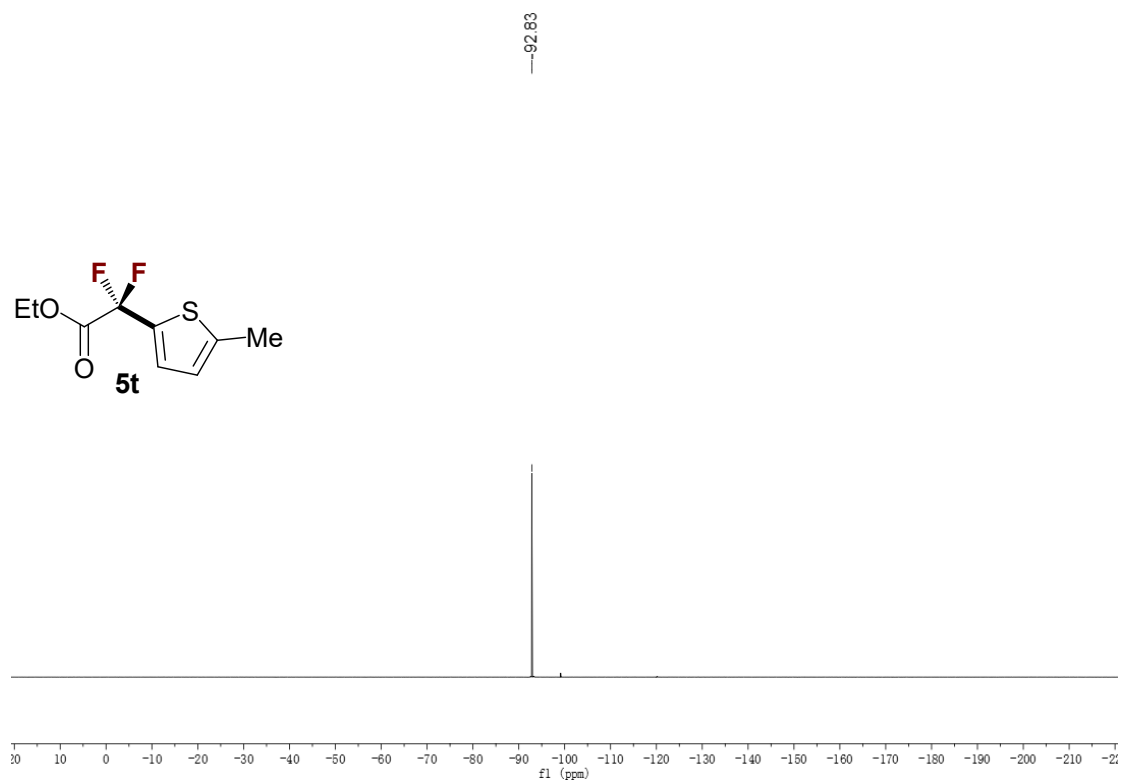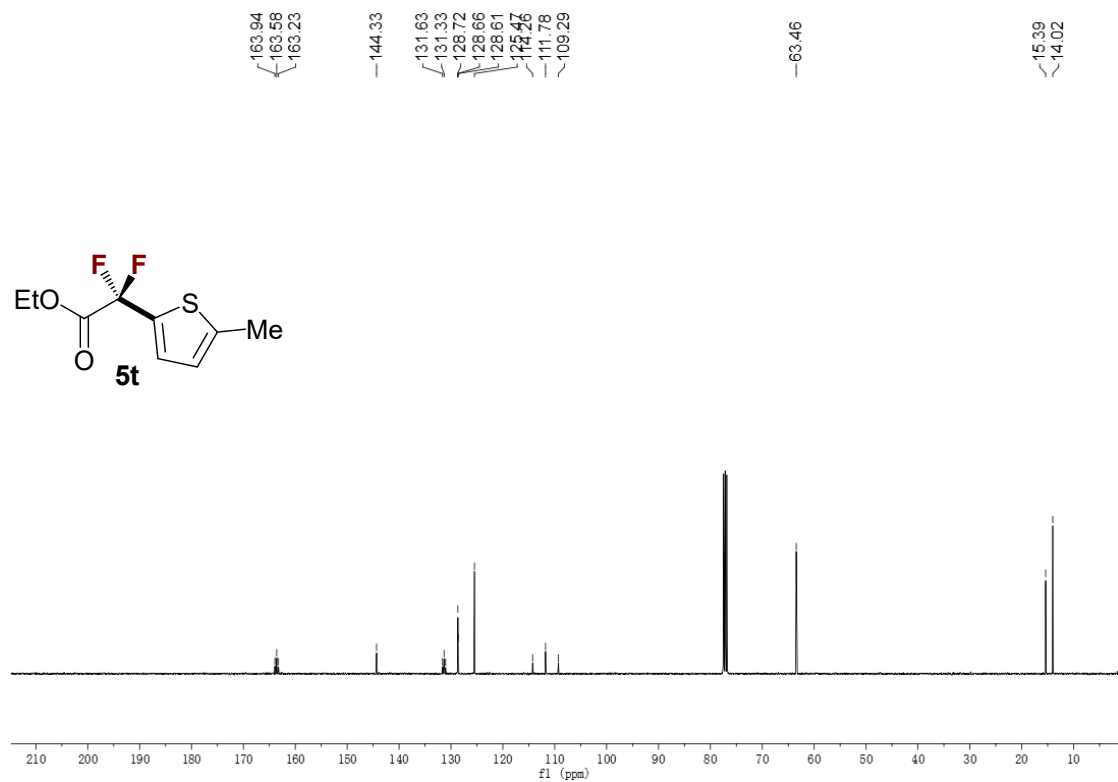

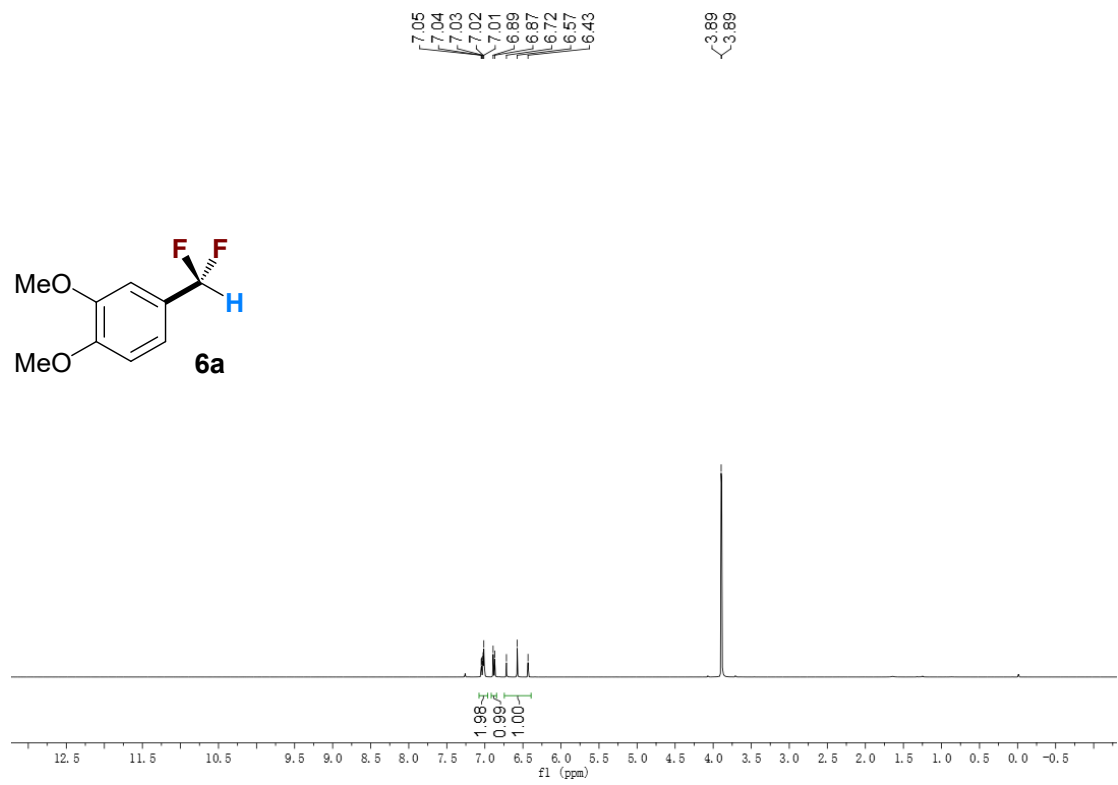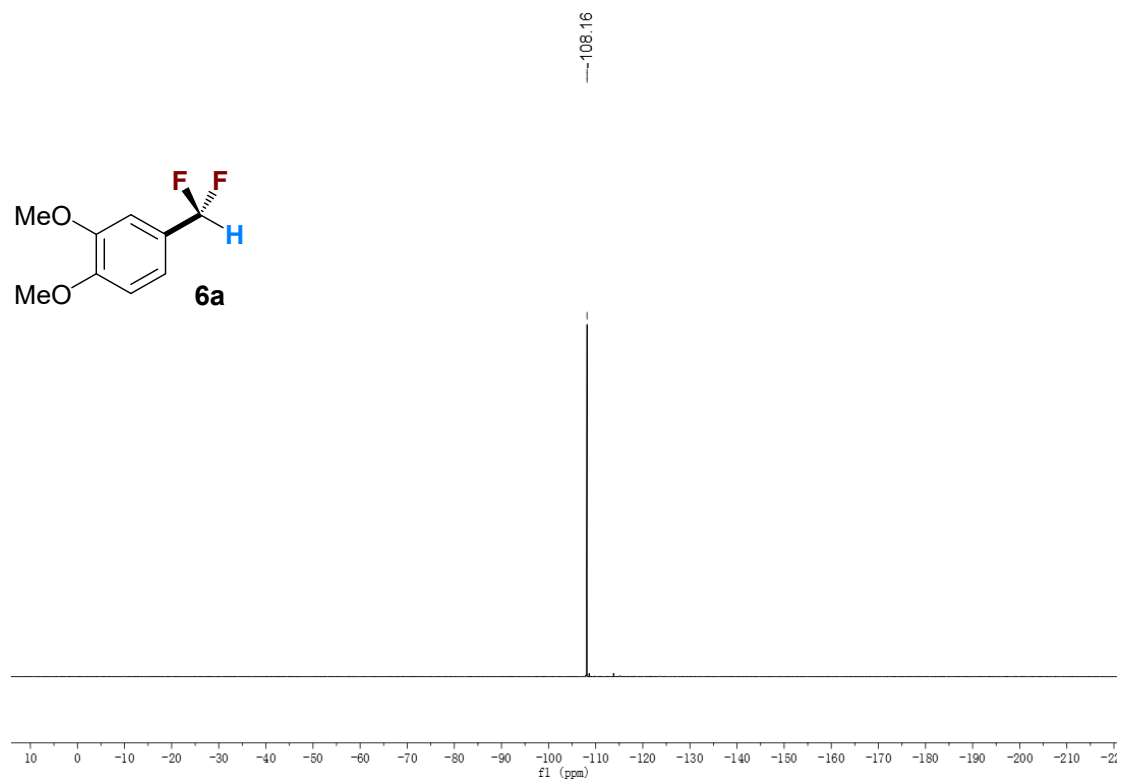

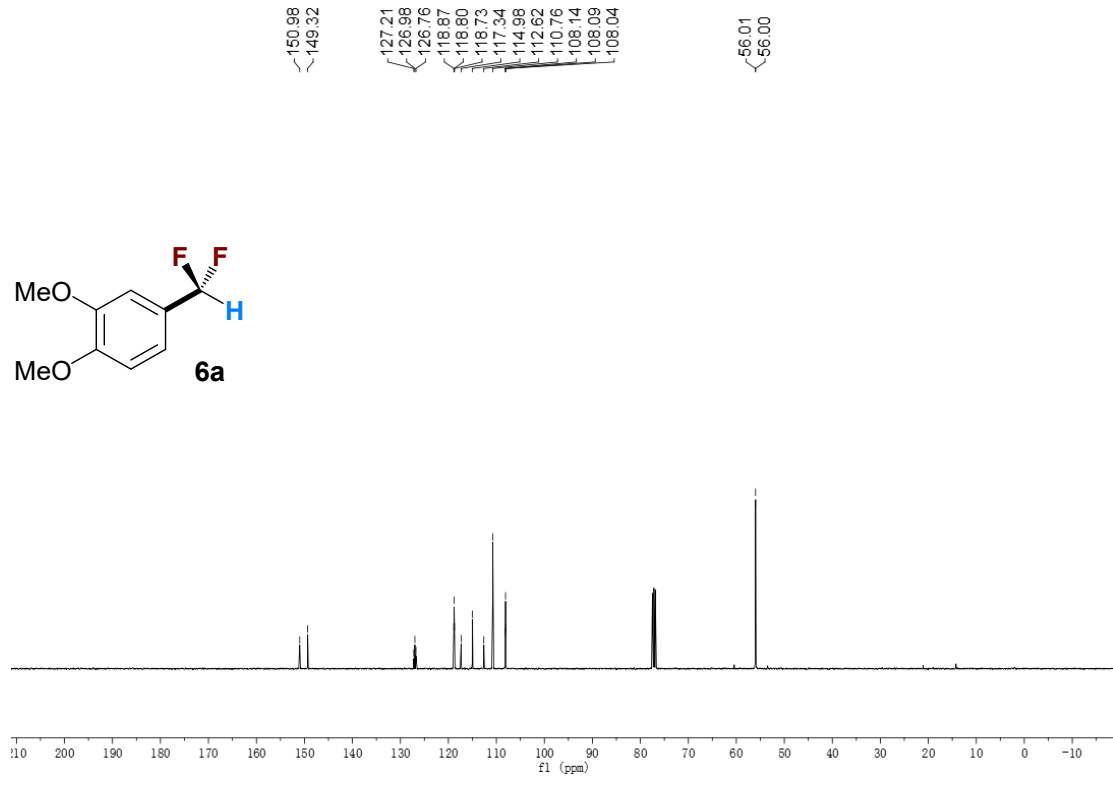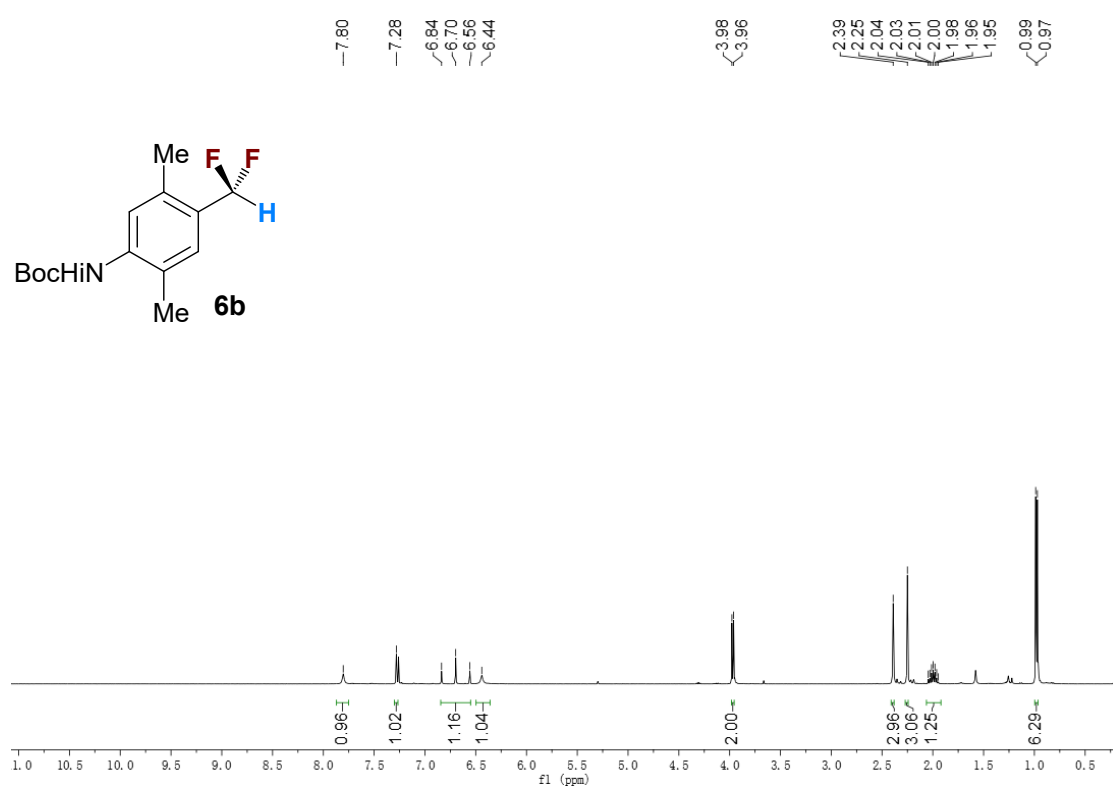

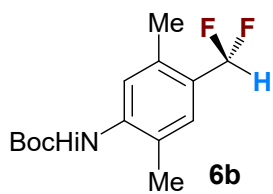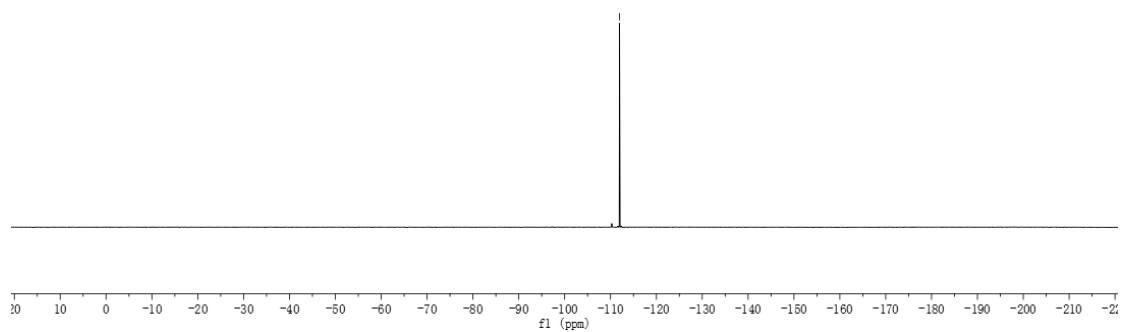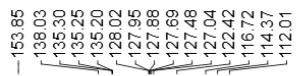

---71.78

---28.12

19.21

18.41

17.28

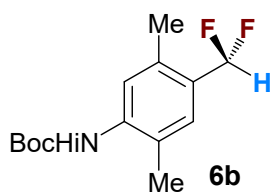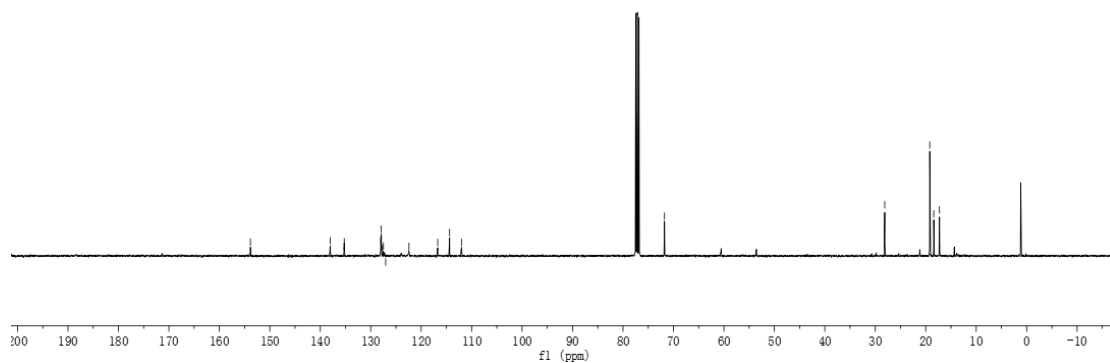

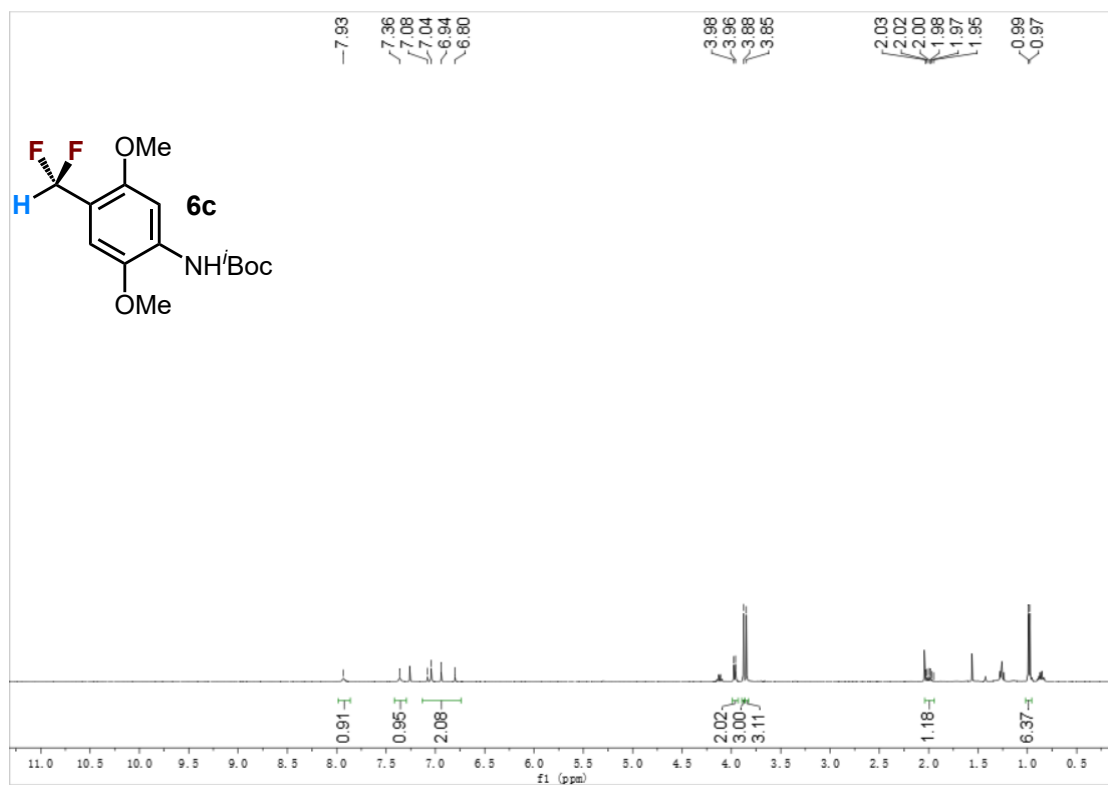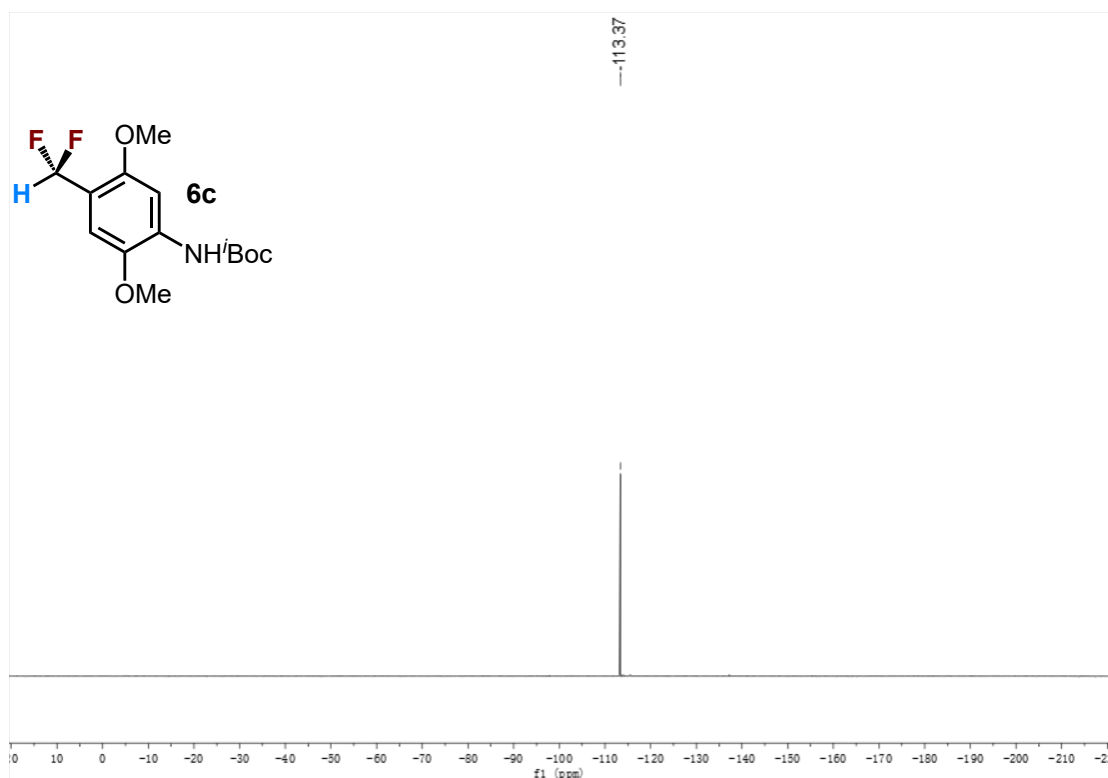

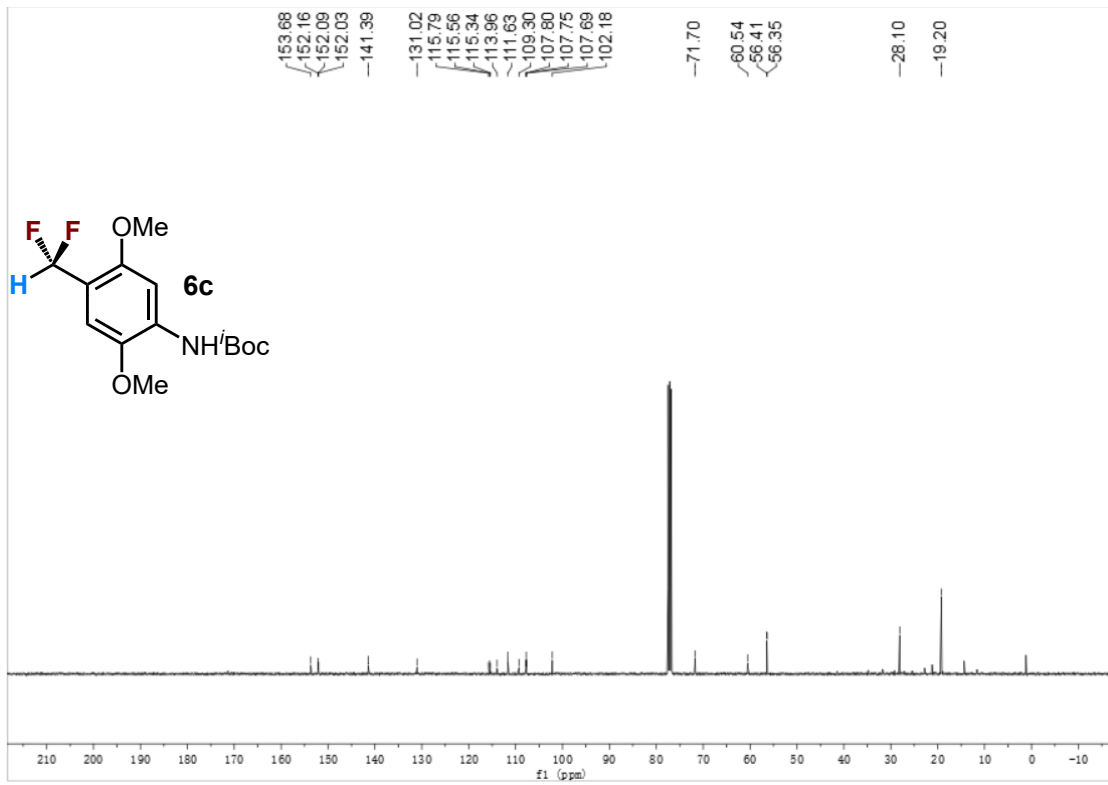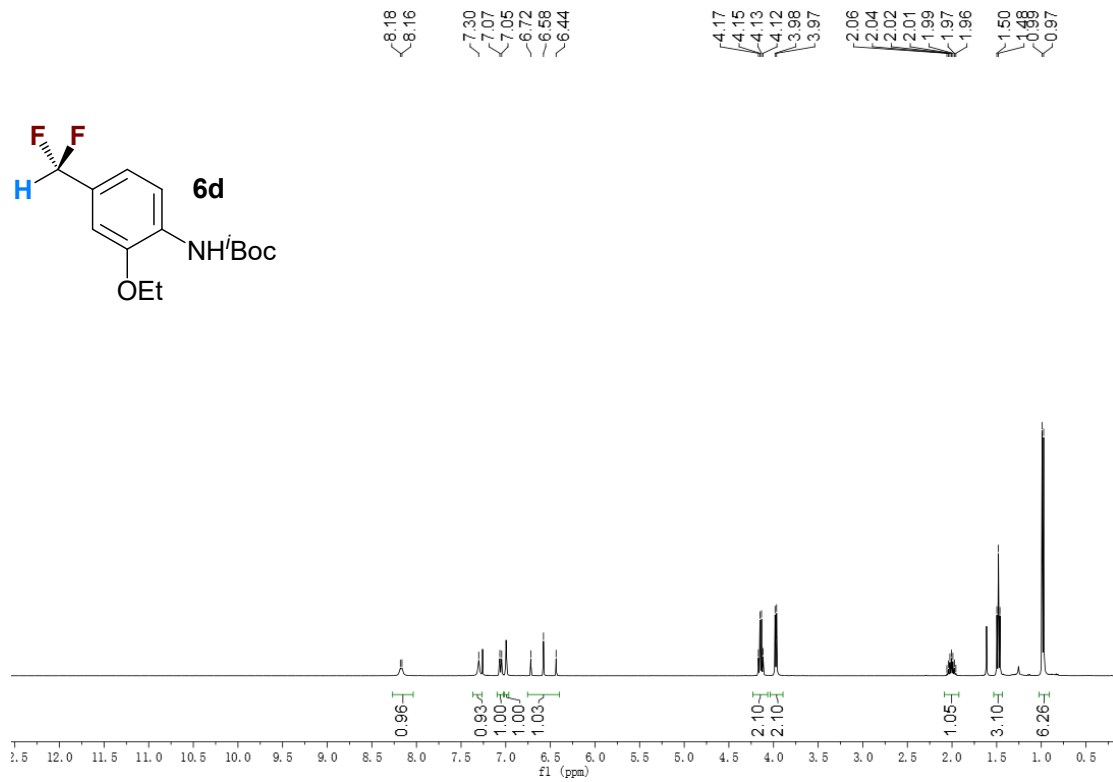

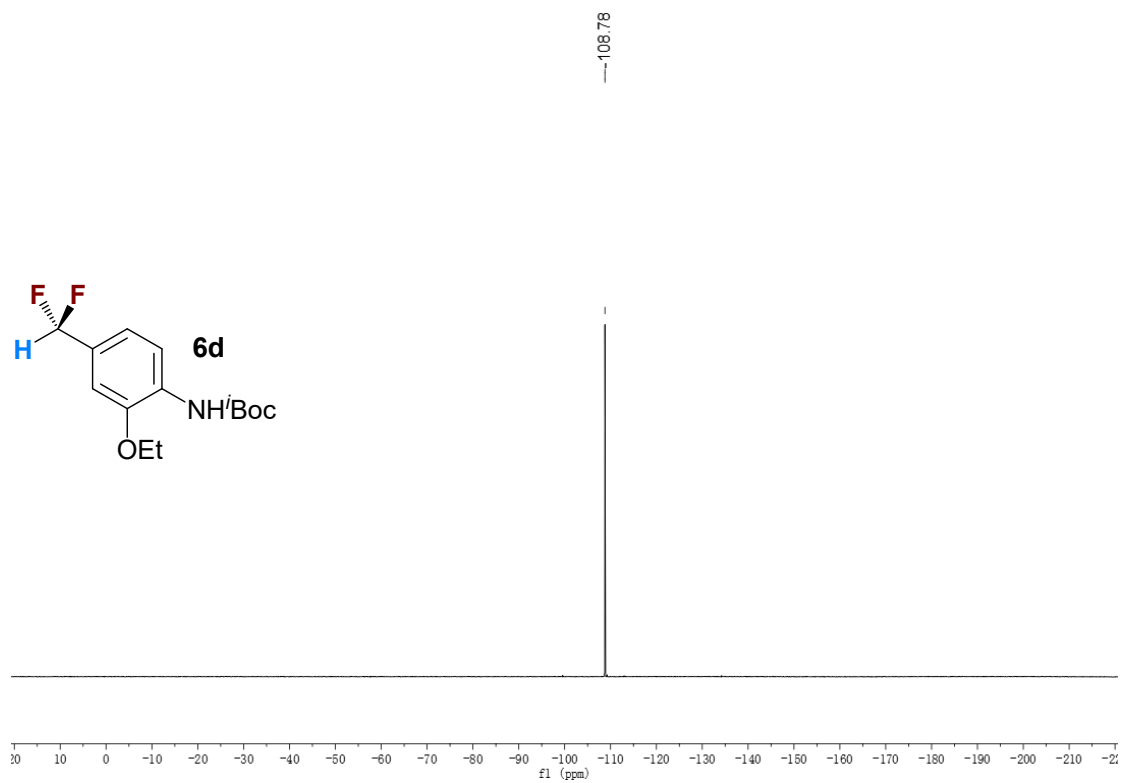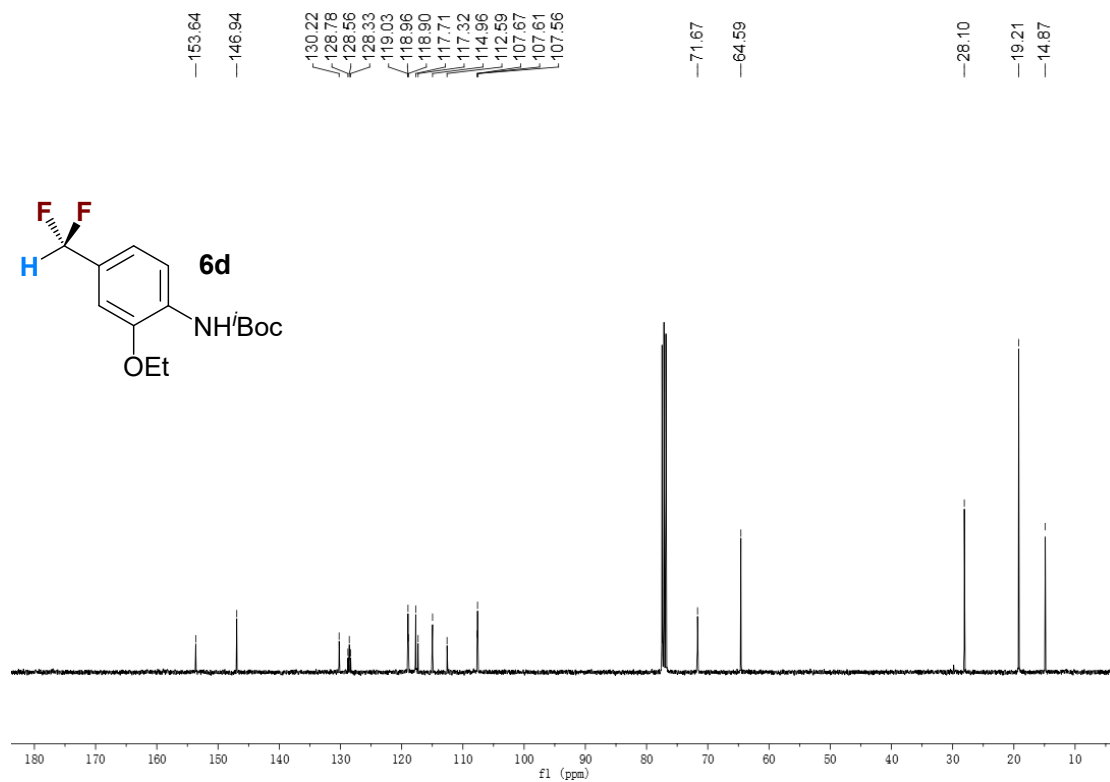

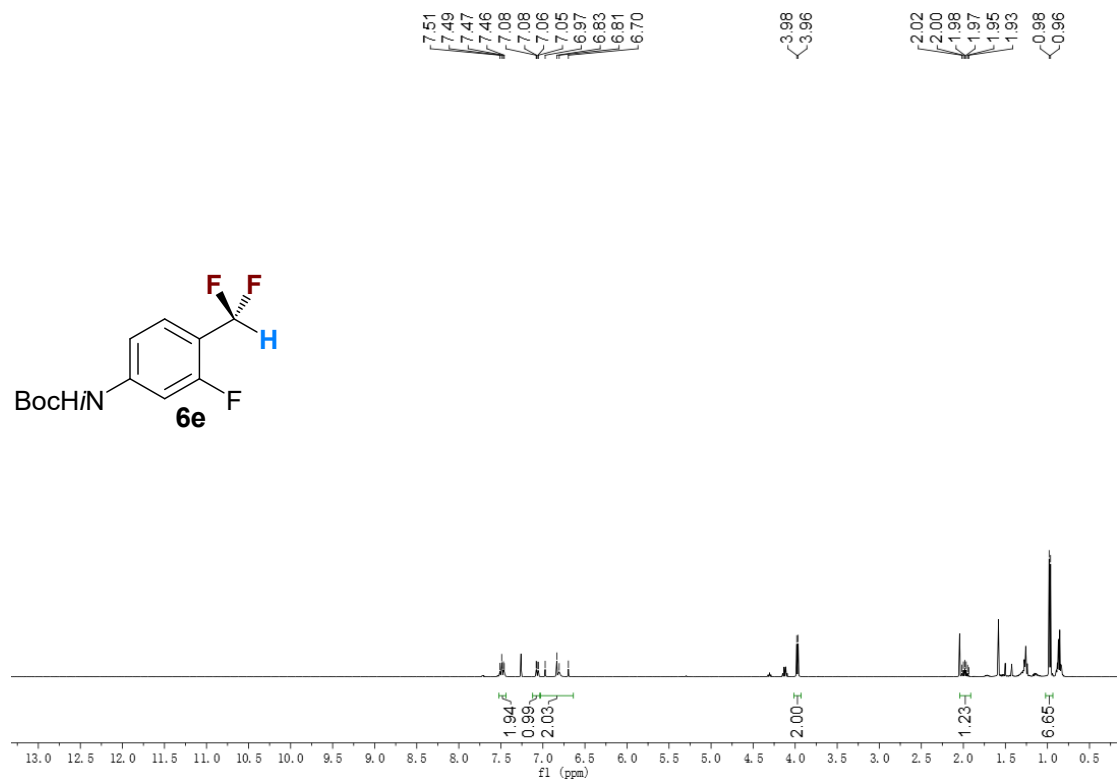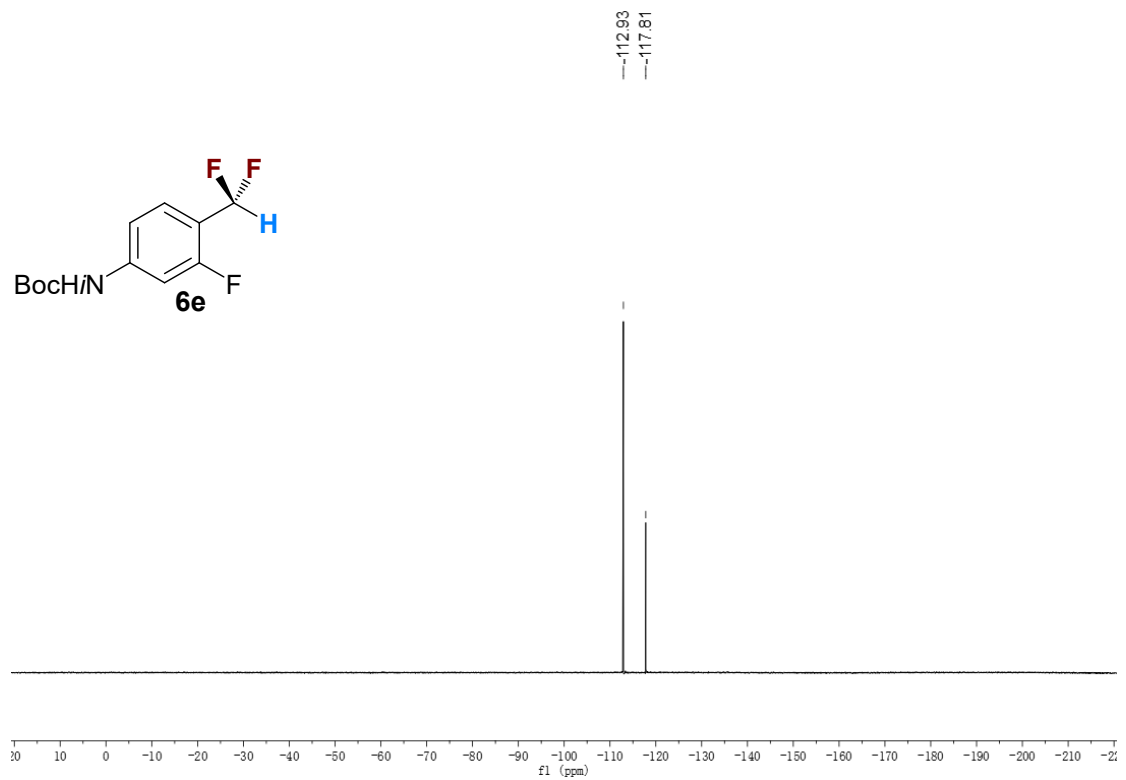



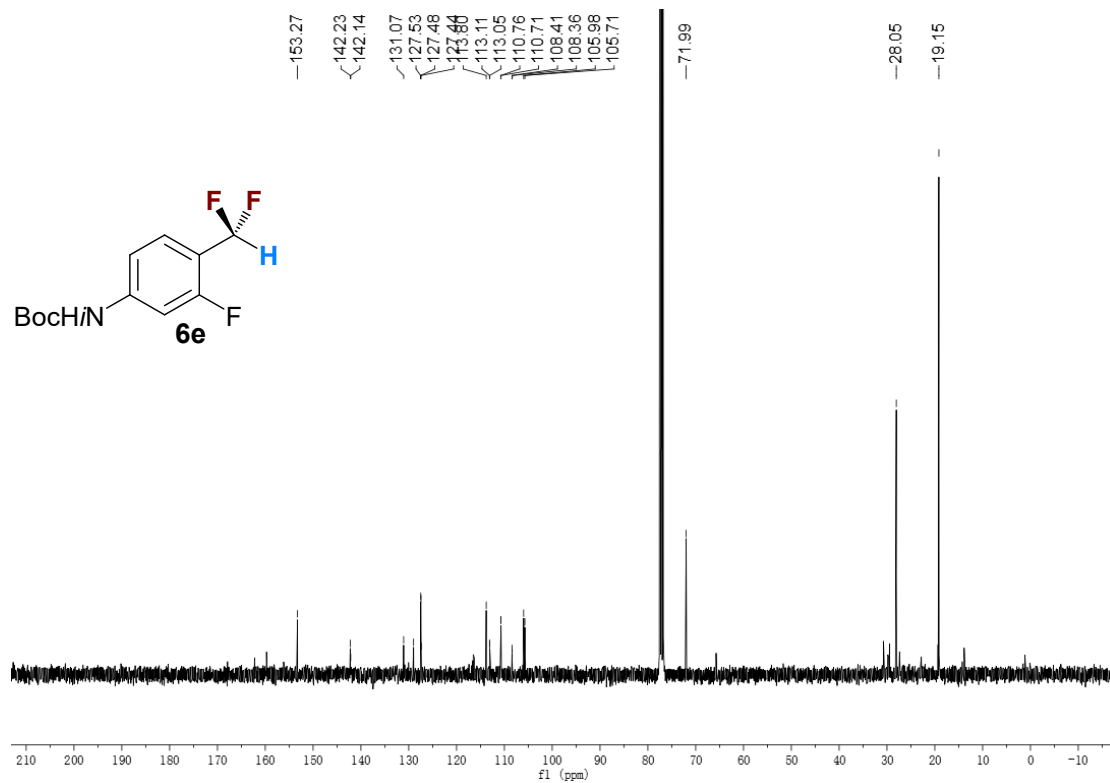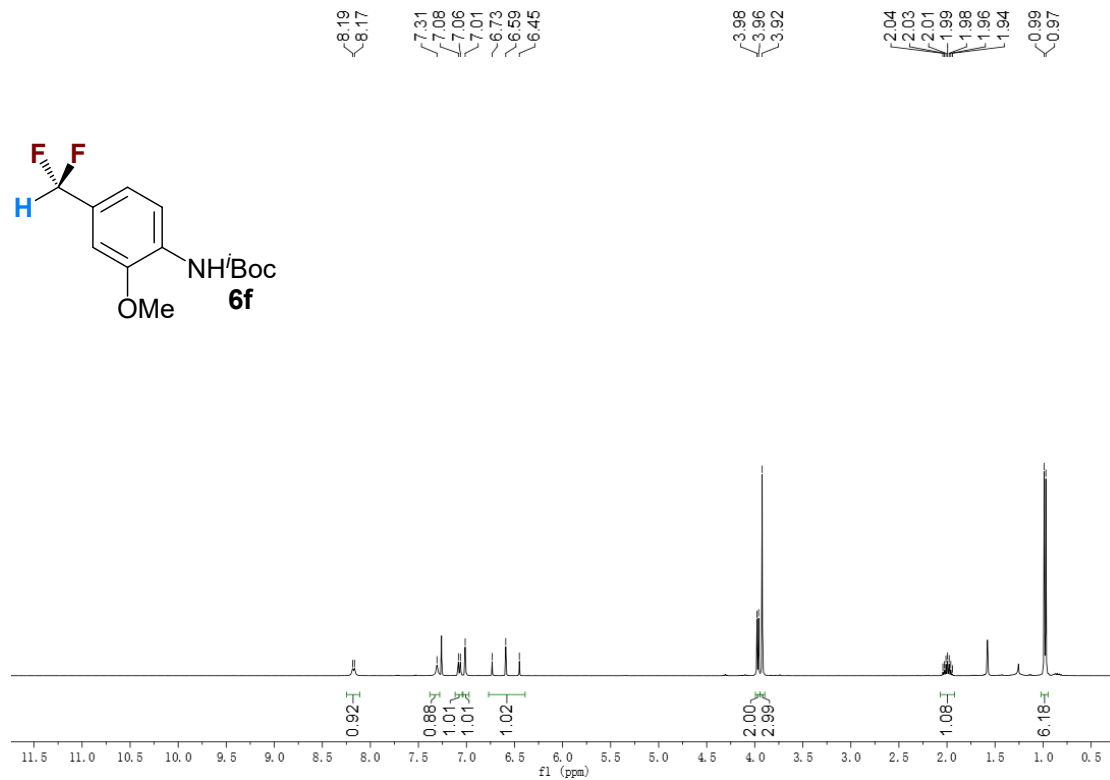

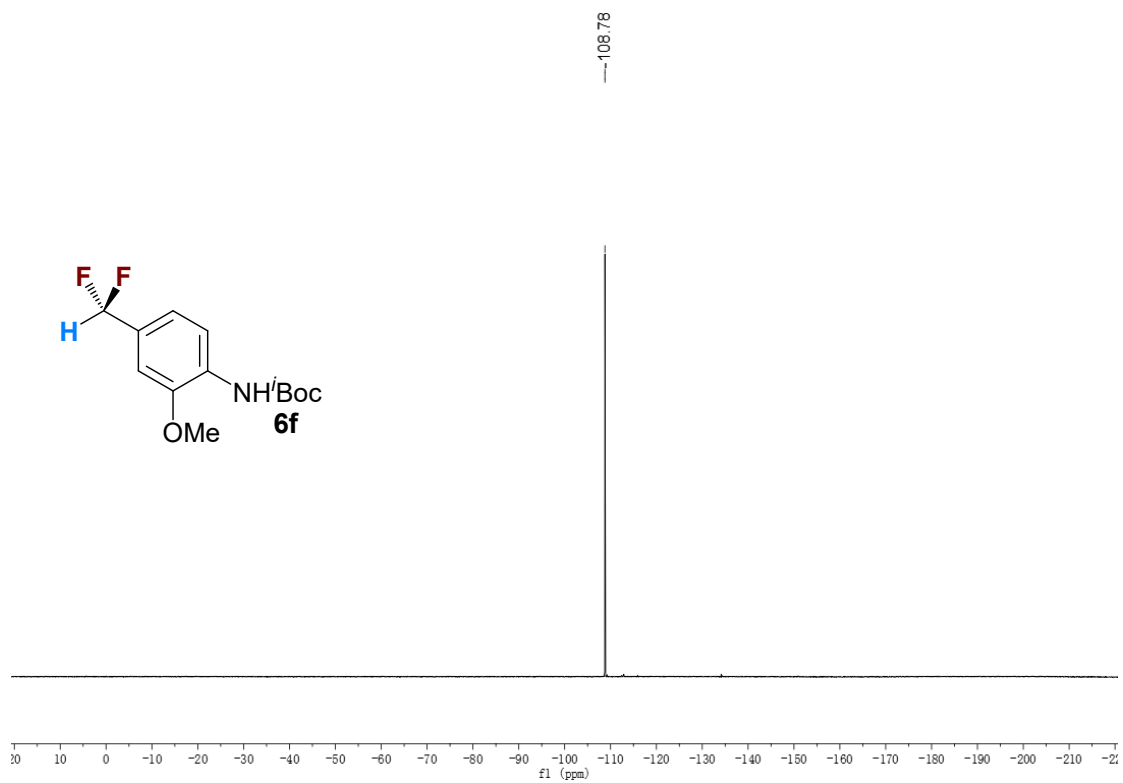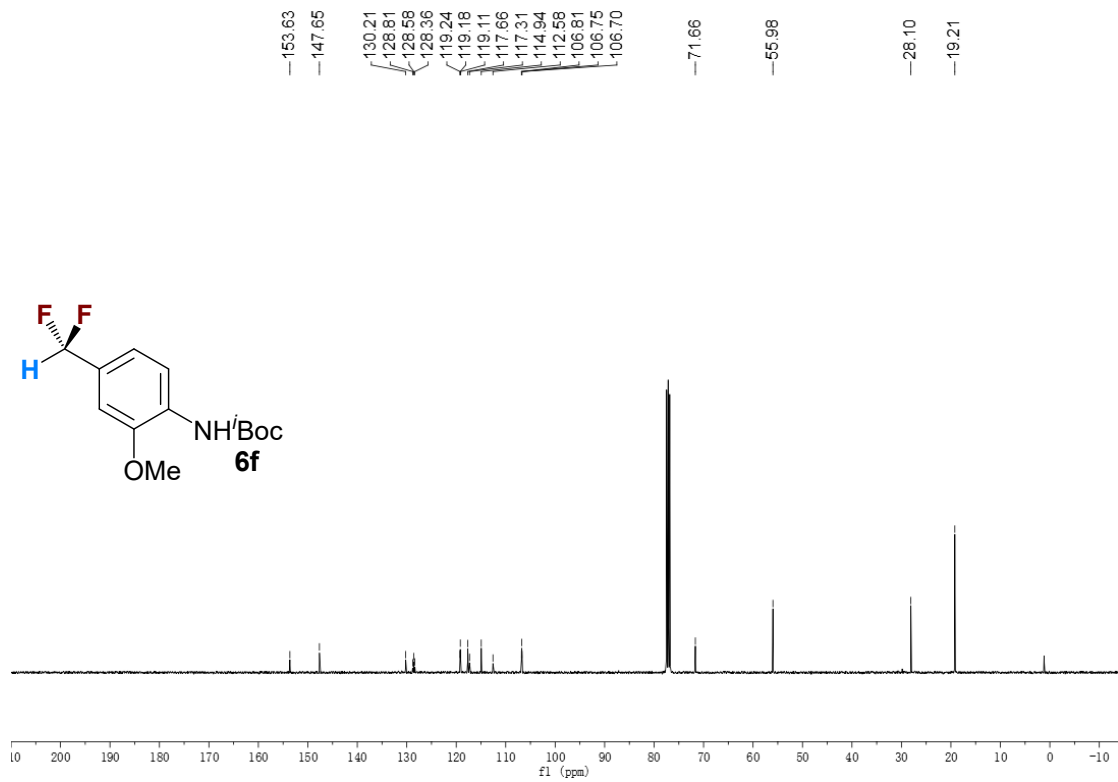

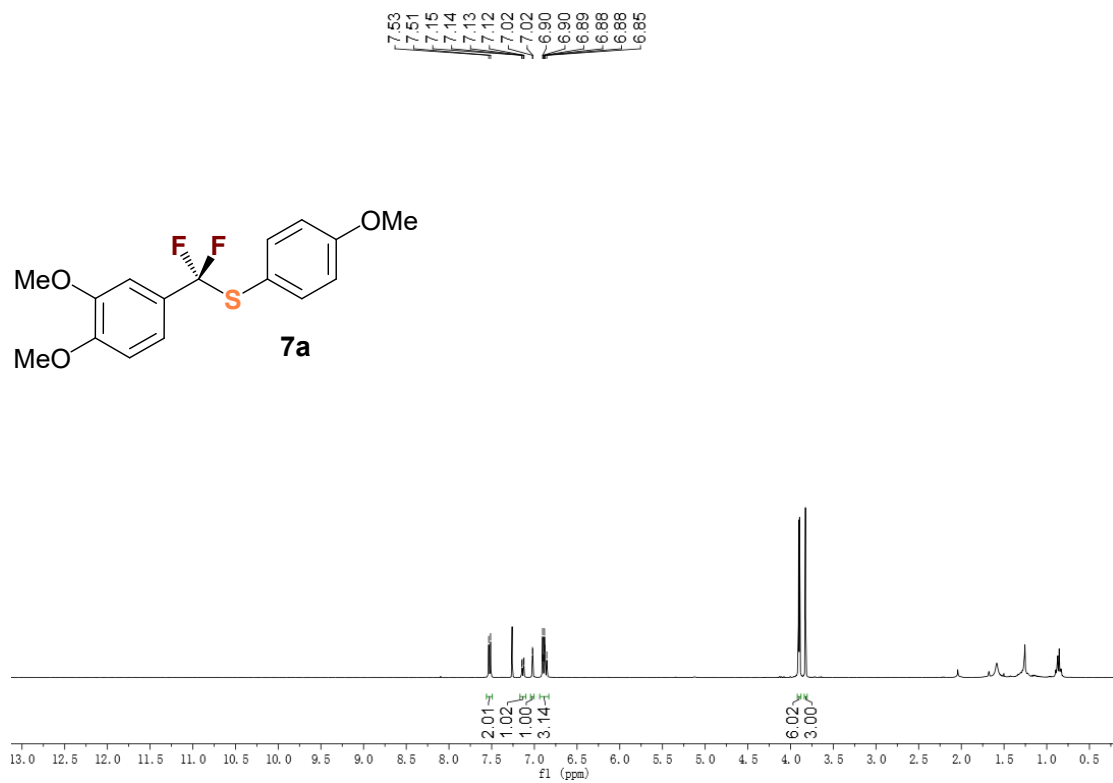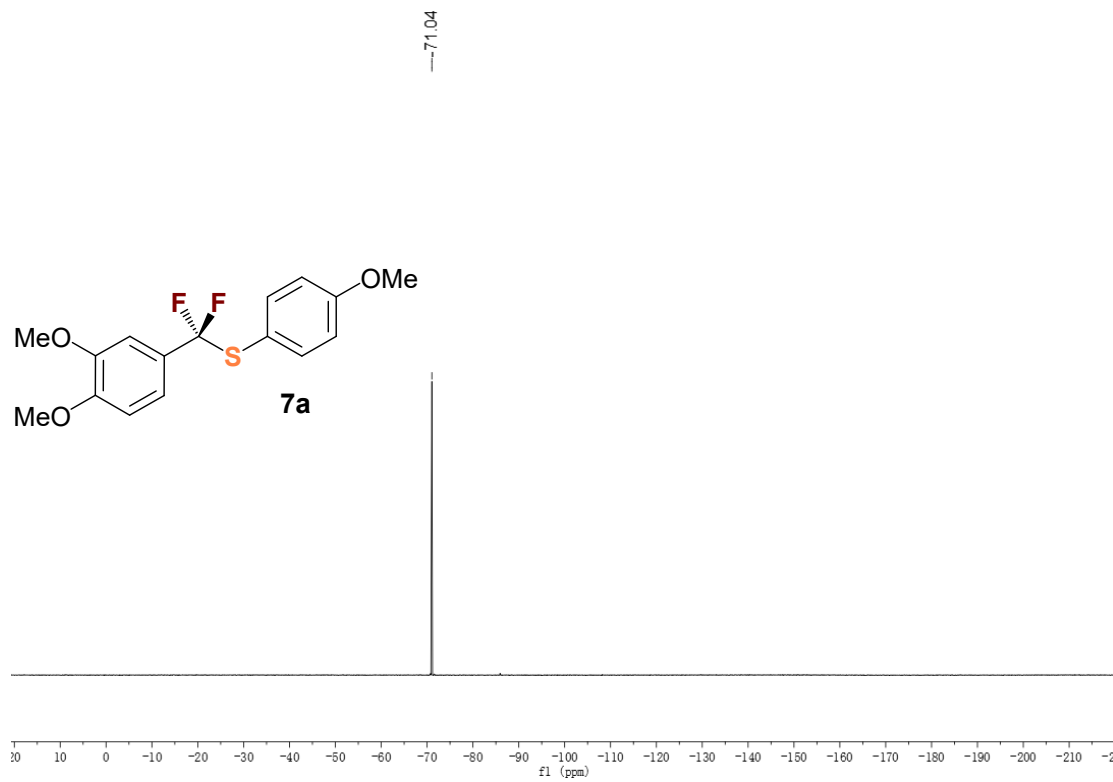

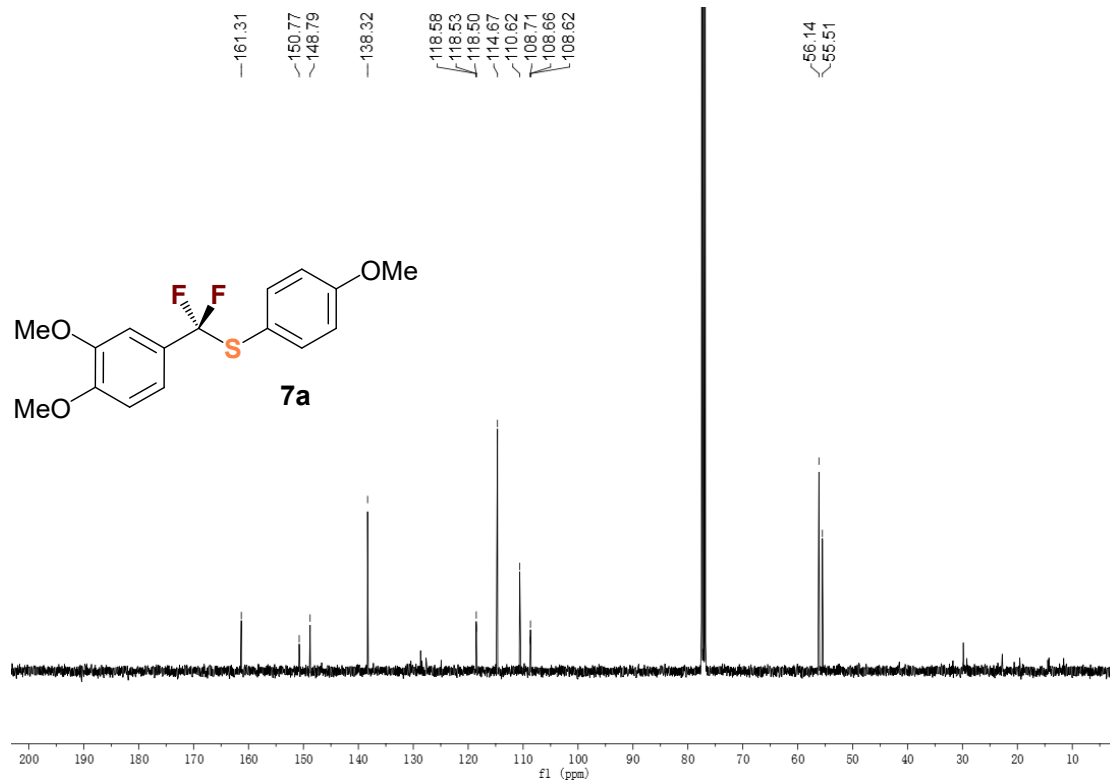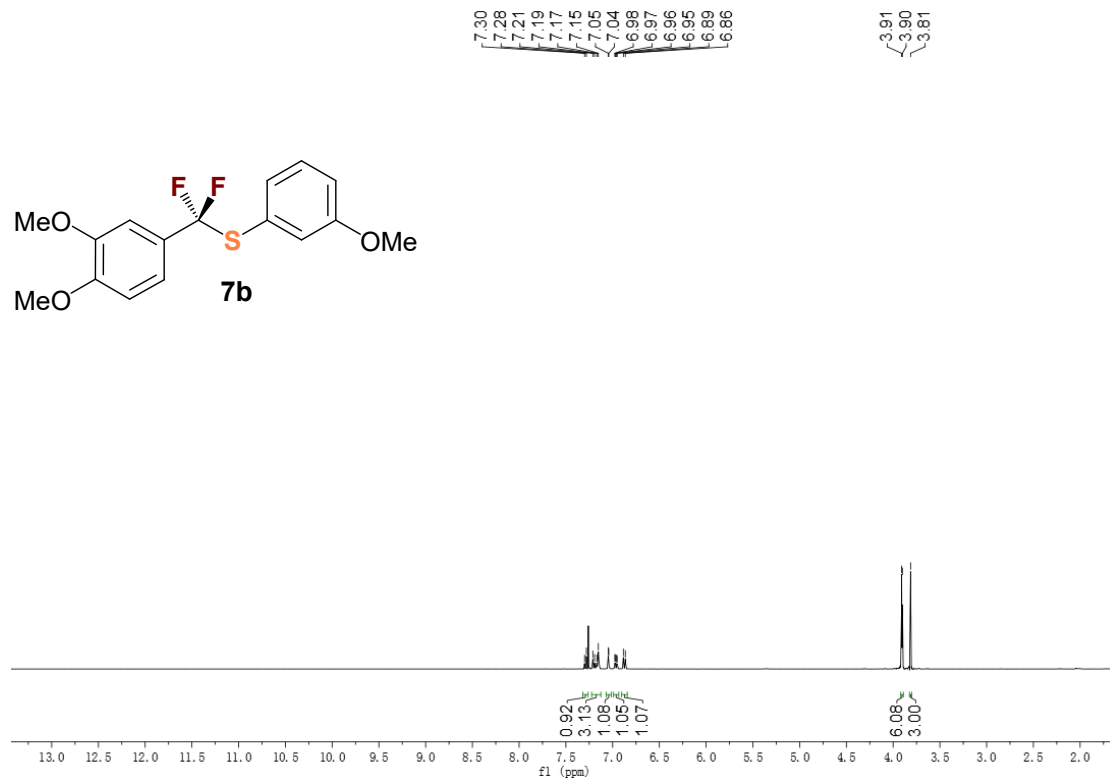

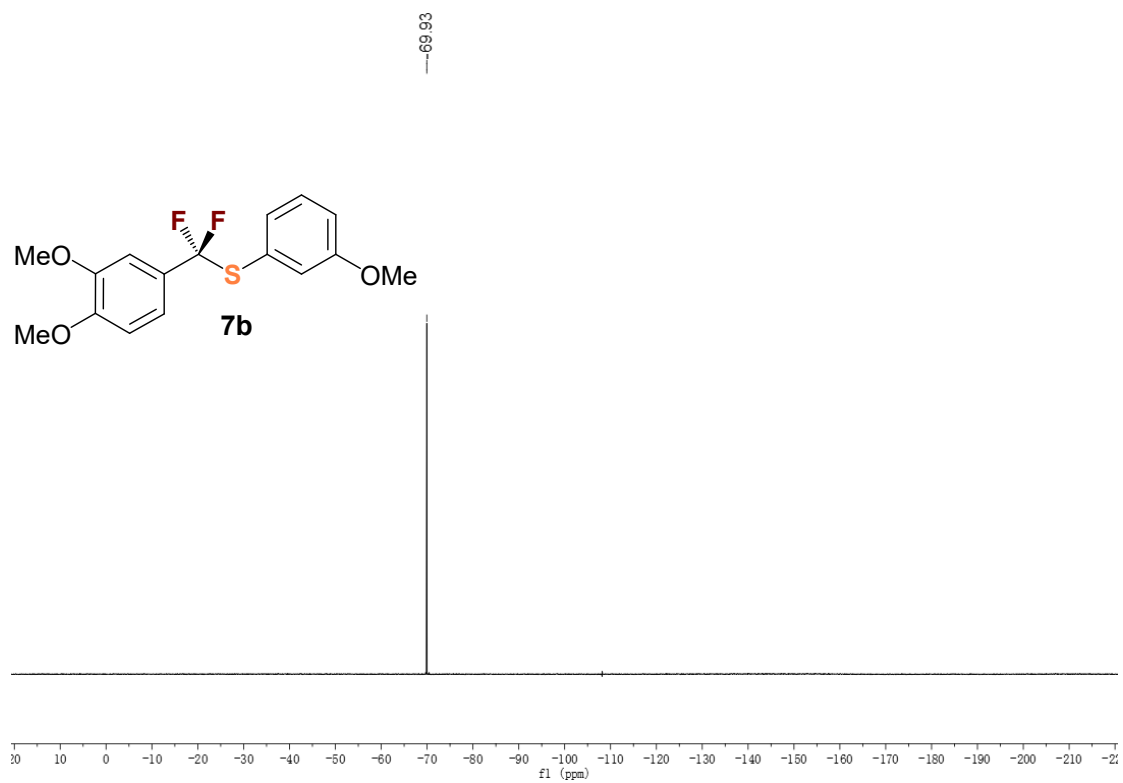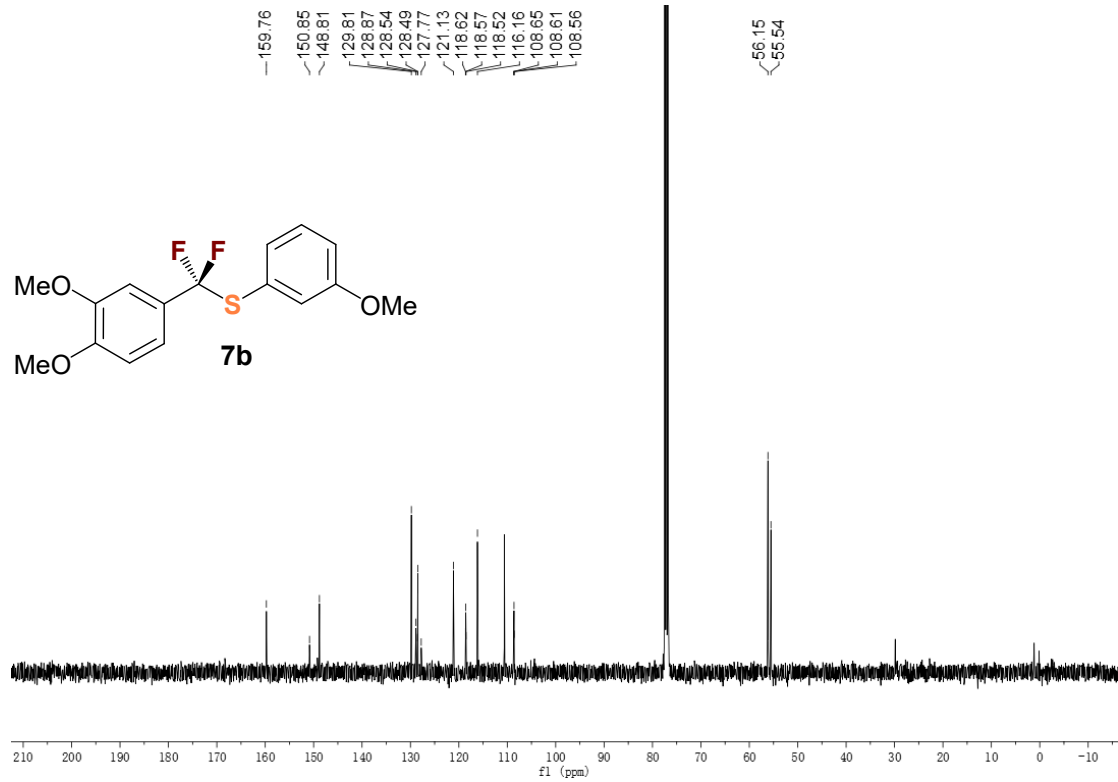

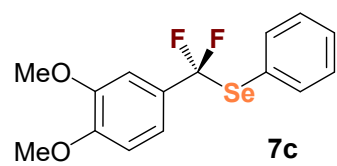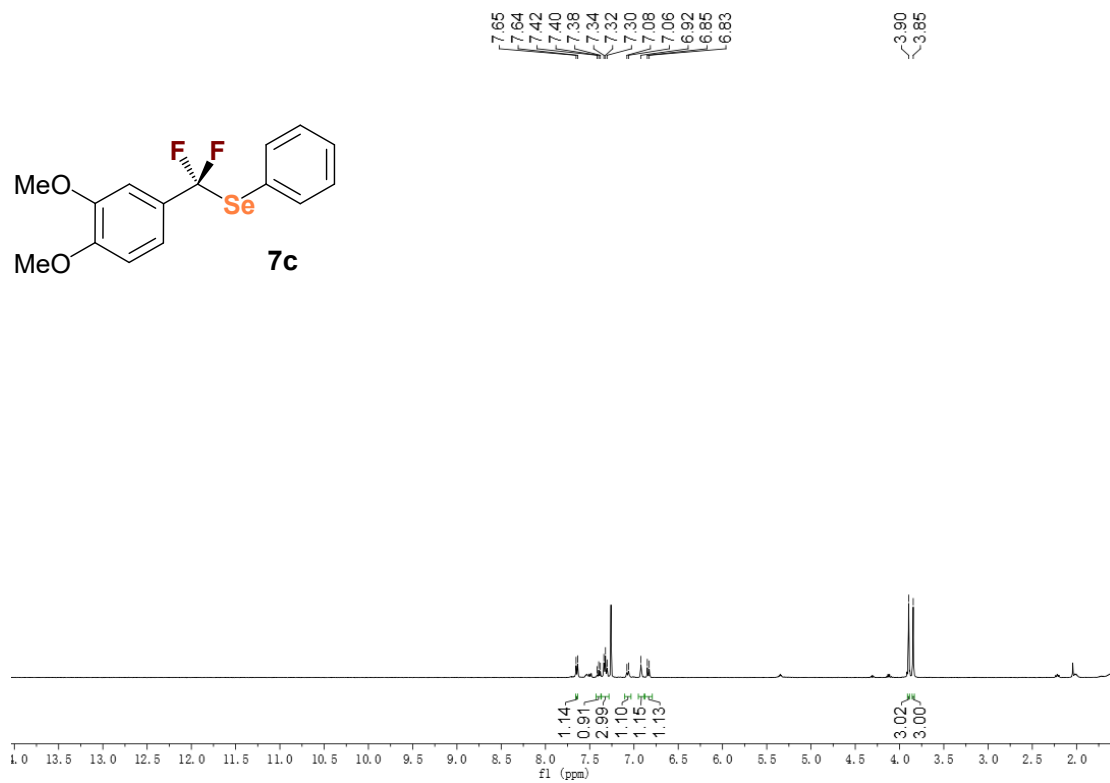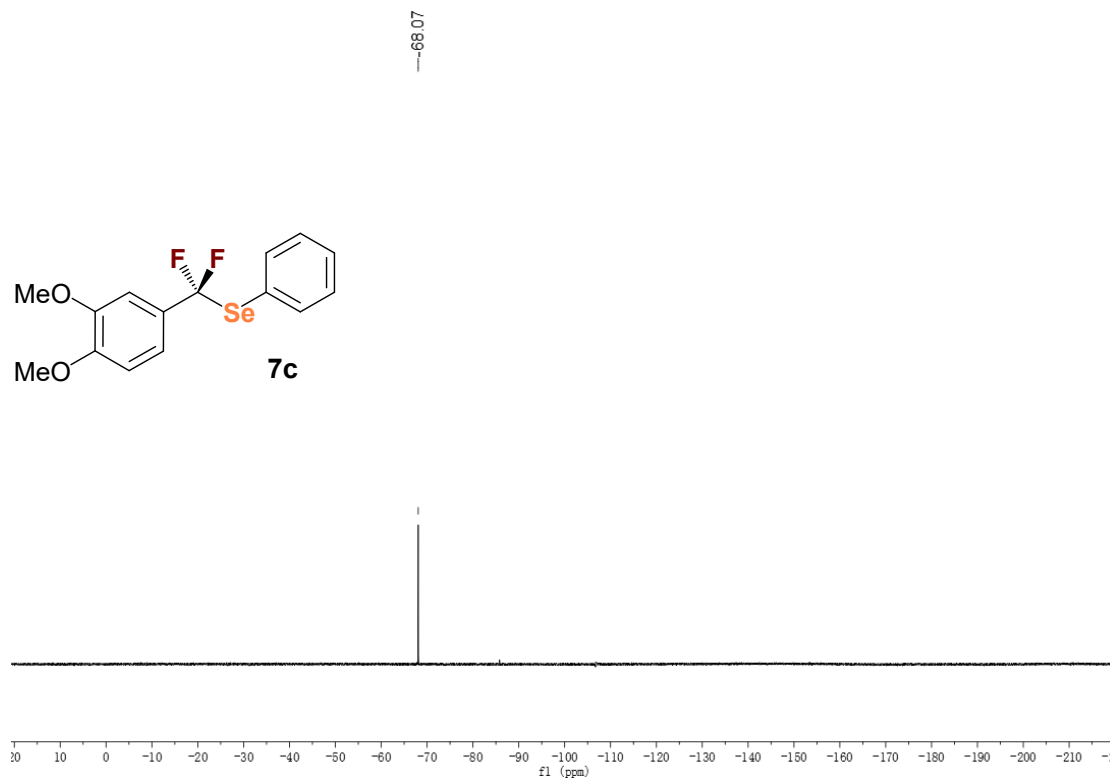

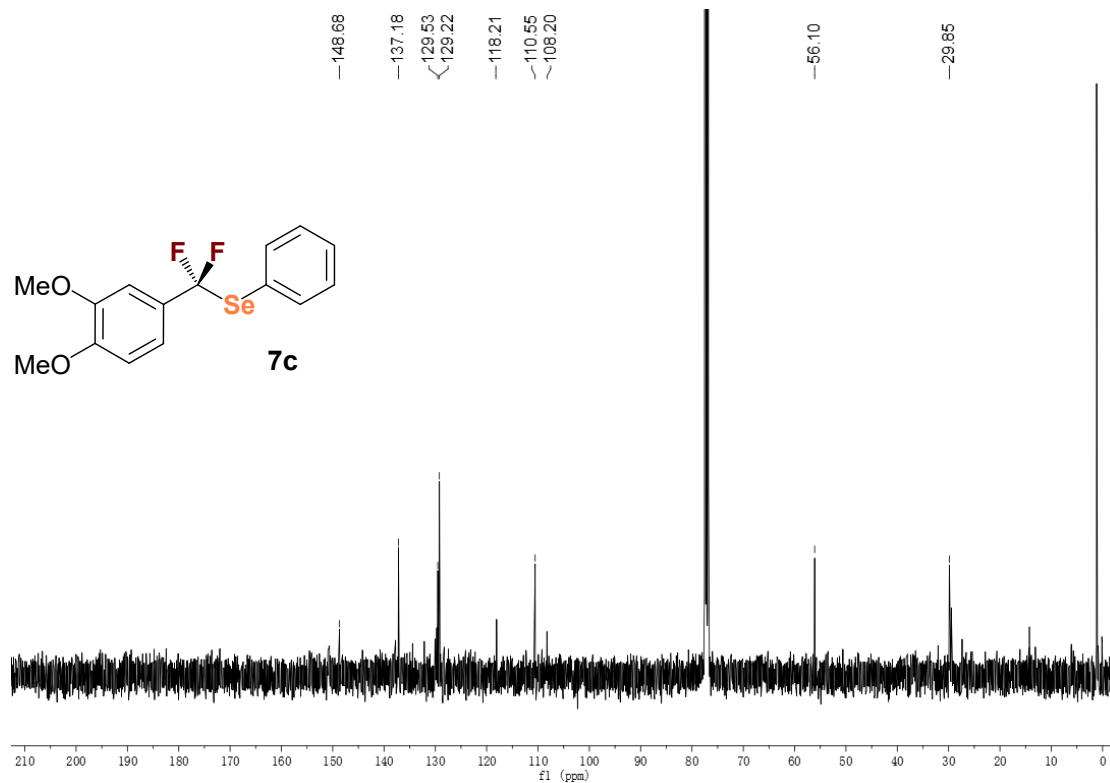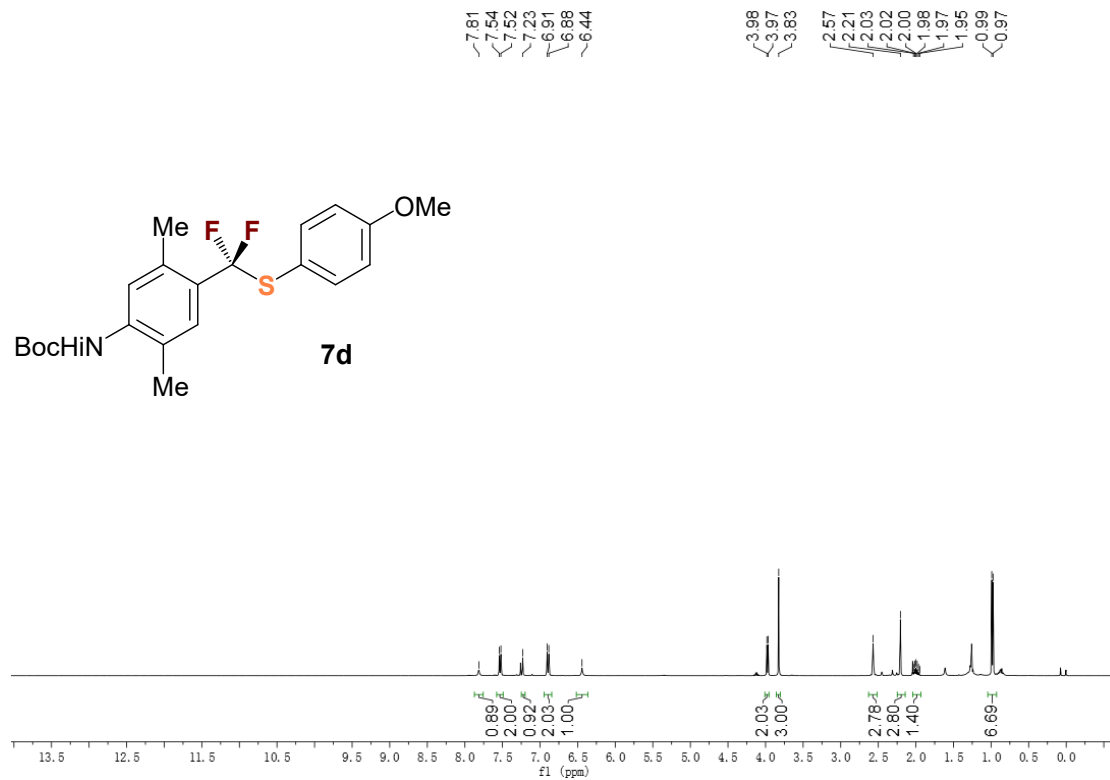

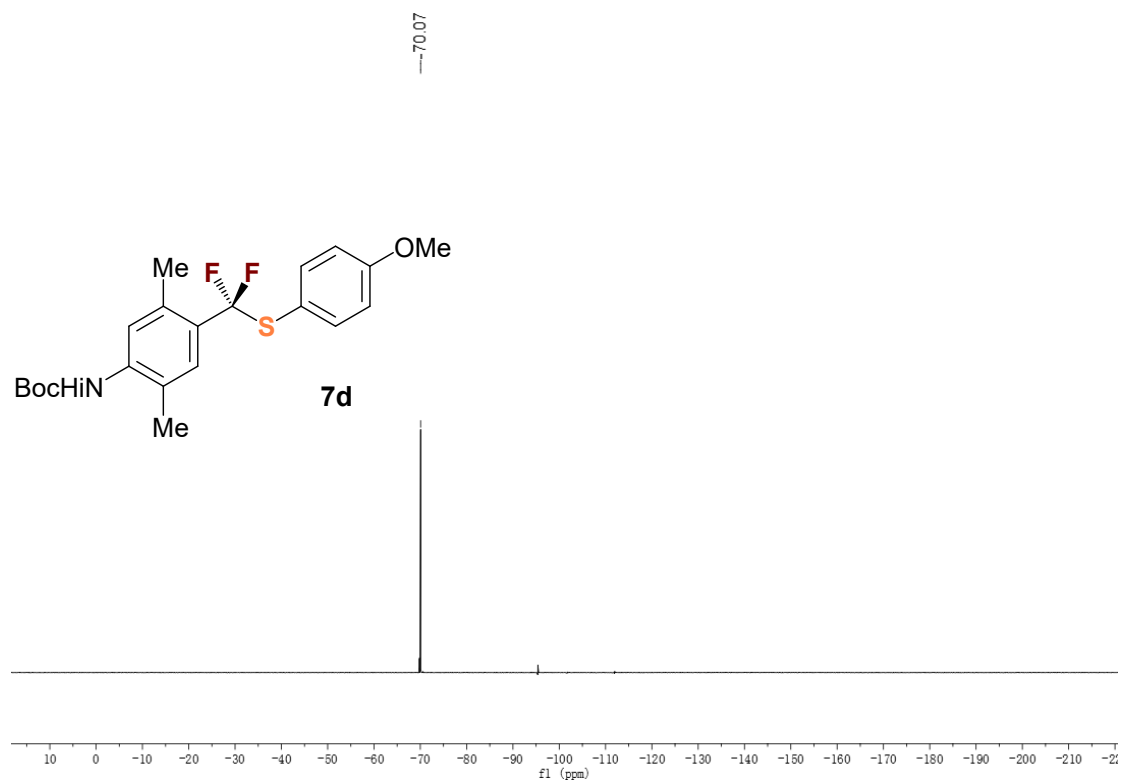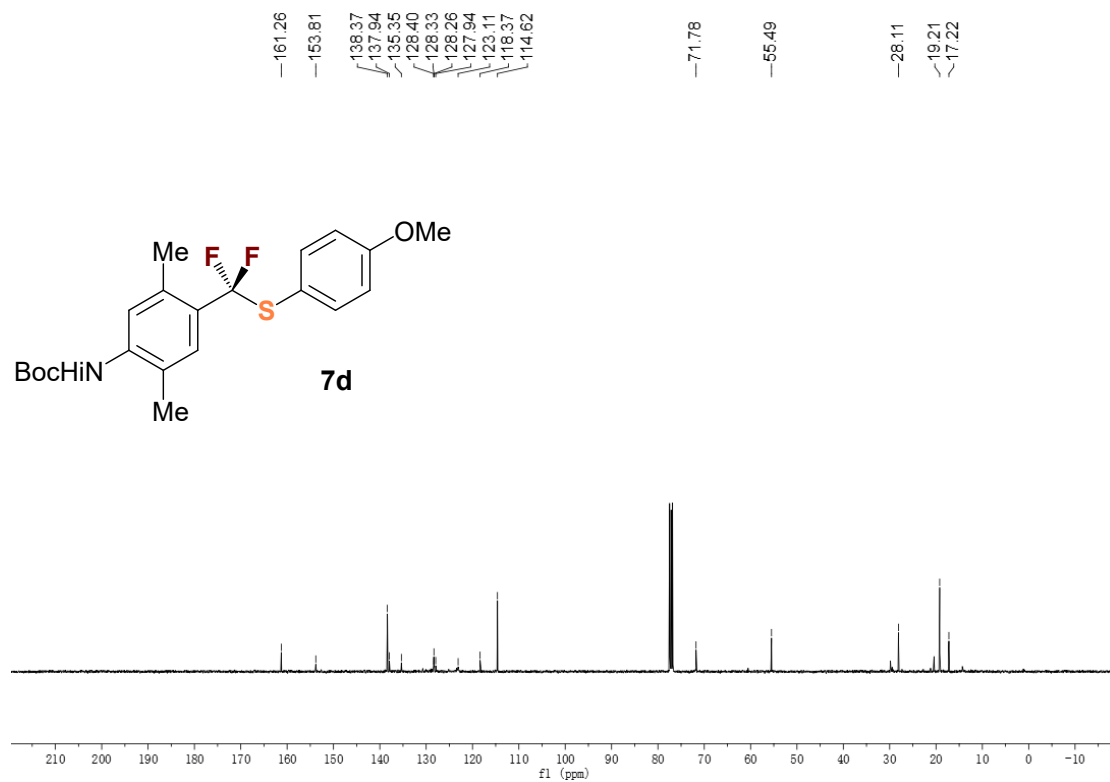



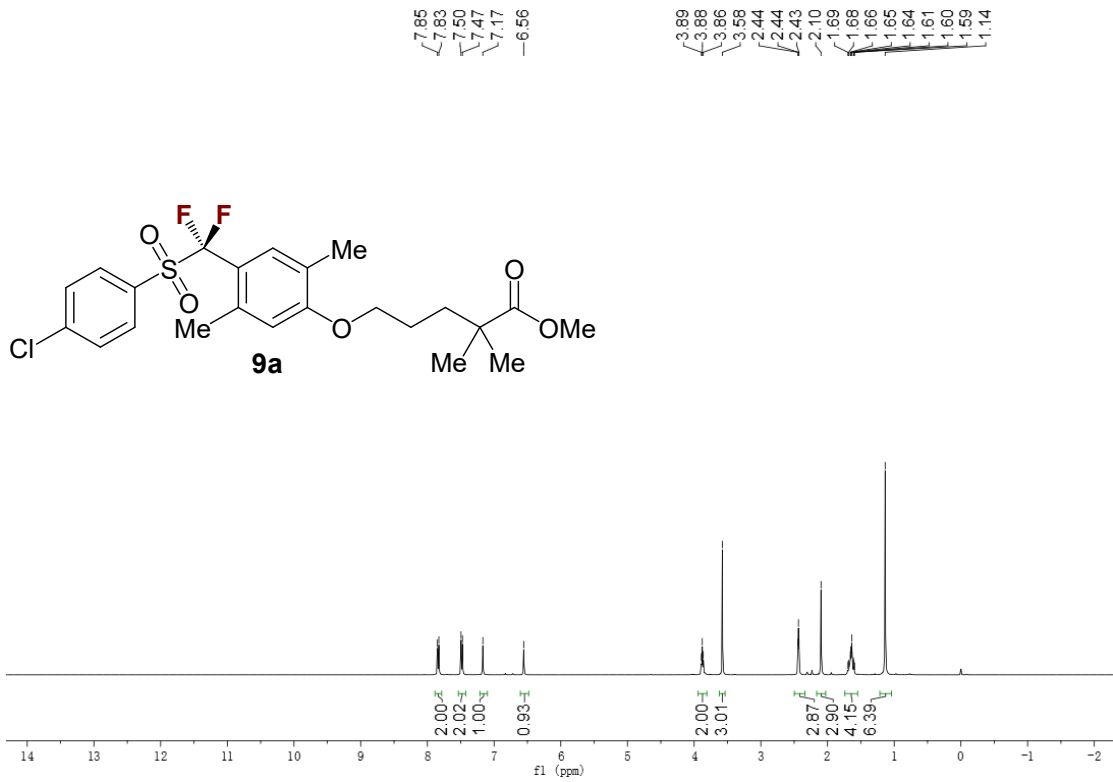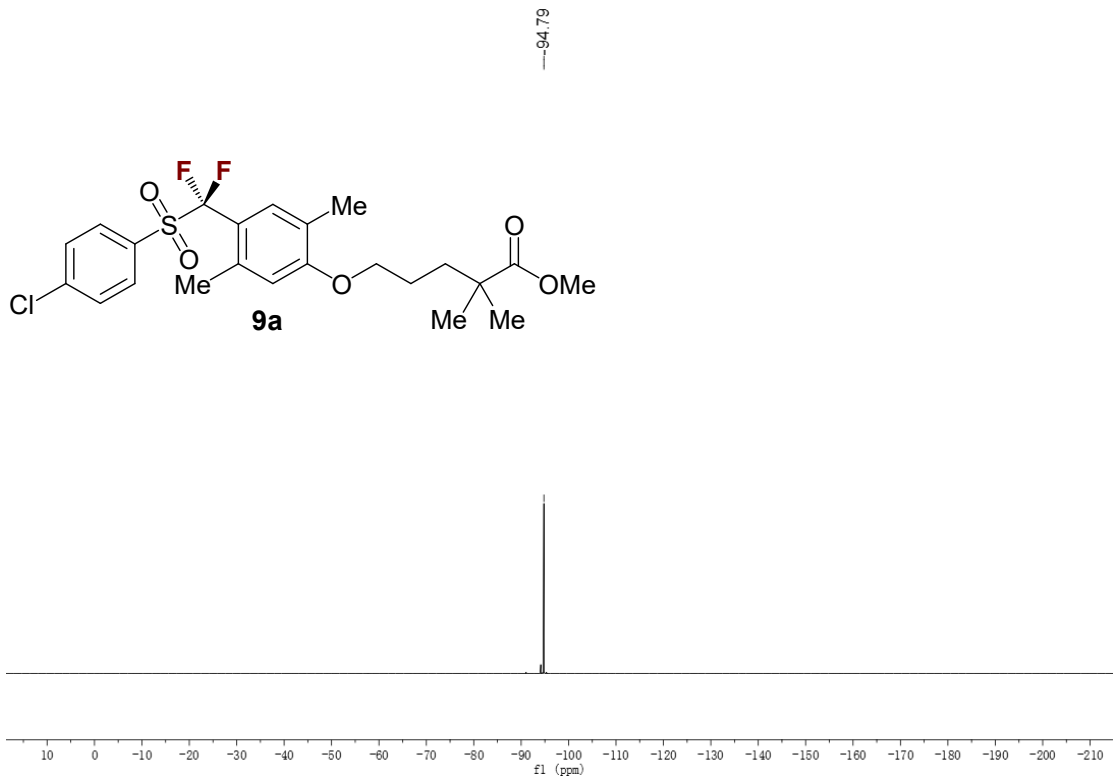

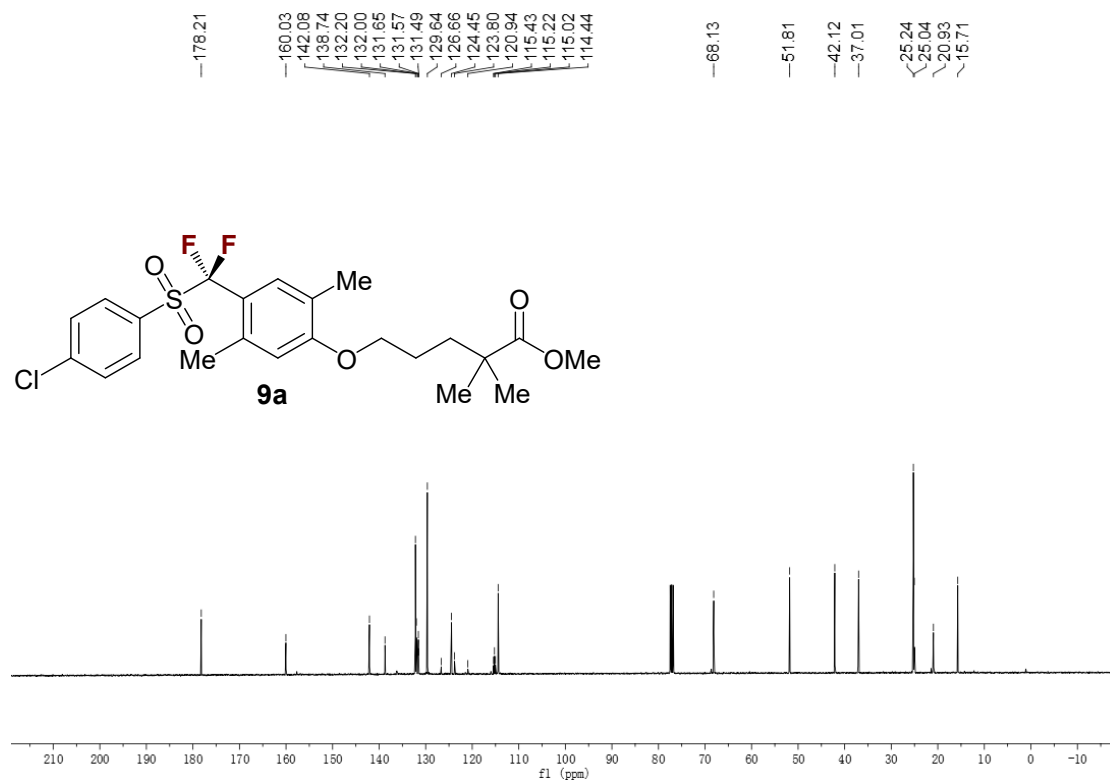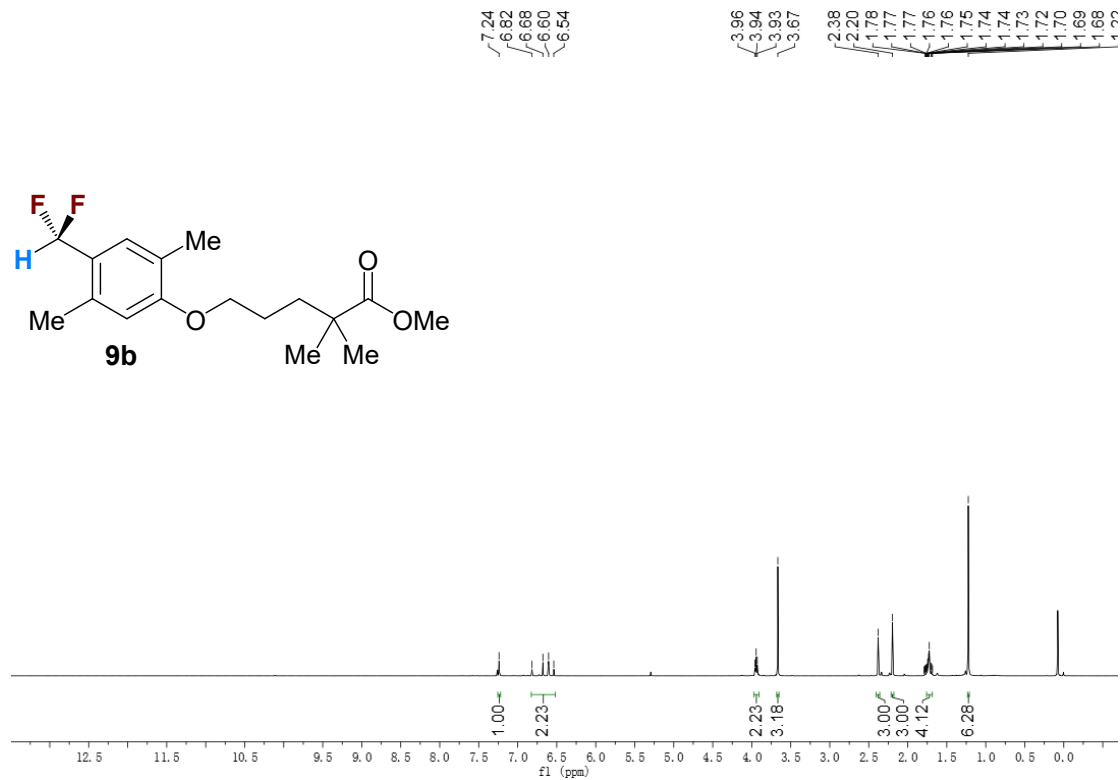

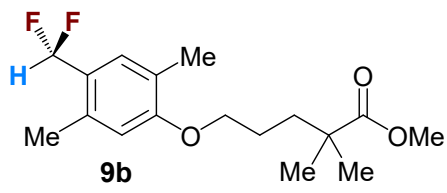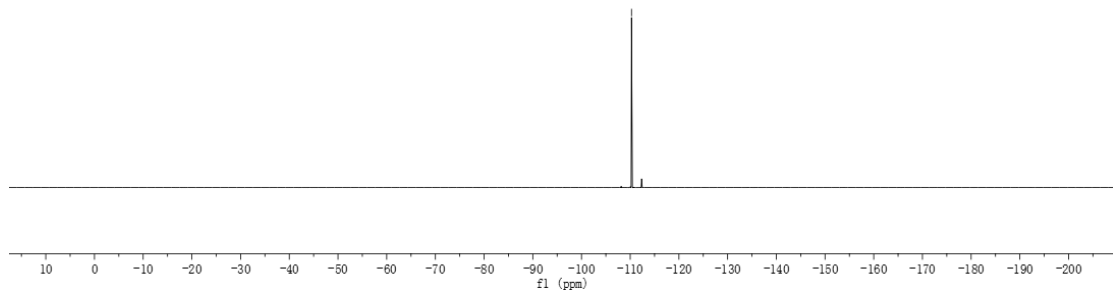

- 178.37
- 158.57
- 135.29
- 135.24
- 135.19
- 128.43
- 128.36
- 128.29
- 124.32
- 124.25
- 124.04
- 123.83
- 117.24
- 114.89
- 113.37
- 112.54
- 68.18
- 51.87
- 42.21
- 37.14
- 25.31
- 25.20
- 18.57
- 15.78

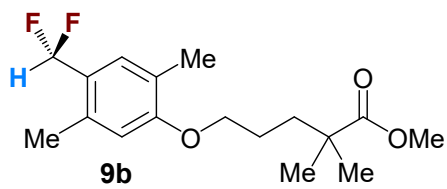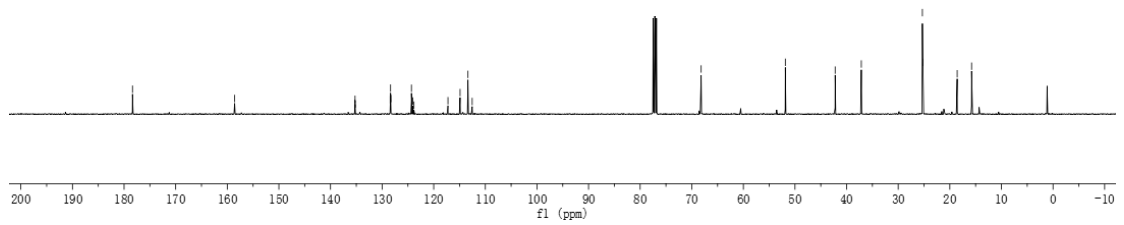

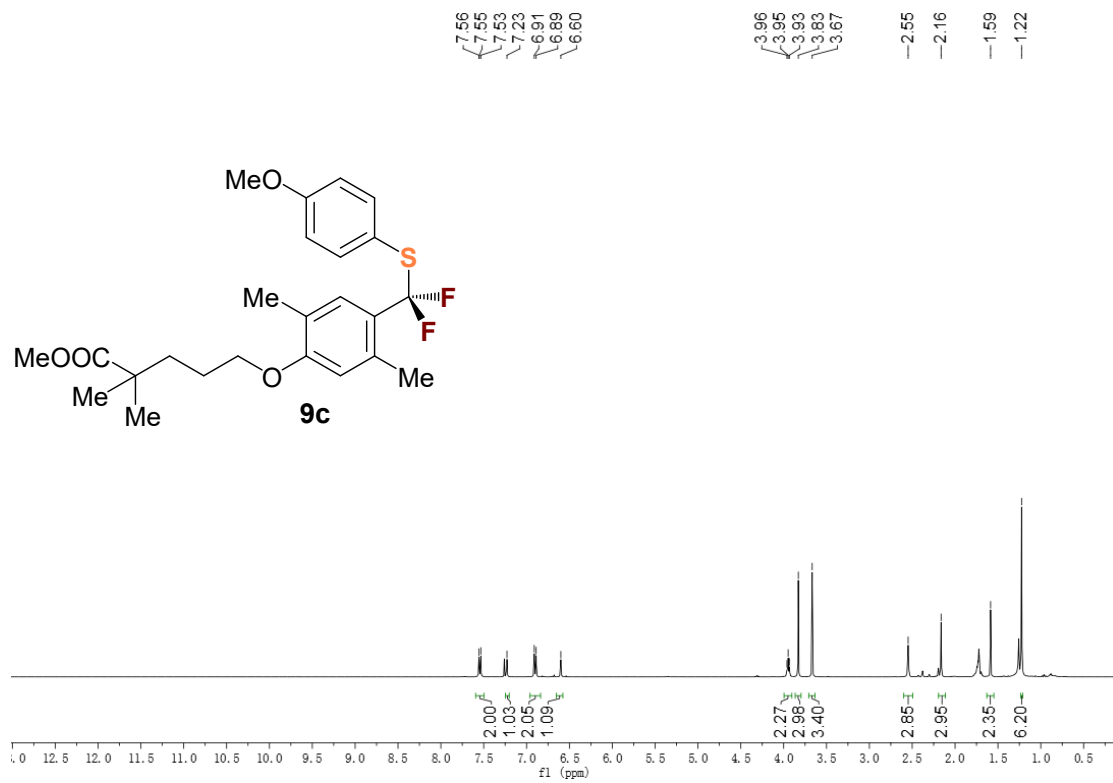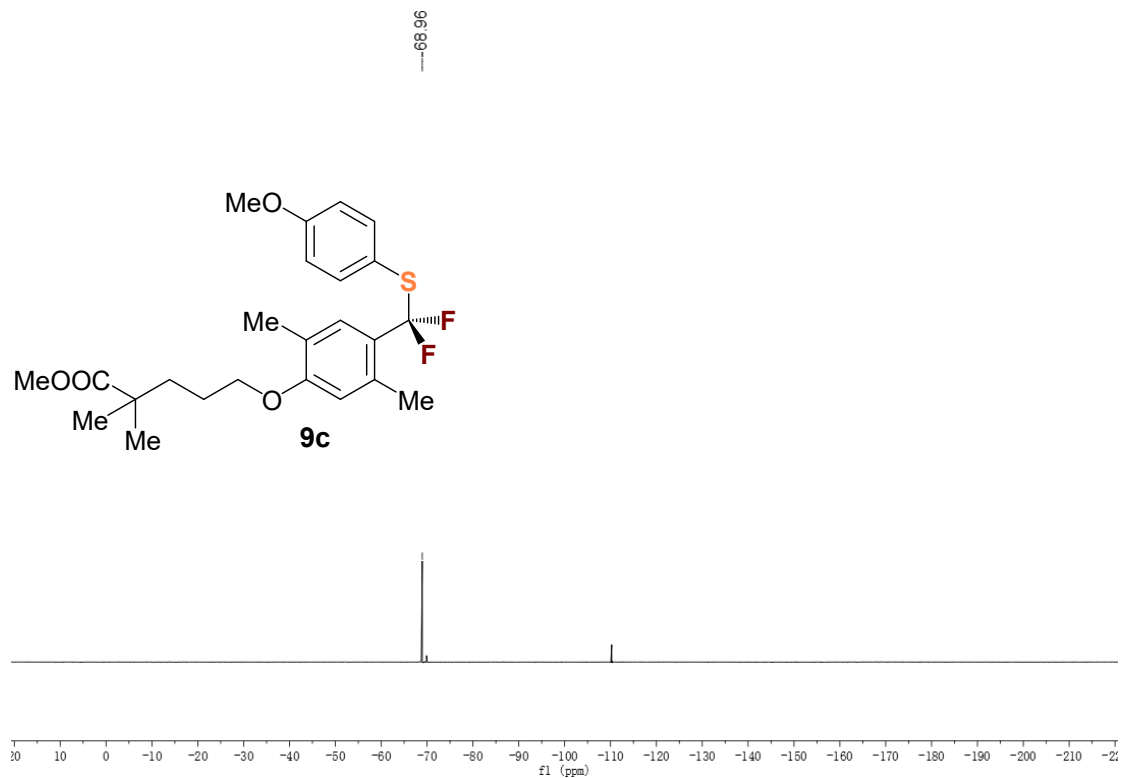

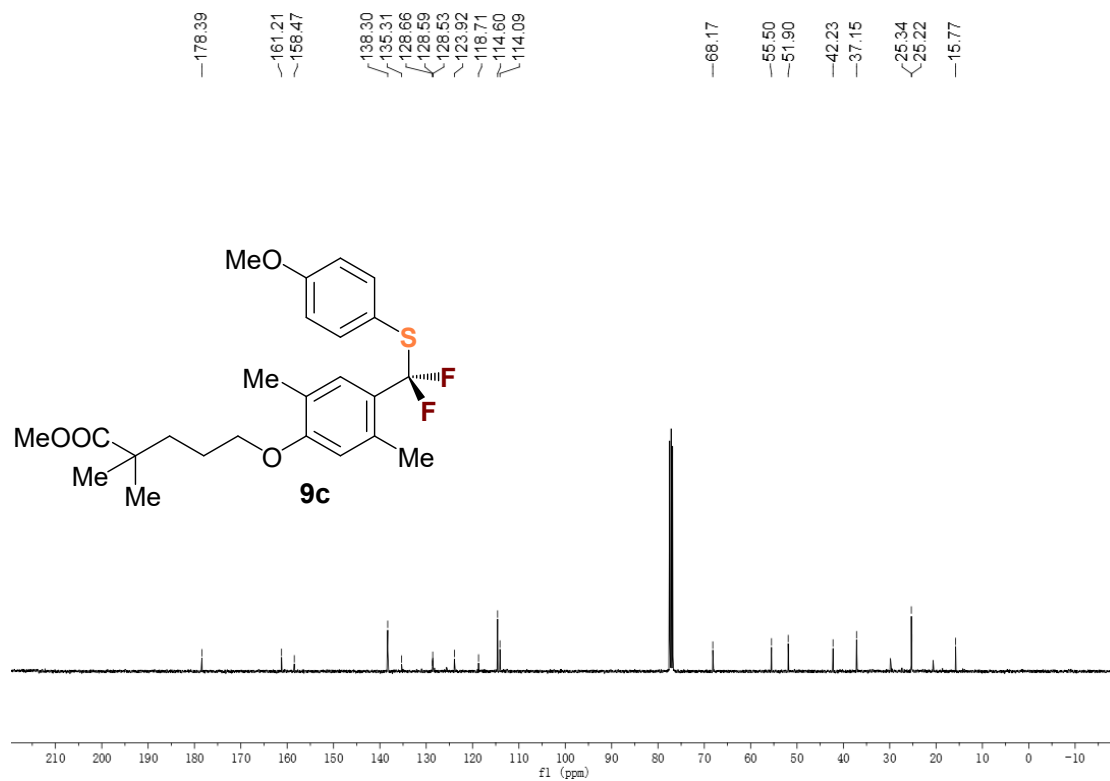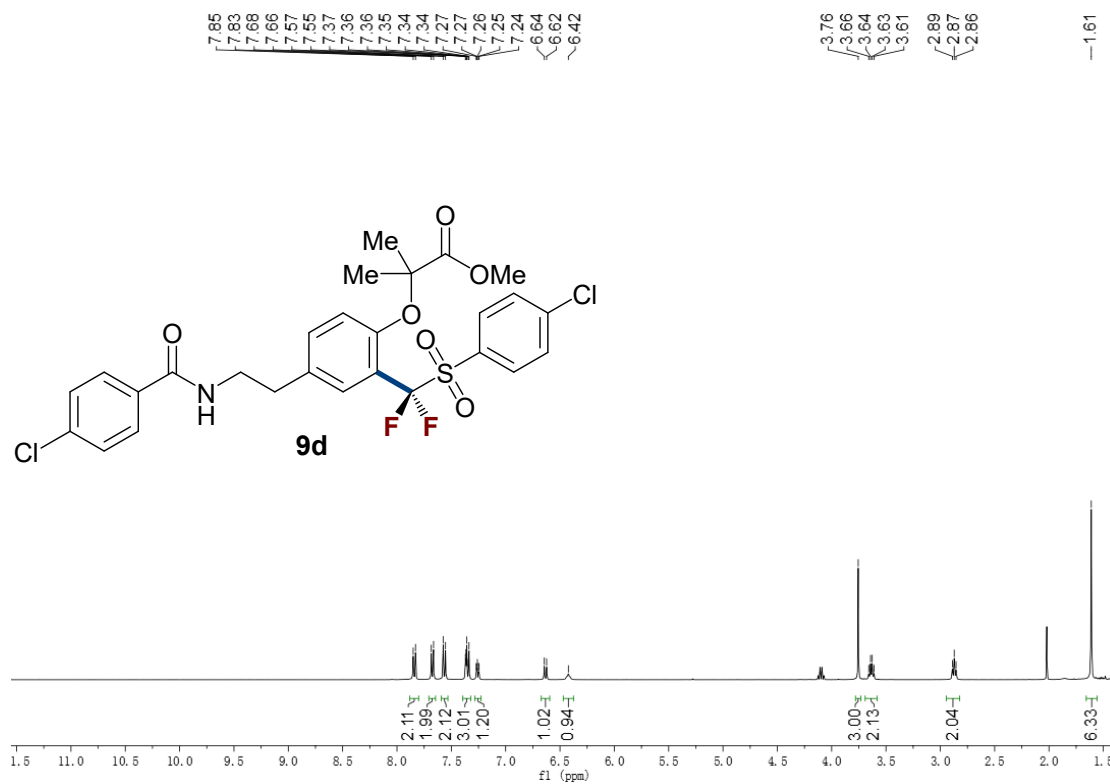

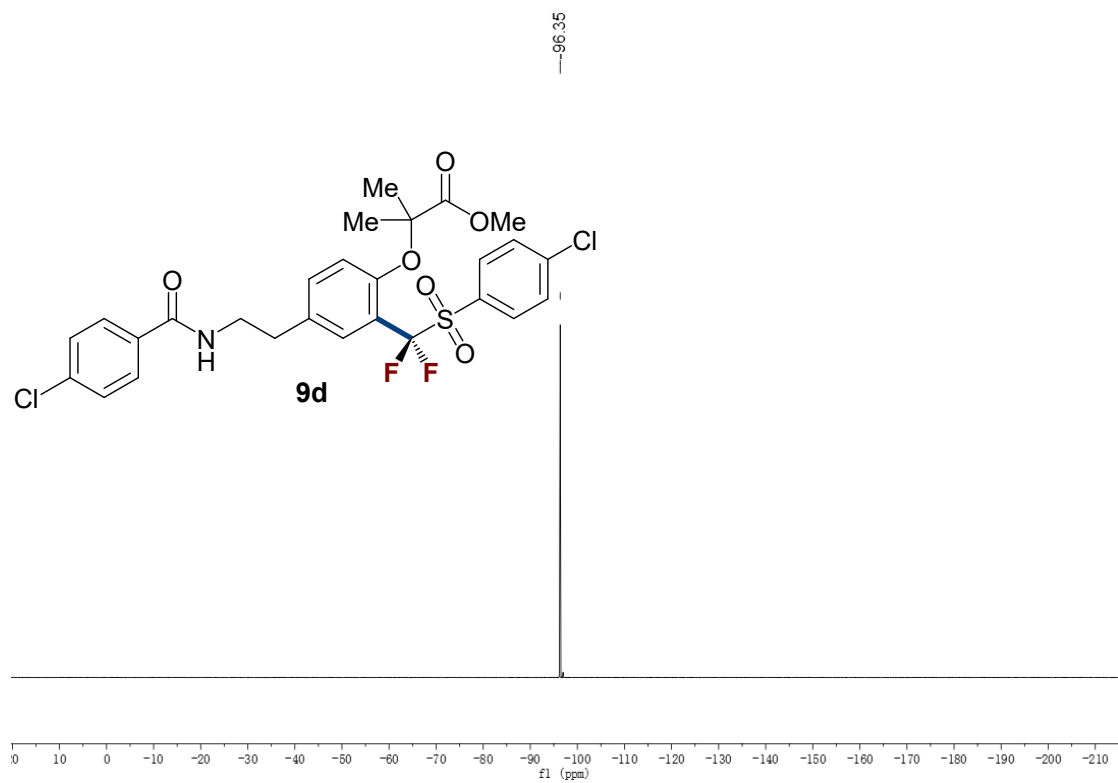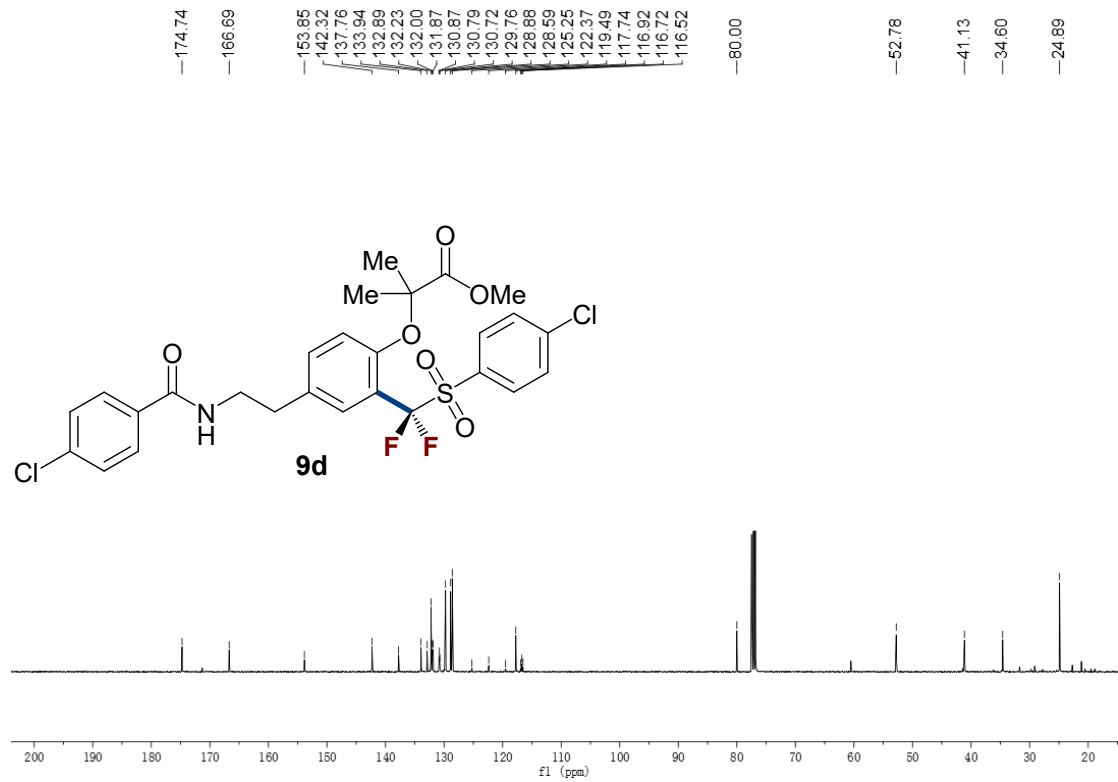

7.85  
7.83  
7.60  
7.60  
7.54  
7.52  
7.51  
7.50  
7.49  
7.49  
7.43  
7.43  
7.42  
7.42  
7.41  
7.41  
7.37  
7.35  
7.35  
7.07  
7.05  
7.04  
7.04  
7.03  
7.02  
5.52  
5.48

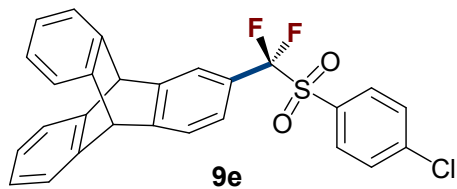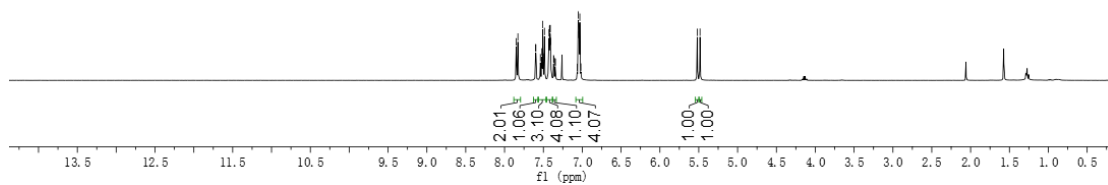

---100.77

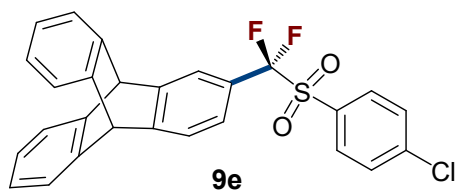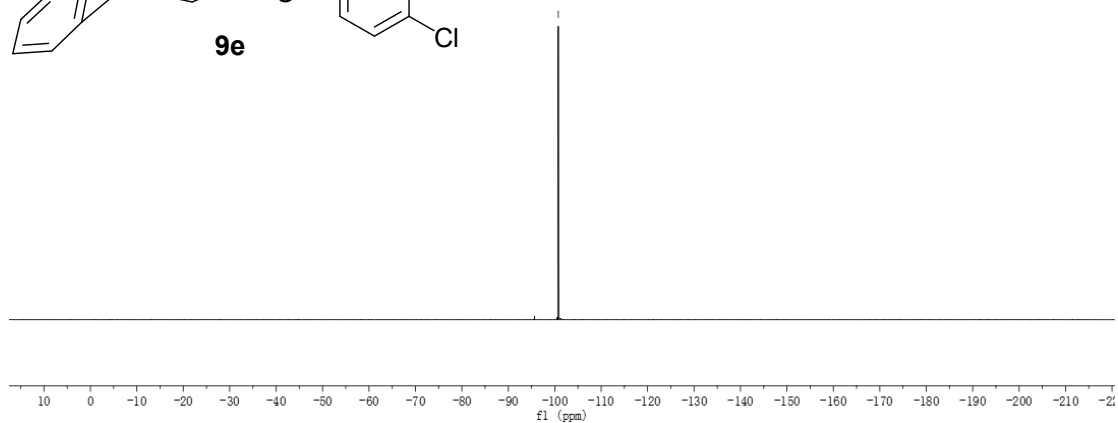

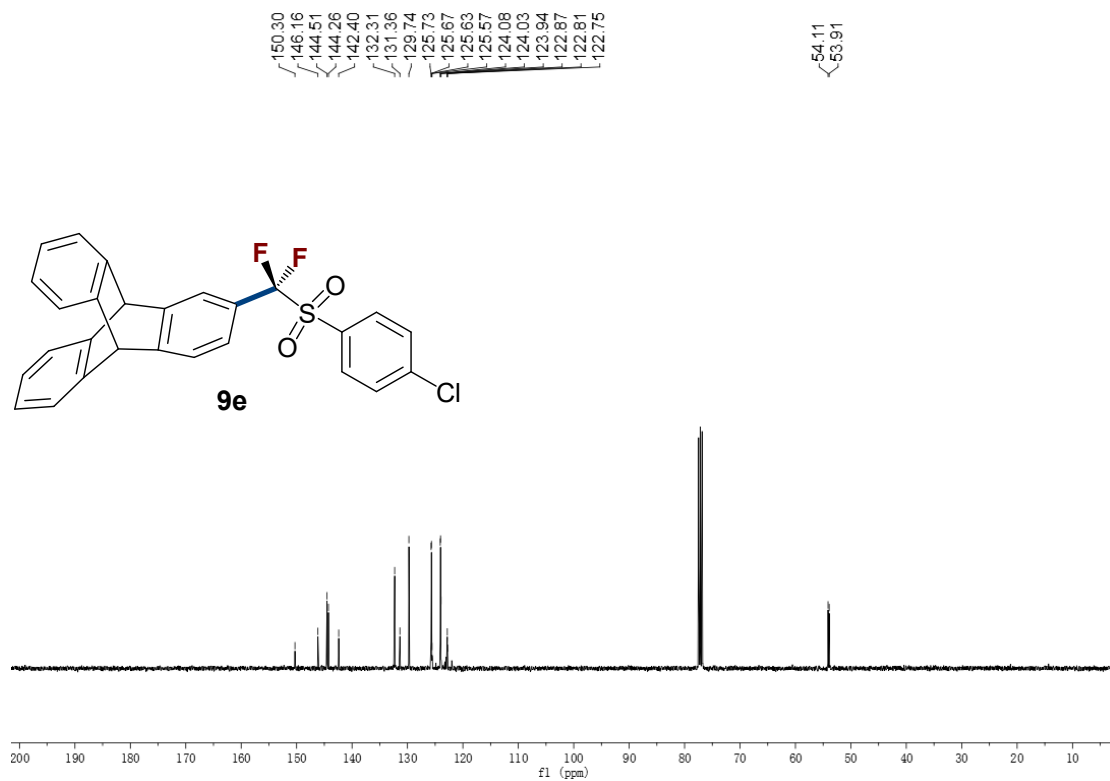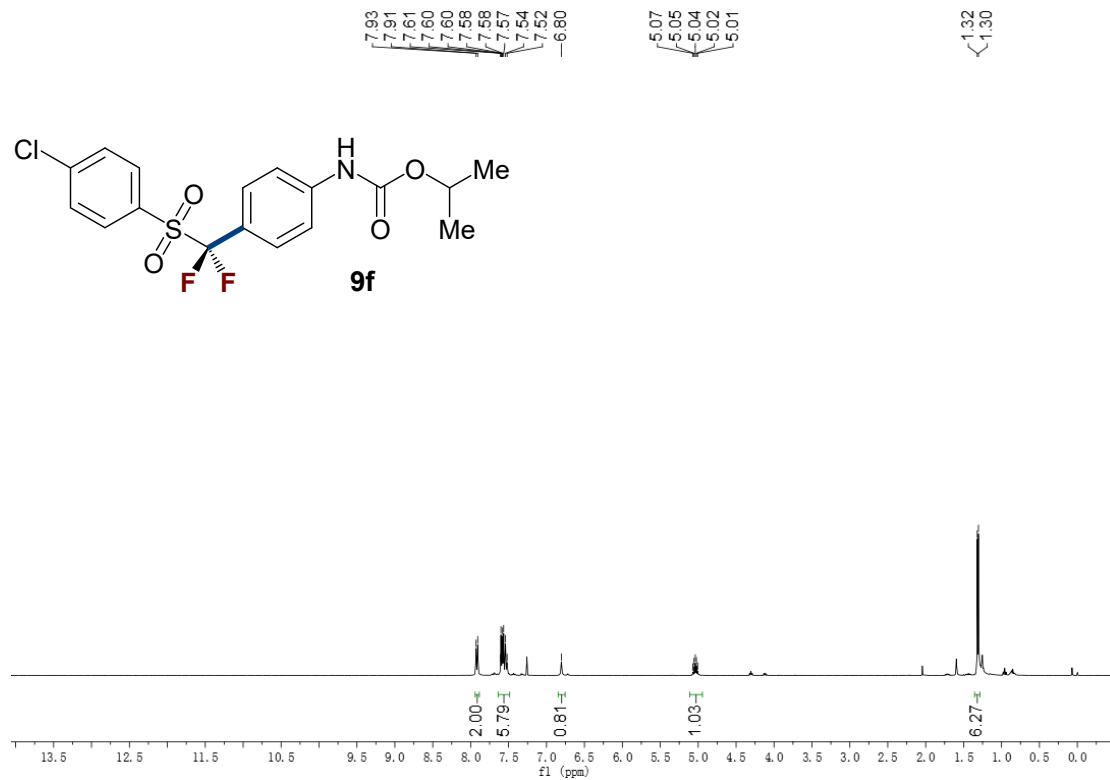



-101.33

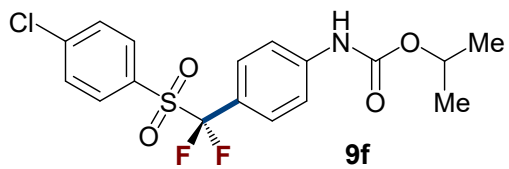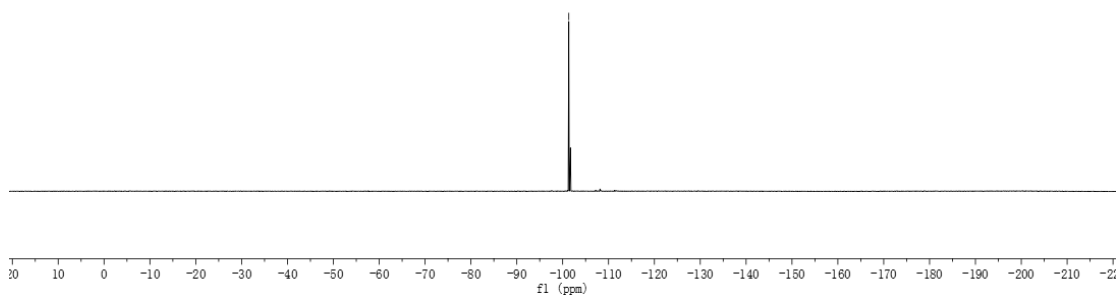

152.85  
142.50  
142.36  
132.35  
131.48  
129.84  
128.17  
120.25  
120.02  
117.99  
69.58  
22.17

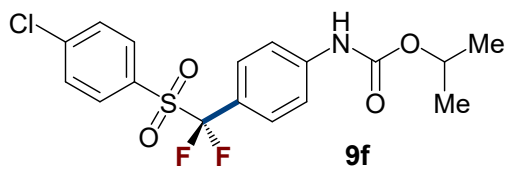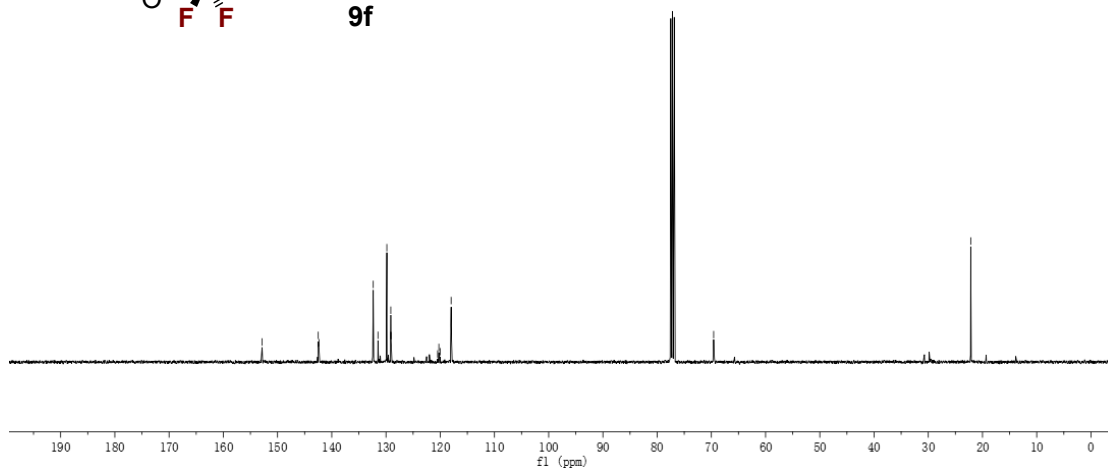

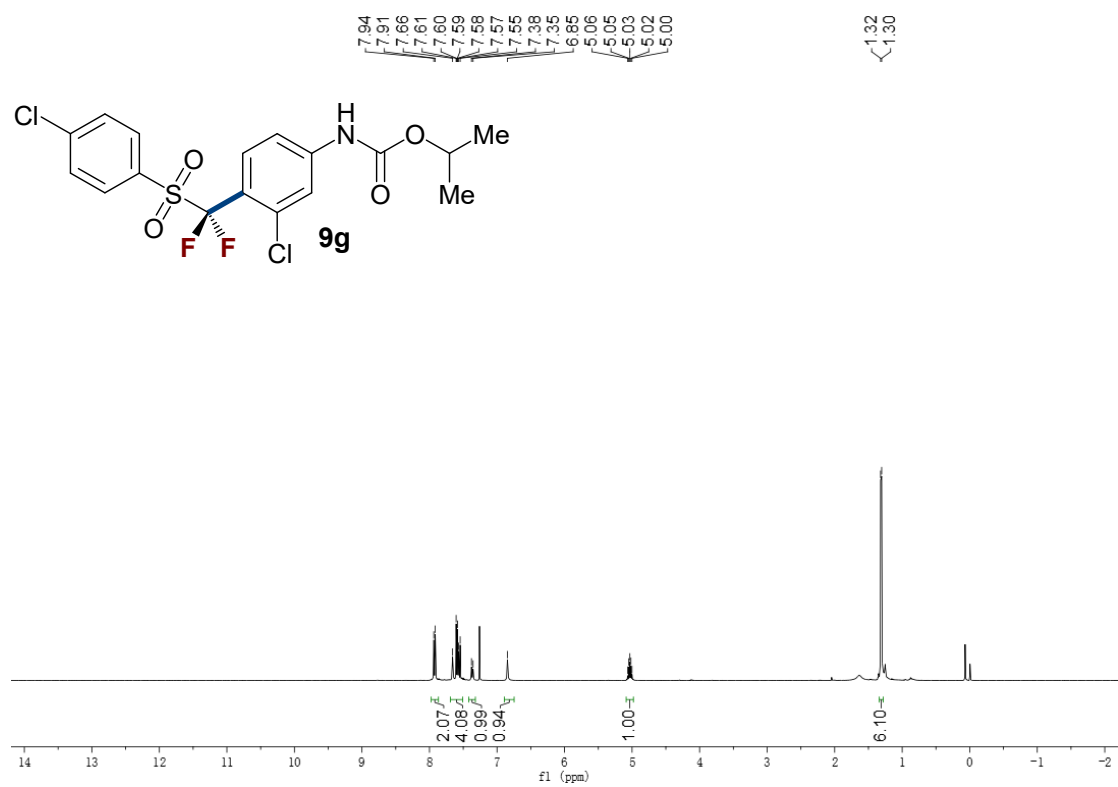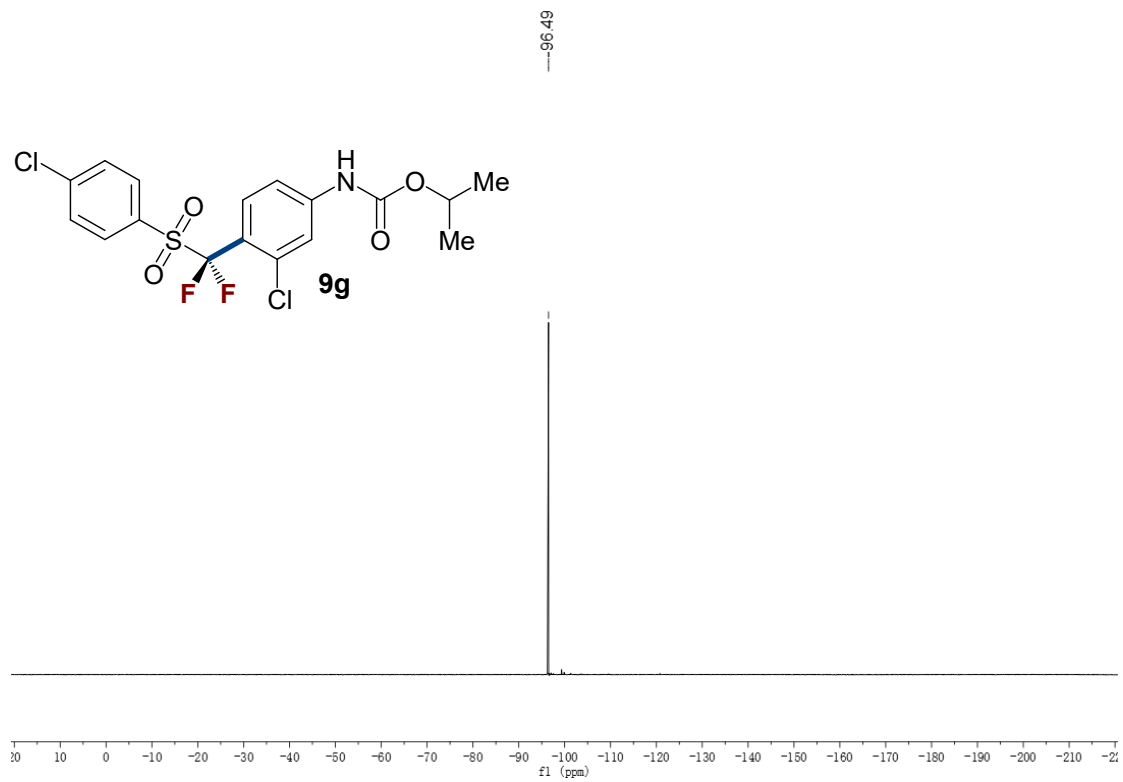

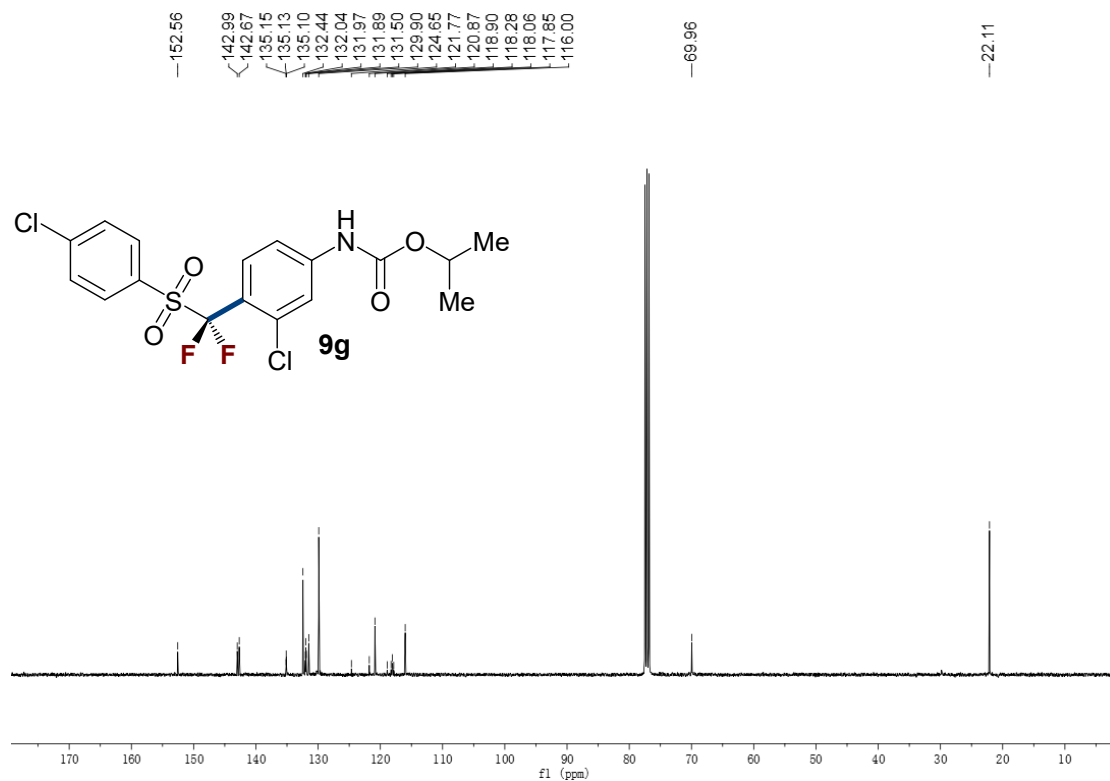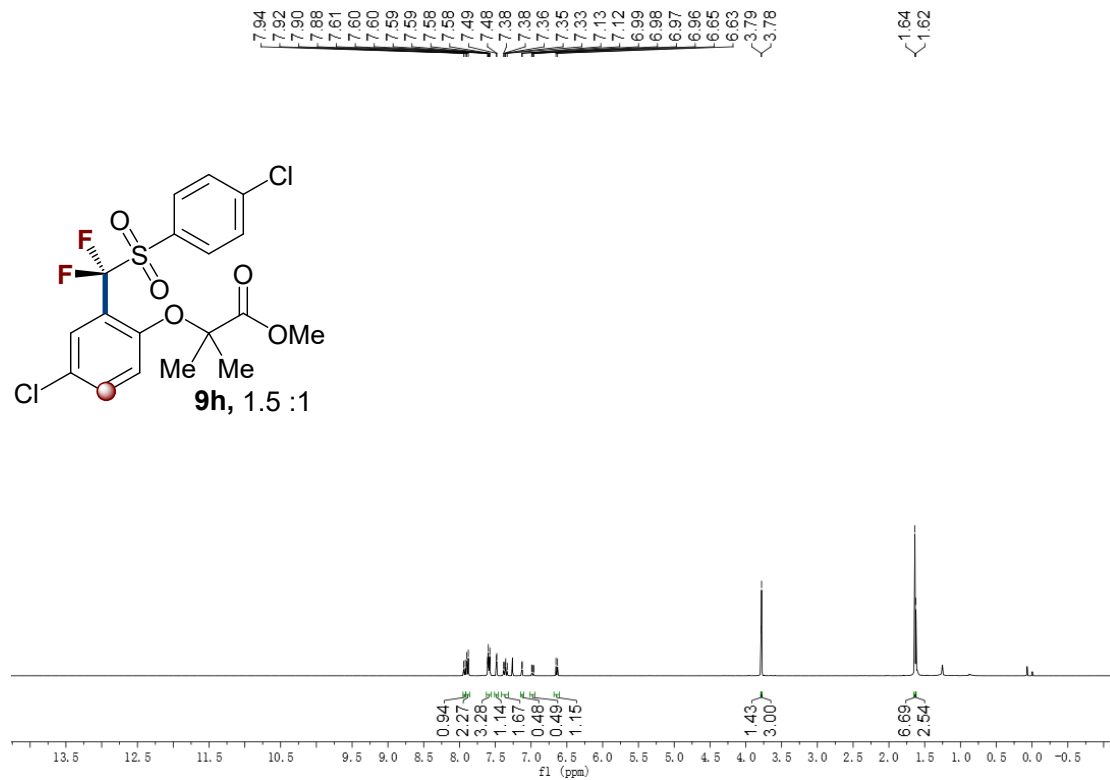

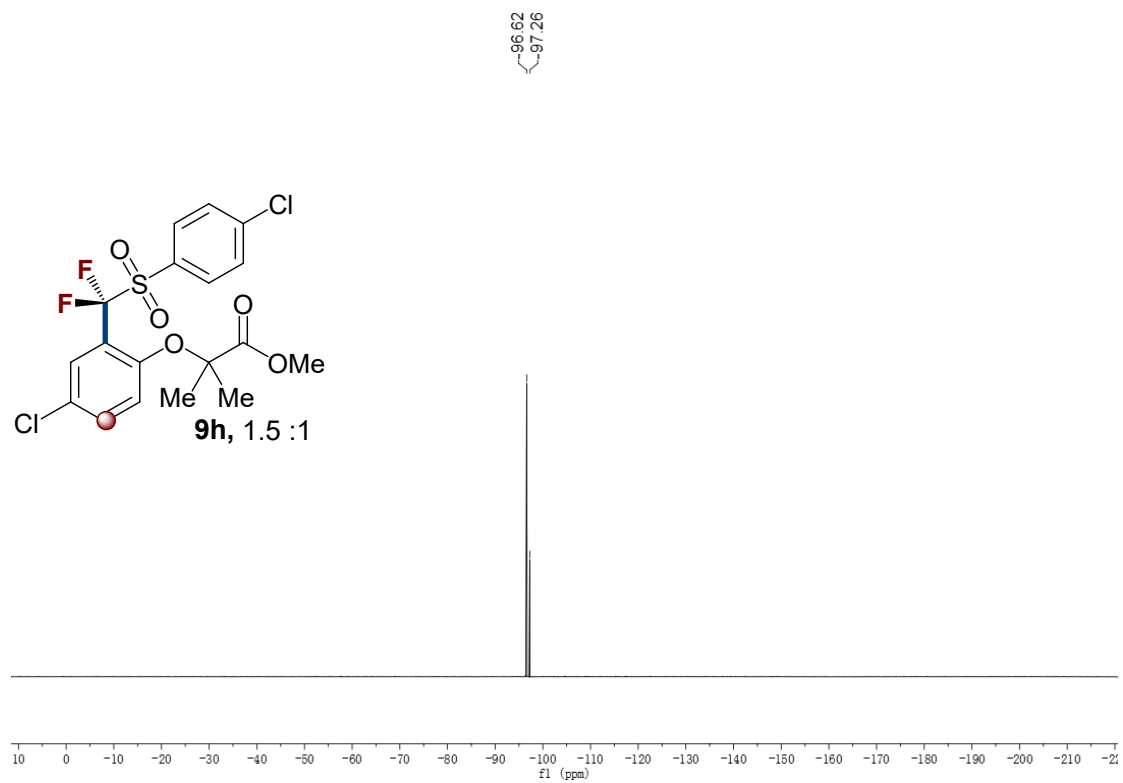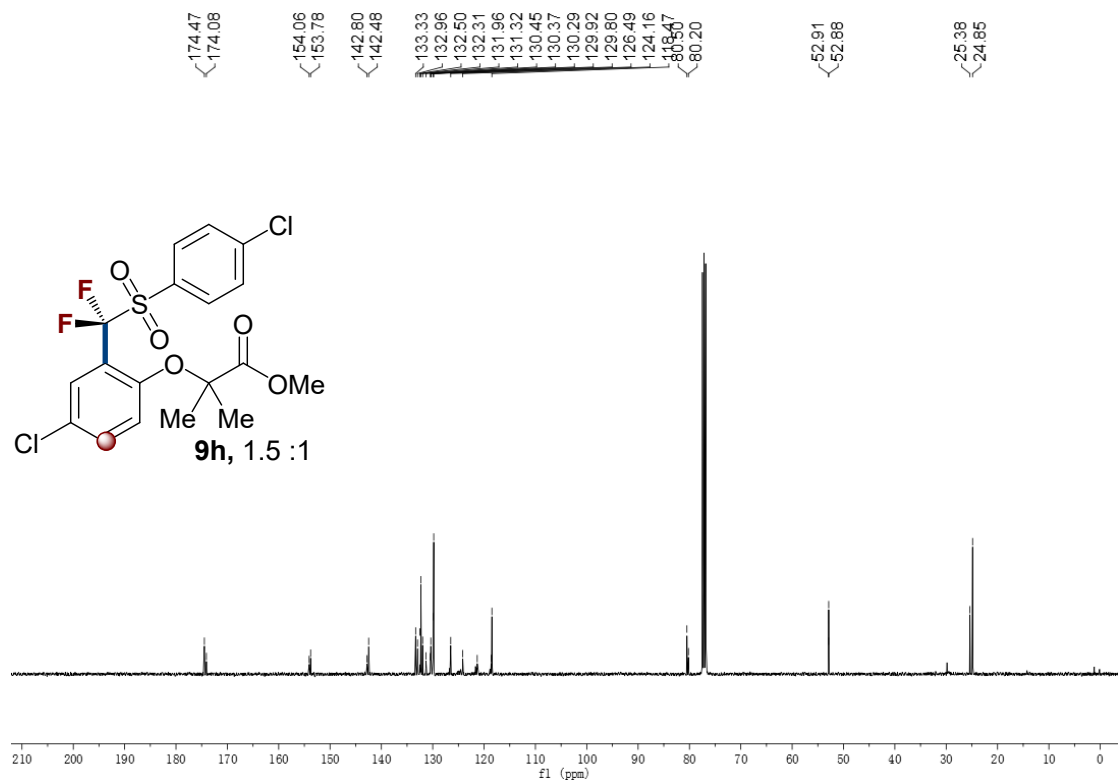

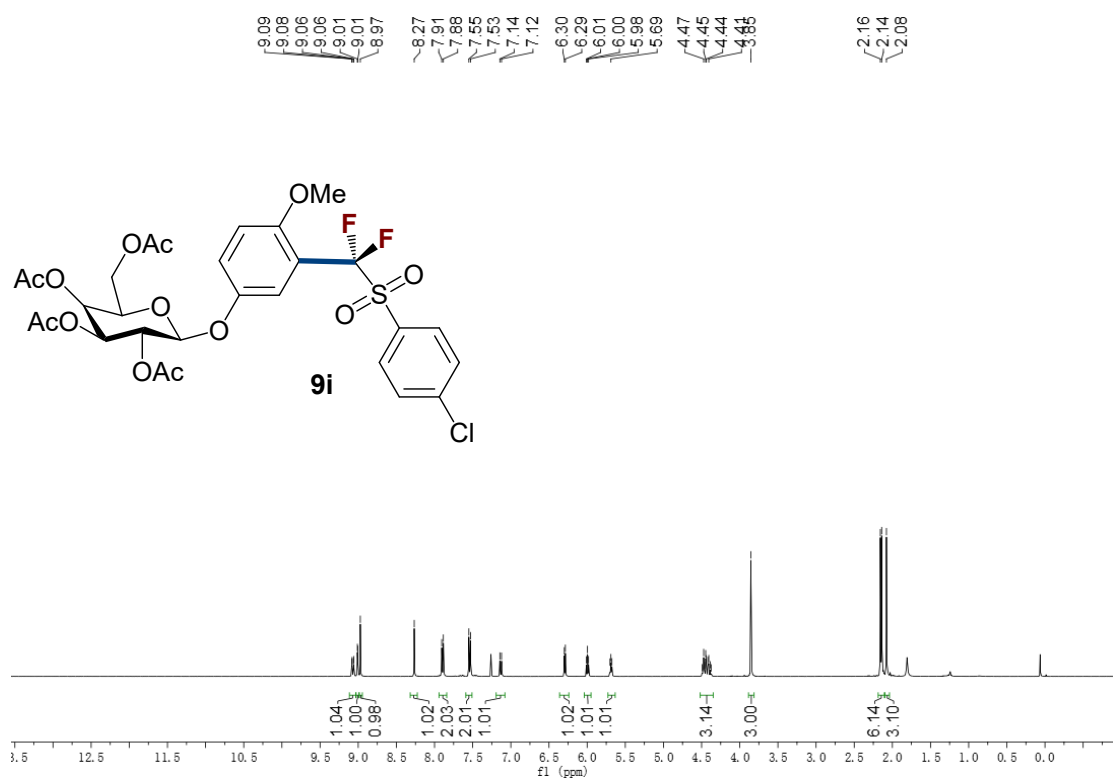

--97.29

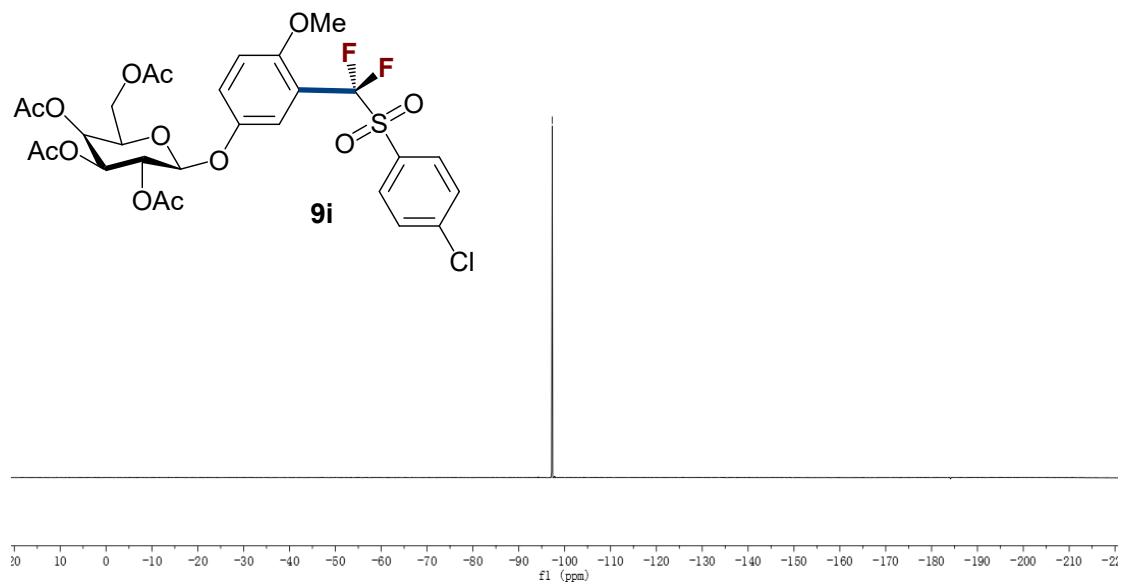

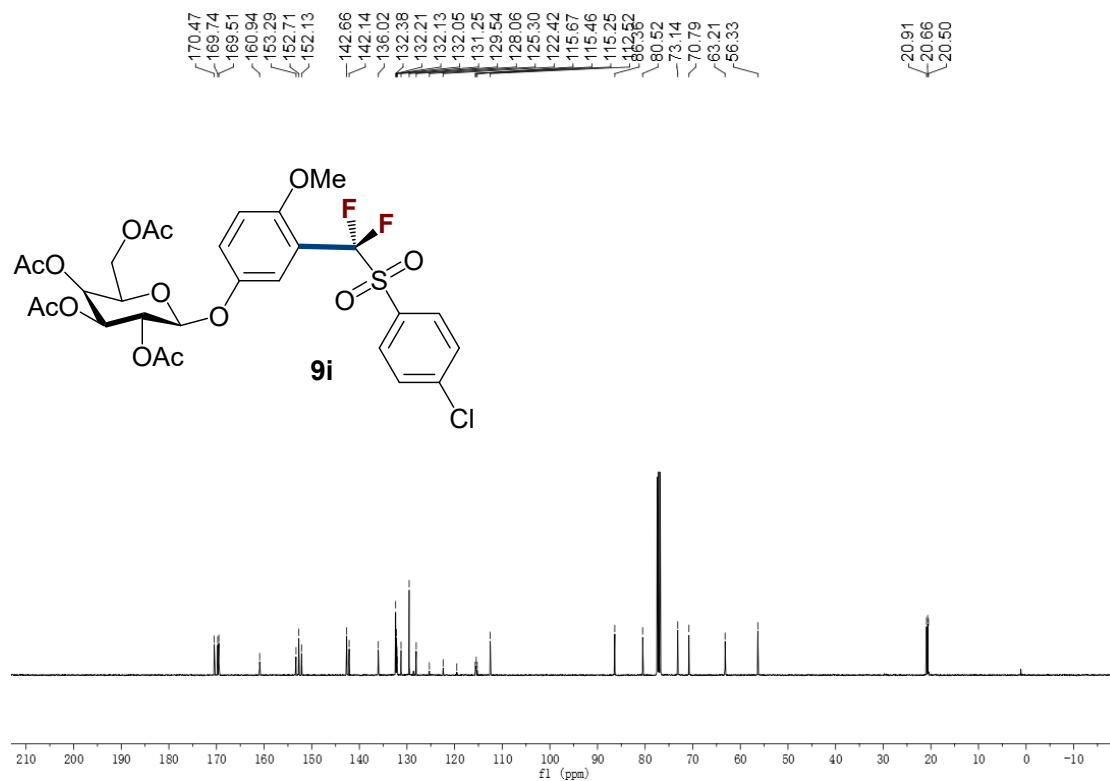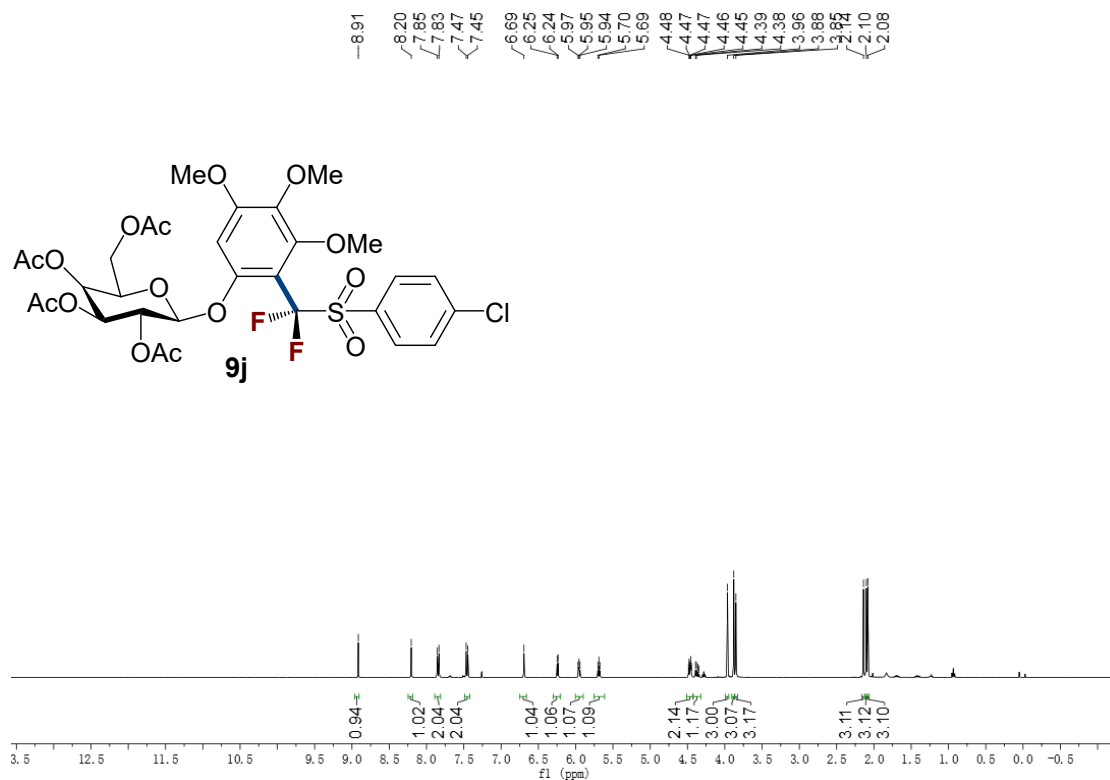

---84.87

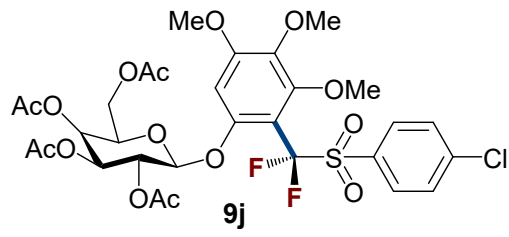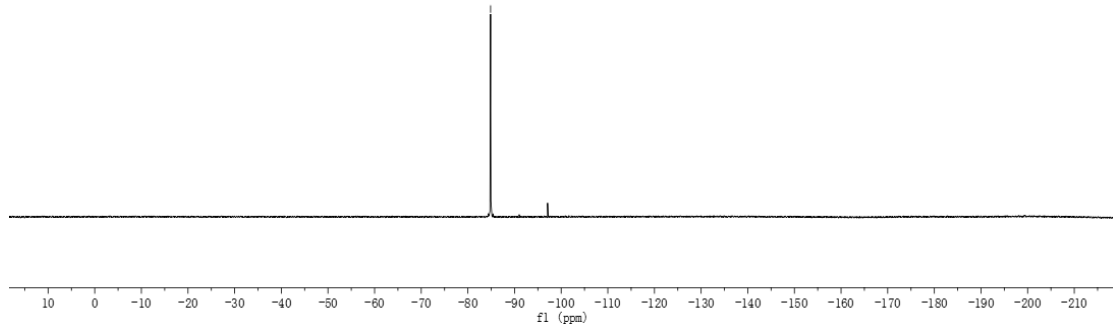

170.37, 166.68, 169.54, 156.15, 151.90, 150.89, 143.31, 143.20, 141.47, 132.09, 126.36, 123.45, 120.54, 113.68, 113.48, 113.28, 110.42, 86.90, 80.31, 73.29, 70.43, 62.91, 62.04, 60.91, 56.29, 20.81, 20.59, 20.53

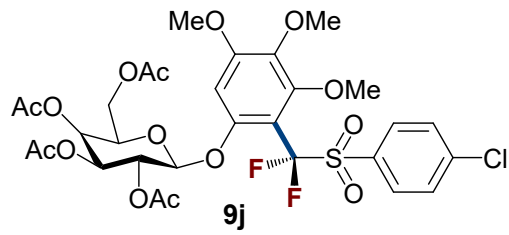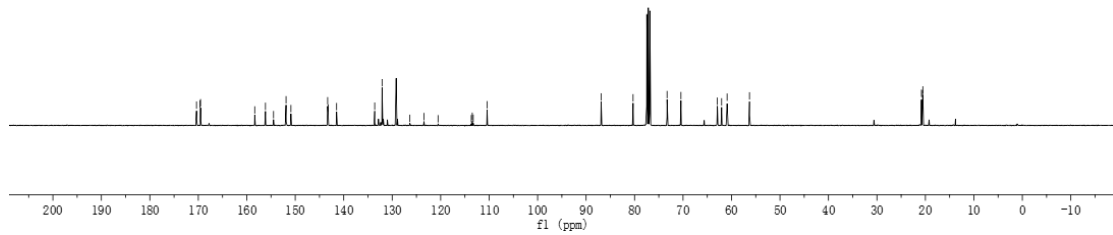

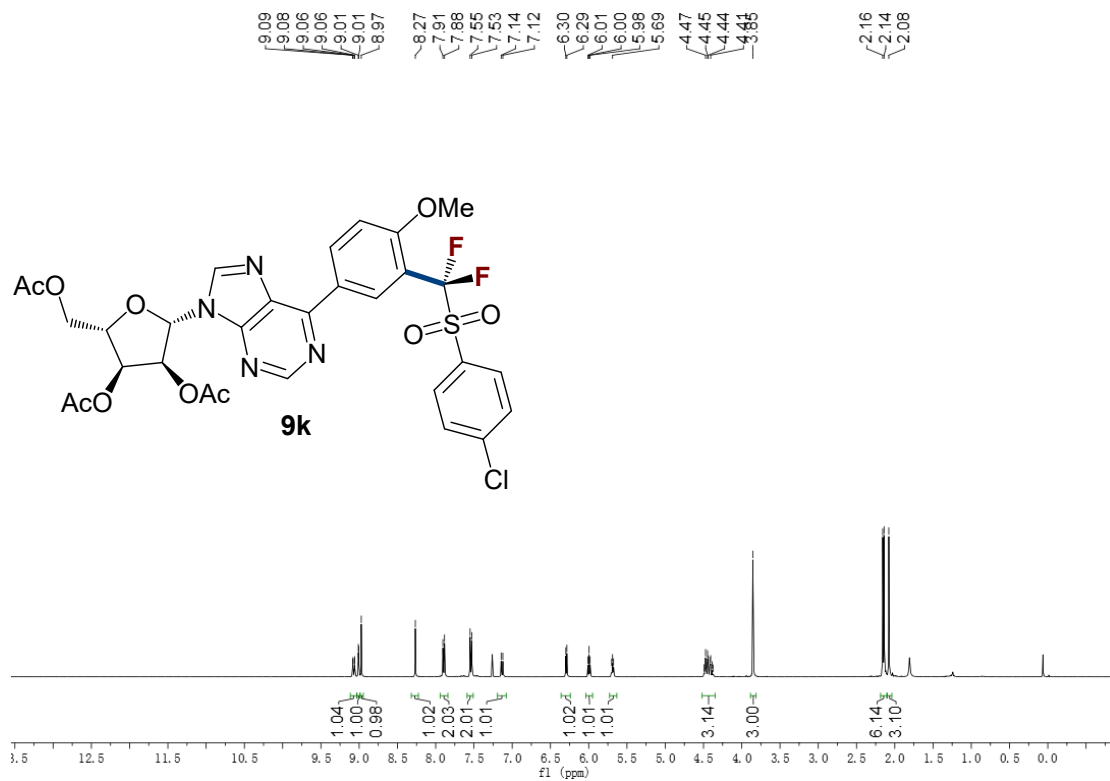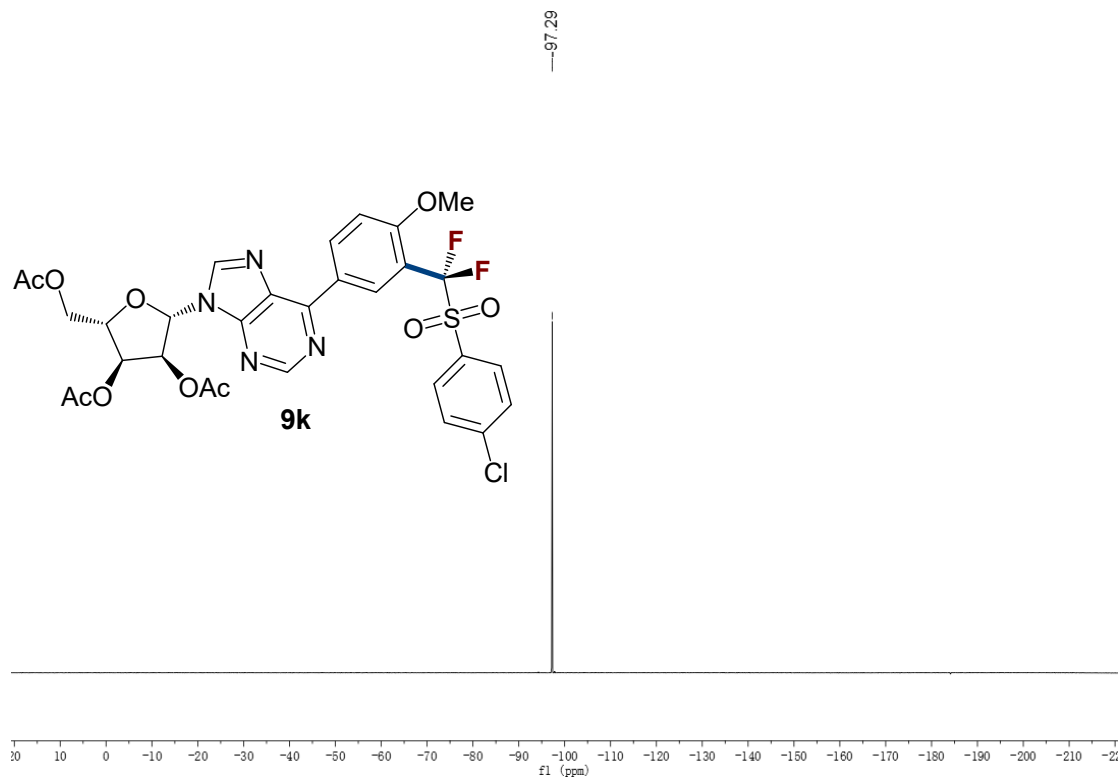



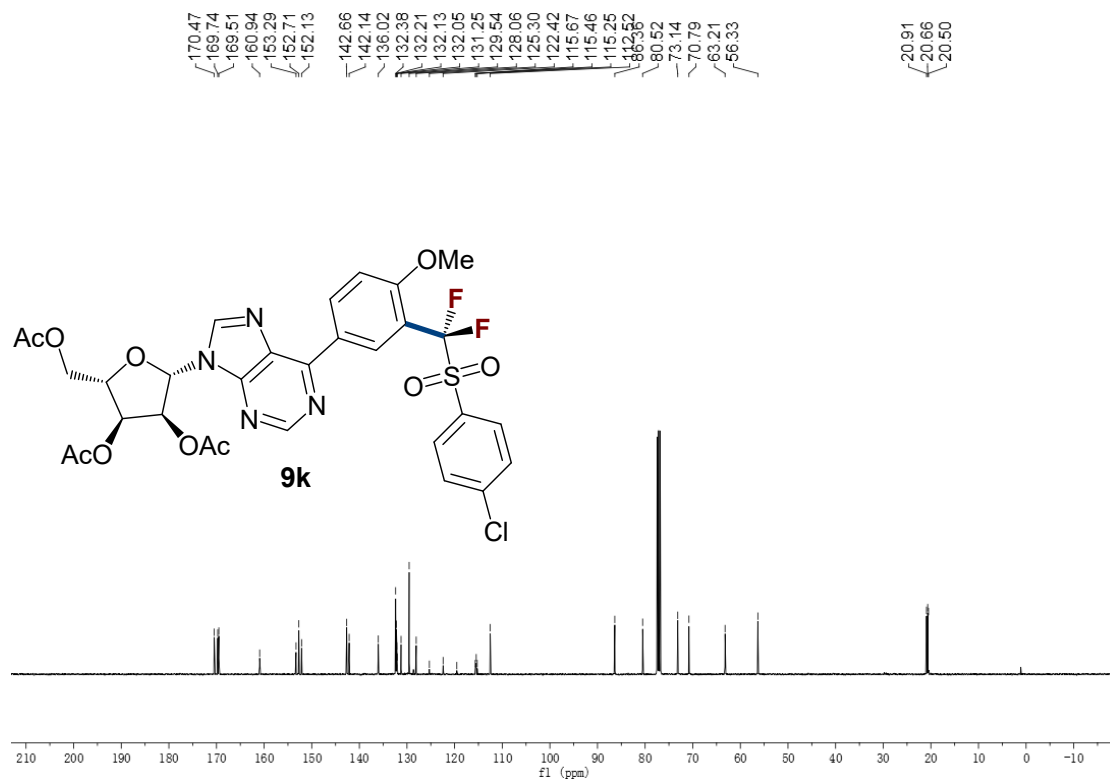

Supplement: d4qo00786g1.pdf [file d4qo00786g1.pdf]
